# Supplementary material for: A Framework to Evaluate the Impact of Armourstones on the Chemical Quality of Surface Water
Source: PLoS One. 2017 Jan 6;12(1):e0168926. doi: 10.1371/journal.pone.0168926 (PMC5217939; doi:10.1371/journal.pone.0168926)
Supplement: S1 File — Fig A and B show the results of two armourstone surveys performed by the BfG. Table A and Fig C basic information on the DSLT is presented. Information on chemicals and materials used in the study as well as on analyzes performed is given on page fou. Fig D shows the stepwise reduction of the initial parameter list. The full DSLT dataset with seven stones is presented in Tables B-H. All calculations (releasemax and releasemin) are based on the TS. In Table I conductivity and pH values are presented. Table J compares the nine days MRLs with the DSLT results. An overview on the evaluation of the blank criteria is given in Tables K and L. Figs I-R show the log/log graphs for CUS1-3, Granite, Granodiorite, Greywacke, Basalt, Karbon Quartzite and LDS. A chapter on “DSLT practical considerations and potential improvements of potential following technical specification” is also given. (PDF) [file pone.0168926.s001.pdf]

## Supporting information

# **A framework to evaluate the impact of armourstones on the chemical quality of surface water**

*Lars Duester, Dierk-Steffen Wahrendorf, Corinna Brinkmann, Anne-Lena Fabricius,  
Björn Meermann, Juergen Pelzer, Dennis Ecker, Monika Renner, Harald Schmid,  
Thomas A. Ternes and Peter Heininger*

Federal Institute of Hydrology, Division G – Qualitative Hydrology,  
Am Mainzer Tor 1, 56068 Koblenz, Germany.

Number of pages: 163  
Number of figures: 13  
Number of tables: 12

**Per year quantities of armourstones obtained by the WSV** In order to achieve an overview on the market diversity, in two surveys the armourstone purchases of the German Federal Waterways and Shipping Administration (WSV) in 2010 – 2012 and in 2012 – 2014 were requested from the administrations and summarized. In the first survey period (Fig A) the actually installed armourstone quantities and their origins were inquired. In order to verify these results, in a second survey period (Fig B) calls for tenders from the WSV were collected from two different online tender portals (national and EU based). After the bid period, the respective departments of the WSV were contacted and the acquired products were listed.

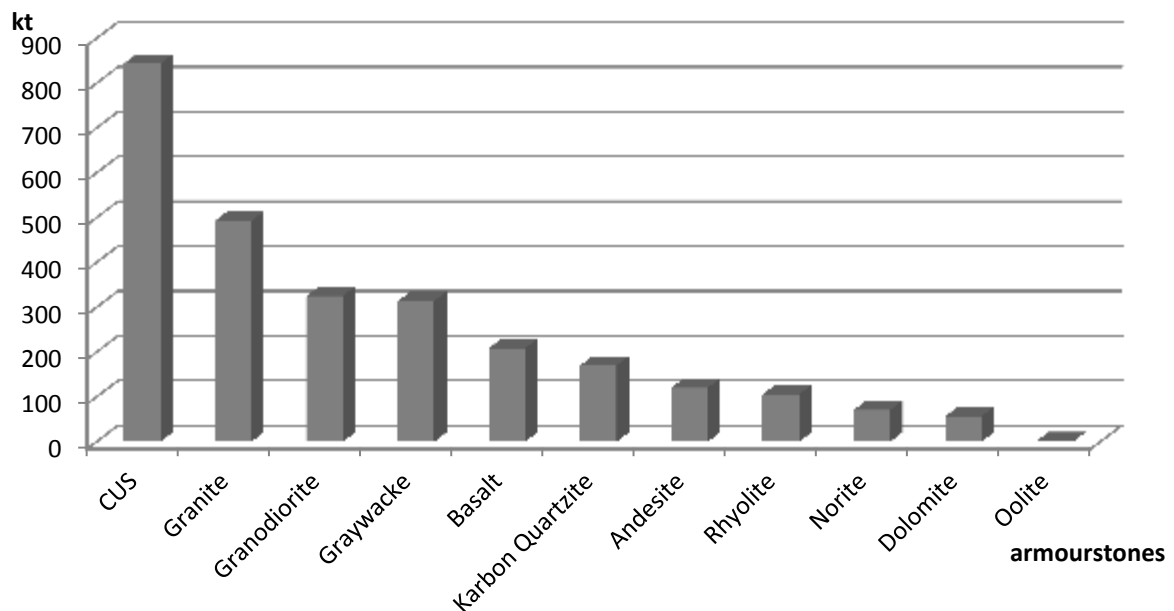

**Fig A.** Armourstones [kilo tons] installed by the WSV in German waterways between 01.2010 and 06.2012 (CUS = copper slag/product name: iron silicate stone). The names of the materials are as given by the distributors with exception of CUS.

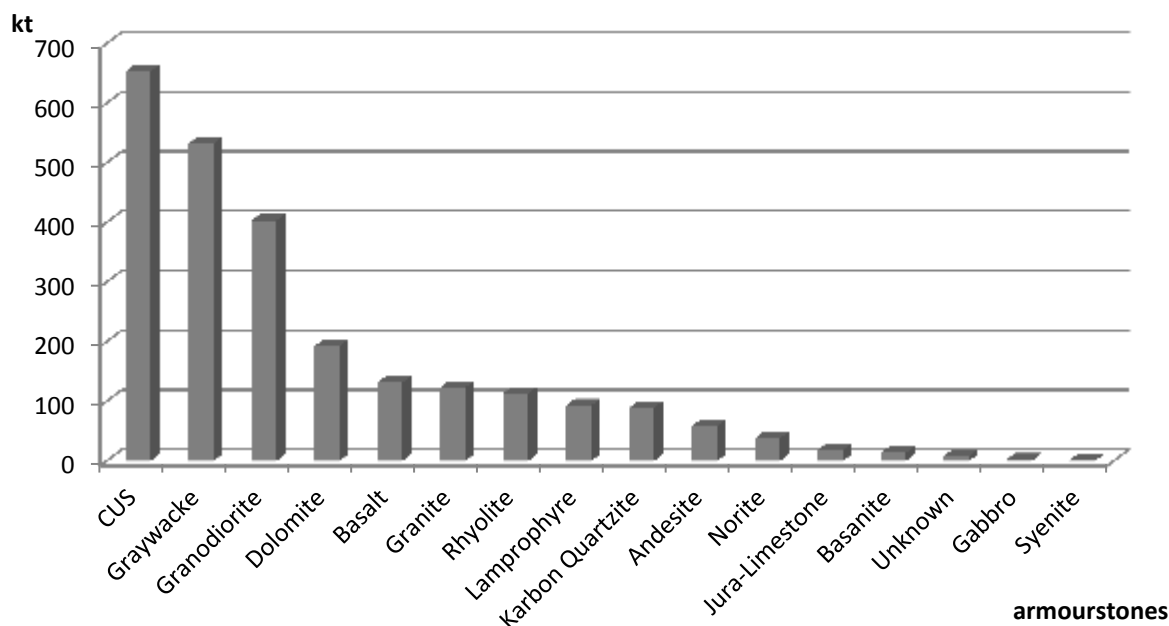

**Fig B.** Armourstones [kilo tons] purchased between 04.2012 and 06.2014 by the WSV. The names of the materials are as given by the distributors with exception of CUS.

The total amounts of armourstones purchased by the Federal Water and Shipping Administration (WSV) in Germany (two surveys, two years each) are very comparable (year 2010-12 and 2012-14). In both periods about 1.8 million tons of natural armourstones and between 0.6 and 0.8 million tons copper slag (CUS) were obtained. CUS was the only industrial by-product purchased. By widening the perspective on amounts potentially obtained by other customers (e.g., Federal States, communities and the industry/private sector like port authorities), only for Germany an annual volume of more than 20 million € can be expected. Based on two surveys, the most important armourstone materials were selected for testing with the DSLT method. The samples were obtained either directly on-site at the producer facilities or at the WSV storage facilities.

**Table A.** Time schedule for the water exchanges in DSLTs.

| Step/<br>Fraction | Time [d] | Variation<br>accepted | Time sum<br>[d] |
|-------------------|----------|-----------------------|-----------------|
| 1                 | 0.25     | $\pm 15$ min          | 0.25            |
| 2                 | 0.75     | $\pm 15$ min          | 1               |
| 3                 | 1.25     | $\pm 45$ min          | 2.25            |
| 4                 | 1.75     | $\pm 75$ min          | 4               |
| 5                 | 5        | $\pm 75$ min          | 9               |
| 6                 | 7        | $\pm 75$ min          | 16              |
| 7                 | 20       | $\pm 7$ h             | 36              |
| 8                 | 28       | $\pm 12$ h            | 64              |

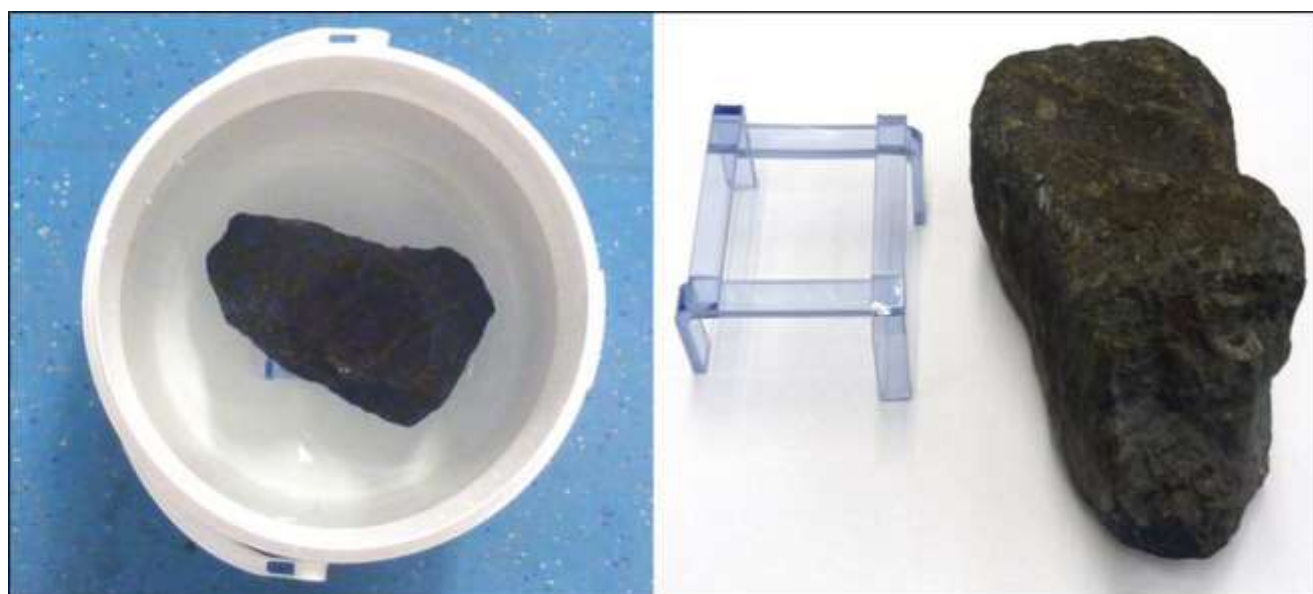

**Fig C.** DSLT setup as performed at the BfG.

### Testing procedures

The experimental setup is presented in Fig C. In this study 70 DSLTs were performed. Each of the 7 test materials was tested with 5 repetitions by two laboratories (BfG and a contract laboratory). This equals a total number of ~650 samples analyzed for 31 elements (including blanks, quality checks and certified reference materials). Since former studies had already shown pronounced charge dependencies of the metal(loid) release from CUS, two additional CUS materials

(CUS2 and CUS3) were included to increase the reliability of the dataset [1]. In derogation from the procedure described above, CUS 2 and 3 were only tested in the BfG laboratory and CUS3 only in four repetitions (due to a limited material availability). The eluate samples, including those from the DSLTs carried out by the contract laboratory, were analyzed by the BfG. All results presented are based on these data. In addition, analytical data of eluates were delivered by the contract laboratory, which are discussed in the results and discussion section.

**Chemicals, analyzes and materials BfG.** Ultrapure water was produced using an USF ELGA Purelab Plus system (ELGA LabWater GmbH, Germany) or Sartorius Arium pro VF (Sartorius Lab Instruments GmbH, Germany). ICP-elemental standards (1 g/L) and nitric acid ( $\text{HNO}_3$ , 65% w/w, for analysis) were purchased from Merck GmbH (Germany) or Bernd Kraft GmbH (Germany). The acid was sub-boiled using a dst-1000 (Saville Corporation, USA). Prior to use, all test vessels were rinsed at least for 24 hours with nitric acid ( $\text{HNO}_3$ , 1.3%). For filtration cellulose acetate syringe filter units with a 0.45  $\mu\text{m}$  cut-off (Minisart, Sartorius Lab Instruments GmbH, Germany) with disposable 10 mL syringes (B.Braun AG, Germany) were used. All samples were acidified to 1.3%  $\text{HNO}_3$  after filtration. The Al, B, Ba, Ca, Mg, Mn, Na, P, S, and Si concentrations in the eluates were determined by means of inductively coupled plasma-atomic emission spectroscopy (ICP-AES, Optima 8300, Perkin Elmer Inc., USA) and for the other elements by ICP-mass spectrometry (ICP-MS, Agilent 7700 series, Agilent Inc., Japan). The following certified reference materials were analyzed each measuring day and the deviation from the certified values was always < 10% for MS analyzes and for Al and Ba analyses from AES < 15%: SPS-SW1 and 2 (Spectrapure Standards, Spectrapure Inc., Norway); SLRS 5 (National Research Council Canada, Canada); TM 27.3 (Environment Canada, Canada); 1640a (National Institute of Standards and Technology, USA). The pH and the

conductivity presented in S9 Table were determined with a Multimeter (Multilab 540, WTW GmbH, Germany).

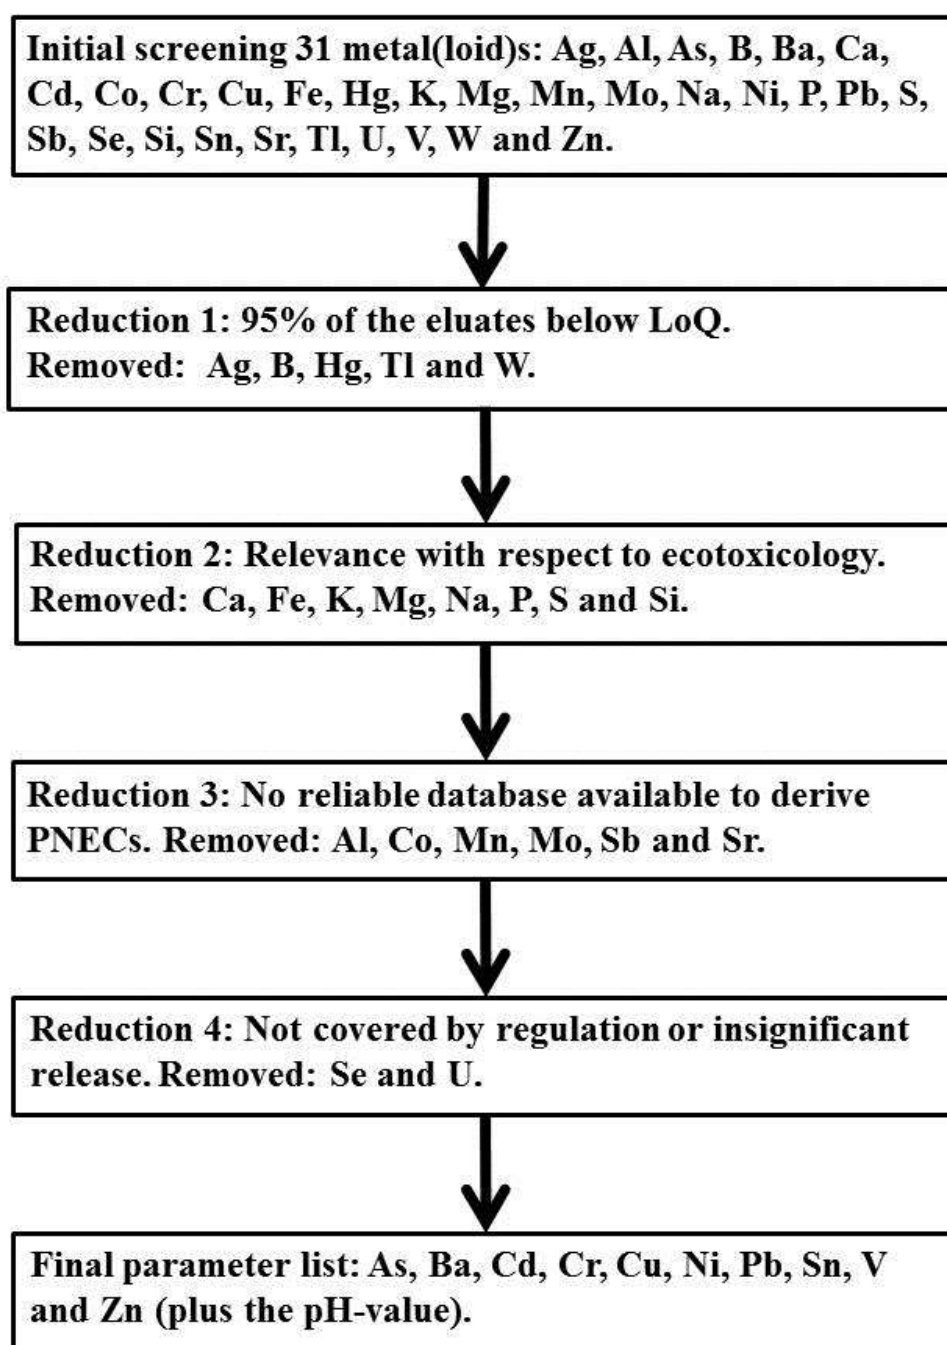

**Fig D.** Stepwise reduction of the parameter list as detailed in the text.

**Table B.** DSLT results Karbon Quartzite (LAB 1 DSLT contract laboratory, LAB 2 DSLT BfG).

| Stone | Fraction | LAB 1<br>Al<br>µg/l | min<br>r<br>mg/m <sup>2</sup> | max<br>r<br>mg/m <sup>2</sup> | LAB 2<br>Al<br>µg/l | min<br>r<br>mg/m <sup>2</sup> | max<br>r<br>mg/m <sup>2</sup> |
|-------|----------|---------------------|-------------------------------|-------------------------------|---------------------|-------------------------------|-------------------------------|
| 1     | 1        | <40.8               | 0.0                           | 3.26                          | <40.8               | 0.0                           | 3.26                          |
| 1     | 2        | <40.8               | 0.0                           | 3.26                          | <40.8               | 0.0                           | 3.26                          |
| 1     | 3        | <40.8               | 0.0                           | 3.26                          | <40.8               | 0.0                           | 3.26                          |
| 1     | 4        | <40.8               | 0.0                           | 3.26                          | <40.8               | 0.0                           | 3.26                          |
| 1     | 5        | <40.8               | 0.0                           | 3.26                          | <40.8               | 0.0                           | 3.26                          |
| 1     | 6        | <40.8               | 0.0                           | 3.26                          | <40.8               | 0.0                           | 3.26                          |
| 1     | 7        | <40.8               | 0.0                           | 3.26                          | <40.8               | 0.0                           | 3.26                          |
| 1     | 8        | <40.8               | 0.0                           | 3.26                          | <40.8               | 0.0                           | 3.26                          |
| 2     | 1        | <40.8               | 0.0                           | 3.26                          | <40.8               | 0.0                           | 3.26                          |
| 2     | 2        | <40.8               | 0.0                           | 3.26                          | <40.8               | 0.0                           | 3.26                          |
| 2     | 3        | <40.8               | 0.0                           | 3.26                          | <40.8               | 0.0                           | 3.26                          |
| 2     | 4        | <40.8               | 0.0                           | 3.26                          | <40.8               | 0.0                           | 3.26                          |
| 2     | 5        | <40.8               | 0.0                           | 3.26                          | <40.8               | 0.0                           | 3.26                          |
| 2     | 6        | <40.8               | 0.0                           | 3.26                          | <40.8               | 0.0                           | 3.26                          |
| 2     | 7        | <40.8               | 0.0                           | 3.26                          | <40.8               | 0.0                           | 3.26                          |
| 2     | 8        | <40.8               | 0.0                           | 3.26                          | <40.8               | 0.0                           | 3.26                          |
| 3     | 1        | <40.8               | 0.0                           | 3.26                          | <40.8               | 0.0                           | 3.26                          |
| 3     | 2        | <40.8               | 0.0                           | 3.26                          | <40.8               | 0.0                           | 3.26                          |
| 3     | 3        | <40.8               | 0.0                           | 3.26                          | <40.8               | 0.0                           | 3.26                          |
| 3     | 4        | <40.8               | 0.0                           | 3.26                          | <40.8               | 0.0                           | 3.26                          |
| 3     | 5        | <40.8               | 0.0                           | 3.26                          | <40.8               | 0.0                           | 3.26                          |
| 3     | 6        | <40.8               | 0.0                           | 3.26                          | <40.8               | 0.0                           | 3.26                          |
| 3     | 7        | <40.8               | 0.0                           | 3.26                          | <40.8               | 0.0                           | 3.26                          |
| 3     | 8        | <40.8               | 0.0                           | 3.26                          | <40.8               | 0.0                           | 3.26                          |
| 4     | 1        | <40.8               | 0.0                           | 3.26                          | <40.8               | 0.0                           | 3.26                          |
| 4     | 2        | <40.8               | 0.0                           | 3.26                          | <40.8               | 0.0                           | 3.26                          |
| 4     | 3        | <40.8               | 0.0                           | 3.26                          | <40.8               | 0.0                           | 3.26                          |
| 4     | 4        | <40.8               | 0.0                           | 3.26                          | <40.8               | 0.0                           | 3.26                          |
| 4     | 5        | <40.8               | 0.0                           | 3.26                          | <40.8               | 0.0                           | 3.26                          |
| 4     | 6        | <40.8               | 0.0                           | 3.26                          | <40.8               | 0.0                           | 3.26                          |
| 4     | 7        | <40.8               | 0.0                           | 3.26                          | <40.8               | 0.0                           | 3.26                          |
| 4     | 8        | <40.8               | 0.0                           | 3.26                          | <40.8               | 0.0                           | 3.26                          |
| 5     | 1        | <40.8               | 0.0                           | 3.26                          | <40.8               | 0.0                           | 3.26                          |
| 5     | 2        | <40.8               | 0.0                           | 3.26                          | <40.8               | 0.0                           | 3.26                          |
| 5     | 3        | <40.8               | 0.0                           | 3.26                          | <40.8               | 0.0                           | 3.26                          |
| 5     | 4        | <40.8               | 0.0                           | 3.26                          | <40.8               | 0.0                           | 3.26                          |
| 5     | 5        | <40.8               | 0.0                           | 3.26                          | <40.8               | 0.0                           | 3.26                          |
| 5     | 6        | <40.8               | 0.0                           | 3.26                          | <40.8               | 0.0                           | 3.26                          |
| 5     | 7        | <40.8               | 0.0                           | 3.26                          | <40.8               | 0.0                           | 3.26                          |
| 5     | 8        | <40.8               | 0.0                           | 3.26                          | <40.8               | 0.0                           | 3.26                          |
|       |          |                     | Σ min                         | Σ max                         |                     | Σ min                         | Σ max                         |
| 1     |          |                     | 0.0                           | 26.1                          |                     | 0.0                           | 26.1                          |
| 2     |          |                     | 0.0                           | 26.1                          |                     | 0.0                           | 26.1                          |
| 3     |          |                     | 0.0                           | 26.1                          |                     | 0.0                           | 26.1                          |
| 4     |          |                     | 0.0                           | 26.1                          |                     | 0.0                           | 26.1                          |
| 5     |          |                     | 0.0                           | 26.1                          |                     | 0.0                           | 26.1                          |
| Mean  |          |                     | 0.0                           | 26.1                          |                     | 0.0                           | 26.1                          |
| SD    |          |                     | 0.0                           | 0.0                           |                     | 0.0                           | 0.0                           |

**Table B.** Continued Karbon Quartzite.

| Stone | Fraction | LAB 1<br>As<br>µg/l | min<br>r<br>mg/m <sup>2</sup> | max<br>r<br>mg/m <sup>2</sup> | LAB 2<br>As<br>µg/l | min<br>r<br>mg/m <sup>2</sup> | max<br>r<br>mg/m <sup>2</sup> |
|-------|----------|---------------------|-------------------------------|-------------------------------|---------------------|-------------------------------|-------------------------------|
| 1     | 1        | 0.09                | 0.01                          | 0.01                          | <0.04               | 0.00                          | 0.00                          |
| 1     | 2        | 0.06                | 0.00                          | 0.00                          | <0.04               | 0.00                          | 0.00                          |
| 1     | 3        | 0.06                | 0.00                          | 0.00                          | <0.04               | 0.00                          | 0.00                          |
| 1     | 4        | 0.04                | 0.00                          | 0.00                          | <0.04               | 0.00                          | 0.00                          |
| 1     | 5        | 0.09                | 0.01                          | 0.01                          | 0.05                | 0.00                          | 0.00                          |
| 1     | 6        | 0.13                | 0.01                          | 0.01                          | <0.04               | 0.00                          | 0.00                          |
| 1     | 7        | 0.12                | 0.01                          | 0.01                          | 0.06                | 0.00                          | 0.00                          |
| 1     | 8        | 0.16                | 0.01                          | 0.01                          | 0.07                | 0.01                          | 0.01                          |
| 2     | 1        | 0.20                | 0.02                          | 0.02                          | <0.04               | 0.00                          | 0.00                          |
| 2     | 2        | 0.24                | 0.02                          | 0.02                          | <0.04               | 0.00                          | 0.00                          |
| 2     | 3        | 0.19                | 0.02                          | 0.02                          | <0.04               | 0.00                          | 0.00                          |
| 2     | 4        | 0.13                | 0.01                          | 0.01                          | <0.04               | 0.00                          | 0.00                          |
| 2     | 5        | 0.25                | 0.02                          | 0.02                          | <0.04               | 0.00                          | 0.00                          |
| 2     | 6        | 0.32                | 0.03                          | 0.03                          | <0.04               | 0.00                          | 0.00                          |
| 2     | 7        | 0.42                | 0.03                          | 0.03                          | <0.04               | 0.00                          | 0.00                          |
| 2     | 8        | 0.80                | 0.06                          | 0.06                          | <0.04               | 0.00                          | 0.00                          |
| 3     | 1        | 0.06                | 0.00                          | 0.00                          | 0.06                | 0.00                          | 0.00                          |
| 3     | 2        | 0.06                | 0.00                          | 0.00                          | 0.07                | 0.01                          | 0.01                          |
| 3     | 3        | 0.03                | 0.00                          | 0.00                          | 0.06                | 0.00                          | 0.00                          |
| 3     | 4        | 0.03                | 0.00                          | 0.00                          | 0.05                | 0.00                          | 0.00                          |
| 3     | 5        | 0.07                | 0.01                          | 0.01                          | 0.09                | 0.01                          | 0.01                          |
| 3     | 6        | 0.07                | 0.01                          | 0.01                          | 0.08                | 0.01                          | 0.01                          |
| 3     | 7        | 0.05                | 0.00                          | 0.00                          | 0.12                | 0.01                          | 0.01                          |
| 3     | 8        | 0.12                | 0.01                          | 0.01                          | 0.13                | 0.01                          | 0.01                          |
| 4     | 1        | 0.06                | 0.01                          | 0.01                          | <0.04               | 0.00                          | 0.00                          |
| 4     | 2        | 0.06                | 0.00                          | 0.00                          | <0.04               | 0.00                          | 0.00                          |
| 4     | 3        | 0.05                | 0.00                          | 0.00                          | <0.04               | 0.00                          | 0.00                          |
| 4     | 4        | 0.10                | 0.01                          | 0.01                          | <0.04               | 0.00                          | 0.00                          |
| 4     | 5        | 0.13                | 0.01                          | 0.01                          | <0.04               | 0.00                          | 0.00                          |
| 4     | 6        | 0.13                | 0.01                          | 0.01                          | <0.04               | 0.00                          | 0.00                          |
| 4     | 7        | 0.13                | 0.01                          | 0.01                          | <0.04               | 0.00                          | 0.00                          |
| 4     | 8        | 0.21                | 0.02                          | 0.02                          | <0.04               | 0.00                          | 0.00                          |
| 5     | 1        | 0.05                | 0.00                          | 0.00                          | <0.04               | 0.00                          | 0.00                          |
| 5     | 2        | 0.06                | 0.00                          | 0.00                          | <0.04               | 0.00                          | 0.00                          |
| 5     | 3        | <0.03               | 0.00                          | 0.00                          | <0.04               | 0.00                          | 0.00                          |
| 5     | 4        | 0.05                | 0.00                          | 0.00                          | <0.04               | 0.00                          | 0.00                          |
| 5     | 5        | 0.05                | 0.00                          | 0.00                          | <0.04               | 0.00                          | 0.00                          |
| 5     | 6        | 0.06                | 0.01                          | 0.01                          | <0.04               | 0.00                          | 0.00                          |
| 5     | 7        | 0.06                | 0.00                          | 0.00                          | 0.06                | 0.01                          | 0.01                          |
| 5     | 8        | 0.13                | 0.01                          | 0.01                          | 0.07                | 0.01                          | 0.01                          |
|       |          |                     | Σ min                         | Σ max                         |                     | Σ min                         | Σ max                         |
| 1     |          |                     | 0.06                          | 0.06                          |                     | 0.01                          | 0.03                          |
| 2     |          |                     | 0.20                          | 0.20                          |                     | 0.00                          | 0.03                          |
| 3     |          |                     | 0.04                          | 0.04                          |                     | 0.05                          | 0.05                          |
| 4     |          |                     | 0.07                          | 0.07                          |                     | 0.00                          | 0.03                          |
| 5     |          |                     | 0.04                          | 0.04                          |                     | 0.01                          | 0.03                          |
| Mean  |          |                     | 0.08                          | 0.08                          |                     | 0.02                          | 0.03                          |
| SD    |          |                     | 0.07                          | 0.07                          |                     | 0.02                          | 0.01                          |

**Table B.** Continued Karbon Quartzite.

| Stone | Fraction | LAB 1<br>Ba<br>µg/l | min<br>r<br>mg/m <sup>2</sup> | max<br>r<br>mg/m <sup>2</sup> | LAB 2<br>Ba<br>µg/l | min<br>r<br>mg/m <sup>2</sup> | max<br>r<br>mg/m <sup>2</sup> |
|-------|----------|---------------------|-------------------------------|-------------------------------|---------------------|-------------------------------|-------------------------------|
| 1     | 1        | 0.8                 | 0.1                           | 0.1                           | 0.3                 | 0.02                          | 0.02                          |
| 1     | 2        | 349.1               | 27.9                          | 27.9                          | 0.4                 | 0.04                          | 0.04                          |
| 1     | 3        | 384.5               | 30.8                          | 30.8                          | 0.4                 | 0.03                          | 0.03                          |
| 1     | 4        | 413.1               | 33.1                          | 33.1                          | 0.4                 | 0.03                          | 0.03                          |
| 1     | 5        | 368.0               | 29.4                          | 29.4                          | 0.5                 | 0.04                          | 0.04                          |
| 1     | 6        | 386.7               | 30.9                          | 30.9                          | 0.5                 | 0.04                          | 0.04                          |
| 1     | 7        | 474.5               | 38.0                          | 38.0                          | 0.4                 | 0.03                          | 0.03                          |
| 1     | 8        | 348.3               | 27.9                          | 27.9                          | 0.4                 | 0.03                          | 0.03                          |
| 2     | 1        | 1.2                 | 0.1                           | 0.1                           | 0.3                 | 0.03                          | 0.03                          |
| 2     | 2        | 406.7               | 32.5                          | 32.5                          | 0.3                 | 0.03                          | 0.03                          |
| 2     | 3        | 411.4               | 32.9                          | 32.9                          | 0.4                 | 0.03                          | 0.03                          |
| 2     | 4        | 26.1                | 2.1                           | 2.1                           | 0.4                 | 0.03                          | 0.03                          |
| 2     | 5        | 393.4               | 31.5                          | 31.5                          | 0.5                 | 0.04                          | 0.04                          |
| 2     | 6        | 338.3               | 27.1                          | 27.1                          | 0.4                 | 0.03                          | 0.03                          |
| 2     | 7        | 434.3               | 34.7                          | 34.7                          | 0.4                 | 0.03                          | 0.03                          |
| 2     | 8        | 365.3               | 29.2                          | 29.2                          | 0.4                 | 0.03                          | 0.03                          |
| 3     | 1        | 4.0                 | 0.3                           | 0.3                           | 3.5                 | 0.28                          | 0.28                          |
| 3     | 2        | 387.5               | 31.0                          | 31.0                          | 5.0                 | 0.40                          | 0.40                          |
| 3     | 3        | 40.0                | 3.2                           | 3.2                           | 2.7                 | 0.22                          | 0.22                          |
| 3     | 4        | 41.2                | 3.3                           | 3.3                           | 4.2                 | 0.34                          | 0.34                          |
| 3     | 5        | 496.5               | 39.7                          | 39.7                          | 4.4                 | 0.35                          | 0.35                          |
| 3     | 6        | 470.3               | 37.6                          | 37.6                          | 6.0                 | 0.48                          | 0.48                          |
| 3     | 7        | 484.9               | 38.8                          | 38.8                          | 6.1                 | 0.49                          | 0.49                          |
| 3     | 8        | 393.1               | 31.4                          | 31.4                          | 6.4                 | 0.51                          | 0.51                          |
| 4     | 1        | 2.6                 | 0.2                           | 0.2                           | 0.5                 | 0.04                          | 0.04                          |
| 4     | 2        | 484.9               | 38.8                          | 38.8                          | 0.7                 | 0.05                          | 0.05                          |
| 4     | 3        | 384.0               | 30.7                          | 30.7                          | 0.7                 | 0.06                          | 0.06                          |
| 4     | 4        | 440.0               | 35.2                          | 35.2                          | 0.9                 | 0.08                          | 0.08                          |
| 4     | 5        | 400.6               | 32.0                          | 32.0                          | 1.0                 | 0.08                          | 0.08                          |
| 4     | 6        | 437.8               | 35.0                          | 35.0                          | 0.6                 | 0.05                          | 0.05                          |
| 4     | 7        | 445.3               | 35.6                          | 35.6                          | 0.6                 | 0.05                          | 0.05                          |
| 4     | 8        | 412.6               | 33.0                          | 33.0                          | 0.4                 | 0.03                          | 0.03                          |
| 5     | 1        | 0.9                 | 0.1                           | 0.1                           | 0.5                 | 0.04                          | 0.04                          |
| 5     | 2        | 408.1               | 32.6                          | 32.6                          | 0.4                 | 0.03                          | 0.03                          |
| 5     | 3        | 25.9                | 2.1                           | 2.1                           | 0.5                 | 0.04                          | 0.04                          |
| 5     | 4        | 397.6               | 31.8                          | 31.8                          | 1.2                 | 0.09                          | 0.09                          |
| 5     | 5        | 448.0               | 35.8                          | 35.8                          | 0.5                 | 0.04                          | 0.04                          |
| 5     | 6        | 444.3               | 35.5                          | 35.5                          | 0.7                 | 0.06                          | 0.06                          |
| 5     | 7        | 491.4               | 39.3                          | 39.3                          | 1.3                 | 0.10                          | 0.10                          |
| 5     | 8        | 458.3               | 36.7                          | 36.7                          | 1.0                 | 0.08                          | 0.08                          |
|       |          |                     | Σ min                         | Σ max                         |                     | Σ min                         | Σ max                         |
| 1     |          |                     | 218.0                         | 218.0                         |                     | 0.26                          | 0.26                          |
| 2     |          |                     | 190.1                         | 190.1                         |                     | 0.26                          | 0.26                          |
| 3     |          |                     | 185.4                         | 185.4                         |                     | 3.06                          | 3.06                          |
| 4     |          |                     | 240.6                         | 240.6                         |                     | 0.44                          | 0.44                          |
| 5     |          |                     | 214.0                         | 214.0                         |                     | 0.49                          | 0.49                          |
| Mean  |          |                     | 209.6                         | 209.6                         |                     | 0.90                          | 0.90                          |
| SD    |          |                     | 22.5                          | 22.5                          |                     | 1.21                          | 1.21                          |

**Table B.** Continued Karbon Quartzite.

| Stone | Fraction | LAB 1<br>Cd<br>µg/l | min<br>r<br>mg/m <sup>2</sup> | max<br>r<br>mg/m <sup>2</sup> | LAB 2<br>Cd<br>µg/l | min<br>r<br>mg/m <sup>2</sup> | max<br>r<br>mg/m <sup>2</sup> |
|-------|----------|---------------------|-------------------------------|-------------------------------|---------------------|-------------------------------|-------------------------------|
| 1     | 1        | 0.07                | 0.005                         | 0.005                         | <0.04               | 0.000                         | 0.003                         |
| 1     | 2        | 0.03                | 0.002                         | 0.002                         | <0.04               | 0.000                         | 0.003                         |
| 1     | 3        | 0.03                | 0.003                         | 0.003                         | <0.04               | 0.000                         | 0.003                         |
| 1     | 4        | 0.03                | 0.002                         | 0.002                         | <0.04               | 0.000                         | 0.003                         |
| 1     | 5        | 0.03                | 0.003                         | 0.003                         | <0.04               | 0.000                         | 0.003                         |
| 1     | 6        | 0.04                | 0.003                         | 0.003                         | <0.04               | 0.000                         | 0.003                         |
| 1     | 7        | 0.04                | 0.003                         | 0.003                         | <0.04               | 0.000                         | 0.003                         |
| 1     | 8        | 0.04                | 0.003                         | 0.003                         | <0.04               | 0.000                         | 0.003                         |
| 2     | 1        | 0.01                | 0.001                         | 0.001                         | <0.04               | 0.000                         | 0.003                         |
| 2     | 2        | 0.03                | 0.002                         | 0.002                         | <0.04               | 0.000                         | 0.003                         |
| 2     | 3        | 0.02                | 0.002                         | 0.002                         | <0.04               | 0.000                         | 0.003                         |
| 2     | 4        | <0.01               | 0.000                         | 0.001                         | <0.04               | 0.000                         | 0.003                         |
| 2     | 5        | 0.03                | 0.002                         | 0.002                         | <0.04               | 0.000                         | 0.003                         |
| 2     | 6        | 0.02                | 0.001                         | 0.001                         | <0.04               | 0.000                         | 0.003                         |
| 2     | 7        | 0.03                | 0.003                         | 0.003                         | <0.04               | 0.000                         | 0.003                         |
| 2     | 8        | 0.02                | 0.002                         | 0.002                         | <0.04               | 0.000                         | 0.003                         |
| 3     | 1        | 0.07                | 0.006                         | 0.006                         | <0.04               | 0.000                         | 0.003                         |
| 3     | 2        | 0.03                | 0.002                         | 0.002                         | <0.04               | 0.000                         | 0.003                         |
| 3     | 3        | <0.01               | 0.000                         | 0.001                         | <0.04               | 0.000                         | 0.003                         |
| 3     | 4        | <0.01               | 0.000                         | 0.001                         | <0.04               | 0.000                         | 0.003                         |
| 3     | 5        | 0.04                | 0.004                         | 0.004                         | <0.04               | 0.000                         | 0.003                         |
| 3     | 6        | 0.03                | 0.002                         | 0.002                         | <0.04               | 0.000                         | 0.003                         |
| 3     | 7        | 0.04                | 0.003                         | 0.003                         | <0.04               | 0.000                         | 0.003                         |
| 3     | 8        | 0.02                | 0.002                         | 0.002                         | <0.04               | 0.000                         | 0.003                         |
| 4     | 1        | 0.32                | 0.026                         | 0.026                         | <0.04               | 0.000                         | 0.003                         |
| 4     | 2        | 0.02                | 0.002                         | 0.002                         | <0.04               | 0.000                         | 0.003                         |
| 4     | 3        | 0.03                | 0.002                         | 0.002                         | <0.04               | 0.000                         | 0.003                         |
| 4     | 4        | 0.02                | 0.002                         | 0.002                         | <0.04               | 0.000                         | 0.003                         |
| 4     | 5        | 0.03                | 0.002                         | 0.002                         | <0.04               | 0.000                         | 0.003                         |
| 4     | 6        | 0.03                | 0.002                         | 0.002                         | <0.04               | 0.000                         | 0.003                         |
| 4     | 7        | 0.03                | 0.003                         | 0.003                         | <0.04               | 0.000                         | 0.003                         |
| 4     | 8        | 0.04                | 0.003                         | 0.003                         | <0.04               | 0.000                         | 0.003                         |
| 5     | 1        | 0.02                | 0.002                         | 0.002                         | <0.04               | 0.000                         | 0.003                         |
| 5     | 2        | 0.02                | 0.002                         | 0.002                         | <0.04               | 0.000                         | 0.003                         |
| 5     | 3        | 0.00                | 0.000                         | 0.000                         | <0.04               | 0.000                         | 0.003                         |
| 5     | 4        | 0.03                | 0.003                         | 0.003                         | <0.04               | 0.000                         | 0.003                         |
| 5     | 5        | 0.03                | 0.002                         | 0.002                         | <0.04               | 0.000                         | 0.003                         |
| 5     | 6        | 0.02                | 0.002                         | 0.002                         | <0.04               | 0.000                         | 0.003                         |
| 5     | 7        | 0.04                | 0.003                         | 0.003                         | <0.04               | 0.000                         | 0.003                         |
| 5     | 8        | 0.04                | 0.003                         | 0.003                         | <0.04               | 0.000                         | 0.003                         |
|       |          |                     | Σ min                         | Σ max                         |                     | Σ min                         | Σ max                         |
| 1     |          |                     | 0.025                         | 0.025                         |                     | 0.000                         | 0.026                         |
| 2     |          |                     | 0.013                         | 0.014                         |                     | 0.000                         | 0.026                         |
| 3     |          |                     | 0.019                         | 0.020                         |                     | 0.000                         | 0.026                         |
| 4     |          |                     | 0.042                         | 0.042                         |                     | 0.000                         | 0.026                         |
| 5     |          |                     | 0.017                         | 0.017                         |                     | 0.000                         | 0.026                         |
| Mean  |          |                     | 0.023                         | 0.023                         |                     | 0.000                         | 0.026                         |
| SD    |          |                     | 0.011                         | 0.011                         |                     | 0.000                         | 0.000                         |

**Table B.** Continued Karbon Quartzite.

| Stone | Fraction | LAB 1<br>Co<br>µg/l | min<br>r<br>mg/m <sup>2</sup> | max<br>r<br>mg/m <sup>2</sup> | LAB 2<br>Co<br>µg/l | min<br>r<br>mg/m <sup>2</sup> | max<br>r<br>mg/m <sup>2</sup> |
|-------|----------|---------------------|-------------------------------|-------------------------------|---------------------|-------------------------------|-------------------------------|
| 1     | 1        | 0.23                | 0.018                         | 0.018                         | <0.04               | 0.000                         | 0.003                         |
| 1     | 2        | 0.07                | 0.006                         | 0.006                         | <0.04               | 0.000                         | 0.003                         |
| 1     | 3        | 0.08                | 0.006                         | 0.006                         | <0.04               | 0.000                         | 0.003                         |
| 1     | 4        | 0.08                | 0.006                         | 0.006                         | <0.04               | 0.000                         | 0.003                         |
| 1     | 5        | 0.10                | 0.008                         | 0.008                         | <0.04               | 0.000                         | 0.003                         |
| 1     | 6        | 0.13                | 0.010                         | 0.010                         | <0.04               | 0.000                         | 0.003                         |
| 1     | 7        | 0.45                | 0.036                         | 0.036                         | <0.04               | 0.000                         | 0.003                         |
| 1     | 8        | 0.84                | 0.067                         | 0.067                         | <0.04               | 0.000                         | 0.003                         |
| 2     | 1        | 0.09                | 0.007                         | 0.007                         | <0.04               | 0.000                         | 0.003                         |
| 2     | 2        | 0.08                | 0.006                         | 0.006                         | <0.04               | 0.000                         | 0.003                         |
| 2     | 3        | 0.07                | 0.006                         | 0.006                         | <0.04               | 0.000                         | 0.003                         |
| 2     | 4        | 0.04                | 0.003                         | 0.003                         | <0.04               | 0.000                         | 0.003                         |
| 2     | 5        | 0.09                | 0.007                         | 0.007                         | <0.04               | 0.000                         | 0.003                         |
| 2     | 6        | 0.08                | 0.007                         | 0.007                         | 0.07                | 0.000                         | 0.005                         |
| 2     | 7        | 0.09                | 0.007                         | 0.007                         | 0.21                | 0.000                         | 0.016                         |
| 2     | 8        | 0.15                | 0.012                         | 0.012                         | 0.24                | 0.000                         | 0.019                         |
| 3     | 1        | 0.06                | 0.004                         | 0.004                         | 0.05                | 0.000                         | 0.004                         |
| 3     | 2        | 0.09                | 0.007                         | 0.007                         | <0.04               | 0.000                         | 0.003                         |
| 3     | 3        | 0.03                | 0.002                         | 0.002                         | <0.04               | 0.000                         | 0.003                         |
| 3     | 4        | 0.03                | 0.002                         | 0.002                         | <0.04               | 0.000                         | 0.003                         |
| 3     | 5        | 0.12                | 0.009                         | 0.009                         | <0.04               | 0.000                         | 0.003                         |
| 3     | 6        | 0.11                | 0.009                         | 0.009                         | 0.04                | 0.000                         | 0.003                         |
| 3     | 7        | 0.09                | 0.007                         | 0.007                         | 0.14                | 0.000                         | 0.011                         |
| 3     | 8        | 0.12                | 0.010                         | 0.010                         | 0.20                | 0.000                         | 0.016                         |
| 4     | 1        | 0.22                | 0.018                         | 0.018                         | <0.04               | 0.000                         | 0.003                         |
| 4     | 2        | 0.10                | 0.008                         | 0.008                         | <0.04               | 0.000                         | 0.003                         |
| 4     | 3        | 0.07                | 0.006                         | 0.006                         | <0.04               | 0.000                         | 0.003                         |
| 4     | 4        | 0.10                | 0.008                         | 0.008                         | <0.04               | 0.000                         | 0.003                         |
| 4     | 5        | 0.09                | 0.007                         | 0.007                         | <0.04               | 0.000                         | 0.003                         |
| 4     | 6        | 0.12                | 0.010                         | 0.010                         | <0.04               | 0.000                         | 0.003                         |
| 4     | 7        | 0.30                | 0.024                         | 0.024                         | <0.04               | 0.000                         | 0.003                         |
| 4     | 8        | 0.60                | 0.048                         | 0.048                         | <0.04               | 0.000                         | 0.003                         |
| 5     | 1        | 0.15                | 0.012                         | 0.012                         | <0.04               | 0.000                         | 0.003                         |
| 5     | 2        | 0.08                | 0.006                         | 0.006                         | <0.04               | 0.000                         | 0.003                         |
| 5     | 3        | 0.05                | 0.004                         | 0.004                         | <0.04               | 0.000                         | 0.003                         |
| 5     | 4        | 0.11                | 0.009                         | 0.009                         | <0.04               | 0.000                         | 0.003                         |
| 5     | 5        | 0.19                | 0.015                         | 0.015                         | <0.04               | 0.000                         | 0.003                         |
| 5     | 6        | 0.30                | 0.024                         | 0.024                         | <0.04               | 0.000                         | 0.003                         |
| 5     | 7        | 0.79                | 0.063                         | 0.063                         | <0.04               | 0.000                         | 0.003                         |
| 5     | 8        | 1.23                | 0.098                         | 0.098                         | <0.04               | 0.000                         | 0.003                         |
|       |          |                     | Σ min                         | Σ max                         |                     | Σ min                         | Σ max                         |
| 1     |          |                     | 0.159                         | 0.159                         |                     | 0.000                         | 0.026                         |
| 2     |          |                     | 0.057                         | 0.057                         |                     | 0.000                         | 0.057                         |
| 3     |          |                     | 0.052                         | 0.052                         |                     | 0.000                         | 0.046                         |
| 4     |          |                     | 0.129                         | 0.129                         |                     | 0.000                         | 0.026                         |
| 5     |          |                     | 0.232                         | 0.232                         |                     | 0.000                         | 0.026                         |
| Mean  |          |                     | 0.126                         | 0.126                         |                     | 0.000                         | 0.036                         |
| SD    |          |                     | 0.075                         | 0.075                         |                     | 0.000                         | 0.015                         |

**Table B.** Continued Karbon Quartzite.

| Stone | Fraction | LAB 1<br>Cr<br>µg/l | min<br>r<br>mg/m <sup>2</sup> | max<br>r<br>mg/m <sup>2</sup> | LAB 2<br>Cr<br>µg/l | min<br>r<br>mg/m <sup>2</sup> | max<br>r<br>mg/m <sup>2</sup> |
|-------|----------|---------------------|-------------------------------|-------------------------------|---------------------|-------------------------------|-------------------------------|
| 1     | 1        | 0.09                | 0.007                         | 0.007                         | <0.05               | 0.000                         | 0.004                         |
| 1     | 2        | 0.09                | 0.007                         | 0.007                         | 1.87                | 0.149                         | 0.149                         |
| 1     | 3        | 0.09                | 0.007                         | 0.007                         | <0.05               | 0.000                         | 0.004                         |
| 1     | 4        | 0.09                | 0.007                         | 0.007                         | <0.05               | 0.000                         | 0.004                         |
| 1     | 5        | 0.07                | 0.006                         | 0.006                         | <0.05               | 0.000                         | 0.004                         |
| 1     | 6        | 0.11                | 0.009                         | 0.009                         | <0.05               | 0.000                         | 0.004                         |
| 1     | 7        | 0.10                | 0.008                         | 0.008                         | <0.05               | 0.000                         | 0.004                         |
| 1     | 8        | <0.06               | 0.000                         | 0.005                         | <0.05               | 0.000                         | 0.004                         |
| 2     | 1        | 0.08                | 0.006                         | 0.006                         | <0.05               | 0.000                         | 0.004                         |
| 2     | 2        | 0.10                | 0.008                         | 0.008                         | 0.13                | 0.010                         | 0.010                         |
| 2     | 3        | 0.06                | 0.005                         | 0.005                         | <0.05               | 0.000                         | 0.004                         |
| 2     | 4        | <0.06               | 0.000                         | 0.005                         | <0.05               | 0.000                         | 0.004                         |
| 2     | 5        | 0.09                | 0.007                         | 0.007                         | <0.05               | 0.000                         | 0.004                         |
| 2     | 6        | 0.08                | 0.006                         | 0.006                         | <0.05               | 0.000                         | 0.004                         |
| 2     | 7        | 0.09                | 0.007                         | 0.007                         | <0.05               | 0.000                         | 0.004                         |
| 2     | 8        | <0.06               | 0.000                         | 0.005                         | <0.05               | 0.000                         | 0.004                         |
| 3     | 1        | 0.11                | 0.009                         | 0.009                         | <0.05               | 0.000                         | 0.004                         |
| 3     | 2        | 0.09                | 0.007                         | 0.007                         | 0.08                | 0.007                         | 0.007                         |
| 3     | 3        | 0.07                | 0.006                         | 0.006                         | <0.05               | 0.000                         | 0.004                         |
| 3     | 4        | 0.08                | 0.006                         | 0.006                         | <0.05               | 0.000                         | 0.004                         |
| 3     | 5        | 0.17                | 0.014                         | 0.014                         | <0.05               | 0.000                         | 0.004                         |
| 3     | 6        | 0.12                | 0.010                         | 0.010                         | <0.05               | 0.000                         | 0.004                         |
| 3     | 7        | 0.07                | 0.005                         | 0.005                         | <0.05               | 0.000                         | 0.004                         |
| 3     | 8        | <0.06               | 0.000                         | 0.005                         | <0.05               | 0.000                         | 0.004                         |
| 4     | 1        | 0.14                | 0.011                         | 0.011                         | <0.05               | 0.000                         | 0.004                         |
| 4     | 2        | 0.07                | 0.006                         | 0.006                         | 0.09                | 0.008                         | 0.008                         |
| 4     | 3        | 0.07                | 0.005                         | 0.005                         | <0.05               | 0.000                         | 0.004                         |
| 4     | 4        | 0.10                | 0.008                         | 0.008                         | <0.05               | 0.000                         | 0.004                         |
| 4     | 5        | 0.08                | 0.006                         | 0.006                         | <0.05               | 0.000                         | 0.004                         |
| 4     | 6        | 0.10                | 0.008                         | 0.008                         | <0.05               | 0.000                         | 0.004                         |
| 4     | 7        | 0.15                | 0.012                         | 0.012                         | <0.05               | 0.000                         | 0.004                         |
| 4     | 8        | 0.05                | 0.004                         | 0.004                         | <0.05               | 0.000                         | 0.004                         |
| 5     | 1        | 0.09                | 0.007                         | 0.007                         | <0.05               | 0.000                         | 0.004                         |
| 5     | 2        | 0.07                | 0.006                         | 0.006                         | 0.11                | 0.009                         | 0.009                         |
| 5     | 3        | <0.06               | 0.000                         | 0.005                         | <0.05               | 0.000                         | 0.004                         |
| 5     | 4        | 0.09                | 0.007                         | 0.007                         | <0.05               | 0.000                         | 0.004                         |
| 5     | 5        | 0.09                | 0.007                         | 0.007                         | <0.05               | 0.000                         | 0.004                         |
| 5     | 6        | 0.07                | 0.006                         | 0.006                         | <0.05               | 0.000                         | 0.004                         |
| 5     | 7        | 0.07                | 0.006                         | 0.006                         | <0.05               | 0.000                         | 0.004                         |
| 5     | 8        | 0.06                | 0.005                         | 0.005                         | <0.05               | 0.000                         | 0.004                         |
|       |          |                     | Σ min                         | Σ max                         |                     | Σ min                         | Σ max                         |
| 1     |          |                     | 0.051                         | 0.056                         |                     | 0.149                         | 0.177                         |
| 2     |          |                     | 0.040                         | 0.049                         |                     | 0.010                         | 0.038                         |
| 3     |          |                     | 0.056                         | 0.061                         |                     | 0.007                         | 0.035                         |
| 4     |          |                     | 0.061                         | 0.061                         |                     | 0.008                         | 0.036                         |
| 5     |          |                     | 0.044                         | 0.049                         |                     | 0.009                         | 0.037                         |
| Mean  |          |                     | 0.050                         | 0.055                         |                     | 0.037                         | 0.065                         |
| SD    |          |                     | 0.009                         | 0.006                         |                     | 0.063                         | 0.063                         |

**Table B.** Continued Karbon Quartzite.

| Stone | Fraction | LAB 1<br>Cu<br>µg/l | min<br>r<br>mg/m <sup>2</sup> | max<br>r<br>mg/m <sup>2</sup> | LAB 2<br>Cu<br>µg/l | min<br>r<br>mg/m <sup>2</sup> | max<br>r<br>mg/m <sup>2</sup> |
|-------|----------|---------------------|-------------------------------|-------------------------------|---------------------|-------------------------------|-------------------------------|
| 1     | 1        | 2.097               | 0.168                         | 0.168                         | <0.06               | 0.000                         | 0.005                         |
| 1     | 2        | 2.833               | 0.227                         | 0.227                         | <0.06               | 0.000                         | 0.005                         |
| 1     | 3        | 2.052               | 0.164                         | 0.164                         | <0.06               | 0.000                         | 0.005                         |
| 1     | 4        | 2.235               | 0.179                         | 0.179                         | <0.06               | 0.000                         | 0.005                         |
| 1     | 5        | 2.396               | 0.192                         | 0.192                         | <0.06               | 0.000                         | 0.005                         |
| 1     | 6        | 2.486               | 0.199                         | 0.199                         | <0.06               | 0.000                         | 0.005                         |
| 1     | 7        | 4.372               | 0.350                         | 0.350                         | <0.06               | 0.000                         | 0.005                         |
| 1     | 8        | 1.578               | 0.126                         | 0.126                         | <0.06               | 0.000                         | 0.005                         |
| 2     | 1        | 1.116               | 0.089                         | 0.089                         | <0.06               | 0.000                         | 0.005                         |
| 2     | 2        | 2.550               | 0.204                         | 0.204                         | <0.06               | 0.000                         | 0.005                         |
| 2     | 3        | 1.681               | 0.134                         | 0.134                         | <0.06               | 0.000                         | 0.005                         |
| 2     | 4        | 1.007               | 0.081                         | 0.081                         | <0.06               | 0.000                         | 0.005                         |
| 2     | 5        | 2.840               | 0.227                         | 0.227                         | <0.06               | 0.000                         | 0.005                         |
| 2     | 6        | 1.659               | 0.133                         | 0.133                         | <0.06               | 0.000                         | 0.005                         |
| 2     | 7        | 2.694               | 0.216                         | 0.216                         | <0.06               | 0.000                         | 0.005                         |
| 2     | 8        | 1.276               | 0.102                         | 0.102                         | <0.06               | 0.000                         | 0.005                         |
| 3     | 1        | 4.513               | 0.361                         | 0.361                         | <0.06               | 0.000                         | 0.005                         |
| 3     | 2        | 3.236               | 0.259                         | 0.259                         | <0.06               | 0.000                         | 0.005                         |
| 3     | 3        | 1.958               | 0.157                         | 0.157                         | <0.06               | 0.000                         | 0.005                         |
| 3     | 4        | 1.375               | 0.110                         | 0.110                         | <0.06               | 0.000                         | 0.005                         |
| 3     | 5        | 3.459               | 0.277                         | 0.277                         | <0.06               | 0.000                         | 0.005                         |
| 3     | 6        | 2.314               | 0.185                         | 0.185                         | <0.06               | 0.000                         | 0.005                         |
| 3     | 7        | 1.804               | 0.144                         | 0.144                         | <0.06               | 0.000                         | 0.005                         |
| 3     | 8        | 1.803               | 0.144                         | 0.144                         | <0.06               | 0.000                         | 0.005                         |
| 4     | 1        | 7.607               | 0.609                         | 0.609                         | <0.06               | 0.000                         | 0.005                         |
| 4     | 2        | 3.973               | 0.318                         | 0.318                         | <0.06               | 0.000                         | 0.005                         |
| 4     | 3        | 3.043               | 0.243                         | 0.243                         | <0.06               | 0.000                         | 0.005                         |
| 4     | 4        | 3.016               | 0.241                         | 0.241                         | <0.06               | 0.000                         | 0.005                         |
| 4     | 5        | 3.632               | 0.291                         | 0.291                         | <0.06               | 0.000                         | 0.005                         |
| 4     | 6        | 3.491               | 0.279                         | 0.279                         | <0.06               | 0.000                         | 0.005                         |
| 4     | 7        | 3.114               | 0.249                         | 0.249                         | <0.06               | 0.000                         | 0.005                         |
| 4     | 8        | 3.330               | 0.266                         | 0.266                         | <0.06               | 0.000                         | 0.005                         |
| 5     | 1        | 1.767               | 0.141                         | 0.141                         | <0.06               | 0.000                         | 0.005                         |
| 5     | 2        | 2.220               | 0.178                         | 0.178                         | <0.06               | 0.000                         | 0.005                         |
| 5     | 3        | 0.819               | 0.065                         | 0.065                         | <0.06               | 0.000                         | 0.005                         |
| 5     | 4        | 2.106               | 0.168                         | 0.168                         | <0.06               | 0.000                         | 0.005                         |
| 5     | 5        | 2.731               | 0.218                         | 0.218                         | <0.06               | 0.000                         | 0.005                         |
| 5     | 6        | 2.313               | 0.185                         | 0.185                         | <0.06               | 0.000                         | 0.005                         |
| 5     | 7        | 1.891               | 0.151                         | 0.151                         | <0.06               | 0.000                         | 0.005                         |
| 5     | 8        | 1.921               | 0.154                         | 0.154                         | <0.06               | 0.000                         | 0.005                         |
|       |          |                     | Σ min                         | Σ max                         |                     | Σ min                         | Σ max                         |
| 1     |          |                     | 1.604                         | 1.604                         |                     | 0.000                         | 0.038                         |
| 2     |          |                     | 1.186                         | 1.186                         |                     | 0.000                         | 0.038                         |
| 3     |          |                     | 1.637                         | 1.637                         |                     | 0.000                         | 0.038                         |
| 4     |          |                     | 2.496                         | 2.496                         |                     | 0.000                         | 0.038                         |
| 5     |          |                     | 1.261                         | 1.261                         |                     | 0.000                         | 0.038                         |
| Mean  |          |                     | 1.637                         | 1.637                         |                     | 0.000                         | 0.038                         |
| SD    |          |                     | 0.521                         | 0.521                         |                     | 0.000                         | 0.000                         |

**Table B.** Continued Karbon Quartzite.

| Stone | Fraction | LAB 1<br>Mn<br>µg/l | min<br>r<br>mg/m <sup>2</sup> | max<br>r<br>mg/m <sup>2</sup> | LAB 2<br>Mn<br>µg/l | min<br>r<br>mg/m <sup>2</sup> | max<br>r<br>mg/m <sup>2</sup> |
|-------|----------|---------------------|-------------------------------|-------------------------------|---------------------|-------------------------------|-------------------------------|
| 1     | 1        | 3.86                | 0.31                          | 0.31                          | 0.43                | 0.03                          | 0.03                          |
| 1     | 2        | 0.31                | 0.02                          | 0.02                          | 1.16                | 0.09                          | 0.09                          |
| 1     | 3        | 0.34                | 0.03                          | 0.03                          | 0.33                | 0.03                          | 0.03                          |
| 1     | 4        | 0.35                | 0.03                          | 0.03                          | 0.55                | 0.04                          | 0.04                          |
| 1     | 5        | 0.36                | 0.03                          | 0.03                          | 0.39                | 0.03                          | 0.03                          |
| 1     | 6        | 0.53                | 0.04                          | 0.04                          | 0.46                | 0.04                          | 0.04                          |
| 1     | 7        | 4.16                | 0.33                          | 0.33                          | 0.56                | 0.04                          | 0.04                          |
| 1     | 8        | 8.27                | 0.66                          | 0.66                          | 0.56                | 0.04                          | 0.04                          |
| 2     | 1        | 5.96                | 0.48                          | 0.48                          | 3.79                | 0.30                          | 0.30                          |
| 2     | 2        | 0.40                | 0.03                          | 0.03                          | 5.96                | 0.48                          | 0.48                          |
| 2     | 3        | 0.31                | 0.02                          | 0.02                          | 8.32                | 0.66                          | 0.66                          |
| 2     | 4        | 0.83                | 0.07                          | 0.07                          | 12.03               | 0.96                          | 0.96                          |
| 2     | 5        | 0.51                | 0.04                          | 0.04                          | 26.41               | 2.11                          | 2.11                          |
| 2     | 6        | 0.89                | 0.07                          | 0.07                          | 31.41               | 2.51                          | 2.51                          |
| 2     | 7        | 1.11                | 0.09                          | 0.09                          | 61.32               | 4.90                          | 4.90                          |
| 2     | 8        | 1.81                | 0.14                          | 0.14                          | 59.52               | 4.76                          | 4.76                          |
| 3     | 1        | 4.97                | 0.40                          | 0.40                          | 1.78                | 0.14                          | 0.14                          |
| 3     | 2        | 0.78                | 0.06                          | 0.06                          | 0.57                | 0.05                          | 0.05                          |
| 3     | 3        | 2.45                | 0.20                          | 0.20                          | 0.25                | 0.02                          | 0.02                          |
| 3     | 4        | 2.76                | 0.22                          | 0.22                          | 0.28                | 0.02                          | 0.02                          |
| 3     | 5        | 2.34                | 0.19                          | 0.19                          | 0.63                | 0.05                          | 0.05                          |
| 3     | 6        | 3.03                | 0.24                          | 0.24                          | 1.42                | 0.11                          | 0.11                          |
| 3     | 7        | 3.45                | 0.28                          | 0.28                          | 4.06                | 0.32                          | 0.32                          |
| 3     | 8        | 3.78                | 0.30                          | 0.30                          | 5.24                | 0.42                          | 0.42                          |
| 4     | 1        | 6.76                | 0.54                          | 0.54                          | 0.36                | 0.03                          | 0.03                          |
| 4     | 2        | 0.56                | 0.04                          | 0.04                          | 2.31                | 0.18                          | 0.18                          |
| 4     | 3        | 0.31                | 0.02                          | 0.02                          | 1.05                | 0.08                          | 0.08                          |
| 4     | 4        | 0.48                | 0.04                          | 0.04                          | 1.28                | 0.10                          | 0.10                          |
| 4     | 5        | 0.38                | 0.03                          | 0.03                          | 1.13                | 0.09                          | 0.09                          |
| 4     | 6        | 0.53                | 0.04                          | 0.04                          | 1.28                | 0.10                          | 0.10                          |
| 4     | 7        | 2.32                | 0.19                          | 0.19                          | 1.36                | 0.11                          | 0.11                          |
| 4     | 8        | 4.52                | 0.36                          | 0.36                          | 1.33                | 0.11                          | 0.11                          |
| 5     | 1        | 7.27                | 0.58                          | 0.58                          | 0.61                | 0.05                          | 0.05                          |
| 5     | 2        | 0.57                | 0.05                          | 0.05                          | 0.47                | 0.04                          | 0.04                          |
| 5     | 3        | 2.19                | 0.17                          | 0.17                          | 0.22                | 0.02                          | 0.02                          |
| 5     | 4        | 1.07                | 0.09                          | 0.09                          | 0.22                | 0.02                          | 0.02                          |
| 5     | 5        | 4.61                | 0.37                          | 0.37                          | 0.39                | 0.03                          | 0.03                          |
| 5     | 6        | 8.60                | 0.69                          | 0.69                          | 0.30                | 0.02                          | 0.02                          |
| 5     | 7        | 22.52               | 1.80                          | 1.80                          | 0.75                | 0.06                          | 0.06                          |
| 5     | 8        | 32.70               | 2.62                          | 2.62                          | 0.93                | 0.07                          | 0.07                          |
|       |          |                     | Σ min                         | Σ max                         |                     | Σ min                         | Σ max                         |
| 1     |          |                     | 1.45                          | 1.45                          |                     | 0.36                          | 0.36                          |
| 2     |          |                     | 0.95                          | 0.95                          |                     | 16.69                         | 16.69                         |
| 3     |          |                     | 1.88                          | 1.88                          |                     | 1.14                          | 1.14                          |
| 4     |          |                     | 1.27                          | 1.27                          |                     | 0.81                          | 0.81                          |
| 5     |          |                     | 6.36                          | 6.36                          |                     | 0.31                          | 0.31                          |
| Mean  |          |                     | 2.38                          | 2.38                          |                     | 3.86                          | 3.86                          |
| SD    |          |                     | 2.25                          | 2.25                          |                     | 7.18                          | 7.18                          |

**Table B.** Continued Karbon Quartzite.

| Stone | Fraction | LAB 1<br>Mo<br>µg/l | min<br>r<br>mg/m <sup>2</sup> | max<br>r<br>mg/m <sup>2</sup> | LAB 2<br>Mo<br>µg/l | min<br>r<br>mg/m <sup>2</sup> | max<br>r<br>mg/m <sup>2</sup> |
|-------|----------|---------------------|-------------------------------|-------------------------------|---------------------|-------------------------------|-------------------------------|
| 1     | 1        | 0.080               | 0.006                         | 0.006                         | <0.07               | 0.000                         | 0.006                         |
| 1     | 2        | 0.061               | 0.005                         | 0.005                         | 0.26                | 0.021                         | 0.021                         |
| 1     | 3        | 0.057               | 0.005                         | 0.005                         | <0.07               | 0.000                         | 0.006                         |
| 1     | 4        | <0.06               | 0.000                         | 0.005                         | <0.07               | 0.000                         | 0.006                         |
| 1     | 5        | 0.059               | 0.005                         | 0.005                         | <0.07               | 0.000                         | 0.006                         |
| 1     | 6        | 0.069               | 0.006                         | 0.006                         | <0.07               | 0.000                         | 0.006                         |
| 1     | 7        | 0.060               | 0.005                         | 0.005                         | <0.07               | 0.000                         | 0.006                         |
| 1     | 8        | <0.06               | 0.000                         | 0.005                         | <0.07               | 0.000                         | 0.006                         |
| 2     | 1        | 0.197               | 0.016                         | 0.016                         | <0.07               | 0.000                         | 0.006                         |
| 2     | 2        | 0.185               | 0.015                         | 0.015                         | 0.07                | 0.005                         | 0.005                         |
| 2     | 3        | 0.104               | 0.008                         | 0.008                         | <0.07               | 0.000                         | 0.006                         |
| 2     | 4        | <0.06               | 0.000                         | 0.005                         | <0.07               | 0.000                         | 0.006                         |
| 2     | 5        | <0.06               | 0.000                         | 0.005                         | <0.07               | 0.000                         | 0.006                         |
| 2     | 6        | <0.06               | 0.000                         | 0.005                         | <0.07               | 0.000                         | 0.006                         |
| 2     | 7        | 0.062               | 0.005                         | 0.005                         | <0.07               | 0.000                         | 0.006                         |
| 2     | 8        | 0.089               | 0.007                         | 0.007                         | <0.07               | 0.000                         | 0.006                         |
| 3     | 1        | <0.06               | 0.000                         | 0.005                         | <0.07               | 0.000                         | 0.006                         |
| 3     | 2        | 0.067               | 0.005                         | 0.005                         | <0.07               | 0.000                         | 0.006                         |
| 3     | 3        | <0.06               | 0.000                         | 0.005                         | <0.07               | 0.000                         | 0.006                         |
| 3     | 4        | <0.06               | 0.000                         | 0.005                         | <0.07               | 0.000                         | 0.006                         |
| 3     | 5        | 0.079               | 0.006                         | 0.006                         | <0.07               | 0.000                         | 0.006                         |
| 3     | 6        | 0.067               | 0.005                         | 0.005                         | <0.07               | 0.000                         | 0.006                         |
| 3     | 7        | <0.06               | 0.000                         | 0.005                         | <0.07               | 0.000                         | 0.006                         |
| 3     | 8        | 0.077               | 0.006                         | 0.006                         | <0.07               | 0.000                         | 0.006                         |
| 4     | 1        | <0.06               | 0.000                         | 0.005                         | <0.07               | 0.000                         | 0.006                         |
| 4     | 2        | <0.06               | 0.000                         | 0.005                         | <0.07               | 0.000                         | 0.006                         |
| 4     | 3        | <0.06               | 0.000                         | 0.005                         | <0.07               | 0.000                         | 0.006                         |
| 4     | 4        | <0.06               | 0.000                         | 0.005                         | <0.07               | 0.000                         | 0.006                         |
| 4     | 5        | <0.06               | 0.000                         | 0.005                         | <0.07               | 0.000                         | 0.006                         |
| 4     | 6        | <0.06               | 0.000                         | 0.005                         | <0.07               | 0.000                         | 0.006                         |
| 4     | 7        | <0.06               | 0.000                         | 0.005                         | <0.07               | 0.000                         | 0.006                         |
| 4     | 8        | <0.06               | 0.000                         | 0.005                         | <0.07               | 0.000                         | 0.006                         |
| 5     | 1        | 0.077               | 0.006                         | 0.006                         | <0.07               | 0.000                         | 0.006                         |
| 5     | 2        | <0.06               | 0.000                         | 0.005                         | <0.07               | 0.000                         | 0.006                         |
| 5     | 3        | <0.06               | 0.000                         | 0.005                         | <0.07               | 0.000                         | 0.006                         |
| 5     | 4        | <0.06               | 0.000                         | 0.005                         | <0.07               | 0.000                         | 0.006                         |
| 5     | 5        | <0.06               | 0.000                         | 0.005                         | <0.07               | 0.000                         | 0.006                         |
| 5     | 6        | <0.06               | 0.000                         | 0.005                         | <0.07               | 0.000                         | 0.006                         |
| 5     | 7        | <0.06               | 0.000                         | 0.005                         | <0.07               | 0.000                         | 0.006                         |
| 5     | 8        | <0.06               | 0.000                         | 0.005                         | <0.07               | 0.000                         | 0.006                         |
|       |          |                     | Σ min                         | Σ max                         |                     | Σ min                         | Σ max                         |
| 1     |          |                     | 0.031                         | 0.040                         |                     | 0.021                         | 0.060                         |
| 2     |          |                     | 0.051                         | 0.065                         |                     | 0.005                         | 0.045                         |
| 3     |          |                     | 0.023                         | 0.042                         |                     | 0.000                         | 0.045                         |
| 4     |          |                     | 0.000                         | 0.038                         |                     | 0.000                         | 0.045                         |
| 5     |          |                     | 0.006                         | 0.040                         |                     | 0.000                         | 0.045                         |
| Mean  |          |                     | 0.022                         | 0.045                         |                     | 0.005                         | 0.048                         |
| SD    |          |                     | 0.020                         | 0.011                         |                     | 0.009                         | 0.007                         |

**Table B.** Continued Karbon Quartzite.

| Stone | Fraction | LAB 1<br>Ni<br>µg/l | min<br>r<br>mg/m <sup>2</sup> | max<br>r<br>mg/m <sup>2</sup> | LAB 2<br>Ni<br>µg/l | min<br>r<br>mg/m <sup>2</sup> | max<br>r<br>mg/m <sup>2</sup> |
|-------|----------|---------------------|-------------------------------|-------------------------------|---------------------|-------------------------------|-------------------------------|
| 1     | 1        | 0.50                | 0.040                         | 0.040                         | <0.05               | 0.000                         | 0.004                         |
| 1     | 2        | 0.36                | 0.029                         | 0.029                         | 0.53                | 0.042                         | 0.042                         |
| 1     | 3        | 0.24                | 0.020                         | 0.020                         | <0.05               | 0.000                         | 0.004                         |
| 1     | 4        | 0.26                | 0.021                         | 0.021                         | <0.05               | 0.000                         | 0.004                         |
| 1     | 5        | 0.28                | 0.022                         | 0.022                         | <0.05               | 0.000                         | 0.004                         |
| 1     | 6        | 0.38                | 0.030                         | 0.030                         | <0.05               | 0.000                         | 0.004                         |
| 1     | 7        | 1.13                | 0.091                         | 0.091                         | <0.05               | 0.000                         | 0.004                         |
| 1     | 8        | 1.40                | 0.112                         | 0.112                         | <0.05               | 0.000                         | 0.004                         |
| 2     | 1        | 0.26                | 0.021                         | 0.021                         | 0.18                | 0.014                         | 0.014                         |
| 2     | 2        | 0.37                | 0.029                         | 0.029                         | 0.11                | 0.009                         | 0.009                         |
| 2     | 3        | 0.23                | 0.019                         | 0.019                         | 0.09                | 0.007                         | 0.007                         |
| 2     | 4        | 0.11                | 0.009                         | 0.009                         | 0.08                | 0.007                         | 0.007                         |
| 2     | 5        | 0.33                | 0.027                         | 0.027                         | 0.16                | 0.013                         | 0.013                         |
| 2     | 6        | 0.35                | 0.028                         | 0.028                         | 0.22                | 0.018                         | 0.018                         |
| 2     | 7        | 0.41                | 0.033                         | 0.033                         | 0.51                | 0.000                         | 0.040                         |
| 2     | 8        | 0.41                | 0.033                         | 0.033                         | 0.54                | 0.000                         | 0.043                         |
| 3     | 1        | 1.74                | 0.139                         | 0.139                         | 0.10                | 0.008                         | 0.008                         |
| 3     | 2        | 0.74                | 0.059                         | 0.059                         | <0.05               | 0.000                         | 0.004                         |
| 3     | 3        | 0.29                | 0.023                         | 0.023                         | <0.05               | 0.000                         | 0.004                         |
| 3     | 4        | 0.21                | 0.017                         | 0.017                         | <0.05               | 0.000                         | 0.004                         |
| 3     | 5        | 0.41                | 0.033                         | 0.033                         | <0.05               | 0.000                         | 0.004                         |
| 3     | 6        | 0.46                | 0.037                         | 0.037                         | 0.08                | 0.007                         | 0.007                         |
| 3     | 7        | 0.30                | 0.024                         | 0.024                         | 0.24                | 0.020                         | 0.020                         |
| 3     | 8        | 0.75                | 0.060                         | 0.060                         | 0.31                | 0.000                         | 0.025                         |
| 4     | 1        | 2.19                | 0.175                         | 0.175                         | <0.05               | 0.000                         | 0.004                         |
| 4     | 2        | 0.63                | 0.051                         | 0.051                         | <0.05               | 0.000                         | 0.004                         |
| 4     | 3        | 0.26                | 0.021                         | 0.021                         | <0.05               | 0.000                         | 0.004                         |
| 4     | 4        | 0.37                | 0.030                         | 0.030                         | <0.05               | 0.000                         | 0.004                         |
| 4     | 5        | 0.32                | 0.026                         | 0.026                         | <0.05               | 0.000                         | 0.004                         |
| 4     | 6        | 0.41                | 0.033                         | 0.033                         | <0.05               | 0.000                         | 0.004                         |
| 4     | 7        | 0.70                | 0.056                         | 0.056                         | <0.05               | 0.000                         | 0.004                         |
| 4     | 8        | 1.33                | 0.107                         | 0.107                         | <0.05               | 0.000                         | 0.004                         |
| 5     | 1        | 0.82                | 0.066                         | 0.066                         | <0.05               | 0.000                         | 0.004                         |
| 5     | 2        | 0.47                | 0.038                         | 0.038                         | <0.05               | 0.000                         | 0.004                         |
| 5     | 3        | 0.24                | 0.020                         | 0.020                         | <0.05               | 0.000                         | 0.004                         |
| 5     | 4        | 0.37                | 0.029                         | 0.029                         | <0.05               | 0.000                         | 0.004                         |
| 5     | 5        | 0.61                | 0.049                         | 0.049                         | <0.05               | 0.000                         | 0.004                         |
| 5     | 6        | 0.95                | 0.076                         | 0.076                         | <0.05               | 0.000                         | 0.004                         |
| 5     | 7        | 1.74                | 0.139                         | 0.139                         | <0.05               | 0.000                         | 0.004                         |
| 5     | 8        | 2.33                | 0.186                         | 0.186                         | <0.05               | 0.000                         | 0.004                         |
|       |          |                     | Σ min                         | Σ max                         |                     | Σ min                         | Σ max                         |
| 1     |          |                     | 0.365                         | 0.365                         |                     | 0.042                         | 0.070                         |
| 2     |          |                     | 0.198                         | 0.198                         |                     | 0.068                         | 0.152                         |
| 3     |          |                     | 0.391                         | 0.391                         |                     | 0.034                         | 0.075                         |
| 4     |          |                     | 0.499                         | 0.499                         |                     | 0.000                         | 0.032                         |
| 5     |          |                     | 0.603                         | 0.603                         |                     | 0.000                         | 0.032                         |
| Mean  |          |                     | 0.411                         | 0.411                         |                     | 0.029                         | 0.072                         |
| SD    |          |                     | 0.152                         | 0.152                         |                     | 0.029                         | 0.049                         |

**Table B.** Continued Karbon Quartzite.

| Stone | Fraction | LAB 1<br>Pb<br>µg/l | min<br>r<br>mg/m <sup>2</sup> | max<br>r<br>mg/m <sup>2</sup> | LAB 2<br>Pb<br>µg/l | min<br>r<br>mg/m <sup>2</sup> | max<br>r<br>mg/m <sup>2</sup> |
|-------|----------|---------------------|-------------------------------|-------------------------------|---------------------|-------------------------------|-------------------------------|
| 1     | 1        | 0.30                | 0.024                         | 0.024                         | 0.01                | 0.001                         | 0.001                         |
| 1     | 2        | 0.08                | 0.007                         | 0.007                         | <0.01               | 0.000                         | 0.001                         |
| 1     | 3        | 0.12                | 0.009                         | 0.009                         | <0.01               | 0.000                         | 0.001                         |
| 1     | 4        | 0.15                | 0.012                         | 0.012                         | <0.01               | 0.000                         | 0.001                         |
| 1     | 5        | 0.15                | 0.012                         | 0.012                         | <0.01               | 0.000                         | 0.001                         |
| 1     | 6        | 0.21                | 0.017                         | 0.017                         | <0.01               | 0.000                         | 0.001                         |
| 1     | 7        | 0.16                | 0.013                         | 0.013                         | <0.01               | 0.000                         | 0.001                         |
| 1     | 8        | 0.02                | 0.001                         | 0.001                         | <0.01               | 0.000                         | 0.001                         |
| 2     | 1        | 0.12                | 0.010                         | 0.010                         | <0.01               | 0.000                         | 0.001                         |
| 2     | 2        | 0.06                | 0.005                         | 0.005                         | <0.01               | 0.000                         | 0.001                         |
| 2     | 3        | 0.07                | 0.005                         | 0.005                         | <0.01               | 0.000                         | 0.001                         |
| 2     | 4        | 0.13                | 0.010                         | 0.010                         | <0.01               | 0.000                         | 0.001                         |
| 2     | 5        | 0.09                | 0.007                         | 0.007                         | <0.01               | 0.000                         | 0.001                         |
| 2     | 6        | 0.08                | 0.007                         | 0.007                         | <0.01               | 0.000                         | 0.001                         |
| 2     | 7        | 0.09                | 0.007                         | 0.007                         | <0.01               | 0.000                         | 0.001                         |
| 2     | 8        | 0.04                | 0.003                         | 0.003                         | <0.01               | 0.000                         | 0.001                         |
| 3     | 1        | 0.24                | 0.019                         | 0.019                         | <0.01               | 0.000                         | 0.001                         |
| 3     | 2        | 0.08                | 0.007                         | 0.007                         | <0.01               | 0.000                         | 0.001                         |
| 3     | 3        | 0.17                | 0.013                         | 0.013                         | <0.01               | 0.000                         | 0.001                         |
| 3     | 4        | 0.29                | 0.023                         | 0.023                         | <0.01               | 0.000                         | 0.001                         |
| 3     | 5        | 0.43                | 0.034                         | 0.034                         | <0.01               | 0.000                         | 0.001                         |
| 3     | 6        | 0.26                | 0.021                         | 0.021                         | <0.01               | 0.000                         | 0.001                         |
| 3     | 7        | 0.12                | 0.009                         | 0.009                         | <0.01               | 0.000                         | 0.001                         |
| 3     | 8        | < 0.03              | 0.000                         | 0.002                         | <0.01               | 0.000                         | 0.001                         |
| 4     | 1        | 0.51                | 0.041                         | 0.041                         | <0.01               | 0.000                         | 0.001                         |
| 4     | 2        | 0.07                | 0.006                         | 0.006                         | <0.01               | 0.000                         | 0.001                         |
| 4     | 3        | 0.12                | 0.010                         | 0.010                         | <0.01               | 0.000                         | 0.001                         |
| 4     | 4        | 0.12                | 0.009                         | 0.009                         | <0.01               | 0.000                         | 0.001                         |
| 4     | 5        | 0.10                | 0.008                         | 0.008                         | <0.01               | 0.000                         | 0.001                         |
| 4     | 6        | 0.11                | 0.009                         | 0.009                         | <0.01               | 0.000                         | 0.001                         |
| 4     | 7        | 0.05                | 0.004                         | 0.004                         | <0.01               | 0.000                         | 0.001                         |
| 4     | 8        | < 0.03              | 0.000                         | 0.002                         | <0.01               | 0.000                         | 0.001                         |
| 5     | 1        | 0.12                | 0.009                         | 0.009                         | <0.01               | 0.000                         | 0.001                         |
| 5     | 2        | 0.07                | 0.006                         | 0.006                         | <0.01               | 0.000                         | 0.001                         |
| 5     | 3        | 0.08                | 0.006                         | 0.006                         | <0.01               | 0.000                         | 0.001                         |
| 5     | 4        | 0.09                | 0.007                         | 0.007                         | <0.01               | 0.000                         | 0.001                         |
| 5     | 5        | 0.17                | 0.014                         | 0.014                         | <0.01               | 0.000                         | 0.001                         |
| 5     | 6        | 0.07                | 0.006                         | 0.006                         | <0.01               | 0.000                         | 0.001                         |
| 5     | 7        | 0.06                | 0.005                         | 0.005                         | <0.01               | 0.000                         | 0.001                         |
| 5     | 8        | 0.05                | 0.004                         | 0.004                         | <0.01               | 0.000                         | 0.001                         |
|       |          |                     | Σ min                         | Σ max                         |                     | Σ min                         | Σ max                         |
| 1     |          |                     | 0.095                         | 0.095                         |                     | 0.001                         | 0.006                         |
| 2     |          |                     | 0.055                         | 0.055                         |                     | 0.000                         | 0.006                         |
| 3     |          |                     | 0.127                         | 0.129                         |                     | 0.000                         | 0.006                         |
| 4     |          |                     | 0.086                         | 0.089                         |                     | 0.000                         | 0.006                         |
| 5     |          |                     | 0.056                         | 0.056                         |                     | 0.000                         | 0.006                         |
| Mean  |          |                     | 0.084                         | 0.085                         |                     | 0.000                         | 0.006                         |
| SD    |          |                     | 0.030                         | 0.031                         |                     | 0.000                         | 0.000                         |

**Table B.** Continued Karbon Quartzite.

| Stone | Fraction | LAB 1<br>Sb<br>µg/l | min<br>r<br>mg/m <sup>2</sup> | max<br>r<br>mg/m <sup>2</sup> | LAB 2<br>Sb<br>µg/l | min<br>r<br>mg/m <sup>2</sup> | max<br>r<br>mg/m <sup>2</sup> |
|-------|----------|---------------------|-------------------------------|-------------------------------|---------------------|-------------------------------|-------------------------------|
| 1     | 1        | 0.142               | 0.011                         | 0.011                         | <0.06               | 0.000                         | 0.005                         |
| 1     | 2        | 0.093               | 0.007                         | 0.007                         | <0.06               | 0.000                         | 0.005                         |
| 1     | 3        | 0.093               | 0.007                         | 0.007                         | <0.06               | 0.000                         | 0.005                         |
| 1     | 4        | 0.078               | 0.006                         | 0.006                         | <0.06               | 0.000                         | 0.005                         |
| 1     | 5        | 0.074               | 0.006                         | 0.006                         | <0.06               | 0.000                         | 0.005                         |
| 1     | 6        | 0.116               | 0.009                         | 0.009                         | <0.06               | 0.000                         | 0.005                         |
| 1     | 7        | 0.152               | 0.012                         | 0.012                         | <0.06               | 0.000                         | 0.005                         |
| 1     | 8        | 0.235               | 0.019                         | 0.019                         | <0.06               | 0.000                         | 0.005                         |
| 2     | 1        | <0.06               | 0.000                         | 0.005                         | <0.06               | 0.000                         | 0.005                         |
| 2     | 2        | 0.093               | 0.007                         | 0.007                         | <0.06               | 0.000                         | 0.005                         |
| 2     | 3        | 0.083               | 0.007                         | 0.007                         | <0.06               | 0.000                         | 0.005                         |
| 2     | 4        | <0.06               | 0.000                         | 0.005                         | <0.06               | 0.000                         | 0.005                         |
| 2     | 5        | 0.078               | 0.006                         | 0.006                         | <0.06               | 0.000                         | 0.005                         |
| 2     | 6        | 0.102               | 0.008                         | 0.008                         | <0.06               | 0.000                         | 0.005                         |
| 2     | 7        | 0.092               | 0.007                         | 0.007                         | <0.06               | 0.000                         | 0.005                         |
| 2     | 8        | 0.252               | 0.020                         | 0.020                         | <0.06               | 0.000                         | 0.005                         |
| 3     | 1        | <0.06               | 0.000                         | 0.005                         | <0.06               | 0.000                         | 0.005                         |
| 3     | 2        | 0.081               | 0.006                         | 0.006                         | <0.06               | 0.000                         | 0.005                         |
| 3     | 3        | <0.06               | 0.000                         | 0.005                         | <0.06               | 0.000                         | 0.005                         |
| 3     | 4        | <0.06               | 0.000                         | 0.005                         | <0.06               | 0.000                         | 0.005                         |
| 3     | 5        | 0.096               | 0.008                         | 0.008                         | <0.06               | 0.000                         | 0.005                         |
| 3     | 6        | 0.100               | 0.008                         | 0.008                         | <0.06               | 0.000                         | 0.005                         |
| 3     | 7        | 0.090               | 0.007                         | 0.007                         | <0.06               | 0.000                         | 0.005                         |
| 3     | 8        | 0.231               | 0.018                         | 0.018                         | <0.06               | 0.000                         | 0.005                         |
| 4     | 1        | <0.06               | 0.000                         | 0.005                         | <0.06               | 0.000                         | 0.005                         |
| 4     | 2        | 0.097               | 0.008                         | 0.008                         | <0.06               | 0.000                         | 0.005                         |
| 4     | 3        | 0.094               | 0.008                         | 0.008                         | <0.06               | 0.000                         | 0.005                         |
| 4     | 4        | 0.094               | 0.007                         | 0.007                         | <0.06               | 0.000                         | 0.005                         |
| 4     | 5        | 0.081               | 0.006                         | 0.006                         | <0.06               | 0.000                         | 0.005                         |
| 4     | 6        | 0.166               | 0.013                         | 0.013                         | <0.06               | 0.000                         | 0.005                         |
| 4     | 7        | 0.109               | 0.009                         | 0.009                         | <0.06               | 0.000                         | 0.005                         |
| 4     | 8        | 0.255               | 0.020                         | 0.020                         | <0.06               | 0.000                         | 0.005                         |
| 5     | 1        | <0.06               | 0.000                         | 0.005                         | <0.06               | 0.000                         | 0.005                         |
| 5     | 2        | 0.077               | 0.006                         | 0.006                         | <0.06               | 0.000                         | 0.005                         |
| 5     | 3        | <0.06               | 0.000                         | 0.005                         | <0.06               | 0.000                         | 0.005                         |
| 5     | 4        | 0.062               | 0.005                         | 0.005                         | <0.06               | 0.000                         | 0.005                         |
| 5     | 5        | 0.083               | 0.007                         | 0.007                         | <0.06               | 0.000                         | 0.005                         |
| 5     | 6        | 0.073               | 0.006                         | 0.006                         | <0.06               | 0.000                         | 0.005                         |
| 5     | 7        | 0.090               | 0.007                         | 0.007                         | <0.06               | 0.000                         | 0.005                         |
| 5     | 8        | 0.255               | 0.020                         | 0.020                         | <0.06               | 0.000                         | 0.005                         |
|       |          |                     | Σ min                         | Σ max                         |                     | Σ min                         | Σ max                         |
| 1     |          |                     | 0.079                         | 0.079                         |                     | 0.000                         | 0.038                         |
| 2     |          |                     | 0.056                         | 0.066                         |                     | 0.000                         | 0.038                         |
| 3     |          |                     | 0.048                         | 0.062                         |                     | 0.000                         | 0.038                         |
| 4     |          |                     | 0.072                         | 0.076                         |                     | 0.000                         | 0.038                         |
| 5     |          |                     | 0.051                         | 0.061                         |                     | 0.000                         | 0.038                         |
| Mean  |          |                     | 0.061                         | 0.069                         |                     | 0.000                         | 0.038                         |
| SD    |          |                     | 0.013                         | 0.008                         |                     | 0.000                         | 0.000                         |

**Table B.** Continued Karbon Quartzite.

| Stone | Fraction | LAB 1<br>Se<br>µg/l | min<br>r<br>mg/m <sup>2</sup> | max<br>r<br>mg/m <sup>2</sup> | LAB 2<br>Se<br>µg/l | min<br>r<br>mg/m <sup>2</sup> | max<br>r<br>mg/m <sup>2</sup> |
|-------|----------|---------------------|-------------------------------|-------------------------------|---------------------|-------------------------------|-------------------------------|
| 1     | 1        | 0.05                | 0.004                         | 0.004                         | <0.83               | 0.00                          | 0.07                          |
| 1     | 2        | <0.04               | 0.000                         | 0.003                         | <0.83               | 0.00                          | 0.07                          |
| 1     | 3        | <0.04               | 0.000                         | 0.003                         | <0.83               | 0.00                          | 0.07                          |
| 1     | 4        | <0.04               | 0.000                         | 0.003                         | <0.83               | 0.00                          | 0.07                          |
| 1     | 5        | <0.04               | 0.000                         | 0.003                         | <0.83               | 0.00                          | 0.07                          |
| 1     | 6        | 0.04                | 0.003                         | 0.003                         | <0.83               | 0.00                          | 0.07                          |
| 1     | 7        | <0.04               | 0.000                         | 0.003                         | <0.83               | 0.00                          | 0.07                          |
| 1     | 8        | <0.04               | 0.000                         | 0.003                         | <0.83               | 0.00                          | 0.07                          |
| 2     | 1        | <0.04               | 0.000                         | 0.003                         | <0.83               | 0.00                          | 0.07                          |
| 2     | 2        | <0.04               | 0.000                         | 0.003                         | <0.83               | 0.00                          | 0.07                          |
| 2     | 3        | <0.04               | 0.000                         | 0.003                         | <0.83               | 0.00                          | 0.07                          |
| 2     | 4        | <0.04               | 0.000                         | 0.003                         | <0.83               | 0.00                          | 0.07                          |
| 2     | 5        | <0.04               | 0.000                         | 0.003                         | <0.83               | 0.00                          | 0.07                          |
| 2     | 6        | <0.04               | 0.000                         | 0.003                         | <0.83               | 0.00                          | 0.07                          |
| 2     | 7        | <0.04               | 0.000                         | 0.003                         | <0.83               | 0.00                          | 0.07                          |
| 2     | 8        | <0.04               | 0.000                         | 0.003                         | <0.83               | 0.00                          | 0.07                          |
| 3     | 1        | <0.04               | 0.000                         | 0.003                         | <0.83               | 0.00                          | 0.07                          |
| 3     | 2        | <0.04               | 0.000                         | 0.003                         | <0.83               | 0.00                          | 0.07                          |
| 3     | 3        | <0.04               | 0.000                         | 0.003                         | <0.83               | 0.00                          | 0.07                          |
| 3     | 4        | <0.04               | 0.000                         | 0.003                         | <0.83               | 0.00                          | 0.07                          |
| 3     | 5        | <0.04               | 0.000                         | 0.003                         | <0.83               | 0.00                          | 0.07                          |
| 3     | 6        | <0.04               | 0.000                         | 0.003                         | <0.83               | 0.00                          | 0.07                          |
| 3     | 7        | <0.04               | 0.000                         | 0.003                         | <0.83               | 0.00                          | 0.07                          |
| 3     | 8        | <0.04               | 0.000                         | 0.003                         | <0.83               | 0.00                          | 0.07                          |
| 4     | 1        | 0.06                | 0.005                         | 0.005                         | <0.83               | 0.00                          | 0.07                          |
| 4     | 2        | 0.05                | 0.004                         | 0.004                         | <0.83               | 0.00                          | 0.07                          |
| 4     | 3        | <0.04               | 0.000                         | 0.003                         | <0.83               | 0.00                          | 0.07                          |
| 4     | 4        | 0.05                | 0.004                         | 0.004                         | <0.83               | 0.00                          | 0.07                          |
| 4     | 5        | 0.13                | 0.011                         | 0.011                         | <0.83               | 0.00                          | 0.07                          |
| 4     | 6        | 0.21                | 0.017                         | 0.017                         | <0.83               | 0.00                          | 0.07                          |
| 4     | 7        | 0.43                | 0.034                         | 0.034                         | <0.83               | 0.00                          | 0.07                          |
| 4     | 8        | 0.50                | 0.040                         | 0.040                         | <0.83               | 0.00                          | 0.07                          |
| 5     | 1        | 0.12                | 0.009                         | 0.009                         | <0.83               | 0.00                          | 0.07                          |
| 5     | 2        | 0.07                | 0.006                         | 0.006                         | <0.83               | 0.00                          | 0.07                          |
| 5     | 3        | 0.08                | 0.007                         | 0.007                         | <0.83               | 0.00                          | 0.07                          |
| 5     | 4        | 0.13                | 0.010                         | 0.010                         | <0.83               | 0.00                          | 0.07                          |
| 5     | 5        | 0.29                | 0.023                         | 0.023                         | <0.83               | 0.00                          | 0.07                          |
| 5     | 6        | 0.47                | 0.037                         | 0.037                         | <0.83               | 0.00                          | 0.07                          |
| 5     | 7        | 0.91                | 0.073                         | 0.073                         | <0.83               | 0.00                          | 0.07                          |
| 5     | 8        | 1.12                | 0.090                         | 0.090                         | <0.83               | 0.00                          | 0.07                          |
|       |          |                     | Σ min                         | Σ max                         |                     | Σ min                         | Σ max                         |
| 1     |          |                     | 0.008                         | 0.027                         |                     | 0.00                          | 0.53                          |
| 2     |          |                     | 0.000                         | 0.026                         |                     | 0.00                          | 0.53                          |
| 3     |          |                     | 0.000                         | 0.026                         |                     | 0.00                          | 0.53                          |
| 4     |          |                     | 0.114                         | 0.117                         |                     | 0.00                          | 0.53                          |
| 5     |          |                     | 0.255                         | 0.255                         |                     | 0.00                          | 0.53                          |
| Mean  |          |                     | 0.075                         | 0.090                         |                     | 0.00                          | 0.53                          |
| SD    |          |                     | 0.112                         | 0.100                         |                     | 0.00                          | 0.00                          |

**Table B.** Continued Karbon Quartzite.

| Stone | Fraction | LAB 1<br>Sn<br>µg/l | min<br>r<br>mg/m <sup>2</sup> | max<br>r<br>mg/m <sup>2</sup> | LAB 2<br>Sn<br>µg/l | min<br>r<br>mg/m <sup>2</sup> | max<br>r<br>mg/m <sup>2</sup> |
|-------|----------|---------------------|-------------------------------|-------------------------------|---------------------|-------------------------------|-------------------------------|
| 1     | 1        | 0.156               | 0.012                         | 0.012                         | <0.02               | 0.00                          | 0.002                         |
| 1     | 2        | 0.106               | 0.008                         | 0.008                         | <0.02               | 0.00                          | 0.002                         |
| 1     | 3        | 0.090               | 0.007                         | 0.007                         | <0.02               | 0.00                          | 0.002                         |
| 1     | 4        | 0.182               | 0.015                         | 0.015                         | <0.02               | 0.00                          | 0.002                         |
| 1     | 5        | 0.066               | 0.005                         | 0.005                         | <0.02               | 0.00                          | 0.002                         |
| 1     | 6        | 0.119               | 0.010                         | 0.010                         | <0.02               | 0.00                          | 0.002                         |
| 1     | 7        | 0.143               | 0.011                         | 0.011                         | <0.02               | 0.00                          | 0.002                         |
| 1     | 8        | 0.031               | 0.002                         | 0.002                         | <0.02               | 0.00                          | 0.002                         |
| 2     | 1        | 0.059               | 0.005                         | 0.005                         | <0.02               | 0.00                          | 0.002                         |
| 2     | 2        | 0.117               | 0.009                         | 0.009                         | <0.02               | 0.00                          | 0.002                         |
| 2     | 3        | 0.086               | 0.007                         | 0.007                         | <0.02               | 0.00                          | 0.002                         |
| 2     | 4        | 0.226               | 0.018                         | 0.018                         | <0.02               | 0.00                          | 0.002                         |
| 2     | 5        | 0.053               | 0.004                         | 0.004                         | <0.02               | 0.00                          | 0.002                         |
| 2     | 6        | 0.116               | 0.009                         | 0.009                         | <0.02               | 0.00                          | 0.002                         |
| 2     | 7        | 0.037               | 0.003                         | 0.003                         | <0.02               | 0.00                          | 0.002                         |
| 2     | 8        | <0.03               | 0.000                         | 0.002                         | <0.02               | 0.00                          | 0.002                         |
| 3     | 1        | 0.114               | 0.009                         | 0.009                         | <0.02               | 0.00                          | 0.002                         |
| 3     | 2        | 0.465               | 0.037                         | 0.037                         | <0.02               | 0.00                          | 0.002                         |
| 3     | 3        | 0.236               | 0.019                         | 0.019                         | <0.02               | 0.00                          | 0.002                         |
| 3     | 4        | 0.254               | 0.020                         | 0.020                         | <0.02               | 0.00                          | 0.002                         |
| 3     | 5        | 0.133               | 0.011                         | 0.011                         | <0.02               | 0.00                          | 0.002                         |
| 3     | 6        | 0.185               | 0.015                         | 0.015                         | <0.02               | 0.00                          | 0.002                         |
| 3     | 7        | 0.064               | 0.005                         | 0.005                         | <0.02               | 0.00                          | 0.002                         |
| 3     | 8        | <0.03               | 0.000                         | 0.002                         | <0.02               | 0.00                          | 0.002                         |
| 4     | 1        | 0.117               | 0.009                         | 0.009                         | <0.02               | 0.00                          | 0.002                         |
| 4     | 2        | 0.139               | 0.011                         | 0.011                         | <0.02               | 0.00                          | 0.002                         |
| 4     | 3        | 0.121               | 0.010                         | 0.010                         | <0.02               | 0.00                          | 0.002                         |
| 4     | 4        | 0.179               | 0.014                         | 0.014                         | <0.02               | 0.00                          | 0.002                         |
| 4     | 5        | 0.087               | 0.007                         | 0.007                         | <0.02               | 0.00                          | 0.002                         |
| 4     | 6        | 0.149               | 0.012                         | 0.012                         | <0.02               | 0.00                          | 0.002                         |
| 4     | 7        | 0.081               | 0.007                         | 0.007                         | <0.02               | 0.00                          | 0.002                         |
| 4     | 8        | 0.031               | 0.002                         | 0.002                         | <0.02               | 0.00                          | 0.002                         |
| 5     | 1        | 0.051               | 0.004                         | 0.004                         | <0.02               | 0.00                          | 0.002                         |
| 5     | 2        | 0.149               | 0.012                         | 0.012                         | <0.02               | 0.00                          | 0.002                         |
| 5     | 3        | 0.089               | 0.007                         | 0.007                         | <0.02               | 0.00                          | 0.002                         |
| 5     | 4        | 0.221               | 0.018                         | 0.018                         | <0.02               | 0.00                          | 0.002                         |
| 5     | 5        | 0.059               | 0.005                         | 0.005                         | <0.02               | 0.00                          | 0.002                         |
| 5     | 6        | 0.118               | 0.009                         | 0.009                         | <0.02               | 0.00                          | 0.002                         |
| 5     | 7        | 0.050               | 0.004                         | 0.004                         | <0.02               | 0.00                          | 0.002                         |
| 5     | 8        | 0.019               | 0.002                         | 0.002                         | <0.02               | 0.00                          | 0.002                         |
|       |          |                     | Σ min                         | Σ max                         |                     | Σ min                         | Σ max                         |
| 1     |          |                     | 0.071                         | 0.071                         |                     | 0.00                          | 0.013                         |
| 2     |          |                     | 0.056                         | 0.058                         |                     | 0.00                          | 0.013                         |
| 3     |          |                     | 0.116                         | 0.118                         |                     | 0.00                          | 0.013                         |
| 4     |          |                     | 0.072                         | 0.072                         |                     | 0.00                          | 0.013                         |
| 5     |          |                     | 0.060                         | 0.060                         |                     | 0.00                          | 0.013                         |
| Mean  |          |                     | 0.075                         | 0.076                         |                     | 0.00                          | 0.013                         |
| SD    |          |                     | 0.024                         | 0.025                         |                     | 0.00                          | 0.000                         |

**Table B.** Continued Karbon Quartzite.

| Stone | Fraction | LAB 1<br>Sr<br>µg/l | min<br>r<br>mg/m <sup>2</sup> | max<br>r<br>mg/m <sup>2</sup> | LAB 2<br>Sr<br>µg/l | min<br>r<br>mg/m <sup>2</sup> | max<br>r<br>mg/m <sup>2</sup> |
|-------|----------|---------------------|-------------------------------|-------------------------------|---------------------|-------------------------------|-------------------------------|
| 1     | 1        | <0.71               | 0.00                          | 0.06                          | <0.71               | 0.00                          | 0.06                          |
| 1     | 2        | 6.05                | 0.48                          | 0.48                          | <0.71               | 0.00                          | 0.06                          |
| 1     | 3        | 6.13                | 0.49                          | 0.49                          | <0.71               | 0.00                          | 0.06                          |
| 1     | 4        | 7.02                | 0.56                          | 0.56                          | <0.71               | 0.00                          | 0.06                          |
| 1     | 5        | 6.45                | 0.52                          | 0.52                          | <0.71               | 0.00                          | 0.06                          |
| 1     | 6        | 6.73                | 0.54                          | 0.54                          | <0.71               | 0.00                          | 0.06                          |
| 1     | 7        | 7.77                | 0.62                          | 0.62                          | 0.74                | 0.06                          | 0.06                          |
| 1     | 8        | 6.72                | 0.54                          | 0.54                          | 0.72                | 0.06                          | 0.06                          |
| 2     | 1        | <0.71               | 0.00                          | 0.06                          | <0.71               | 0.00                          | 0.06                          |
| 2     | 2        | 6.49                | 0.52                          | 0.52                          | <0.71               | 0.00                          | 0.06                          |
| 2     | 3        | 6.37                | 0.51                          | 0.51                          | <0.71               | 0.00                          | 0.06                          |
| 2     | 4        | 0.85                | 0.07                          | 0.07                          | <0.71               | 0.00                          | 0.06                          |
| 2     | 5        | 6.92                | 0.55                          | 0.55                          | 1.03                | 0.08                          | 0.08                          |
| 2     | 6        | 6.51                | 0.52                          | 0.52                          | 1.18                | 0.09                          | 0.09                          |
| 2     | 7        | 7.66                | 0.61                          | 0.61                          | 2.09                | 0.17                          | 0.17                          |
| 2     | 8        | 6.37                | 0.51                          | 0.51                          | 2.11                | 0.17                          | 0.17                          |
| 3     | 1        | <0.71               | 0.00                          | 0.06                          | <0.71               | 0.00                          | 0.06                          |
| 3     | 2        | 6.95                | 0.56                          | 0.56                          | <0.71               | 0.00                          | 0.06                          |
| 3     | 3        | <0.71               | 0.00                          | 0.06                          | <0.71               | 0.00                          | 0.06                          |
| 3     | 4        | 0.73                | 0.06                          | 0.06                          | <0.71               | 0.00                          | 0.06                          |
| 3     | 5        | 8.55                | 0.68                          | 0.68                          | <0.71               | 0.00                          | 0.06                          |
| 3     | 6        | 8.25                | 0.66                          | 0.66                          | <0.71               | 0.00                          | 0.06                          |
| 3     | 7        | 8.66                | 0.69                          | 0.69                          | <0.71               | 0.00                          | 0.06                          |
| 3     | 8        | 7.38                | 0.59                          | 0.59                          | <0.71               | 0.00                          | 0.06                          |
| 4     | 1        | 1.45                | 0.12                          | 0.12                          | <0.71               | 0.00                          | 0.06                          |
| 4     | 2        | 7.76                | 0.62                          | 0.62                          | <0.71               | 0.00                          | 0.06                          |
| 4     | 3        | 6.67                | 0.53                          | 0.53                          | <0.71               | 0.00                          | 0.06                          |
| 4     | 4        | 7.43                | 0.59                          | 0.59                          | <0.71               | 0.00                          | 0.06                          |
| 4     | 5        | 7.00                | 0.56                          | 0.56                          | <0.71               | 0.00                          | 0.06                          |
| 4     | 6        | 7.56                | 0.60                          | 0.60                          | <0.71               | 0.00                          | 0.06                          |
| 4     | 7        | 7.42                | 0.59                          | 0.59                          | 0.83                | 0.07                          | 0.07                          |
| 4     | 8        | 6.75                | 0.54                          | 0.54                          | 0.89                | 0.07                          | 0.07                          |
| 5     | 1        | <0.71               | 0.00                          | 0.06                          | <0.71               | 0.00                          | 0.06                          |
| 5     | 2        | 6.58                | 0.53                          | 0.53                          | <0.71               | 0.00                          | 0.06                          |
| 5     | 3        | <0.71               | 0.00                          | 0.06                          | <0.71               | 0.00                          | 0.06                          |
| 5     | 4        | 6.64                | 0.53                          | 0.53                          | <0.71               | 0.00                          | 0.06                          |
| 5     | 5        | 7.42                | 0.59                          | 0.59                          | <0.71               | 0.00                          | 0.06                          |
| 5     | 6        | 7.96                | 0.64                          | 0.64                          | <0.71               | 0.00                          | 0.06                          |
| 5     | 7        | 8.36                | 0.67                          | 0.67                          | <0.71               | 0.00                          | 0.06                          |
| 5     | 8        | 7.74                | 0.62                          | 0.62                          | <0.71               | 0.00                          | 0.06                          |
|       |          |                     | Σ min                         | Σ max                         |                     | Σ min                         | Σ max                         |
| 1     |          |                     | 3.75                          | 3.81                          |                     | 0.12                          | 0.46                          |
| 2     |          |                     | 3.29                          | 3.35                          |                     | 0.51                          | 0.74                          |
| 3     |          |                     | 3.24                          | 3.36                          |                     | 0.00                          | 0.45                          |
| 4     |          |                     | 4.16                          | 4.16                          |                     | 0.14                          | 0.48                          |
| 5     |          |                     | 3.58                          | 3.69                          |                     | 0.00                          | 0.45                          |
| Mean  |          |                     | 3.60                          | 3.67                          |                     | 0.15                          | 0.52                          |
| SD    |          |                     | 0.37                          | 0.34                          |                     | 0.21                          | 0.13                          |

**Table B.** Continued Karbon Quartzite:

| Stone | Fraction | LAB 1<br>U<br>µg/l | min<br>r<br>mg/m <sup>2</sup> | max<br>r<br>mg/m <sup>2</sup> | LAB 2<br>U<br>µg/l | min<br>r<br>mg/m <sup>2</sup> | max<br>r<br>mg/m <sup>2</sup> |
|-------|----------|--------------------|-------------------------------|-------------------------------|--------------------|-------------------------------|-------------------------------|
| 1     | 1        | 0.09               | 0.007                         | 0.007                         | <0.01              | 0.000                         | 0.001                         |
| 1     | 2        | <0.04              | 0.000                         | 0.003                         | <0.01              | 0.000                         | 0.001                         |
| 1     | 3        | <0.04              | 0.000                         | 0.003                         | <0.01              | 0.000                         | 0.001                         |
| 1     | 4        | <0.04              | 0.000                         | 0.003                         | <0.01              | 0.000                         | 0.001                         |
| 1     | 5        | <0.04              | 0.000                         | 0.003                         | <0.01              | 0.000                         | 0.001                         |
| 1     | 6        | <0.04              | 0.000                         | 0.003                         | <0.01              | 0.000                         | 0.001                         |
| 1     | 7        | 0.08               | 0.006                         | 0.006                         | <0.01              | 0.000                         | 0.001                         |
| 1     | 8        | <0.04              | 0.000                         | 0.003                         | <0.01              | 0.000                         | 0.001                         |
| 2     | 1        | <0.04              | 0.000                         | 0.003                         | <0.01              | 0.000                         | 0.001                         |
| 2     | 2        | <0.04              | 0.000                         | 0.003                         | <0.01              | 0.000                         | 0.001                         |
| 2     | 3        | <0.04              | 0.000                         | 0.003                         | <0.01              | 0.000                         | 0.001                         |
| 2     | 4        | <0.04              | 0.000                         | 0.003                         | <0.01              | 0.000                         | 0.001                         |
| 2     | 5        | <0.04              | 0.000                         | 0.003                         | <0.01              | 0.000                         | 0.001                         |
| 2     | 6        | <0.04              | 0.000                         | 0.003                         | <0.01              | 0.000                         | 0.001                         |
| 2     | 7        | <0.04              | 0.000                         | 0.003                         | <0.01              | 0.000                         | 0.001                         |
| 2     | 8        | <0.04              | 0.000                         | 0.003                         | <0.01              | 0.000                         | 0.001                         |
| 3     | 1        | <0.04              | 0.000                         | 0.003                         | <0.01              | 0.000                         | 0.001                         |
| 3     | 2        | <0.04              | 0.000                         | 0.003                         | <0.01              | 0.000                         | 0.001                         |
| 3     | 3        | <0.04              | 0.000                         | 0.003                         | <0.01              | 0.000                         | 0.001                         |
| 3     | 4        | <0.04              | 0.000                         | 0.003                         | <0.01              | 0.000                         | 0.001                         |
| 3     | 5        | <0.04              | 0.000                         | 0.003                         | <0.01              | 0.000                         | 0.001                         |
| 3     | 6        | <0.04              | 0.000                         | 0.003                         | <0.01              | 0.000                         | 0.001                         |
| 3     | 7        | <0.04              | 0.000                         | 0.003                         | <0.01              | 0.000                         | 0.001                         |
| 3     | 8        | <0.04              | 0.000                         | 0.003                         | <0.01              | 0.000                         | 0.001                         |
| 4     | 1        | <0.04              | 0.000                         | 0.003                         | <0.01              | 0.000                         | 0.001                         |
| 4     | 2        | <0.04              | 0.000                         | 0.003                         | <0.01              | 0.000                         | 0.001                         |
| 4     | 3        | <0.04              | 0.000                         | 0.003                         | <0.01              | 0.000                         | 0.001                         |
| 4     | 4        | <0.04              | 0.000                         | 0.003                         | <0.01              | 0.000                         | 0.001                         |
| 4     | 5        | <0.04              | 0.000                         | 0.003                         | <0.01              | 0.000                         | 0.001                         |
| 4     | 6        | <0.04              | 0.000                         | 0.003                         | <0.01              | 0.000                         | 0.001                         |
| 4     | 7        | <0.04              | 0.000                         | 0.003                         | <0.01              | 0.000                         | 0.001                         |
| 4     | 8        | <0.04              | 0.000                         | 0.003                         | <0.01              | 0.000                         | 0.001                         |
| 5     | 1        | <0.04              | 0.000                         | 0.003                         | <0.01              | 0.000                         | 0.001                         |
| 5     | 2        | <0.04              | 0.000                         | 0.003                         | <0.01              | 0.000                         | 0.001                         |
| 5     | 3        | <0.04              | 0.000                         | 0.003                         | <0.01              | 0.000                         | 0.001                         |
| 5     | 4        | <0.04              | 0.000                         | 0.003                         | <0.01              | 0.000                         | 0.001                         |
| 5     | 5        | <0.04              | 0.000                         | 0.003                         | <0.01              | 0.000                         | 0.001                         |
| 5     | 6        | <0.04              | 0.000                         | 0.003                         | <0.01              | 0.000                         | 0.001                         |
| 5     | 7        | <0.04              | 0.000                         | 0.003                         | <0.01              | 0.000                         | 0.001                         |
| 5     | 8        | <0.04              | 0.000                         | 0.003                         | <0.01              | 0.000                         | 0.001                         |
|       |          |                    | Σ min                         | Σ max                         |                    | Σ min                         | Σ max                         |
| 1     |          |                    | 0.014                         | 0.033                         |                    | 0.000                         | 0.006                         |
| 2     |          |                    | 0.000                         | 0.026                         |                    | 0.000                         | 0.006                         |
| 3     |          |                    | 0.000                         | 0.026                         |                    | 0.000                         | 0.006                         |
| 4     |          |                    | 0.000                         | 0.026                         |                    | 0.000                         | 0.006                         |
| 5     |          |                    | 0.000                         | 0.026                         |                    | 0.000                         | 0.006                         |
| Mean  |          |                    | 0.003                         | 0.027                         |                    | 0.000                         | 0.006                         |
| SD    |          |                    | 0.006                         | 0.003                         |                    | 0.000                         | 0.000                         |

**Table B.** Continued Karbon Quartzite.

| Stone | Fraction | LAB 1<br>V<br>µg/l | min<br>r<br>mg/m <sup>2</sup> | max<br>r<br>mg/m <sup>2</sup> | LAB 2<br>V<br>µg/l | min<br>r<br>mg/m <sup>2</sup> | max<br>r<br>mg/m <sup>2</sup> |
|-------|----------|--------------------|-------------------------------|-------------------------------|--------------------|-------------------------------|-------------------------------|
| 1     | 1        | 0.119              | 0.010                         | 0.010                         | <0.05              | 0.000                         | 0.004                         |
| 1     | 2        | 0.024              | 0.002                         | 0.002                         | <0.05              | 0.000                         | 0.004                         |
| 1     | 3        | 0.033              | 0.003                         | 0.003                         | <0.05              | 0.000                         | 0.004                         |
| 1     | 4        | <0.02              | 0.000                         | 0.002                         | <0.05              | 0.000                         | 0.004                         |
| 1     | 5        | <0.02              | 0.000                         | 0.002                         | <0.05              | 0.000                         | 0.004                         |
| 1     | 6        | 0.034              | 0.003                         | 0.003                         | <0.05              | 0.000                         | 0.004                         |
| 1     | 7        | 0.023              | 0.002                         | 0.002                         | <0.05              | 0.000                         | 0.004                         |
| 1     | 8        | <0.02              | 0.000                         | 0.002                         | <0.05              | 0.000                         | 0.004                         |
| 2     | 1        | 0.081              | 0.007                         | 0.007                         | <0.05              | 0.000                         | 0.004                         |
| 2     | 2        | 0.032              | 0.003                         | 0.003                         | <0.05              | 0.000                         | 0.004                         |
| 2     | 3        | 0.023              | 0.002                         | 0.002                         | <0.05              | 0.000                         | 0.004                         |
| 2     | 4        | <0.02              | 0.000                         | 0.002                         | <0.05              | 0.000                         | 0.004                         |
| 2     | 5        | <0.02              | 0.000                         | 0.002                         | <0.05              | 0.000                         | 0.004                         |
| 2     | 6        | <0.02              | 0.000                         | 0.002                         | <0.05              | 0.000                         | 0.004                         |
| 2     | 7        | <0.02              | 0.000                         | 0.002                         | <0.05              | 0.000                         | 0.004                         |
| 2     | 8        | 0.023              | 0.002                         | 0.002                         | <0.05              | 0.000                         | 0.004                         |
| 3     | 1        | 0.076              | 0.006                         | 0.006                         | <0.05              | 0.000                         | 0.004                         |
| 3     | 2        | 0.025              | 0.002                         | 0.002                         | <0.05              | 0.000                         | 0.004                         |
| 3     | 3        | <0.02              | 0.000                         | 0.002                         | <0.05              | 0.000                         | 0.004                         |
| 3     | 4        | <0.02              | 0.000                         | 0.002                         | <0.05              | 0.000                         | 0.004                         |
| 3     | 5        | 0.029              | 0.002                         | 0.002                         | <0.05              | 0.000                         | 0.004                         |
| 3     | 6        | <0.02              | 0.000                         | 0.002                         | <0.05              | 0.000                         | 0.004                         |
| 3     | 7        | <0.02              | 0.000                         | 0.002                         | <0.05              | 0.000                         | 0.004                         |
| 3     | 8        | <0.02              | 0.000                         | 0.002                         | <0.05              | 0.000                         | 0.004                         |
| 4     | 1        | 0.079              | 0.006                         | 0.006                         | <0.05              | 0.000                         | 0.004                         |
| 4     | 2        | 0.022              | 0.002                         | 0.002                         | <0.05              | 0.000                         | 0.004                         |
| 4     | 3        | <0.02              | 0.000                         | 0.002                         | <0.05              | 0.000                         | 0.004                         |
| 4     | 4        | <0.02              | 0.000                         | 0.002                         | <0.05              | 0.000                         | 0.004                         |
| 4     | 5        | <0.02              | 0.000                         | 0.002                         | <0.05              | 0.000                         | 0.004                         |
| 4     | 6        | <0.02              | 0.000                         | 0.002                         | <0.05              | 0.000                         | 0.004                         |
| 4     | 7        | <0.02              | 0.000                         | 0.002                         | <0.05              | 0.000                         | 0.004                         |
| 4     | 8        | <0.02              | 0.000                         | 0.002                         | <0.05              | 0.000                         | 0.004                         |
| 5     | 1        | 0.071              | 0.006                         | 0.006                         | <0.05              | 0.000                         | 0.004                         |
| 5     | 2        | 0.027              | 0.002                         | 0.002                         | <0.05              | 0.000                         | 0.004                         |
| 5     | 3        | <0.02              | 0.000                         | 0.002                         | <0.05              | 0.000                         | 0.004                         |
| 5     | 4        | 0.029              | 0.002                         | 0.002                         | <0.05              | 0.000                         | 0.004                         |
| 5     | 5        | 0.022              | 0.002                         | 0.002                         | <0.05              | 0.000                         | 0.004                         |
| 5     | 6        | <0.02              | 0.000                         | 0.002                         | <0.05              | 0.000                         | 0.004                         |
| 5     | 7        | <0.02              | 0.000                         | 0.002                         | <0.05              | 0.000                         | 0.004                         |
| 5     | 8        | 0.028              | 0.002                         | 0.002                         | <0.05              | 0.000                         | 0.004                         |
|       |          |                    | Σ min                         | Σ max                         |                    | Σ min                         | Σ max                         |
| 1     |          |                    | 0.019                         | 0.024                         |                    | 0.000                         | 0.032                         |
| 2     |          |                    | 0.013                         | 0.019                         |                    | 0.000                         | 0.032                         |
| 3     |          |                    | 0.010                         | 0.018                         |                    | 0.000                         | 0.032                         |
| 4     |          |                    | 0.008                         | 0.018                         |                    | 0.000                         | 0.032                         |
| 5     |          |                    | 0.014                         | 0.019                         |                    | 0.000                         | 0.032                         |
| Mean  |          |                    | 0.013                         | 0.020                         |                    | 0.000                         | 0.032                         |
| SD    |          |                    | 0.004                         | 0.002                         |                    | 0.000                         | 0.000                         |

**Table B.** Continued Karbon Quartzite.

| Stone | Fraction | LAB 1<br>Zn<br>µg/l | min<br>r<br>mg/m <sup>2</sup> | max<br>r<br>mg/m <sup>2</sup> | LAB 2<br>Zn<br>µg/l | min<br>r<br>mg/m <sup>2</sup> | max<br>r<br>mg/m <sup>2</sup> |
|-------|----------|---------------------|-------------------------------|-------------------------------|---------------------|-------------------------------|-------------------------------|
| 1     | 1        | 5                   | 0.4                           | 0.4                           | <0.47               | 0.00                          | 0.04                          |
| 1     | 2        | 432                 | 34.5                          | 34.5                          | <0.47               | 0.00                          | 0.04                          |
| 1     | 3        | 285                 | 22.8                          | 22.8                          | 1.08                | 0.09                          | 0.09                          |
| 1     | 4        | 425                 | 34.0                          | 34.0                          | <0.47               | 0.00                          | 0.04                          |
| 1     | 5        | 427                 | 34.1                          | 34.1                          | <0.47               | 0.00                          | 0.04                          |
| 1     | 6        | 414                 | 33.1                          | 33.1                          | <0.47               | 0.00                          | 0.04                          |
| 1     | 7        | 468                 | 37.4                          | 37.4                          | <0.47               | 0.00                          | 0.04                          |
| 1     | 8        | 335                 | 26.8                          | 26.8                          | <0.47               | 0.00                          | 0.04                          |
| 2     | 1        | 3                   | 0.2                           | 0.2                           | <0.47               | 0.00                          | 0.04                          |
| 2     | 2        | 438                 | 35.0                          | 35.0                          | <0.47               | 0.00                          | 0.04                          |
| 2     | 3        | 273                 | 21.9                          | 21.9                          | 0.64                | 0.05                          | 0.05                          |
| 2     | 4        | 29                  | 2.3                           | 2.3                           | <0.47               | 0.00                          | 0.04                          |
| 2     | 5        | 434                 | 34.7                          | 34.7                          | <0.47               | 0.00                          | 0.04                          |
| 2     | 6        | 224                 | 17.9                          | 17.9                          | <0.47               | 0.00                          | 0.04                          |
| 2     | 7        | 480                 | 38.4                          | 38.4                          | <0.47               | 0.00                          | 0.04                          |
| 2     | 8        | 249                 | 19.9                          | 19.9                          | <0.47               | 0.00                          | 0.04                          |
| 3     | 1        | 11                  | 0.9                           | 0.9                           | 1.01                | 0.08                          | 0.08                          |
| 3     | 2        | 441                 | 35.3                          | 35.3                          | <0.47               | 0.00                          | 0.04                          |
| 3     | 3        | 99                  | 7.9                           | 7.9                           | <0.47               | 0.00                          | 0.04                          |
| 3     | 4        | 42                  | 3.4                           | 3.4                           | <0.47               | 0.00                          | 0.04                          |
| 3     | 5        | 527                 | 42.2                          | 42.2                          | <0.47               | 0.00                          | 0.04                          |
| 3     | 6        | 309                 | 24.7                          | 24.7                          | <0.47               | 0.00                          | 0.04                          |
| 3     | 7        | 498                 | 39.9                          | 39.9                          | 1.05                | 0.08                          | 0.08                          |
| 3     | 8        | 291                 | 23.3                          | 23.3                          | 1.27                | 0.10                          | 0.10                          |
| 4     | 1        | 27                  | 2.1                           | 2.1                           | <0.47               | 0.00                          | 0.04                          |
| 4     | 2        | 310                 | 24.8                          | 24.8                          | <0.47               | 0.00                          | 0.04                          |
| 4     | 3        | 468                 | 37.4                          | 37.4                          | <0.47               | 0.00                          | 0.04                          |
| 4     | 4        | 323                 | 25.9                          | 25.9                          | <0.47               | 0.00                          | 0.04                          |
| 4     | 5        | 469                 | 37.6                          | 37.6                          | <0.47               | 0.00                          | 0.04                          |
| 4     | 6        | 466                 | 37.2                          | 37.2                          | <0.47               | 0.00                          | 0.04                          |
| 4     | 7        | 473                 | 37.8                          | 37.8                          | <0.47               | 0.00                          | 0.04                          |
| 4     | 8        | 367                 | 29.4                          | 29.4                          | <0.47               | 0.00                          | 0.04                          |
| 5     | 1        | 4                   | 0.3                           | 0.3                           | <0.47               | 0.00                          | 0.04                          |
| 5     | 2        | 267                 | 21.4                          | 21.4                          | <0.47               | 0.00                          | 0.04                          |
| 5     | 3        | 35                  | 2.8                           | 2.8                           | <0.47               | 0.00                          | 0.04                          |
| 5     | 4        | 286                 | 22.9                          | 22.9                          | <0.47               | 0.00                          | 0.04                          |
| 5     | 5        | 328                 | 26.2                          | 26.2                          | <0.47               | 0.00                          | 0.04                          |
| 5     | 6        | 287                 | 22.9                          | 22.9                          | <0.47               | 0.00                          | 0.04                          |
| 5     | 7        | 392                 | 31.4                          | 31.4                          | <0.47               | 0.00                          | 0.04                          |
| 5     | 8        | 294                 | 23.5                          | 23.5                          | <0.47               | 0.00                          | 0.04                          |
|       |          |                     | Σ min                         | Σ max                         |                     | Σ min                         | Σ max                         |
| 1     |          |                     | 223.2                         | 223.2                         |                     | 0.09                          | 0.35                          |
| 2     |          |                     | 170.3                         | 170.3                         |                     | 0.05                          | 0.31                          |
| 3     |          |                     | 177.5                         | 177.5                         |                     | 0.27                          | 0.45                          |
| 4     |          |                     | 232.1                         | 232.1                         |                     | 0.00                          | 0.30                          |
| 5     |          |                     | 151.4                         | 151.4                         |                     | 0.00                          | 0.30                          |
| Mean  |          |                     | 190.9                         | 190.9                         |                     | 0.08                          | 0.34                          |
| SD    |          |                     | 35.0                          | 35.0                          |                     | 0.11                          | 0.06                          |

**Table C.** DSLT results Basalt (LAB 1 DSLT contract laboratory, LAB 2 DSLT BfG).

| Stone | Fraction | LAB 1<br>Al<br>µg/l | min<br>r<br>mg/m <sup>2</sup> | max<br>r<br>mg/m <sup>2</sup> | LAB 2<br>Al<br>µg/l | min<br>r<br>mg/m <sup>2</sup> | max<br>r<br>mg/m <sup>2</sup> |
|-------|----------|---------------------|-------------------------------|-------------------------------|---------------------|-------------------------------|-------------------------------|
| 1     | 1        | <40.8               | 0.00                          | 3.26                          | 39.96               | 3.20                          | 3.20                          |
| 1     | 2        | <40.8               | 0.00                          | 3.26                          | 36.97               | 2.96                          | 2.96                          |
| 1     | 3        | <40.8               | 0.00                          | 3.26                          | 40.53               | 3.24                          | 3.24                          |
| 1     | 4        | <40.8               | 0.00                          | 3.26                          | 46.24               | 3.70                          | 3.70                          |
| 1     | 5        | <40.8               | 0.00                          | 3.26                          | 61.32               | 4.91                          | 4.91                          |
| 1     | 6        | <40.8               | 0.00                          | 3.26                          | 64.39               | 5.15                          | 5.15                          |
| 1     | 7        | <40.8               | 0.00                          | 3.26                          | 56.51               | 4.52                          | 4.52                          |
| 1     | 8        | <40.8               | 0.00                          | 3.26                          | 60.97               | 4.88                          | 4.88                          |
| 2     | 1        | <40.8               | 0.00                          | 3.26                          | 61.91               | 4.88                          | 4.88                          |
| 2     | 2        | <40.8               | 0.00                          | 3.26                          | 33.16               | 2.61                          | 2.61                          |
| 2     | 3        | <40.8               | 0.00                          | 3.26                          | 27.30               | 2.15                          | 2.15                          |
| 2     | 4        | <40.8               | 0.00                          | 3.26                          | 23.74               | 1.87                          | 1.87                          |
| 2     | 5        | <40.8               | 0.00                          | 3.26                          | 32.91               | 2.59                          | 2.59                          |
| 2     | 6        | <40.8               | 0.00                          | 3.26                          | 32.16               | 2.53                          | 2.53                          |
| 2     | 7        | <40.8               | 0.00                          | 3.26                          | 31.65               | 2.49                          | 2.49                          |
| 2     | 8        | 126.2               | 10.10                         | 10.10                         | 24.59               | 1.94                          | 1.94                          |
| 3     | 1        | 60.83               | 4.87                          | 4.87                          | 196.70              | 15.75                         | 15.75                         |
| 3     | 2        | <40.8               | 0.00                          | 3.26                          | 78.87               | 6.31                          | 6.31                          |
| 3     | 3        | <40.8               | 0.00                          | 3.26                          | 36.70               | 2.94                          | 2.94                          |
| 3     | 4        | <40.8               | 0.00                          | 3.26                          | 31.04               | 2.48                          | 2.48                          |
| 3     | 5        | <40.8               | 0.00                          | 3.26                          | 40.40               | 3.23                          | 3.23                          |
| 3     | 6        | <40.8               | 0.00                          | 3.26                          | 49.55               | 3.97                          | 3.97                          |
| 3     | 7        | <40.8               | 0.00                          | 3.26                          | 38.23               | 3.06                          | 3.06                          |
| 3     | 8        | <40.8               | 0.00                          | 3.26                          | 27.59               | 2.21                          | 2.21                          |
| 4     | 1        | 111.6               | 8.93                          | 8.93                          | 24.26               | 1.94                          | 1.94                          |
| 4     | 2        | <40.8               | 0.00                          | 3.26                          | 24.32               | 1.95                          | 1.95                          |
| 4     | 3        | <40.8               | 0.00                          | 3.26                          | 27.05               | 2.16                          | 2.16                          |
| 4     | 4        | <40.8               | 0.00                          | 3.26                          | 29.98               | 2.40                          | 2.40                          |
| 4     | 5        | <40.8               | 0.00                          | 3.26                          | 40.15               | 3.21                          | 3.21                          |
| 4     | 6        | <40.8               | 0.00                          | 3.26                          | 41.95               | 3.36                          | 3.36                          |
| 4     | 7        | <40.8               | 0.00                          | 3.26                          | 41.10               | 3.29                          | 3.29                          |
| 4     | 8        | <40.8               | 0.00                          | 3.26                          | 48.30               | 3.87                          | 3.87                          |
| 5     | 1        | <40.8               | 0.00                          | 3.26                          | 93.10               | 7.45                          | 7.45                          |
| 5     | 2        | <40.8               | 0.00                          | 3.26                          | 47.69               | 3.82                          | 3.82                          |
| 5     | 3        | <40.8               | 0.00                          | 3.26                          | 38.03               | 3.04                          | 3.04                          |
| 5     | 4        | <40.8               | 0.00                          | 3.26                          | 32.41               | 2.59                          | 2.59                          |
| 5     | 5        | <40.8               | 0.00                          | 3.26                          | 31.46               | 2.52                          | 2.52                          |
| 5     | 6        | <40.8               | 0.00                          | 3.26                          | 36.97               | 2.96                          | 2.96                          |
| 5     | 7        | <40.8               | 0.00                          | 3.26                          | 31.18               | 2.50                          | 2.50                          |
| 5     | 8        | 172.5               | 13.80                         | 13.80                         | 24.23               | 1.94                          | 1.94                          |
|       |          |                     | Σ min                         | Σ max                         |                     | Σ min                         | Σ max                         |
| 1     |          |                     | 0.00                          | 26.11                         |                     | 32.55                         | 32.55                         |
| 2     |          |                     | 10.10                         | 32.95                         |                     | 21.08                         | 21.08                         |
| 3     |          |                     | 4.87                          | 27.71                         |                     | 39.95                         | 39.95                         |
| 4     |          |                     | 8.93                          | 31.77                         |                     | 22.18                         | 22.18                         |
| 5     |          |                     | 13.80                         | 36.64                         |                     | 26.82                         | 26.82                         |
| Mean  |          |                     | 7.54                          | 31.04                         |                     | 28.51                         | 28.51                         |
| SD    |          |                     | 5.28                          | 4.21                          |                     | 7.83                          | 7.83                          |

**Table C.** Continued Basalt.

| Stone | Fraction | LAB 1<br>As<br>µg/l | min<br>r<br>mg/m <sup>2</sup> | max<br>r<br>mg/m <sup>2</sup> | LAB 2<br>As<br>µg/l | min<br>r<br>mg/m <sup>2</sup> | max<br>r<br>mg/m <sup>2</sup> |
|-------|----------|---------------------|-------------------------------|-------------------------------|---------------------|-------------------------------|-------------------------------|
| 1     | 1        | 0.05                | 0.004                         | 0.004                         | <0.04               | 0.000                         | 0.003                         |
| 1     | 2        | 0.06                | 0.005                         | 0.005                         | <0.04               | 0.000                         | 0.003                         |
| 1     | 3        | 0.04                | 0.003                         | 0.003                         | <0.04               | 0.000                         | 0.003                         |
| 1     | 4        | 0.04                | 0.003                         | 0.003                         | <0.04               | 0.000                         | 0.003                         |
| 1     | 5        | 0.05                | 0.004                         | 0.004                         | <0.04               | 0.000                         | 0.003                         |
| 1     | 6        | 0.06                | 0.005                         | 0.005                         | <0.04               | 0.000                         | 0.003                         |
| 1     | 7        | 0.06                | 0.004                         | 0.004                         | <0.04               | 0.000                         | 0.003                         |
| 1     | 8        | 0.07                | 0.006                         | 0.006                         | <0.04               | 0.000                         | 0.003                         |
| 2     | 1        | 0.06                | 0.005                         | 0.005                         | <0.04               | 0.000                         | 0.003                         |
| 2     | 2        | 0.04                | 0.003                         | 0.003                         | <0.04               | 0.000                         | 0.003                         |
| 2     | 3        | <0.03               | 0.000                         | 0.002                         | <0.04               | 0.000                         | 0.003                         |
| 2     | 4        | 0.04                | 0.003                         | 0.003                         | <0.04               | 0.000                         | 0.003                         |
| 2     | 5        | 0.06                | 0.005                         | 0.005                         | <0.04               | 0.000                         | 0.003                         |
| 2     | 6        | 0.08                | 0.006                         | 0.006                         | <0.04               | 0.000                         | 0.003                         |
| 2     | 7        | 0.08                | 0.007                         | 0.007                         | <0.04               | 0.000                         | 0.003                         |
| 2     | 8        | 0.13                | 0.010                         | 0.010                         | <0.04               | 0.000                         | 0.003                         |
| 3     | 1        | 0.07                | 0.006                         | 0.006                         | <0.04               | 0.000                         | 0.003                         |
| 3     | 2        | 0.05                | 0.004                         | 0.004                         | <0.04               | 0.000                         | 0.003                         |
| 3     | 3        | 0.04                | 0.003                         | 0.003                         | <0.04               | 0.000                         | 0.003                         |
| 3     | 4        | 0.05                | 0.004                         | 0.004                         | <0.04               | 0.000                         | 0.003                         |
| 3     | 5        | 0.06                | 0.005                         | 0.005                         | <0.04               | 0.000                         | 0.003                         |
| 3     | 6        | 0.07                | 0.005                         | 0.005                         | <0.04               | 0.000                         | 0.003                         |
| 3     | 7        | 0.07                | 0.005                         | 0.005                         | <0.04               | 0.000                         | 0.003                         |
| 3     | 8        | 0.11                | 0.008                         | 0.008                         | <0.04               | 0.000                         | 0.003                         |
| 4     | 1        | 0.09                | 0.007                         | 0.007                         | <0.04               | 0.000                         | 0.003                         |
| 4     | 2        | 0.05                | 0.004                         | 0.004                         | <0.04               | 0.000                         | 0.003                         |
| 4     | 3        | 0.03                | 0.003                         | 0.003                         | <0.04               | 0.000                         | 0.003                         |
| 4     | 4        | 0.03                | 0.003                         | 0.003                         | <0.04               | 0.000                         | 0.003                         |
| 4     | 5        | 0.04                | 0.003                         | 0.003                         | <0.04               | 0.000                         | 0.003                         |
| 4     | 6        | 0.05                | 0.004                         | 0.004                         | <0.04               | 0.000                         | 0.003                         |
| 4     | 7        | 0.05                | 0.004                         | 0.004                         | <0.04               | 0.000                         | 0.003                         |
| 4     | 8        | 0.06                | 0.005                         | 0.005                         | <0.04               | 0.000                         | 0.003                         |
| 5     | 1        | 0.06                | 0.005                         | 0.005                         | <0.04               | 0.000                         | 0.003                         |
| 5     | 2        | 0.06                | 0.005                         | 0.005                         | <0.04               | 0.000                         | 0.003                         |
| 5     | 3        | <0.03               | 0.000                         | 0.002                         | <0.04               | 0.000                         | 0.003                         |
| 5     | 4        | 0.05                | 0.004                         | 0.004                         | <0.04               | 0.000                         | 0.003                         |
| 5     | 5        | 0.06                | 0.005                         | 0.005                         | <0.04               | 0.000                         | 0.003                         |
| 5     | 6        | 0.07                | 0.006                         | 0.006                         | <0.04               | 0.000                         | 0.003                         |
| 5     | 7        | 0.07                | 0.005                         | 0.005                         | <0.04               | 0.000                         | 0.003                         |
| 5     | 8        | 0.12                | 0.010                         | 0.010                         | <0.04               | 0.000                         | 0.003                         |
|       |          |                     | Σ min                         | Σ max                         |                     | Σ min                         | Σ max                         |
| 1     |          |                     | 0.034                         | 0.034                         |                     | 0.000                         | 0.026                         |
| 2     |          |                     | 0.040                         | 0.042                         |                     | 0.000                         | 0.025                         |
| 3     |          |                     | 0.040                         | 0.040                         |                     | 0.000                         | 0.026                         |
| 4     |          |                     | 0.032                         | 0.032                         |                     | 0.000                         | 0.026                         |
| 5     |          |                     | 0.039                         | 0.041                         |                     | 0.000                         | 0.026                         |
| Mean  |          |                     | 0.037                         | 0.038                         |                     | 0.000                         | 0.026                         |
| SD    |          |                     | 0.004                         | 0.004                         |                     | 0.000                         | 0.000                         |

**Table C.** Continued Basalt.

| Stone | Fraction | LAB 1<br>Ba<br>µg/l | min<br>r<br>mg/m <sup>2</sup> | max<br>r<br>mg/m <sup>2</sup> | LAB 2<br>Ba<br>µg/l | min<br>r<br>mg/m <sup>2</sup> | max<br>r<br>mg/m <sup>2</sup> |
|-------|----------|---------------------|-------------------------------|-------------------------------|---------------------|-------------------------------|-------------------------------|
| 1     | 1        | 0.7                 | 0.1                           | 0.1                           | 0.56                | 0.05                          | 0.05                          |
| 1     | 2        | 400.1               | 32.0                          | 32.0                          | 0.58                | 0.05                          | 0.05                          |
| 1     | 3        | 369.2               | 29.5                          | 29.5                          | 0.52                | 0.04                          | 0.04                          |
| 1     | 4        | 437.5               | 35.0                          | 35.0                          | 0.45                | 0.04                          | 0.04                          |
| 1     | 5        | 451.5               | 36.1                          | 36.1                          | <0.31               | 0.00                          | 0.02                          |
| 1     | 6        | 463.6               | 37.1                          | 37.1                          | <0.31               | 0.00                          | 0.02                          |
| 1     | 7        | 477.4               | 38.2                          | 38.2                          | <0.31               | 0.00                          | 0.02                          |
| 1     | 8        | 363.8               | 29.1                          | 29.1                          | <0.31               | 0.00                          | 0.02                          |
| 2     | 1        | 0.6                 | 0.1                           | 0.1                           | <0.31               | 0.00                          | 0.02                          |
| 2     | 2        | 460.4               | 36.8                          | 36.8                          | <0.31               | 0.00                          | 0.02                          |
| 2     | 3        | 46.4                | 3.7                           | 3.7                           | <0.31               | 0.00                          | 0.02                          |
| 2     | 4        | 475.2               | 38.0                          | 38.0                          | <0.31               | 0.00                          | 0.02                          |
| 2     | 5        | 513.7               | 41.1                          | 41.1                          | <0.31               | 0.00                          | 0.02                          |
| 2     | 6        | 492.8               | 39.4                          | 39.4                          | <0.31               | 0.00                          | 0.02                          |
| 2     | 7        | 412.7               | 33.0                          | 33.0                          | <0.31               | 0.00                          | 0.02                          |
| 2     | 8        | 386.6               | 30.9                          | 30.9                          | <0.31               | 0.00                          | 0.02                          |
| 3     | 1        | 0.7                 | 0.1                           | 0.1                           | <0.31               | 0.00                          | 0.02                          |
| 3     | 2        | 412.9               | 33.0                          | 33.0                          | <0.31               | 0.00                          | 0.02                          |
| 3     | 3        | 393.4               | 31.5                          | 31.5                          | <0.31               | 0.00                          | 0.02                          |
| 3     | 4        | 443.6               | 35.5                          | 35.5                          | <0.31               | 0.00                          | 0.02                          |
| 3     | 5        | 437.8               | 35.0                          | 35.0                          | <0.31               | 0.00                          | 0.02                          |
| 3     | 6        | 438.8               | 35.1                          | 35.1                          | <0.31               | 0.00                          | 0.02                          |
| 3     | 7        | 141.7               | 11.3                          | 11.3                          | <0.31               | 0.00                          | 0.02                          |
| 3     | 8        | 437.1               | 35.0                          | 35.0                          | <0.31               | 0.00                          | 0.02                          |
| 4     | 1        | 0.9                 | 0.1                           | 0.1                           | <0.31               | 0.00                          | 0.02                          |
| 4     | 2        | 392.9               | 31.4                          | 31.4                          | <0.31               | 0.00                          | 0.02                          |
| 4     | 3        | 392.4               | 31.4                          | 31.4                          | <0.31               | 0.00                          | 0.02                          |
| 4     | 4        | 385.1               | 30.8                          | 30.8                          | <0.31               | 0.00                          | 0.02                          |
| 4     | 5        | 464.8               | 37.2                          | 37.2                          | <0.31               | 0.00                          | 0.02                          |
| 4     | 6        | 404.1               | 32.3                          | 32.3                          | <0.31               | 0.00                          | 0.02                          |
| 4     | 7        | 478.3               | 38.3                          | 38.3                          | <0.31               | 0.00                          | 0.02                          |
| 4     | 8        | 359.7               | 28.8                          | 28.8                          | <0.31               | 0.00                          | 0.02                          |
| 5     | 1        | 0.7                 | 0.1                           | 0.1                           | <0.31               | 0.00                          | 0.02                          |
| 5     | 2        | 371.4               | 29.7                          | 29.7                          | <0.31               | 0.00                          | 0.02                          |
| 5     | 3        | 30.3                | 2.4                           | 2.4                           | <0.31               | 0.00                          | 0.02                          |
| 5     | 4        | 446.1               | 35.7                          | 35.7                          | <0.31               | 0.00                          | 0.02                          |
| 5     | 5        | 499.8               | 40.0                          | 40.0                          | <0.31               | 0.00                          | 0.02                          |
| 5     | 6        | 493.5               | 39.5                          | 39.5                          | <0.31               | 0.00                          | 0.02                          |
| 5     | 7        | 162.3               | 13.0                          | 13.0                          | <0.31               | 0.00                          | 0.02                          |
| 5     | 8        | 575.8               | 46.1                          | 46.1                          | <0.31               | 0.00                          | 0.02                          |
|       |          |                     | Σ min                         | Σ max                         |                     | Σ min                         | Σ max                         |
| 1     |          |                     | 237.1                         | 237.1                         |                     | 0.17                          | 0.27                          |
| 2     |          |                     | 223.1                         | 223.1                         |                     | 0.00                          | 0.20                          |
| 3     |          |                     | 216.5                         | 216.5                         |                     | 0.00                          | 0.20                          |
| 4     |          |                     | 230.2                         | 230.2                         |                     | 0.00                          | 0.20                          |
| 5     |          |                     | 206.4                         | 206.4                         |                     | 0.00                          | 0.20                          |
| Mean  |          |                     | 222.7                         | 222.7                         |                     | 0.03                          | 0.21                          |
| SD    |          |                     | 11.9                          | 11.9                          |                     | 0.08                          | 0.03                          |

**Table C.** Continued Basalt.

| Stone | Fraction | LAB 1<br>Cd<br>µg/l | min<br>r<br>mg/m <sup>2</sup> | max<br>r<br>mg/m <sup>2</sup> | LAB 2<br>Cd<br>µg/l | min<br>r<br>mg/m <sup>2</sup> | max<br>r<br>mg/m <sup>2</sup> |
|-------|----------|---------------------|-------------------------------|-------------------------------|---------------------|-------------------------------|-------------------------------|
| 1     | 1        | <0.01               | 0.000                         | 0.001                         | <0.03               | 0.000                         | 0.002                         |
| 1     | 2        | 0.023               | 0.002                         | 0.002                         | <0.03               | 0.000                         | 0.002                         |
| 1     | 3        | 0.024               | 0.002                         | 0.002                         | <0.03               | 0.000                         | 0.002                         |
| 1     | 4        | 0.023               | 0.002                         | 0.002                         | <0.03               | 0.000                         | 0.002                         |
| 1     | 5        | 0.023               | 0.002                         | 0.002                         | <0.03               | 0.000                         | 0.002                         |
| 1     | 6        | 0.026               | 0.002                         | 0.002                         | <0.03               | 0.000                         | 0.002                         |
| 1     | 7        | 0.029               | 0.002                         | 0.002                         | <0.03               | 0.000                         | 0.002                         |
| 1     | 8        | 0.025               | 0.002                         | 0.002                         | <0.03               | 0.000                         | 0.002                         |
| 2     | 1        | 0.008               | 0.001                         | 0.001                         | <0.03               | 0.000                         | 0.002                         |
| 2     | 2        | 0.029               | 0.002                         | 0.002                         | <0.03               | 0.000                         | 0.002                         |
| 2     | 3        | <0.01               | 0.000                         | 0.001                         | <0.03               | 0.000                         | 0.002                         |
| 2     | 4        | 0.029               | 0.002                         | 0.002                         | <0.03               | 0.000                         | 0.002                         |
| 2     | 5        | 0.030               | 0.002                         | 0.002                         | <0.03               | 0.000                         | 0.002                         |
| 2     | 6        | 0.036               | 0.003                         | 0.003                         | <0.03               | 0.000                         | 0.002                         |
| 2     | 7        | 0.033               | 0.003                         | 0.003                         | <0.03               | 0.000                         | 0.002                         |
| 2     | 8        | 0.031               | 0.002                         | 0.002                         | <0.03               | 0.000                         | 0.002                         |
| 3     | 1        | 0.014               | 0.001                         | 0.001                         | <0.03               | 0.000                         | 0.002                         |
| 3     | 2        | 0.019               | 0.002                         | 0.002                         | <0.03               | 0.000                         | 0.002                         |
| 3     | 3        | 0.021               | 0.002                         | 0.002                         | <0.03               | 0.000                         | 0.002                         |
| 3     | 4        | 0.025               | 0.002                         | 0.002                         | <0.03               | 0.000                         | 0.002                         |
| 3     | 5        | 0.024               | 0.002                         | 0.002                         | <0.03               | 0.000                         | 0.002                         |
| 3     | 6        | 0.027               | 0.002                         | 0.002                         | <0.03               | 0.000                         | 0.002                         |
| 3     | 7        | 0.015               | 0.001                         | 0.001                         | <0.03               | 0.000                         | 0.002                         |
| 3     | 8        | 0.025               | 0.002                         | 0.002                         | <0.03               | 0.000                         | 0.002                         |
| 4     | 1        | 0.012               | 0.001                         | 0.001                         | <0.03               | 0.000                         | 0.002                         |
| 4     | 2        | 0.028               | 0.002                         | 0.002                         | <0.03               | 0.000                         | 0.002                         |
| 4     | 3        | 0.026               | 0.002                         | 0.002                         | <0.03               | 0.000                         | 0.002                         |
| 4     | 4        | 0.026               | 0.002                         | 0.002                         | <0.03               | 0.000                         | 0.002                         |
| 4     | 5        | 0.028               | 0.002                         | 0.002                         | <0.03               | 0.000                         | 0.002                         |
| 4     | 6        | 0.024               | 0.002                         | 0.002                         | <0.03               | 0.000                         | 0.002                         |
| 4     | 7        | 0.031               | 0.002                         | 0.002                         | <0.03               | 0.000                         | 0.002                         |
| 4     | 8        | 0.026               | 0.002                         | 0.002                         | <0.03               | 0.000                         | 0.002                         |
| 5     | 1        | <0.01               | 0.000                         | 0.001                         | <0.03               | 0.000                         | 0.002                         |
| 5     | 2        | 0.028               | 0.002                         | 0.002                         | <0.03               | 0.000                         | 0.002                         |
| 5     | 3        | <0.01               | 0.000                         | 0.001                         | <0.03               | 0.000                         | 0.002                         |
| 5     | 4        | 0.022               | 0.002                         | 0.002                         | <0.03               | 0.000                         | 0.002                         |
| 5     | 5        | 0.028               | 0.002                         | 0.002                         | <0.03               | 0.000                         | 0.002                         |
| 5     | 6        | 0.027               | 0.002                         | 0.002                         | <0.03               | 0.000                         | 0.002                         |
| 5     | 7        | 0.011               | 0.001                         | 0.001                         | <0.03               | 0.000                         | 0.002                         |
| 5     | 8        | 0.030               | 0.002                         | 0.002                         | <0.03               | 0.000                         | 0.002                         |
|       |          |                     | Σ min                         | Σ max                         |                     | Σ min                         | Σ max                         |
| 1     |          |                     | 0.014                         | 0.015                         |                     | 0.000                         | 0.019                         |
| 2     |          |                     | 0.016                         | 0.017                         |                     | 0.000                         | 0.019                         |
| 3     |          |                     | 0.013                         | 0.013                         |                     | 0.000                         | 0.019                         |
| 4     |          |                     | 0.016                         | 0.016                         |                     | 0.000                         | 0.019                         |
| 5     |          |                     | 0.012                         | 0.013                         |                     | 0.000                         | 0.019                         |
| Mean  |          |                     | 0.014                         | 0.015                         |                     | 0.000                         | 0.019                         |
| SD    |          |                     | 0.002                         | 0.001                         |                     | 0.000                         | 0.000                         |

**Table C.** Continued Basalt.

| Stone | Fraction | LAB 1<br>Co<br>µg/l | min<br>r<br>mg/m <sup>2</sup> | max<br>r<br>mg/m <sup>2</sup> | LAB 2<br>Co<br>µg/l | min<br>r<br>mg/m <sup>2</sup> | max<br>r<br>mg/m <sup>2</sup> |
|-------|----------|---------------------|-------------------------------|-------------------------------|---------------------|-------------------------------|-------------------------------|
| 1     | 1        | 0.017               | 0.001                         | 0.001                         | <0.03               | 0.000                         | 0.002                         |
| 1     | 2        | 0.074               | 0.006                         | 0.006                         | <0.03               | 0.000                         | 0.002                         |
| 1     | 3        | 0.064               | 0.005                         | 0.005                         | <0.03               | 0.000                         | 0.002                         |
| 1     | 4        | 0.065               | 0.005                         | 0.005                         | <0.03               | 0.000                         | 0.002                         |
| 1     | 5        | 0.072               | 0.006                         | 0.006                         | <0.03               | 0.000                         | 0.002                         |
| 1     | 6        | 0.076               | 0.006                         | 0.006                         | <0.03               | 0.000                         | 0.002                         |
| 1     | 7        | 0.072               | 0.006                         | 0.006                         | <0.03               | 0.000                         | 0.002                         |
| 1     | 8        | 0.115               | 0.009                         | 0.009                         | <0.03               | 0.000                         | 0.002                         |
| 2     | 1        | 0.018               | 0.001                         | 0.001                         | <0.03               | 0.000                         | 0.002                         |
| 2     | 2        | 0.082               | 0.007                         | 0.007                         | <0.03               | 0.000                         | 0.002                         |
| 2     | 3        | 0.020               | 0.000                         | 0.002                         | <0.03               | 0.000                         | 0.002                         |
| 2     | 4        | 0.077               | 0.006                         | 0.006                         | <0.03               | 0.000                         | 0.002                         |
| 2     | 5        | 0.081               | 0.006                         | 0.006                         | <0.03               | 0.000                         | 0.002                         |
| 2     | 6        | 0.080               | 0.006                         | 0.006                         | <0.03               | 0.000                         | 0.002                         |
| 2     | 7        | 0.068               | 0.005                         | 0.005                         | <0.03               | 0.000                         | 0.002                         |
| 2     | 8        | 0.122               | 0.010                         | 0.010                         | <0.03               | 0.000                         | 0.002                         |
| 3     | 1        | 0.039               | 0.003                         | 0.003                         | <0.03               | 0.000                         | 0.002                         |
| 3     | 2        | 0.075               | 0.006                         | 0.006                         | <0.03               | 0.000                         | 0.002                         |
| 3     | 3        | 0.065               | 0.005                         | 0.005                         | <0.03               | 0.000                         | 0.002                         |
| 3     | 4        | 0.073               | 0.006                         | 0.006                         | <0.03               | 0.000                         | 0.002                         |
| 3     | 5        | 0.070               | 0.006                         | 0.006                         | <0.03               | 0.000                         | 0.002                         |
| 3     | 6        | 0.075               | 0.006                         | 0.006                         | <0.03               | 0.000                         | 0.002                         |
| 3     | 7        | 0.048               | 0.004                         | 0.004                         | <0.03               | 0.000                         | 0.002                         |
| 3     | 8        | 0.122               | 0.010                         | 0.010                         | <0.03               | 0.000                         | 0.002                         |
| 4     | 1        | 0.041               | 0.003                         | 0.003                         | <0.03               | 0.000                         | 0.002                         |
| 4     | 2        | 0.073               | 0.006                         | 0.006                         | <0.03               | 0.000                         | 0.002                         |
| 4     | 3        | 0.065               | 0.005                         | 0.005                         | <0.03               | 0.000                         | 0.002                         |
| 4     | 4        | 0.070               | 0.006                         | 0.006                         | <0.03               | 0.000                         | 0.002                         |
| 4     | 5        | 0.071               | 0.006                         | 0.006                         | <0.03               | 0.000                         | 0.002                         |
| 4     | 6        | 0.078               | 0.006                         | 0.006                         | <0.03               | 0.000                         | 0.002                         |
| 4     | 7        | 0.078               | 0.006                         | 0.006                         | <0.03               | 0.000                         | 0.002                         |
| 4     | 8        | 0.113               | 0.009                         | 0.009                         | <0.03               | 0.000                         | 0.002                         |
| 5     | 1        | 0.020               | 0.000                         | 0.002                         | <0.03               | 0.000                         | 0.002                         |
| 5     | 2        | 0.089               | 0.007                         | 0.007                         | <0.03               | 0.000                         | 0.002                         |
| 5     | 3        | 0.020               | 0.000                         | 0.002                         | <0.03               | 0.000                         | 0.002                         |
| 5     | 4        | 0.071               | 0.006                         | 0.006                         | <0.03               | 0.000                         | 0.002                         |
| 5     | 5        | 0.074               | 0.006                         | 0.006                         | <0.03               | 0.000                         | 0.002                         |
| 5     | 6        | 0.072               | 0.006                         | 0.006                         | <0.03               | 0.000                         | 0.002                         |
| 5     | 7        | 0.029               | 0.002                         | 0.002                         | <0.03               | 0.000                         | 0.002                         |
| 5     | 8        | 0.115               | 0.009                         | 0.009                         | <0.03               | 0.000                         | 0.002                         |
|       |          |                     | Σ min                         | Σ max                         |                     | Σ min                         | Σ max                         |
| 1     |          |                     | 0.044                         | 0.044                         |                     | 0.000                         | 0.019                         |
| 2     |          |                     | 0.042                         | 0.044                         |                     | 0.000                         | 0.019                         |
| 3     |          |                     | 0.045                         | 0.045                         |                     | 0.000                         | 0.019                         |
| 4     |          |                     | 0.047                         | 0.047                         |                     | 0.000                         | 0.019                         |
| 5     |          |                     | 0.036                         | 0.039                         |                     | 0.000                         | 0.019                         |
| Mean  |          |                     | 0.043                         | 0.044                         |                     | 0.000                         | 0.019                         |
| SD    |          |                     | 0.004                         | 0.003                         |                     | 0.000                         | 0.000                         |

**Table C.** Continued Basalt.

| Stone | Fraction | LAB 1<br>Cr<br>µg/l | min<br>r<br>mg/m <sup>2</sup> | max<br>r<br>mg/m <sup>2</sup> | LAB 2<br>Cr<br>µg/l | min<br>r<br>mg/m <sup>2</sup> | max<br>r<br>mg/m <sup>2</sup> |
|-------|----------|---------------------|-------------------------------|-------------------------------|---------------------|-------------------------------|-------------------------------|
| 1     | 1        | 0.079               | 0.006                         | 0.006                         | <0.11               | 0.000                         | 0.009                         |
| 1     | 2        | 0.063               | 0.005                         | 0.005                         | <0.11               | 0.000                         | 0.009                         |
| 1     | 3        | 0.063               | 0.005                         | 0.005                         | <0.11               | 0.000                         | 0.009                         |
| 1     | 4        | 0.068               | 0.005                         | 0.005                         | <0.11               | 0.000                         | 0.009                         |
| 1     | 5        | 0.078               | 0.006                         | 0.006                         | <0.11               | 0.000                         | 0.009                         |
| 1     | 6        | 0.139               | 0.011                         | 0.011                         | <0.11               | 0.000                         | 0.009                         |
| 1     | 7        | <0.06               | 0.000                         | 0.005                         | <0.11               | 0.000                         | 0.009                         |
| 1     | 8        | <0.06               | 0.000                         | 0.005                         | <0.11               | 0.000                         | 0.009                         |
| 2     | 1        | 0.092               | 0.007                         | 0.007                         | <0.11               | 0.000                         | 0.009                         |
| 2     | 2        | 0.077               | 0.006                         | 0.006                         | <0.11               | 0.000                         | 0.009                         |
| 2     | 3        | <0.06               | 0.000                         | 0.005                         | <0.11               | 0.000                         | 0.009                         |
| 2     | 4        | 0.100               | 0.008                         | 0.008                         | <0.11               | 0.000                         | 0.009                         |
| 2     | 5        | <0.06               | 0.000                         | 0.005                         | <0.11               | 0.000                         | 0.009                         |
| 2     | 6        | 0.082               | 0.007                         | 0.007                         | <0.11               | 0.000                         | 0.009                         |
| 2     | 7        | <0.06               | 0.000                         | 0.005                         | <0.11               | 0.000                         | 0.009                         |
| 2     | 8        | 0.114               | 0.009                         | 0.009                         | <0.11               | 0.000                         | 0.009                         |
| 3     | 1        | 0.106               | 0.009                         | 0.009                         | <0.11               | 0.000                         | 0.009                         |
| 3     | 2        | <0.06               | 0.000                         | 0.005                         | <0.11               | 0.000                         | 0.009                         |
| 3     | 3        | 0.064               | 0.005                         | 0.005                         | <0.11               | 0.000                         | 0.009                         |
| 3     | 4        | 0.071               | 0.006                         | 0.006                         | <0.11               | 0.000                         | 0.009                         |
| 3     | 5        | 0.091               | 0.007                         | 0.007                         | <0.11               | 0.000                         | 0.009                         |
| 3     | 6        | 0.084               | 0.007                         | 0.007                         | <0.11               | 0.000                         | 0.009                         |
| 3     | 7        | <0.06               | 0.000                         | 0.005                         | <0.11               | 0.000                         | 0.009                         |
| 3     | 8        | <0.06               | 0.000                         | 0.005                         | <0.11               | 0.000                         | 0.009                         |
| 4     | 1        | 0.119               | 0.009                         | 0.009                         | <0.11               | 0.000                         | 0.009                         |
| 4     | 2        | 0.071               | 0.006                         | 0.006                         | <0.11               | 0.000                         | 0.009                         |
| 4     | 3        | 0.067               | 0.005                         | 0.005                         | <0.11               | 0.000                         | 0.009                         |
| 4     | 4        | 0.059               | 0.005                         | 0.005                         | <0.11               | 0.000                         | 0.009                         |
| 4     | 5        | 0.059               | 0.005                         | 0.005                         | <0.11               | 0.000                         | 0.009                         |
| 4     | 6        | 0.083               | 0.007                         | 0.007                         | <0.11               | 0.000                         | 0.009                         |
| 4     | 7        | 0.065               | 0.005                         | 0.005                         | <0.11               | 0.000                         | 0.009                         |
| 4     | 8        | <0.06               | 0.000                         | 0.005                         | <0.11               | 0.000                         | 0.009                         |
| 5     | 1        | 0.090               | 0.007                         | 0.007                         | <0.11               | 0.000                         | 0.009                         |
| 5     | 2        | 0.070               | 0.006                         | 0.006                         | <0.11               | 0.000                         | 0.009                         |
| 5     | 3        | <0.06               | 0.000                         | 0.005                         | <0.11               | 0.000                         | 0.009                         |
| 5     | 4        | 0.063               | 0.005                         | 0.005                         | <0.11               | 0.000                         | 0.009                         |
| 5     | 5        | 0.079               | 0.006                         | 0.006                         | <0.11               | 0.000                         | 0.009                         |
| 5     | 6        | <0.06               | 0.000                         | 0.005                         | <0.11               | 0.000                         | 0.009                         |
| 5     | 7        | <0.06               | 0.000                         | 0.005                         | <0.11               | 0.000                         | 0.009                         |
| 5     | 8        | 0.181               | 0.015                         | 0.015                         | <0.11               | 0.000                         | 0.009                         |
|       |          |                     | Σ min                         | Σ max                         |                     | Σ min                         | Σ max                         |
| 1     |          |                     | 0.039                         | 0.049                         |                     | 0.000                         | 0.070                         |
| 2     |          |                     | 0.037                         | 0.052                         |                     | 0.000                         | 0.070                         |
| 3     |          |                     | 0.033                         | 0.048                         |                     | 0.000                         | 0.070                         |
| 4     |          |                     | 0.042                         | 0.047                         |                     | 0.000                         | 0.070                         |
| 5     |          |                     | 0.039                         | 0.053                         |                     | 0.000                         | 0.070                         |
| Mean  |          |                     | 0.038                         | 0.050                         |                     | 0.000                         | 0.070                         |
| SD    |          |                     | 0.003                         | 0.003                         |                     | 0.000                         | 0.000                         |

**Table C.** Continued Basalt.

| Stone | Fraction | LAB 1<br>Cu<br>µg/l | min<br>r<br>mg/m <sup>2</sup> | max<br>r<br>mg/m <sup>2</sup> | LAB 2<br>Cu<br>µg/l | min<br>r<br>mg/m <sup>2</sup> | max<br>r<br>mg/m <sup>2</sup> |
|-------|----------|---------------------|-------------------------------|-------------------------------|---------------------|-------------------------------|-------------------------------|
| 1     | 1        | 0.99                | 0.08                          | 0.08                          | 0.99                | 0.08                          | 0.08                          |
| 1     | 2        | 2.09                | 0.17                          | 0.17                          | 1.04                | 0.08                          | 0.08                          |
| 1     | 3        | 2.31                | 0.18                          | 0.18                          | 0.23                | 0.02                          | 0.02                          |
| 1     | 4        | 1.67                | 0.13                          | 0.13                          | <0.10               | 0.00                          | 0.01                          |
| 1     | 5        | 1.89                | 0.15                          | 0.15                          | <0.10               | 0.00                          | 0.01                          |
| 1     | 6        | 2.05                | 0.16                          | 0.16                          | 0.14                | 0.01                          | 0.01                          |
| 1     | 7        | 1.98                | 0.16                          | 0.16                          | <0.10               | 0.00                          | 0.01                          |
| 1     | 8        | 1.79                | 0.14                          | 0.14                          | <0.10               | 0.00                          | 0.01                          |
| 2     | 1        | 1.97                | 0.16                          | 0.16                          | 0.51                | 0.04                          | 0.04                          |
| 2     | 2        | 3.79                | 0.30                          | 0.30                          | 0.20                | 0.02                          | 0.02                          |
| 2     | 3        | 1.66                | 0.13                          | 0.13                          | 0.29                | 0.02                          | 0.02                          |
| 2     | 4        | 3.00                | 0.24                          | 0.24                          | <0.10               | 0.00                          | 0.01                          |
| 2     | 5        | 2.49                | 0.20                          | 0.20                          | <0.10               | 0.00                          | 0.01                          |
| 2     | 6        | 2.45                | 0.20                          | 0.20                          | <0.10               | 0.00                          | 0.01                          |
| 2     | 7        | 1.67                | 0.13                          | 0.13                          | <0.10               | 0.00                          | 0.01                          |
| 2     | 8        | 1.41                | 0.11                          | 0.11                          | <0.10               | 0.00                          | 0.01                          |
| 3     | 1        | 3.60                | 0.29                          | 0.29                          | 1.17                | 0.09                          | 0.09                          |
| 3     | 2        | 2.46                | 0.20                          | 0.20                          | 7.71                | 0.62                          | 0.62                          |
| 3     | 3        | 2.61                | 0.21                          | 0.21                          | 1.15                | 0.09                          | 0.09                          |
| 3     | 4        | 1.91                | 0.15                          | 0.15                          | <0.10               | 0.00                          | 0.01                          |
| 3     | 5        | 2.31                | 0.19                          | 0.19                          | <0.10               | 0.00                          | 0.01                          |
| 3     | 6        | 2.36                | 0.19                          | 0.19                          | <0.10               | 0.00                          | 0.01                          |
| 3     | 7        | 1.82                | 0.15                          | 0.15                          | <0.10               | 0.00                          | 0.01                          |
| 3     | 8        | 2.21                | 0.18                          | 0.18                          | <0.10               | 0.00                          | 0.01                          |
| 4     | 1        | 0.59                | 0.05                          | 0.05                          | 0.78                | 0.06                          | 0.06                          |
| 4     | 2        | 2.79                | 0.22                          | 0.22                          | 0.39                | 0.03                          | 0.03                          |
| 4     | 3        | 2.65                | 0.21                          | 0.21                          | 0.34                | 0.03                          | 0.03                          |
| 4     | 4        | 1.72                | 0.14                          | 0.14                          | <0.10               | 0.00                          | 0.01                          |
| 4     | 5        | 1.97                | 0.16                          | 0.16                          | <0.10               | 0.00                          | 0.01                          |
| 4     | 6        | 2.20                | 0.18                          | 0.18                          | <0.10               | 0.00                          | 0.01                          |
| 4     | 7        | 2.20                | 0.18                          | 0.18                          | <0.10               | 0.00                          | 0.01                          |
| 4     | 8        | 1.20                | 0.10                          | 0.10                          | <0.10               | 0.00                          | 0.01                          |
| 5     | 1        | 0.98                | 0.08                          | 0.08                          | 0.52                | 0.04                          | 0.04                          |
| 5     | 2        | 3.91                | 0.31                          | 0.31                          | <0.10               | 0.00                          | 0.01                          |
| 5     | 3        | 0.71                | 0.06                          | 0.06                          | 4.28                | 0.34                          | 0.34                          |
| 5     | 4        | 2.39                | 0.19                          | 0.19                          | <0.10               | 0.00                          | 0.01                          |
| 5     | 5        | 2.04                | 0.16                          | 0.16                          | <0.10               | 0.00                          | 0.01                          |
| 5     | 6        | 1.48                | 0.12                          | 0.12                          | <0.10               | 0.00                          | 0.01                          |
| 5     | 7        | 1.25                | 0.10                          | 0.10                          | 0.10                | 0.01                          | 0.01                          |
| 5     | 8        | 1.34                | 0.11                          | 0.11                          | <0.10               | 0.00                          | 0.01                          |
|       |          |                     | Σ min                         | Σ max                         |                     | Σ min                         | Σ max                         |
| 1     |          |                     | 1.18                          | 1.18                          |                     | 0.19                          | 0.22                          |
| 2     |          |                     | 1.48                          | 1.48                          |                     | 0.08                          | 0.12                          |
| 3     |          |                     | 1.54                          | 1.54                          |                     | 0.80                          | 0.84                          |
| 4     |          |                     | 1.23                          | 1.23                          |                     | 0.12                          | 0.16                          |
| 5     |          |                     | 1.13                          | 1.13                          |                     | 0.39                          | 0.43                          |
| Mean  |          |                     | 1.31                          | 1.31                          |                     | 0.32                          | 0.36                          |
| SD    |          |                     | 0.19                          | 0.19                          |                     | 0.30                          | 0.30                          |

**Table C.** Continued Basalt.

| Stone | Fraction | LAB 1<br>Mn<br>µg/l | min<br>r<br>mg/m <sup>2</sup> | max<br>r<br>mg/m <sup>2</sup> | LAB 2<br>Mn<br>µg/l | min<br>r<br>mg/m <sup>2</sup> | max<br>r<br>mg/m <sup>2</sup> |
|-------|----------|---------------------|-------------------------------|-------------------------------|---------------------|-------------------------------|-------------------------------|
| 1     | 1        | 1.14                | 0.09                          | 0.09                          | 0.47                | 0.04                          | 0.04                          |
| 1     | 2        | 0.38                | 0.03                          | 0.03                          | 0.56                | 0.05                          | 0.05                          |
| 1     | 3        | 0.28                | 0.02                          | 0.02                          | 0.54                | 0.04                          | 0.04                          |
| 1     | 4        | 0.32                | 0.03                          | 0.03                          | 0.44                | 0.03                          | 0.03                          |
| 1     | 5        | 0.46                | 0.04                          | 0.04                          | 0.71                | 0.06                          | 0.06                          |
| 1     | 6        | 0.56                | 0.04                          | 0.04                          | 0.54                | 0.04                          | 0.04                          |
| 1     | 7        | 0.82                | 0.07                          | 0.07                          | 0.35                | 0.03                          | 0.03                          |
| 1     | 8        | 0.76                | 0.06                          | 0.06                          | <0.22               | 0.00                          | 0.02                          |
| 2     | 1        | 1.27                | 0.10                          | 0.10                          | <0.22               | 0.00                          | 0.02                          |
| 2     | 2        | 0.65                | 0.05                          | 0.05                          | <0.22               | 0.00                          | 0.02                          |
| 2     | 3        | 0.43                | 0.03                          | 0.03                          | <0.22               | 0.00                          | 0.02                          |
| 2     | 4        | 0.62                | 0.05                          | 0.05                          | <0.22               | 0.00                          | 0.02                          |
| 2     | 5        | 0.64                | 0.05                          | 0.05                          | <0.22               | 0.00                          | 0.02                          |
| 2     | 6        | 0.66                | 0.05                          | 0.05                          | <0.22               | 0.00                          | 0.02                          |
| 2     | 7        | 0.69                | 0.06                          | 0.06                          | 0.33                | 0.03                          | 0.03                          |
| 2     | 8        | 0.89                | 0.07                          | 0.07                          | <0.22               | 0.00                          | 0.02                          |
| 3     | 1        | 3.23                | 0.26                          | 0.26                          | <0.22               | 0.00                          | 0.02                          |
| 3     | 2        | 0.38                | 0.03                          | 0.03                          | <0.22               | 0.00                          | 0.02                          |
| 3     | 3        | 0.31                | 0.02                          | 0.02                          | <0.22               | 0.00                          | 0.02                          |
| 3     | 4        | 0.30                | 0.02                          | 0.02                          | <0.22               | 0.00                          | 0.02                          |
| 3     | 5        | 0.46                | 0.04                          | 0.04                          | <0.22               | 0.00                          | 0.02                          |
| 3     | 6        | 0.59                | 0.05                          | 0.05                          | 0.37                | 0.03                          | 0.03                          |
| 3     | 7        | 1.11                | 0.09                          | 0.09                          | 1.02                | 0.08                          | 0.08                          |
| 3     | 8        | 1.50                | 0.12                          | 0.12                          | 0.63                | 0.05                          | 0.05                          |
| 4     | 1        | 2.95                | 0.24                          | 0.24                          | <0.22               | 0.00                          | 0.02                          |
| 4     | 2        | 0.36                | 0.03                          | 0.03                          | <0.22               | 0.00                          | 0.02                          |
| 4     | 3        | 0.30                | 0.02                          | 0.02                          | <0.22               | 0.00                          | 0.02                          |
| 4     | 4        | 0.33                | 0.03                          | 0.03                          | <0.22               | 0.00                          | 0.02                          |
| 4     | 5        | 0.39                | 0.03                          | 0.03                          | <0.22               | 0.00                          | 0.02                          |
| 4     | 6        | 0.44                | 0.04                          | 0.04                          | <0.22               | 0.00                          | 0.02                          |
| 4     | 7        | 0.65                | 0.05                          | 0.05                          | <0.22               | 0.00                          | 0.02                          |
| 4     | 8        | 0.63                | 0.05                          | 0.05                          | <0.22               | 0.00                          | 0.02                          |
| 5     | 1        | 1.51                | 0.12                          | 0.12                          | 0.33                | 0.03                          | 0.03                          |
| 5     | 2        | 0.38                | 0.03                          | 0.03                          | <0.22               | 0.00                          | 0.02                          |
| 5     | 3        | 0.32                | 0.03                          | 0.03                          | <0.22               | 0.00                          | 0.02                          |
| 5     | 4        | 0.31                | 0.02                          | 0.02                          | <0.22               | 0.00                          | 0.02                          |
| 5     | 5        | 0.47                | 0.04                          | 0.04                          | 0.39                | 0.03                          | 0.03                          |
| 5     | 6        | 0.58                | 0.05                          | 0.05                          | 0.42                | 0.03                          | 0.03                          |
| 5     | 7        | 0.59                | 0.05                          | 0.05                          | 0.90                | 0.07                          | 0.07                          |
| 5     | 8        | 0.94                | 0.07                          | 0.07                          | 0.75                | 0.06                          | 0.06                          |
|       |          |                     | Σ min                         | Σ max                         |                     | Σ min                         | Σ max                         |
| 1     |          |                     | 0.38                          | 0.38                          |                     | 0.29                          | 0.31                          |
| 2     |          |                     | 0.47                          | 0.47                          |                     | 0.03                          | 0.15                          |
| 3     |          |                     | 0.63                          | 0.63                          |                     | 0.16                          | 0.25                          |
| 4     |          |                     | 0.48                          | 0.48                          |                     | 0.00                          | 0.14                          |
| 5     |          |                     | 0.41                          | 0.41                          |                     | 0.22                          | 0.28                          |
| Mean  |          |                     | 0.47                          | 0.47                          |                     | 0.14                          | 0.22                          |
| SD    |          |                     | 0.10                          | 0.10                          |                     | 0.12                          | 0.08                          |

**Table C.** Continued Basalt.

| Stone | Fraction | LAB 1<br>Mo<br>µg/l | min<br>r<br>mg/m <sup>2</sup> | max<br>r<br>mg/m <sup>2</sup> | LAB 2<br>Mo<br>µg/l | min<br>r<br>mg/m <sup>2</sup> | max<br>r<br>mg/m <sup>2</sup> |
|-------|----------|---------------------|-------------------------------|-------------------------------|---------------------|-------------------------------|-------------------------------|
| 1     | 1        | 0.15                | 0.01                          | 0.01                          | <0.21               | 0.00                          | 0.02                          |
| 1     | 2        | 0.13                | 0.01                          | 0.01                          | <0.21               | 0.00                          | 0.02                          |
| 1     | 3        | 0.08                | 0.01                          | 0.01                          | <0.21               | 0.00                          | 0.02                          |
| 1     | 4        | 0.09                | 0.01                          | 0.01                          | <0.21               | 0.00                          | 0.02                          |
| 1     | 5        | 0.22                | 0.02                          | 0.02                          | <0.21               | 0.00                          | 0.02                          |
| 1     | 6        | 0.29                | 0.02                          | 0.02                          | <0.21               | 0.00                          | 0.02                          |
| 1     | 7        | 0.35                | 0.03                          | 0.03                          | <0.21               | 0.00                          | 0.02                          |
| 1     | 8        | 0.49                | 0.04                          | 0.04                          | <0.21               | 0.00                          | 0.02                          |
| 2     | 1        | <0.06               | 0.00                          | 0.00                          | <0.21               | 0.00                          | 0.02                          |
| 2     | 2        | <0.06               | 0.00                          | 0.00                          | <0.21               | 0.00                          | 0.02                          |
| 2     | 3        | <0.06               | 0.00                          | 0.00                          | <0.21               | 0.00                          | 0.02                          |
| 2     | 4        | 0.07                | 0.01                          | 0.01                          | <0.21               | 0.00                          | 0.02                          |
| 2     | 5        | 0.18                | 0.01                          | 0.01                          | <0.21               | 0.00                          | 0.02                          |
| 2     | 6        | 0.34                | 0.03                          | 0.03                          | <0.21               | 0.00                          | 0.02                          |
| 2     | 7        | 0.53                | 0.04                          | 0.04                          | <0.21               | 0.00                          | 0.02                          |
| 2     | 8        | 1.01                | 0.08                          | 0.08                          | <0.21               | 0.00                          | 0.02                          |
| 3     | 1        | 0.13                | 0.01                          | 0.01                          | <0.21               | 0.00                          | 0.02                          |
| 3     | 2        | 0.12                | 0.01                          | 0.01                          | <0.21               | 0.00                          | 0.02                          |
| 3     | 3        | 0.12                | 0.01                          | 0.01                          | <0.21               | 0.00                          | 0.02                          |
| 3     | 4        | 0.13                | 0.01                          | 0.01                          | <0.21               | 0.00                          | 0.02                          |
| 3     | 5        | 0.31                | 0.02                          | 0.02                          | <0.21               | 0.00                          | 0.02                          |
| 3     | 6        | 0.46                | 0.04                          | 0.04                          | <0.21               | 0.00                          | 0.02                          |
| 3     | 7        | 0.65                | 0.05                          | 0.05                          | <0.21               | 0.00                          | 0.02                          |
| 3     | 8        | 1.17                | 0.09                          | 0.09                          | <0.21               | 0.00                          | 0.02                          |
| 4     | 1        | 0.11                | 0.01                          | 0.01                          | <0.21               | 0.00                          | 0.02                          |
| 4     | 2        | <0.06               | 0.00                          | 0.00                          | <0.21               | 0.00                          | 0.02                          |
| 4     | 3        | <0.06               | 0.00                          | 0.00                          | <0.21               | 0.00                          | 0.02                          |
| 4     | 4        | 0.08                | 0.01                          | 0.01                          | <0.21               | 0.00                          | 0.02                          |
| 4     | 5        | 0.09                | 0.01                          | 0.01                          | <0.21               | 0.00                          | 0.02                          |
| 4     | 6        | 0.12                | 0.01                          | 0.01                          | <0.21               | 0.00                          | 0.02                          |
| 4     | 7        | 0.13                | 0.01                          | 0.01                          | <0.21               | 0.00                          | 0.02                          |
| 4     | 8        | 0.20                | 0.02                          | 0.02                          | <0.21               | 0.00                          | 0.02                          |
| 5     | 1        | 0.12                | 0.01                          | 0.01                          | <0.21               | 0.00                          | 0.02                          |
| 5     | 2        | 0.10                | 0.01                          | 0.01                          | <0.21               | 0.00                          | 0.02                          |
| 5     | 3        | 0.07                | 0.01                          | 0.01                          | <0.21               | 0.00                          | 0.02                          |
| 5     | 4        | 0.09                | 0.01                          | 0.01                          | <0.21               | 0.00                          | 0.02                          |
| 5     | 5        | 0.24                | 0.02                          | 0.02                          | <0.21               | 0.00                          | 0.02                          |
| 5     | 6        | 0.37                | 0.03                          | 0.03                          | <0.21               | 0.00                          | 0.02                          |
| 5     | 7        | 0.55                | 0.04                          | 0.04                          | <0.21               | 0.00                          | 0.02                          |
| 5     | 8        | 0.93                | 0.07                          | 0.07                          | <0.21               | 0.00                          | 0.02                          |
|       |          |                     | Σ min                         | Σ max                         |                     | Σ min                         | Σ max                         |
| 1     |          |                     | 0.14                          | 0.14                          |                     | 0.00                          | 0.13                          |
| 2     |          |                     | 0.17                          | 0.18                          |                     | 0.00                          | 0.13                          |
| 3     |          |                     | 0.25                          | 0.25                          |                     | 0.00                          | 0.13                          |
| 4     |          |                     | 0.06                          | 0.07                          |                     | 0.00                          | 0.13                          |
| 5     |          |                     | 0.20                          | 0.20                          |                     | 0.00                          | 0.13                          |
| Mean  |          |                     | 0.16                          | 0.17                          |                     | 0.00                          | 0.13                          |
| SD    |          |                     | 0.07                          | 0.07                          |                     | 0.00                          | 0.00                          |

**Table C.** Continued Basalt.

| Stone | Fraction | LAB 1<br>Ni<br>µg/l | min<br>r<br>mg/m <sup>2</sup> | max<br>r<br>mg/m <sup>2</sup> | LAB 2<br>Ni<br>µg/l | min<br>r<br>mg/m <sup>2</sup> | max<br>r<br>mg/m <sup>2</sup> |
|-------|----------|---------------------|-------------------------------|-------------------------------|---------------------|-------------------------------|-------------------------------|
| 1     | 1        | 0.180               | 0.014                         | 0.014                         | 0.101               | 0.008                         | 0.008                         |
| 1     | 2        | 0.286               | 0.023                         | 0.023                         | <0.04               | 0.000                         | 0.003                         |
| 1     | 3        | 0.223               | 0.018                         | 0.018                         | <0.04               | 0.000                         | 0.003                         |
| 1     | 4        | 0.245               | 0.020                         | 0.020                         | <0.04               | 0.000                         | 0.003                         |
| 1     | 5        | 0.246               | 0.020                         | 0.020                         | <0.04               | 0.000                         | 0.003                         |
| 1     | 6        | 0.340               | 0.027                         | 0.027                         | <0.04               | 0.000                         | 0.003                         |
| 1     | 7        | 0.354               | 0.028                         | 0.028                         | <0.04               | 0.000                         | 0.003                         |
| 1     | 8        | 0.251               | 0.020                         | 0.020                         | <0.04               | 0.000                         | 0.003                         |
| 2     | 1        | 0.363               | 0.029                         | 0.029                         | <0.04               | 0.000                         | 0.003                         |
| 2     | 2        | 0.594               | 0.048                         | 0.048                         | <0.04               | 0.000                         | 0.003                         |
| 2     | 3        | 0.176               | 0.014                         | 0.014                         | <0.04               | 0.000                         | 0.003                         |
| 2     | 4        | 0.600               | 0.048                         | 0.048                         | <0.04               | 0.000                         | 0.003                         |
| 2     | 5        | 0.511               | 0.041                         | 0.041                         | <0.04               | 0.000                         | 0.003                         |
| 2     | 6        | 0.272               | 0.022                         | 0.022                         | <0.04               | 0.000                         | 0.003                         |
| 2     | 7        | 0.223               | 0.018                         | 0.018                         | <0.04               | 0.000                         | 0.003                         |
| 2     | 8        | 0.260               | 0.021                         | 0.021                         | <0.04               | 0.000                         | 0.003                         |
| 3     | 1        | 0.539               | 0.043                         | 0.043                         | <0.04               | 0.000                         | 0.003                         |
| 3     | 2        | 0.323               | 0.026                         | 0.026                         | <0.04               | 0.000                         | 0.003                         |
| 3     | 3        | 0.235               | 0.019                         | 0.019                         | <0.04               | 0.000                         | 0.003                         |
| 3     | 4        | 0.251               | 0.020                         | 0.020                         | <0.04               | 0.000                         | 0.003                         |
| 3     | 5        | 0.257               | 0.021                         | 0.021                         | <0.04               | 0.000                         | 0.003                         |
| 3     | 6        | 0.330               | 0.026                         | 0.026                         | <0.04               | 0.000                         | 0.003                         |
| 3     | 7        | 0.305               | 0.024                         | 0.024                         | <0.04               | 0.000                         | 0.003                         |
| 3     | 8        | 0.347               | 0.028                         | 0.028                         | <0.04               | 0.000                         | 0.003                         |
| 4     | 1        | 0.451               | 0.036                         | 0.036                         | <0.04               | 0.000                         | 0.003                         |
| 4     | 2        | 0.273               | 0.022                         | 0.022                         | <0.04               | 0.000                         | 0.003                         |
| 4     | 3        | 0.230               | 0.018                         | 0.018                         | <0.04               | 0.000                         | 0.003                         |
| 4     | 4        | 0.231               | 0.018                         | 0.018                         | <0.04               | 0.000                         | 0.003                         |
| 4     | 5        | 0.238               | 0.019                         | 0.019                         | <0.04               | 0.000                         | 0.003                         |
| 4     | 6        | 0.251               | 0.020                         | 0.020                         | <0.04               | 0.000                         | 0.003                         |
| 4     | 7        | 0.294               | 0.024                         | 0.024                         | <0.04               | 0.000                         | 0.003                         |
| 4     | 8        | 0.190               | 0.015                         | 0.015                         | <0.04               | 0.000                         | 0.003                         |
| 5     | 1        | 0.285               | 0.023                         | 0.023                         | <0.04               | 0.000                         | 0.003                         |
| 5     | 2        | 0.360               | 0.029                         | 0.029                         | <0.04               | 0.000                         | 0.003                         |
| 5     | 3        | 0.100               | 0.008                         | 0.008                         | <0.04               | 0.000                         | 0.003                         |
| 5     | 4        | 0.322               | 0.026                         | 0.026                         | <0.04               | 0.000                         | 0.003                         |
| 5     | 5        | 0.382               | 0.031                         | 0.031                         | <0.04               | 0.000                         | 0.003                         |
| 5     | 6        | 0.234               | 0.019                         | 0.019                         | <0.04               | 0.000                         | 0.003                         |
| 5     | 7        | 0.126               | 0.010                         | 0.010                         | <0.04               | 0.000                         | 0.003                         |
| 5     | 8        | 0.208               | 0.017                         | 0.017                         | <0.04               | 0.000                         | 0.003                         |
|       |          |                     | Σ min                         | Σ max                         |                     | Σ min                         | Σ max                         |
| 1     |          |                     | 0.170                         | 0.170                         |                     | 0.008                         | 0.030                         |
| 2     |          |                     | 0.240                         | 0.240                         |                     | 0.000                         | 0.025                         |
| 3     |          |                     | 0.207                         | 0.207                         |                     | 0.000                         | 0.026                         |
| 4     |          |                     | 0.173                         | 0.173                         |                     | 0.000                         | 0.026                         |
| 5     |          |                     | 0.161                         | 0.161                         |                     | 0.000                         | 0.026                         |
| Mean  |          |                     | 0.190                         | 0.190                         |                     | 0.002                         | 0.027                         |
| SD    |          |                     | 0.033                         | 0.033                         |                     | 0.004                         | 0.002                         |

**Table C.** Continued Basalt.

| Stone | Fraction | LAB 1<br>Pb<br>µg/l | min<br>r<br>mg/m <sup>2</sup> | max<br>r<br>mg/m <sup>2</sup> | LAB 2<br>Pb<br>µg/l | min<br>r<br>mg/m <sup>2</sup> | max<br>r<br>mg/m <sup>2</sup> |
|-------|----------|---------------------|-------------------------------|-------------------------------|---------------------|-------------------------------|-------------------------------|
| 1     | 1        | 0.108               | 0.009                         | 0.009                         | 0.093               | 0.007                         | 0.007                         |
| 1     | 2        | 0.104               | 0.008                         | 0.008                         | 0.063               | 0.005                         | 0.005                         |
| 1     | 3        | 0.105               | 0.008                         | 0.008                         | <0.03               | 0.000                         | 0.002                         |
| 1     | 4        | 0.116               | 0.009                         | 0.009                         | <0.03               | 0.000                         | 0.002                         |
| 1     | 5        | 0.168               | 0.013                         | 0.013                         | <0.03               | 0.000                         | 0.002                         |
| 1     | 6        | 0.154               | 0.012                         | 0.012                         | <0.03               | 0.000                         | 0.002                         |
| 1     | 7        | 0.067               | 0.005                         | 0.005                         | <0.03               | 0.000                         | 0.002                         |
| 1     | 8        | <0.03               | 0.000                         | 0.002                         | <0.03               | 0.000                         | 0.002                         |
| 2     | 1        | 0.063               | 0.005                         | 0.005                         | 0.057               | 0.004                         | 0.004                         |
| 2     | 2        | 0.367               | 0.029                         | 0.029                         | <0.03               | 0.000                         | 0.002                         |
| 2     | 3        | 0.124               | 0.010                         | 0.010                         | 0.056               | 0.004                         | 0.004                         |
| 2     | 4        | 0.127               | 0.010                         | 0.010                         | <0.03               | 0.000                         | 0.002                         |
| 2     | 5        | 0.153               | 0.012                         | 0.012                         | <0.03               | 0.000                         | 0.002                         |
| 2     | 6        | 0.105               | 0.008                         | 0.008                         | <0.03               | 0.000                         | 0.002                         |
| 2     | 7        | 0.073               | 0.006                         | 0.006                         | <0.03               | 0.000                         | 0.002                         |
| 2     | 8        | 0.489               | 0.039                         | 0.039                         | <0.03               | 0.000                         | 0.002                         |
| 3     | 1        | 0.107               | 0.009                         | 0.009                         | 0.091               | 0.007                         | 0.007                         |
| 3     | 2        | 0.154               | 0.012                         | 0.012                         | 0.371               | 0.030                         | 0.030                         |
| 3     | 3        | 0.077               | 0.006                         | 0.006                         | 0.079               | 0.006                         | 0.006                         |
| 3     | 4        | 0.080               | 0.006                         | 0.006                         | <0.03               | 0.000                         | 0.002                         |
| 3     | 5        | 0.106               | 0.008                         | 0.008                         | <0.03               | 0.000                         | 0.002                         |
| 3     | 6        | 0.054               | 0.004                         | 0.004                         | <0.03               | 0.000                         | 0.002                         |
| 3     | 7        | 0.050               | 0.004                         | 0.004                         | <0.03               | 0.000                         | 0.002                         |
| 3     | 8        | 0.041               | 0.003                         | 0.003                         | <0.03               | 0.000                         | 0.002                         |
| 4     | 1        | 0.130               | 0.010                         | 0.010                         | <0.03               | 0.000                         | 0.002                         |
| 4     | 2        | 0.222               | 0.018                         | 0.018                         | <0.03               | 0.000                         | 0.002                         |
| 4     | 3        | 0.093               | 0.007                         | 0.007                         | <0.03               | 0.000                         | 0.002                         |
| 4     | 4        | 0.075               | 0.006                         | 0.006                         | <0.03               | 0.000                         | 0.002                         |
| 4     | 5        | 0.077               | 0.006                         | 0.006                         | <0.03               | 0.000                         | 0.002                         |
| 4     | 6        | 0.088               | 0.007                         | 0.007                         | <0.03               | 0.000                         | 0.002                         |
| 4     | 7        | 0.062               | 0.005                         | 0.005                         | <0.03               | 0.000                         | 0.002                         |
| 4     | 8        | <0.03               | 0.000                         | 0.002                         | <0.03               | 0.000                         | 0.002                         |
| 5     | 1        | 0.052               | 0.004                         | 0.004                         | 0.062               | 0.005                         | 0.005                         |
| 5     | 2        | 0.228               | 0.018                         | 0.018                         | <0.03               | 0.000                         | 0.002                         |
| 5     | 3        | 0.071               | 0.006                         | 0.006                         | 0.148               | 0.012                         | 0.012                         |
| 5     | 4        | 0.078               | 0.006                         | 0.006                         | <0.03               | 0.000                         | 0.002                         |
| 5     | 5        | 0.111               | 0.009                         | 0.009                         | <0.03               | 0.000                         | 0.002                         |
| 5     | 6        | 0.084               | 0.007                         | 0.007                         | <0.03               | 0.000                         | 0.002                         |
| 5     | 7        | 0.072               | 0.006                         | 0.006                         | <0.03               | 0.000                         | 0.002                         |
| 5     | 8        | 0.090               | 0.007                         | 0.007                         | <0.03               | 0.000                         | 0.002                         |
|       |          |                     | Σ min                         | Σ max                         |                     | Σ min                         | Σ max                         |
| 1     |          |                     | 0.066                         | 0.068                         |                     | 0.013                         | 0.027                         |
| 2     |          |                     | 0.120                         | 0.120                         |                     | 0.009                         | 0.023                         |
| 3     |          |                     | 0.053                         | 0.053                         |                     | 0.043                         | 0.055                         |
| 4     |          |                     | 0.060                         | 0.062                         |                     | 0.000                         | 0.019                         |
| 5     |          |                     | 0.063                         | 0.063                         |                     | 0.017                         | 0.031                         |
| Mean  |          |                     | 0.072                         | 0.073                         |                     | 0.016                         | 0.031                         |
| SD    |          |                     | 0.027                         | 0.027                         |                     | 0.016                         | 0.014                         |

**Table C.** Continued Basalt.

| Stone | Fraction | LAB 1<br>Sb<br>µg/l | min<br>r<br>mg/m <sup>2</sup> | max<br>r<br>mg/m <sup>2</sup> | LAB 2<br>Sb<br>µg/l | min<br>r<br>mg/m <sup>2</sup> | max<br>r<br>mg/m <sup>2</sup> |
|-------|----------|---------------------|-------------------------------|-------------------------------|---------------------|-------------------------------|-------------------------------|
| 1     | 1        | <0.06               | 0.000                         | 0.005                         | <0.07               | 0.000                         | 0.006                         |
| 1     | 2        | 0.073               | 0.006                         | 0.006                         | <0.07               | 0.000                         | 0.006                         |
| 1     | 3        | 0.070               | 0.006                         | 0.006                         | <0.07               | 0.000                         | 0.006                         |
| 1     | 4        | 0.069               | 0.006                         | 0.006                         | <0.07               | 0.000                         | 0.006                         |
| 1     | 5        | 0.069               | 0.006                         | 0.006                         | <0.07               | 0.000                         | 0.006                         |
| 1     | 6        | 0.094               | 0.008                         | 0.008                         | <0.07               | 0.000                         | 0.006                         |
| 1     | 7        | 0.077               | 0.006                         | 0.006                         | <0.07               | 0.000                         | 0.006                         |
| 1     | 8        | 0.235               | 0.019                         | 0.019                         | <0.07               | 0.000                         | 0.006                         |
| 2     | 1        | <0.06               | 0.000                         | 0.005                         | <0.07               | 0.000                         | 0.006                         |
| 2     | 2        | 0.081               | 0.006                         | 0.006                         | <0.07               | 0.000                         | 0.006                         |
| 2     | 3        | <0.06               | 0.000                         | 0.005                         | <0.07               | 0.000                         | 0.006                         |
| 2     | 4        | 0.080               | 0.006                         | 0.006                         | <0.07               | 0.000                         | 0.006                         |
| 2     | 5        | 0.070               | 0.006                         | 0.006                         | <0.07               | 0.000                         | 0.006                         |
| 2     | 6        | 0.072               | 0.006                         | 0.006                         | <0.07               | 0.000                         | 0.006                         |
| 2     | 7        | <0.06               | 0.000                         | 0.005                         | <0.07               | 0.000                         | 0.006                         |
| 2     | 8        | 0.222               | 0.018                         | 0.018                         | <0.07               | 0.000                         | 0.006                         |
| 3     | 1        | <0.06               | 0.000                         | 0.005                         | <0.07               | 0.000                         | 0.006                         |
| 3     | 2        | 0.072               | 0.006                         | 0.006                         | <0.07               | 0.000                         | 0.006                         |
| 3     | 3        | 0.071               | 0.006                         | 0.006                         | <0.07               | 0.000                         | 0.006                         |
| 3     | 4        | 0.071               | 0.006                         | 0.006                         | <0.07               | 0.000                         | 0.006                         |
| 3     | 5        | 0.072               | 0.006                         | 0.006                         | <0.07               | 0.000                         | 0.006                         |
| 3     | 6        | 0.072               | 0.006                         | 0.006                         | <0.07               | 0.000                         | 0.006                         |
| 3     | 7        | <0.06               | 0.000                         | 0.005                         | <0.07               | 0.000                         | 0.006                         |
| 3     | 8        | 0.201               | 0.016                         | 0.016                         | <0.07               | 0.000                         | 0.006                         |
| 4     | 1        | 0.024               | 0.002                         | 0.002                         | <0.07               | 0.000                         | 0.006                         |
| 4     | 2        | 0.065               | 0.005                         | 0.005                         | <0.07               | 0.000                         | 0.006                         |
| 4     | 3        | 0.068               | 0.005                         | 0.005                         | <0.07               | 0.000                         | 0.006                         |
| 4     | 4        | 0.081               | 0.006                         | 0.006                         | <0.07               | 0.000                         | 0.006                         |
| 4     | 5        | 0.065               | 0.005                         | 0.005                         | <0.07               | 0.000                         | 0.006                         |
| 4     | 6        | 0.079               | 0.006                         | 0.006                         | <0.07               | 0.000                         | 0.006                         |
| 4     | 7        | <0.06               | 0.000                         | 0.005                         | <0.07               | 0.000                         | 0.006                         |
| 4     | 8        | 0.234               | 0.019                         | 0.019                         | <0.07               | 0.000                         | 0.006                         |
| 5     | 1        | <0.06               | 0.000                         | 0.005                         | <0.07               | 0.000                         | 0.006                         |
| 5     | 2        | 0.156               | 0.013                         | 0.013                         | <0.07               | 0.000                         | 0.006                         |
| 5     | 3        | <0.06               | 0.000                         | 0.005                         | <0.07               | 0.000                         | 0.006                         |
| 5     | 4        | 0.077               | 0.006                         | 0.006                         | <0.07               | 0.000                         | 0.006                         |
| 5     | 5        | 0.079               | 0.006                         | 0.006                         | <0.07               | 0.000                         | 0.006                         |
| 5     | 6        | 0.083               | 0.007                         | 0.007                         | <0.07               | 0.000                         | 0.006                         |
| 5     | 7        | <0.06               | 0.000                         | 0.005                         | <0.07               | 0.000                         | 0.006                         |
| 5     | 8        | 0.264               | 0.021                         | 0.021                         | <0.07               | 0.000                         | 0.006                         |
|       |          |                     | Σ min                         | Σ max                         |                     | Σ min                         | Σ max                         |
| 1     |          |                     | 0.055                         | 0.060                         |                     | 0.000                         | 0.045                         |
| 2     |          |                     | 0.042                         | 0.056                         |                     | 0.000                         | 0.044                         |
| 3     |          |                     | 0.045                         | 0.054                         |                     | 0.000                         | 0.045                         |
| 4     |          |                     | 0.049                         | 0.054                         |                     | 0.000                         | 0.045                         |
| 5     |          |                     | 0.053                         | 0.067                         |                     | 0.000                         | 0.045                         |
| Mean  |          |                     | 0.049                         | 0.058                         |                     | 0.000                         | 0.045                         |
| SD    |          |                     | 0.005                         | 0.005                         |                     | 0.000                         | 0.000                         |

**Table C.** Continued Basalt.

| Stone | Fraction | LAB 1<br>Se<br>µg/l | min<br>r<br>mg/m <sup>2</sup> | max<br>r<br>mg/m <sup>2</sup> | LAB 2<br>Se<br>µg/l | min<br>r<br>mg/m <sup>2</sup> | max<br>r<br>mg/m <sup>2</sup> |
|-------|----------|---------------------|-------------------------------|-------------------------------|---------------------|-------------------------------|-------------------------------|
| 1     | 1        | <0.96               | 0.000                         | 0.077                         | <0.04               | 0.000                         | 0.003                         |
| 1     | 2        | <0.96               | 0.000                         | 0.077                         | <0.04               | 0.000                         | 0.003                         |
| 1     | 3        | <0.96               | 0.000                         | 0.077                         | <0.04               | 0.000                         | 0.003                         |
| 1     | 4        | <0.96               | 0.000                         | 0.077                         | <0.04               | 0.000                         | 0.003                         |
| 1     | 5        | <0.96               | 0.000                         | 0.077                         | <0.04               | 0.000                         | 0.003                         |
| 1     | 6        | <0.96               | 0.000                         | 0.077                         | <0.04               | 0.000                         | 0.003                         |
| 1     | 7        | <0.96               | 0.000                         | 0.077                         | <0.04               | 0.000                         | 0.003                         |
| 1     | 8        | <0.96               | 0.000                         | 0.077                         | <0.04               | 0.000                         | 0.003                         |
| 2     | 1        | <0.96               | 0.000                         | 0.076                         | <0.04               | 0.000                         | 0.003                         |
| 2     | 2        | <0.96               | 0.000                         | 0.076                         | <0.04               | 0.000                         | 0.003                         |
| 2     | 3        | <0.96               | 0.000                         | 0.076                         | <0.04               | 0.000                         | 0.003                         |
| 2     | 4        | <0.96               | 0.000                         | 0.076                         | <0.04               | 0.000                         | 0.003                         |
| 2     | 5        | <0.96               | 0.000                         | 0.076                         | <0.04               | 0.000                         | 0.003                         |
| 2     | 6        | <0.96               | 0.000                         | 0.076                         | <0.04               | 0.000                         | 0.003                         |
| 2     | 7        | <0.96               | 0.000                         | 0.076                         | <0.04               | 0.000                         | 0.003                         |
| 2     | 8        | <0.96               | 0.000                         | 0.076                         | <0.04               | 0.000                         | 0.003                         |
| 3     | 1        | <0.96               | 0.000                         | 0.077                         | <0.04               | 0.000                         | 0.003                         |
| 3     | 2        | <0.96               | 0.000                         | 0.077                         | <0.04               | 0.000                         | 0.003                         |
| 3     | 3        | <0.96               | 0.000                         | 0.077                         | <0.04               | 0.000                         | 0.003                         |
| 3     | 4        | <0.96               | 0.000                         | 0.077                         | <0.04               | 0.000                         | 0.003                         |
| 3     | 5        | <0.96               | 0.000                         | 0.077                         | <0.04               | 0.000                         | 0.003                         |
| 3     | 6        | <0.96               | 0.000                         | 0.077                         | <0.04               | 0.000                         | 0.003                         |
| 3     | 7        | <0.96               | 0.000                         | 0.077                         | <0.04               | 0.000                         | 0.003                         |
| 3     | 8        | <0.96               | 0.000                         | 0.077                         | <0.04               | 0.000                         | 0.003                         |
| 4     | 1        | <0.96               | 0.000                         | 0.077                         | <0.04               | 0.000                         | 0.003                         |
| 4     | 2        | <0.96               | 0.000                         | 0.077                         | <0.04               | 0.000                         | 0.003                         |
| 4     | 3        | <0.96               | 0.000                         | 0.077                         | <0.04               | 0.000                         | 0.003                         |
| 4     | 4        | <0.96               | 0.000                         | 0.077                         | <0.04               | 0.000                         | 0.003                         |
| 4     | 5        | <0.96               | 0.000                         | 0.077                         | <0.04               | 0.000                         | 0.003                         |
| 4     | 6        | <0.96               | 0.000                         | 0.077                         | <0.04               | 0.000                         | 0.003                         |
| 4     | 7        | <0.96               | 0.000                         | 0.077                         | <0.04               | 0.000                         | 0.003                         |
| 4     | 8        | <0.96               | 0.000                         | 0.077                         | <0.04               | 0.000                         | 0.003                         |
| 5     | 1        | <0.96               | 0.000                         | 0.077                         | <0.04               | 0.000                         | 0.003                         |
| 5     | 2        | <0.96               | 0.000                         | 0.077                         | <0.04               | 0.000                         | 0.003                         |
| 5     | 3        | <0.96               | 0.000                         | 0.077                         | <0.04               | 0.000                         | 0.003                         |
| 5     | 4        | <0.96               | 0.000                         | 0.077                         | <0.04               | 0.000                         | 0.003                         |
| 5     | 5        | <0.96               | 0.000                         | 0.077                         | <0.04               | 0.000                         | 0.003                         |
| 5     | 6        | <0.96               | 0.000                         | 0.077                         | <0.04               | 0.000                         | 0.003                         |
| 5     | 7        | <0.96               | 0.000                         | 0.077                         | <0.04               | 0.000                         | 0.003                         |
| 5     | 8        | <0.96               | 0.000                         | 0.077                         | <0.04               | 0.000                         | 0.003                         |
|       |          |                     | Σ min                         | Σ max                         |                     | Σ min                         | Σ max                         |
| 1     |          |                     | 0.000                         | 0.614                         |                     | 0.000                         | 0.026                         |
| 2     |          |                     | 0.000                         | 0.605                         |                     | 0.000                         | 0.026                         |
| 3     |          |                     | 0.000                         | 0.615                         |                     | 0.000                         | 0.026                         |
| 4     |          |                     | 0.000                         | 0.615                         |                     | 0.000                         | 0.026                         |
| 5     |          |                     | 0.000                         | 0.615                         |                     | 0.000                         | 0.026                         |
| Mean  |          |                     | 0.000                         | 0.613                         |                     | 0.000                         | 0.026                         |
| SD    |          |                     | 0.000                         | 0.004                         |                     | 0.000                         | 0.000                         |

**Table C.** Continued Basalt.

| Stone | Fraction | LAB 1<br>Sn<br>µg/l | min<br>r<br>mg/m <sup>2</sup> | max<br>r<br>mg/m <sup>2</sup> | LAB 2<br>Sn<br>µg/l | min<br>r<br>mg/m <sup>2</sup> | max<br>r<br>mg/m <sup>2</sup> |
|-------|----------|---------------------|-------------------------------|-------------------------------|---------------------|-------------------------------|-------------------------------|
| 1     | 1        | 0.098               | 0.008                         | 0.008                         | <0.02               | 0.000                         | 0.002                         |
| 1     | 2        | 0.111               | 0.009                         | 0.009                         | <0.02               | 0.000                         | 0.002                         |
| 1     | 3        | 0.048               | 0.004                         | 0.004                         | <0.02               | 0.000                         | 0.002                         |
| 1     | 4        | 0.043               | 0.003                         | 0.003                         | <0.02               | 0.000                         | 0.002                         |
| 1     | 5        | 0.038               | 0.003                         | 0.003                         | <0.02               | 0.000                         | 0.002                         |
| 1     | 6        | 0.053               | 0.004                         | 0.004                         | <0.02               | 0.000                         | 0.002                         |
| 1     | 7        | 0.039               | 0.003                         | 0.003                         | <0.02               | 0.000                         | 0.002                         |
| 1     | 8        | 0.030               | 0.002                         | 0.002                         | <0.02               | 0.000                         | 0.002                         |
| 2     | 1        | 0.100               | 0.008                         | 0.008                         | <0.02               | 0.000                         | 0.002                         |
| 2     | 2        | 0.177               | 0.014                         | 0.014                         | <0.02               | 0.000                         | 0.002                         |
| 2     | 3        | 0.101               | 0.008                         | 0.008                         | <0.02               | 0.000                         | 0.002                         |
| 2     | 4        | 0.242               | 0.019                         | 0.019                         | <0.02               | 0.000                         | 0.002                         |
| 2     | 5        | 0.098               | 0.008                         | 0.008                         | <0.02               | 0.000                         | 0.002                         |
| 2     | 6        | 0.137               | 0.011                         | 0.011                         | <0.02               | 0.000                         | 0.002                         |
| 2     | 7        | 0.093               | 0.007                         | 0.007                         | <0.02               | 0.000                         | 0.002                         |
| 2     | 8        | 0.252               | 0.020                         | 0.020                         | <0.02               | 0.000                         | 0.002                         |
| 3     | 1        | 0.117               | 0.009                         | 0.009                         | <0.02               | 0.000                         | 0.002                         |
| 3     | 2        | 0.112               | 0.009                         | 0.009                         | <0.02               | 0.000                         | 0.002                         |
| 3     | 3        | 0.499               | 0.040                         | 0.040                         | <0.02               | 0.000                         | 0.002                         |
| 3     | 4        | 0.122               | 0.010                         | 0.010                         | <0.02               | 0.000                         | 0.002                         |
| 3     | 5        | 0.065               | 0.005                         | 0.005                         | <0.02               | 0.000                         | 0.002                         |
| 3     | 6        | 0.068               | 0.005                         | 0.005                         | <0.02               | 0.000                         | 0.002                         |
| 3     | 7        | 0.049               | 0.004                         | 0.004                         | <0.02               | 0.000                         | 0.002                         |
| 3     | 8        | 0.047               | 0.004                         | 0.004                         | <0.02               | 0.000                         | 0.002                         |
| 4     | 1        | 0.074               | 0.006                         | 0.006                         | <0.02               | 0.000                         | 0.002                         |
| 4     | 2        | 0.140               | 0.011                         | 0.011                         | <0.02               | 0.000                         | 0.002                         |
| 4     | 3        | 0.047               | 0.004                         | 0.004                         | <0.02               | 0.000                         | 0.002                         |
| 4     | 4        | 0.054               | 0.004                         | 0.004                         | <0.02               | 0.000                         | 0.002                         |
| 4     | 5        | 0.042               | 0.003                         | 0.003                         | <0.02               | 0.000                         | 0.002                         |
| 4     | 6        | 0.056               | 0.004                         | 0.004                         | <0.02               | 0.000                         | 0.002                         |
| 4     | 7        | 0.046               | 0.004                         | 0.004                         | <0.02               | 0.000                         | 0.002                         |
| 4     | 8        | 0.037               | 0.003                         | 0.003                         | <0.02               | 0.000                         | 0.002                         |
| 5     | 1        | 0.064               | 0.005                         | 0.005                         | <0.02               | 0.000                         | 0.002                         |
| 5     | 2        | 0.132               | 0.011                         | 0.011                         | <0.02               | 0.000                         | 0.002                         |
| 5     | 3        | 0.062               | 0.005                         | 0.005                         | <0.02               | 0.000                         | 0.002                         |
| 5     | 4        | 0.105               | 0.008                         | 0.008                         | <0.02               | 0.000                         | 0.002                         |
| 5     | 5        | 0.051               | 0.004                         | 0.004                         | <0.02               | 0.000                         | 0.002                         |
| 5     | 6        | 0.066               | 0.005                         | 0.005                         | <0.02               | 0.000                         | 0.002                         |
| 5     | 7        | 0.035               | 0.003                         | 0.003                         | <0.02               | 0.000                         | 0.002                         |
| 5     | 8        | 0.041               | 0.003                         | 0.003                         | <0.02               | 0.000                         | 0.002                         |
|       |          |                     | Σ min                         | Σ max                         |                     | Σ min                         | Σ max                         |
| 1     |          |                     | 0.037                         | 0.037                         |                     | 0.000                         | 0.013                         |
| 2     |          |                     | 0.096                         | 0.096                         |                     | 0.000                         | 0.013                         |
| 3     |          |                     | 0.086                         | 0.086                         |                     | 0.000                         | 0.013                         |
| 4     |          |                     | 0.040                         | 0.040                         |                     | 0.000                         | 0.013                         |
| 5     |          |                     | 0.044                         | 0.044                         |                     | 0.000                         | 0.013                         |
| Mean  |          |                     | 0.061                         | 0.061                         |                     | 0.000                         | 0.013                         |
| SD    |          |                     | 0.028                         | 0.028                         |                     | 0.000                         | 0.000                         |

**Table C.** Continued Basalt.

| Stone | Fraction | LAB 1<br>Sr<br>µg/l | min<br>r<br>mg/m <sup>2</sup> | max<br>r<br>mg/m <sup>2</sup> | LAB 2<br>Sr<br>µg/l | min<br>r<br>mg/m <sup>2</sup> | max<br>r<br>mg/m <sup>2</sup> |
|-------|----------|---------------------|-------------------------------|-------------------------------|---------------------|-------------------------------|-------------------------------|
| 1     | 1        | 1.43                | 0.11                          | 0.11                          | 5.20                | 0.42                          | 0.42                          |
| 1     | 2        | 6.67                | 0.53                          | 0.53                          | 4.57                | 0.37                          | 0.37                          |
| 1     | 3        | 5.99                | 0.48                          | 0.48                          | 4.20                | 0.34                          | 0.34                          |
| 1     | 4        | 7.20                | 0.58                          | 0.58                          | 4.13                | 0.33                          | 0.33                          |
| 1     | 5        | 7.47                | 0.60                          | 0.60                          | 6.63                | 0.53                          | 0.53                          |
| 1     | 6        | 8.02                | 0.64                          | 0.64                          | 6.72                | 0.54                          | 0.54                          |
| 1     | 7        | 8.89                | 0.71                          | 0.71                          | 11.67               | 0.93                          | 0.93                          |
| 1     | 8        | 8.71                | 0.70                          | 0.70                          | 9.45                | 0.76                          | 0.76                          |
| 2     | 1        | 1.97                | 0.16                          | 0.16                          | 2.57                | 0.20                          | 0.20                          |
| 2     | 2        | 8.37                | 0.67                          | 0.67                          | 1.96                | 0.15                          | 0.15                          |
| 2     | 3        | 1.57                | 0.13                          | 0.13                          | 1.83                | 0.14                          | 0.14                          |
| 2     | 4        | 8.96                | 0.72                          | 0.72                          | 1.82                | 0.14                          | 0.14                          |
| 2     | 5        | 11.42               | 0.91                          | 0.91                          | 2.01                | 0.16                          | 0.16                          |
| 2     | 6        | 12.44               | 1.00                          | 1.00                          | 2.34                | 0.18                          | 0.18                          |
| 2     | 7        | 16.32               | 1.31                          | 1.31                          | 3.89                | 0.31                          | 0.31                          |
| 2     | 8        | 19.68               | 1.57                          | 1.57                          | 3.23                | 0.25                          | 0.25                          |
| 3     | 1        | 2.90                | 0.23                          | 0.23                          | 2.90                | 0.23                          | 0.23                          |
| 3     | 2        | 6.79                | 0.54                          | 0.54                          | 2.53                | 0.20                          | 0.20                          |
| 3     | 3        | 6.62                | 0.53                          | 0.53                          | 2.34                | 0.19                          | 0.19                          |
| 3     | 4        | 7.26                | 0.58                          | 0.58                          | 2.10                | 0.17                          | 0.17                          |
| 3     | 5        | 7.66                | 0.61                          | 0.61                          | 2.54                | 0.20                          | 0.20                          |
| 3     | 6        | 8.46                | 0.68                          | 0.68                          | 3.02                | 0.24                          | 0.24                          |
| 3     | 7        | 5.58                | 0.45                          | 0.45                          | 5.20                | 0.42                          | 0.42                          |
| 3     | 8        | 10.92               | 0.87                          | 0.87                          | 4.21                | 0.34                          | 0.34                          |
| 4     | 1        | 5.72                | 0.46                          | 0.46                          | 2.26                | 0.18                          | 0.18                          |
| 4     | 2        | 6.86                | 0.55                          | 0.55                          | 1.71                | 0.14                          | 0.14                          |
| 4     | 3        | 6.60                | 0.53                          | 0.53                          | 1.57                | 0.13                          | 0.13                          |
| 4     | 4        | 6.70                | 0.54                          | 0.54                          | 1.58                | 0.13                          | 0.13                          |
| 4     | 5        | 7.72                | 0.62                          | 0.62                          | 2.25                | 0.18                          | 0.18                          |
| 4     | 6        | 7.60                | 0.61                          | 0.61                          | 2.71                | 0.22                          | 0.22                          |
| 4     | 7        | 9.14                | 0.73                          | 0.73                          | 6.49                | 0.52                          | 0.52                          |
| 4     | 8        | 8.50                | 0.68                          | 0.68                          | 5.67                | 0.45                          | 0.45                          |
| 5     | 1        | 2.15                | 0.17                          | 0.17                          | 2.45                | 0.20                          | 0.20                          |
| 5     | 2        | 6.45                | 0.52                          | 0.52                          | 2.04                | 0.16                          | 0.16                          |
| 5     | 3        | 0.86                | 0.07                          | 0.07                          | 2.04                | 0.16                          | 0.16                          |
| 5     | 4        | 7.06                | 0.56                          | 0.56                          | 1.78                | 0.14                          | 0.14                          |
| 5     | 5        | 8.37                | 0.67                          | 0.67                          | 1.98                | 0.16                          | 0.16                          |
| 5     | 6        | 8.81                | 0.70                          | 0.70                          | 2.00                | 0.16                          | 0.16                          |
| 5     | 7        | 5.84                | 0.47                          | 0.47                          | 3.23                | 0.26                          | 0.26                          |
| 5     | 8        | 12.07               | 0.97                          | 0.97                          | 3.14                | 0.25                          | 0.25                          |
|       |          |                     | Σ min                         | Σ max                         |                     | Σ min                         | Σ max                         |
| 1     |          |                     | 4.35                          | 4.35                          |                     | 4.20                          | 4.20                          |
| 2     |          |                     | 6.46                          | 6.46                          |                     | 1.55                          | 1.55                          |
| 3     |          |                     | 4.49                          | 4.49                          |                     | 1.99                          | 1.99                          |
| 4     |          |                     | 4.71                          | 4.71                          |                     | 1.94                          | 1.94                          |
| 5     |          |                     | 4.13                          | 4.13                          |                     | 1.49                          | 1.49                          |
| Mean  |          |                     | 4.83                          | 4.83                          |                     | 2.23                          | 2.23                          |
| SD    |          |                     | 0.94                          | 0.94                          |                     | 1.12                          | 1.12                          |

**Table C.** Continued Basalt.

| Stone | Fraction | LAB 1<br>U<br>µg/l | min<br>r<br>mg/m <sup>2</sup> | max<br>r<br>mg/m <sup>2</sup> | LAB 2<br>U<br>µg/l | min<br>r<br>mg/m <sup>2</sup> | max<br>r<br>mg/m <sup>2</sup> |
|-------|----------|--------------------|-------------------------------|-------------------------------|--------------------|-------------------------------|-------------------------------|
| 1     | 1        | <0.04              | 0.0                           | 0.003                         | <0.01              | 0.00                          | 0.0008                        |
| 1     | 2        | <0.04              | 0.0                           | 0.003                         | <0.01              | 0.00                          | 0.0008                        |
| 1     | 3        | <0.04              | 0.0                           | 0.003                         | <0.01              | 0.00                          | 0.0008                        |
| 1     | 4        | <0.04              | 0.0                           | 0.003                         | <0.01              | 0.00                          | 0.0008                        |
| 1     | 5        | <0.04              | 0.0                           | 0.003                         | <0.01              | 0.00                          | 0.0008                        |
| 1     | 6        | <0.04              | 0.0                           | 0.003                         | <0.01              | 0.00                          | 0.0008                        |
| 1     | 7        | <0.04              | 0.0                           | 0.003                         | <0.01              | 0.00                          | 0.0008                        |
| 1     | 8        | <0.04              | 0.0                           | 0.003                         | <0.01              | 0.00                          | 0.0008                        |
| 2     | 1        | <0.04              | 0.0                           | 0.003                         | <0.01              | 0.00                          | 0.0008                        |
| 2     | 2        | <0.04              | 0.0                           | 0.003                         | <0.01              | 0.00                          | 0.0008                        |
| 2     | 3        | <0.04              | 0.0                           | 0.003                         | <0.01              | 0.00                          | 0.0008                        |
| 2     | 4        | <0.04              | 0.0                           | 0.003                         | <0.01              | 0.00                          | 0.0008                        |
| 2     | 5        | <0.04              | 0.0                           | 0.003                         | <0.01              | 0.00                          | 0.0008                        |
| 2     | 6        | <0.04              | 0.0                           | 0.003                         | <0.01              | 0.00                          | 0.0008                        |
| 2     | 7        | <0.04              | 0.0                           | 0.003                         | <0.01              | 0.00                          | 0.0008                        |
| 2     | 8        | <0.04              | 0.0                           | 0.003                         | <0.01              | 0.00                          | 0.0008                        |
| 3     | 1        | <0.04              | 0.0                           | 0.003                         | <0.01              | 0.00                          | 0.0008                        |
| 3     | 2        | <0.04              | 0.0                           | 0.003                         | <0.01              | 0.00                          | 0.0008                        |
| 3     | 3        | <0.04              | 0.0                           | 0.003                         | <0.01              | 0.00                          | 0.0008                        |
| 3     | 4        | <0.04              | 0.0                           | 0.003                         | <0.01              | 0.00                          | 0.0008                        |
| 3     | 5        | <0.04              | 0.0                           | 0.003                         | <0.01              | 0.00                          | 0.0008                        |
| 3     | 6        | <0.04              | 0.0                           | 0.003                         | <0.01              | 0.00                          | 0.0008                        |
| 3     | 7        | <0.04              | 0.0                           | 0.003                         | <0.01              | 0.00                          | 0.0008                        |
| 3     | 8        | <0.04              | 0.0                           | 0.003                         | <0.01              | 0.00                          | 0.0008                        |
| 4     | 1        | <0.04              | 0.0                           | 0.003                         | <0.01              | 0.00                          | 0.0008                        |
| 4     | 2        | <0.04              | 0.0                           | 0.003                         | <0.01              | 0.00                          | 0.0008                        |
| 4     | 3        | <0.04              | 0.0                           | 0.003                         | <0.01              | 0.00                          | 0.0008                        |
| 4     | 4        | <0.04              | 0.0                           | 0.003                         | <0.01              | 0.00                          | 0.0008                        |
| 4     | 5        | <0.04              | 0.0                           | 0.003                         | <0.01              | 0.00                          | 0.0008                        |
| 4     | 6        | <0.04              | 0.0                           | 0.003                         | <0.01              | 0.00                          | 0.0008                        |
| 4     | 7        | <0.04              | 0.0                           | 0.003                         | <0.01              | 0.00                          | 0.0008                        |
| 4     | 8        | <0.04              | 0.0                           | 0.003                         | <0.01              | 0.00                          | 0.0008                        |
| 5     | 1        | <0.04              | 0.0                           | 0.003                         | <0.01              | 0.00                          | 0.0008                        |
| 5     | 2        | <0.04              | 0.0                           | 0.003                         | <0.01              | 0.00                          | 0.0008                        |
| 5     | 3        | <0.04              | 0.0                           | 0.003                         | <0.01              | 0.00                          | 0.0008                        |
| 5     | 4        | <0.04              | 0.0                           | 0.003                         | <0.01              | 0.00                          | 0.0008                        |
| 5     | 5        | <0.04              | 0.0                           | 0.003                         | <0.01              | 0.00                          | 0.0008                        |
| 5     | 6        | <0.04              | 0.0                           | 0.003                         | <0.01              | 0.00                          | 0.0008                        |
| 5     | 7        | <0.04              | 0.0                           | 0.003                         | <0.01              | 0.00                          | 0.0008                        |
| 5     | 8        | <0.04              | 0.0                           | 0.003                         | <0.01              | 0.00                          | 0.0008                        |
|       |          |                    | Σ min                         | Σ max                         |                    | Σ min                         | Σ max                         |
| 1     |          |                    | 0.000                         | 0.026                         |                    | 0.00                          | 0.01                          |
| 2     |          |                    | 0.000                         | 0.026                         |                    | 0.00                          | 0.01                          |
| 3     |          |                    | 0.000                         | 0.026                         |                    | 0.00                          | 0.01                          |
| 4     |          |                    | 0.000                         | 0.026                         |                    | 0.00                          | 0.01                          |
| 5     |          |                    | 0.000                         | 0.026                         |                    | 0.000                         | 0.006                         |
| Mean  |          |                    | 0.000                         | 0.026                         |                    | 0.000                         | 0.006                         |
| SD    |          |                    | 0.000                         | 0.000                         |                    | 0.000                         | 0.000                         |

**Table C.** Continued Basalt.

| Stone | Fraction | LAB 1<br>V<br>µg/l | min<br>r<br>mg/m <sup>2</sup> | max<br>r<br>mg/m <sup>2</sup> | LAB 2<br>V<br>µg/l | min<br>r<br>mg/m <sup>2</sup> | max<br>r<br>mg/m <sup>2</sup> |
|-------|----------|--------------------|-------------------------------|-------------------------------|--------------------|-------------------------------|-------------------------------|
| 1     | 1        | 0.66               | 0.05                          | 0.05                          | 0.43               | 0.03                          | 0.03                          |
| 1     | 2        | 0.60               | 0.05                          | 0.05                          | 0.32               | 0.03                          | 0.03                          |
| 1     | 3        | 0.33               | 0.03                          | 0.03                          | 0.28               | 0.02                          | 0.02                          |
| 1     | 4        | 0.31               | 0.02                          | 0.02                          | 0.24               | 0.02                          | 0.02                          |
| 1     | 5        | 0.57               | 0.05                          | 0.05                          | 0.39               | 0.03                          | 0.03                          |
| 1     | 6        | 0.70               | 0.06                          | 0.06                          | 0.38               | 0.03                          | 0.03                          |
| 1     | 7        | 0.61               | 0.05                          | 0.05                          | 0.15               | 0.01                          | 0.01                          |
| 1     | 8        | 0.92               | 0.07                          | 0.07                          | <0.02              | 0.00                          | 0.00                          |
| 2     | 1        | 0.29               | 0.02                          | 0.02                          | 0.22               | 0.02                          | 0.02                          |
| 2     | 2        | 0.22               | 0.02                          | 0.02                          | 0.12               | 0.01                          | 0.01                          |
| 2     | 3        | 0.14               | 0.01                          | 0.01                          | <0.02              | 0.00                          | 0.00                          |
| 2     | 4        | 0.15               | 0.01                          | 0.01                          | <0.02              | 0.00                          | 0.00                          |
| 2     | 5        | 0.26               | 0.02                          | 0.02                          | 0.10               | 0.01                          | 0.01                          |
| 2     | 6        | 0.35               | 0.03                          | 0.03                          | <0.02              | 0.00                          | 0.00                          |
| 2     | 7        | 0.37               | 0.03                          | 0.03                          | 0.13               | 0.01                          | 0.01                          |
| 2     | 8        | 0.62               | 0.05                          | 0.05                          | <0.02              | 0.00                          | 0.00                          |
| 3     | 1        | 0.59               | 0.05                          | 0.05                          | 0.77               | 0.06                          | 0.06                          |
| 3     | 2        | 0.48               | 0.04                          | 0.04                          | 0.13               | 0.01                          | 0.01                          |
| 3     | 3        | 0.32               | 0.03                          | 0.03                          | <0.02              | 0.00                          | 0.00                          |
| 3     | 4        | 0.30               | 0.02                          | 0.02                          | <0.02              | 0.00                          | 0.00                          |
| 3     | 5        | 0.62               | 0.05                          | 0.05                          | 0.06               | 0.01                          | 0.01                          |
| 3     | 6        | 0.76               | 0.06                          | 0.06                          | 0.21               | 0.02                          | 0.02                          |
| 3     | 7        | 0.82               | 0.07                          | 0.07                          | 0.27               | 0.02                          | 0.02                          |
| 3     | 8        | 1.50               | 0.12                          | 0.12                          | 0.14               | 0.01                          | 0.01                          |
| 4     | 1        | 1.05               | 0.08                          | 0.08                          | <0.02              | 0.00                          | 0.00                          |
| 4     | 2        | 0.50               | 0.04                          | 0.04                          | <0.02              | 0.00                          | 0.00                          |
| 4     | 3        | 0.26               | 0.02                          | 0.02                          | <0.02              | 0.00                          | 0.00                          |
| 4     | 4        | 0.21               | 0.02                          | 0.02                          | <0.02              | 0.00                          | 0.00                          |
| 4     | 5        | 0.36               | 0.03                          | 0.03                          | <0.02              | 0.00                          | 0.00                          |
| 4     | 6        | 0.42               | 0.03                          | 0.03                          | <0.02              | 0.00                          | 0.00                          |
| 4     | 7        | 0.37               | 0.03                          | 0.03                          | 0.25               | 0.02                          | 0.02                          |
| 4     | 8        | 0.59               | 0.05                          | 0.05                          | 0.21               | 0.02                          | 0.02                          |
| 5     | 1        | 1.21               | 0.10                          | 0.10                          | 0.85               | 0.07                          | 0.07                          |
| 5     | 2        | 0.98               | 0.08                          | 0.08                          | 0.43               | 0.03                          | 0.03                          |
| 5     | 3        | 0.51               | 0.04                          | 0.04                          | 0.31               | 0.02                          | 0.02                          |
| 5     | 4        | 0.43               | 0.03                          | 0.03                          | 0.22               | 0.02                          | 0.02                          |
| 5     | 5        | 0.85               | 0.07                          | 0.07                          | 0.62               | 0.05                          | 0.05                          |
| 5     | 6        | 1.09               | 0.09                          | 0.09                          | 0.57               | 0.05                          | 0.05                          |
| 5     | 7        | 0.99               | 0.08                          | 0.08                          | 0.58               | 0.05                          | 0.05                          |
| 5     | 8        | 1.88               | 0.15                          | 0.15                          | 0.41               | 0.03                          | 0.03                          |
|       |          |                    | Σ min                         | Σ max                         |                    | Σ min                         | Σ max                         |
| 1     |          |                    | 0.38                          | 0.38                          |                    | 0.17                          | 0.18                          |
| 2     |          |                    | 0.19                          | 0.19                          |                    | 0.04                          | 0.05                          |
| 3     |          |                    | 0.43                          | 0.43                          |                    | 0.13                          | 0.13                          |
| 4     |          |                    | 0.30                          | 0.30                          |                    | 0.04                          | 0.05                          |
| 5     |          |                    | 0.64                          | 0.64                          |                    | 0.32                          | 0.32                          |
| Mean  |          |                    | 0.39                          | 0.39                          |                    | 0.14                          | 0.14                          |
| SD    |          |                    | 0.17                          | 0.17                          |                    | 0.12                          | 0.11                          |

**Table C.** Continued Basalt.

| Stone | Fraction | LAB 1<br>Zn<br>µg/l | min<br>r<br>mg/m <sup>2</sup> | max<br>r<br>mg/m <sup>2</sup> | LAB 2<br>Zn<br>µg/l | min<br>r<br>mg/m <sup>2</sup> | max<br>r<br>mg/m <sup>2</sup> |
|-------|----------|---------------------|-------------------------------|-------------------------------|---------------------|-------------------------------|-------------------------------|
| 1     | 1        | 0.4                 | 0.0                           | 0.0                           | 2.98                | 0.24                          | 0.24                          |
| 1     | 2        | 296.7               | 23.7                          | 23.7                          | 2.24                | 0.18                          | 0.18                          |
| 1     | 3        | 406.8               | 32.5                          | 32.5                          | 1.40                | 0.11                          | 0.11                          |
| 1     | 4        | 304.5               | 24.4                          | 24.4                          | 1.24                | 0.10                          | 0.10                          |
| 1     | 5        | 305.5               | 24.4                          | 24.4                          | 0.98                | 0.08                          | 0.08                          |
| 1     | 6        | 289.3               | 23.1                          | 23.1                          | 0.64                | 0.05                          | 0.05                          |
| 1     | 7        | 376.6               | 30.1                          | 30.1                          | <0.12               | 0.00                          | 0.01                          |
| 1     | 8        | 322.4               | 25.8                          | 25.8                          | <0.12               | 0.00                          | 0.01                          |
| 2     | 1        | 1.9                 | 0.1                           | 0.1                           | <0.12               | 0.00                          | 0.01                          |
| 2     | 2        | 295.9               | 23.7                          | 23.7                          | <0.12               | 0.00                          | 0.01                          |
| 2     | 3        | 101.5               | 8.1                           | 8.1                           | <0.12               | 0.00                          | 0.01                          |
| 2     | 4        | 389.4               | 31.2                          | 31.2                          | <0.12               | 0.00                          | 0.01                          |
| 2     | 5        | 371.3               | 29.7                          | 29.7                          | <0.12               | 0.00                          | 0.01                          |
| 2     | 6        | 471.8               | 37.7                          | 37.7                          | <0.12               | 0.00                          | 0.01                          |
| 2     | 7        | 445.9               | 35.7                          | 35.7                          | <0.12               | 0.00                          | 0.01                          |
| 2     | 8        | 418.7               | 33.5                          | 33.5                          | <0.12               | 0.00                          | 0.01                          |
| 3     | 1        | 5.0                 | 0.4                           | 0.4                           | 0.26                | 0.02                          | 0.02                          |
| 3     | 2        | 281.3               | 22.5                          | 22.5                          | 5.03                | 0.40                          | 0.40                          |
| 3     | 3        | 297.5               | 23.8                          | 23.8                          | <0.12               | 0.00                          | 0.01                          |
| 3     | 4        | 329.6               | 26.4                          | 26.4                          | <0.12               | 0.00                          | 0.01                          |
| 3     | 5        | 331.2               | 26.5                          | 26.5                          | <0.12               | 0.00                          | 0.01                          |
| 3     | 6        | 455.2               | 36.4                          | 36.4                          | <0.12               | 0.00                          | 0.01                          |
| 3     | 7        | 225.0               | 18.0                          | 18.0                          | <0.12               | 0.00                          | 0.01                          |
| 3     | 8        | 369.7               | 29.6                          | 29.6                          | <0.12               | 0.00                          | 0.01                          |
| 4     | 1        | 0.6                 | 0.0                           | 0.0                           | 0.50                | 0.04                          | 0.04                          |
| 4     | 2        | 455.0               | 36.4                          | 36.4                          | 0.24                | 0.02                          | 0.02                          |
| 4     | 3        | 448.5               | 35.9                          | 35.9                          | 0.13                | 0.01                          | 0.01                          |
| 4     | 4        | 417.4               | 33.4                          | 33.4                          | <0.12               | 0.00                          | 0.01                          |
| 4     | 5        | 328.0               | 26.2                          | 26.2                          | <0.12               | 0.00                          | 0.01                          |
| 4     | 6        | 433.9               | 34.7                          | 34.7                          | <0.12               | 0.00                          | 0.01                          |
| 4     | 7        | 484.7               | 38.8                          | 38.8                          | <0.12               | 0.00                          | 0.01                          |
| 4     | 8        | 327.7               | 26.2                          | 26.2                          | <0.12               | 0.00                          | 0.01                          |
| 5     | 1        | 0.5                 | 0.0                           | 0.0                           | 0.36                | 0.03                          | 0.03                          |
| 5     | 2        | 452.5               | 36.2                          | 36.2                          | 0.15                | 0.01                          | 0.01                          |
| 5     | 3        | 33.3                | 2.7                           | 2.7                           | 3.26                | 0.26                          | 0.26                          |
| 5     | 4        | 278.9               | 22.3                          | 22.3                          | <0.12               | 0.00                          | 0.01                          |
| 5     | 5        | 331.3               | 26.5                          | 26.5                          | 0.47                | 0.04                          | 0.04                          |
| 5     | 6        | 298.1               | 23.8                          | 23.8                          | 0.97                | 0.08                          | 0.08                          |
| 5     | 7        | 146.1               | 11.7                          | 11.7                          | 0.83                | 0.07                          | 0.07                          |
| 5     | 8        | 506.2               | 40.5                          | 40.5                          | 0.41                | 0.03                          | 0.03                          |
|       |          |                     | Σ min                         | Σ max                         |                     | Σ min                         | Σ max                         |
| 1     |          |                     | 184.2                         | 184.2                         |                     | 0.76                          | 0.78                          |
| 2     |          |                     | 199.7                         | 199.7                         |                     | 0.00                          | 0.08                          |
| 3     |          |                     | 183.6                         | 183.6                         |                     | 0.42                          | 0.48                          |
| 4     |          |                     | 231.6                         | 231.6                         |                     | 0.07                          | 0.12                          |
| 5     |          |                     | 163.7                         | 163.7                         |                     | 0.52                          | 0.53                          |
| Mean  |          |                     | 192.6                         | 192.6                         |                     | 0.35                          | 0.40                          |
| SD    |          |                     | 25.3                          | 25.3                          |                     | 0.32                          | 0.30                          |

**Table D.** DSLT results Greywacke (LAB 1 DSLT contract laboratory, LAB 2 DSLT BfG).

| Stone | Fraction | LAB 1<br>Al<br>µg/l | min<br>r<br>mg/m <sup>2</sup> | max<br>r<br>mg/m <sup>2</sup> | LAB 2<br>Al<br>µg/l | min<br>r<br>mg/m <sup>2</sup> | max<br>r<br>mg/m <sup>2</sup> |
|-------|----------|---------------------|-------------------------------|-------------------------------|---------------------|-------------------------------|-------------------------------|
| 1     | 1        | 41.1                | 3.3                           | 3.3                           | <50                 | 0.0                           | 4.0                           |
| 1     | 2        | <40.8               | 0.0                           | 3.3                           | <50                 | 0.0                           | 4.0                           |
| 1     | 3        | <40.8               | 0.0                           | 3.3                           | <50                 | 0.0                           | 4.0                           |
| 1     | 4        | <40.8               | 0.0                           | 3.3                           | <50                 | 0.0                           | 4.0                           |
| 1     | 5        | <40.8               | 0.0                           | 3.3                           | <50                 | 0.0                           | 4.0                           |
| 1     | 6        | <40.8               | 0.0                           | 3.3                           | <50                 | 0.0                           | 4.0                           |
| 1     | 7        | <40.8               | 0.0                           | 3.3                           | <50                 | 0.0                           | 4.0                           |
| 1     | 8        | 76                  | 6.1                           | 6.1                           | <50                 | 0.0                           | 4.0                           |
| 2     | 1        | <40.8               | 0.0                           | 3.3                           | <50                 | 0.0                           | 4.0                           |
| 2     | 2        | <40.8               | 0.0                           | 3.3                           | <50                 | 0.0                           | 4.0                           |
| 2     | 3        | <40.8               | 0.0                           | 3.3                           | <50                 | 0.0                           | 4.0                           |
| 2     | 4        | <40.8               | 0.0                           | 3.3                           | <50                 | 0.0                           | 4.0                           |
| 2     | 5        | <40.8               | 0.0                           | 3.3                           | <50                 | 0.0                           | 4.0                           |
| 2     | 6        | <40.8               | 0.0                           | 3.3                           | <50                 | 0.0                           | 4.0                           |
| 2     | 7        | <40.8               | 0.0                           | 3.3                           | <50                 | 0.0                           | 4.0                           |
| 2     | 8        | 327                 | 26.2                          | 26.2                          | <50                 | 0.0                           | 4.0                           |
| 3     | 1        | <40.8               | 0.0                           | 3.3                           | <50                 | 0.0                           | 4.0                           |
| 3     | 2        | <40.8               | 0.0                           | 3.3                           | <50                 | 0.0                           | 4.0                           |
| 3     | 3        | <40.8               | 0.0                           | 3.3                           | <50                 | 0.0                           | 4.0                           |
| 3     | 4        | <40.8               | 0.0                           | 3.3                           | <50                 | 0.0                           | 4.0                           |
| 3     | 5        | <40.8               | 0.0                           | 3.3                           | <50                 | 0.0                           | 4.0                           |
| 3     | 6        | <40.8               | 0.0                           | 3.3                           | <50                 | 0.0                           | 4.0                           |
| 3     | 7        | <40.8               | 0.0                           | 3.3                           | <50                 | 0.0                           | 4.0                           |
| 3     | 8        | 269                 | 21.5                          | 21.5                          | <50                 | 0.0                           | 4.0                           |
| 4     | 1        | <40.8               | 0.0                           | 3.3                           | <50                 | 0.0                           | 4.0                           |
| 4     | 2        | <40.8               | 0.0                           | 3.3                           | <50                 | 0.0                           | 4.0                           |
| 4     | 3        | <40.8               | 0.0                           | 3.3                           | <50                 | 0.0                           | 4.0                           |
| 4     | 4        | <40.8               | 0.0                           | 3.3                           | <50                 | 0.0                           | 4.0                           |
| 4     | 5        | <40.8               | 0.0                           | 3.3                           | <50                 | 0.0                           | 4.0                           |
| 4     | 6        | <40.8               | 0.0                           | 3.3                           | <50                 | 0.0                           | 4.0                           |
| 4     | 7        | <40.8               | 0.0                           | 3.3                           | <50                 | 0.0                           | 4.0                           |
| 4     | 8        | <40.8               | 0.0                           | 3.3                           | <50                 | 0.0                           | 4.0                           |
| 5     | 1        | <40.8               | 0.0                           | 3.3                           | <50                 | 0.0                           | 4.0                           |
| 5     | 2        | <40.8               | 0.0                           | 3.3                           | <50                 | 0.0                           | 4.0                           |
| 5     | 3        | <40.8               | 0.0                           | 3.3                           | <50                 | 0.0                           | 4.0                           |
| 5     | 4        | <40.8               | 0.0                           | 3.3                           | <50                 | 0.0                           | 4.0                           |
| 5     | 5        | <40.8               | 0.0                           | 3.3                           | <50                 | 0.0                           | 4.0                           |
| 5     | 6        | <40.8               | 0.0                           | 3.3                           | <50                 | 0.0                           | 4.0                           |
| 5     | 7        | <40.8               | 0.0                           | 3.3                           | <50                 | 0.0                           | 4.0                           |
| 5     | 8        | <40.8               | 0.0                           | 3.3                           | <50                 | 0.0                           | 4.0                           |
|       |          |                     | Σ min                         | Σ max                         |                     | Σ min                         | Σ max                         |
| 1     |          |                     | 9.4                           | 28.9                          |                     | 0.0                           | 32.0                          |
| 2     |          |                     | 26.2                          | 49.0                          |                     | 0.0                           | 32.0                          |
| 3     |          |                     | 21.5                          | 44.3                          |                     | 0.0                           | 32.0                          |
| 4     |          |                     | 0.0                           | 26.1                          |                     | 0.0                           | 32.0                          |
| 5     |          |                     | 0.0                           | 26.1                          |                     | 0.0                           | 32.0                          |
| Mean  |          |                     | 11.4                          | 34.9                          |                     | 0.0                           | 32.0                          |
| SD    |          |                     | 12.1                          | 10.9                          |                     | 0.0                           | 0.0                           |

**Table D.** Continued Greywacke.

| Stone | Fraction | LAB 1<br>As<br>µg/l | min<br>r<br>mg/m <sup>2</sup> | max<br>r<br>mg/m <sup>2</sup> | LAB 2<br>As<br>µg/l | min<br>r<br>mg/m <sup>2</sup> | max<br>r<br>mg/m <sup>2</sup> |
|-------|----------|---------------------|-------------------------------|-------------------------------|---------------------|-------------------------------|-------------------------------|
| 1     | 1        | 0.35                | 0.028                         | 0.028                         | 0.10                | 0.01                          | 0.01                          |
| 1     | 2        | 0.25                | 0.020                         | 0.020                         | 0.03                | 0.00                          | 0.00                          |
| 1     | 3        | 0.24                | 0.019                         | 0.019                         | 0.03                | 0.00                          | 0.00                          |
| 1     | 4        | 0.21                | 0.017                         | 0.017                         | 0.03                | 0.00                          | 0.00                          |
| 1     | 5        | 0.41                | 0.033                         | 0.033                         | 0.04                | 0.00                          | 0.00                          |
| 1     | 6        | 0.27                | 0.022                         | 0.022                         | 0.03                | 0.00                          | 0.00                          |
| 1     | 7        | 0.23                | 0.018                         | 0.018                         | 0.03                | 0.00                          | 0.00                          |
| 1     | 8        | 0.27                | 0.022                         | 0.022                         | 0.03                | 0.00                          | 0.00                          |
| 2     | 1        | 0.10                | 0.008                         | 0.008                         | 0.39                | 0.03                          | 0.03                          |
| 2     | 2        | 0.05                | 0.004                         | 0.004                         | 0.16                | 0.01                          | 0.01                          |
| 2     | 3        | 0.04                | 0.003                         | 0.003                         | 0.13                | 0.01                          | 0.01                          |
| 2     | 4        | 0.04                | 0.003                         | 0.003                         | 0.13                | 0.01                          | 0.01                          |
| 2     | 5        | 0.04                | 0.003                         | 0.003                         | 0.20                | 0.02                          | 0.02                          |
| 2     | 6        | 0.04                | 0.003                         | 0.003                         | 0.16                | 0.01                          | 0.01                          |
| 2     | 7        | 0.04                | 0.003                         | 0.003                         | 0.16                | 0.01                          | 0.01                          |
| 2     | 8        | 0.09                | 0.007                         | 0.007                         | 0.12                | 0.01                          | 0.01                          |
| 3     | 1        | 0.11                | 0.009                         | 0.009                         | 0.23                | 0.02                          | 0.02                          |
| 3     | 2        | 0.17                | 0.014                         | 0.014                         | 0.17                | 0.01                          | 0.01                          |
| 3     | 3        | 0.08                | 0.007                         | 0.007                         | 0.12                | 0.01                          | 0.01                          |
| 3     | 4        | 0.09                | 0.008                         | 0.008                         | 0.14                | 0.01                          | 0.01                          |
| 3     | 5        | 0.19                | 0.015                         | 0.015                         | 0.22                | 0.02                          | 0.02                          |
| 3     | 6        | 0.17                | 0.014                         | 0.014                         | 0.23                | 0.02                          | 0.02                          |
| 3     | 7        | 0.22                | 0.018                         | 0.018                         | 0.18                | 0.01                          | 0.01                          |
| 3     | 8        | 0.20                | 0.016                         | 0.016                         | 0.14                | 0.01                          | 0.01                          |
| 4     | 1        | 0.08                | 0.006                         | 0.006                         | 0.29                | 0.02                          | 0.02                          |
| 4     | 2        | 0.10                | 0.008                         | 0.008                         | 0.26                | 0.02                          | 0.02                          |
| 4     | 3        | 0.10                | 0.008                         | 0.008                         | 0.19                | 0.01                          | 0.01                          |
| 4     | 4        | 0.11                | 0.008                         | 0.008                         | 0.16                | 0.01                          | 0.01                          |
| 4     | 5        | 0.23                | 0.018                         | 0.018                         | 0.19                | 0.02                          | 0.02                          |
| 4     | 6        | 0.19                | 0.015                         | 0.015                         | 0.12                | 0.01                          | 0.01                          |
| 4     | 7        | 0.14                | 0.011                         | 0.011                         | 0.09                | 0.01                          | 0.01                          |
| 4     | 8        | 0.14                | 0.011                         | 0.011                         | 0.05                | 0.00                          | 0.00                          |
| 5     | 1        | 0.12                | 0.010                         | 0.010                         | 0.10                | 0.01                          | 0.01                          |
| 5     | 2        | 0.11                | 0.009                         | 0.009                         | 0.03                | 0.002                         | 0.002                         |
| 5     | 3        | 0.04                | 0.003                         | 0.003                         | 0.05                | 0.004                         | 0.004                         |
| 5     | 4        | 0.05                | 0.004                         | 0.004                         | 0.04                | 0.003                         | 0.003                         |
| 5     | 5        | 0.05                | 0.004                         | 0.004                         | 0.05                | 0.004                         | 0.004                         |
| 5     | 6        | 0.04                | 0.003                         | 0.003                         | 0.05                | 0.004                         | 0.004                         |
| 5     | 7        | 0.03                | 0.003                         | 0.003                         | 0.04                | 0.003                         | 0.003                         |
| 5     | 8        | 0.03                | 0.003                         | 0.003                         | 0.05                | 0.004                         | 0.004                         |
|       |          |                     | Σ min                         | Σ max                         |                     | Σ min                         | Σ max                         |
| 1     |          |                     | 0.18                          | 0.18                          |                     | 0.026                         | 0.026                         |
| 2     |          |                     | 0.04                          | 0.04                          |                     | 0.116                         | 0.116                         |
| 3     |          |                     | 0.10                          | 0.10                          |                     | 0.113                         | 0.113                         |
| 4     |          |                     | 0.09                          | 0.09                          |                     | 0.107                         | 0.107                         |
| 5     |          |                     | 0.04                          | 0.04                          |                     | 0.032                         | 0.032                         |
| Mean  |          |                     | 0.088                         | 0.088                         |                     | 0.08                          | 0.08                          |
| SD    |          |                     | 0.059                         | 0.059                         |                     | 0.05                          | 0.05                          |

**Table D.** Continued Greywacke.

| Stone | Fraction | LAB 1<br>Ba<br>µg/l | min<br>r<br>mg/m <sup>2</sup> | max<br>r<br>mg/m <sup>2</sup> | LAB 2<br>Ba<br>µg/l | min<br>r<br>mg/m <sup>2</sup> | max<br>r<br>mg/m <sup>2</sup> |
|-------|----------|---------------------|-------------------------------|-------------------------------|---------------------|-------------------------------|-------------------------------|
| 1     | 1        | 514                 | 41.10                         | 41.10                         | 8.44                | 0.00                          | 0.68                          |
| 1     | 2        | 508                 | 40.68                         | 40.68                         | 8.27                | 0.00                          | 0.66                          |
| 1     | 3        | 485                 | 38.77                         | 38.77                         | 3.64                | 0.29                          | 0.29                          |
| 1     | 4        | 530                 | 42.37                         | 42.37                         | 2.56                | 0.00                          | 0.21                          |
| 1     | 5        | 550                 | 43.97                         | 43.97                         | 2.78                | 0.22                          | 0.22                          |
| 1     | 6        | 466                 | 37.31                         | 37.31                         | 2.63                | 0.21                          | 0.21                          |
| 1     | 7        | 533                 | 42.63                         | 42.63                         | 2.55                | 0.00                          | 0.20                          |
| 1     | 8        | 274                 | 21.92                         | 21.92                         | 1.98                | 0.16                          | 0.16                          |
| 2     | 1        | 484                 | 38.69                         | 38.69                         | 15.8                | 0.00                          | 1.27                          |
| 2     | 2        | 454                 | 36.29                         | 36.29                         | 15.5                | 0.00                          | 1.24                          |
| 2     | 3        | 388                 | 31.05                         | 31.05                         | 4.33                | 0.35                          | 0.35                          |
| 2     | 4        | 491                 | 39.26                         | 39.26                         | 4.17                | 0.33                          | 0.33                          |
| 2     | 5        | 435                 | 34.81                         | 34.81                         | 5.28                | 0.42                          | 0.42                          |
| 2     | 6        | 440                 | 35.22                         | 35.22                         | 5.73                | 0.46                          | 0.46                          |
| 2     | 7        | 466                 | 37.29                         | 37.29                         | 7.22                | 0.58                          | 0.58                          |
| 2     | 8        | 878                 | 70.23                         | 70.23                         | 6.79                | 0.54                          | 0.54                          |
| 3     | 1        | 548                 | 43.81                         | 43.81                         | 15.7                | 1.26                          | 1.26                          |
| 3     | 2        | 474                 | 37.90                         | 37.90                         | 7.76                | 0.62                          | 0.62                          |
| 3     | 3        | 57                  | 4.60                          | 4.60                          | 4.06                | 0.33                          | 0.33                          |
| 3     | 4        | 463                 | 37.04                         | 37.04                         | 4.26                | 0.34                          | 0.34                          |
| 3     | 5        | 498                 | 39.84                         | 39.84                         | 7.01                | 0.56                          | 0.56                          |
| 3     | 6        | 535                 | 42.81                         | 42.81                         | 9.00                | 0.72                          | 0.72                          |
| 3     | 7        | 561                 | 44.88                         | 44.88                         | 14.9                | 1.19                          | 1.19                          |
| 3     | 8        | 911                 | 72.84                         | 72.84                         | 19.7                | 1.58                          | 1.58                          |
| 4     | 1        | 546                 | 43.71                         | 43.71                         | 2.99                | 0.24                          | 0.24                          |
| 4     | 2        | 509                 | 40.71                         | 40.71                         | 1.97                | 0.00                          | 0.16                          |
| 4     | 3        | 461                 | 36.86                         | 36.86                         | 1.06                | 0.00                          | 0.08                          |
| 4     | 4        | 491                 | 39.30                         | 39.30                         | 1.01                | 0.08                          | 0.08                          |
| 4     | 5        | 484                 | 38.73                         | 38.73                         | 1.65                | 0.13                          | 0.13                          |
| 4     | 6        | 613                 | 49.00                         | 49.00                         | 1.92                | 0.15                          | 0.15                          |
| 4     | 7        | 579                 | 46.28                         | 46.28                         | 2.55                | 0.20                          | 0.20                          |
| 4     | 8        | 322                 | 25.77                         | 25.77                         | 2.17                | 0.17                          | 0.17                          |
| 5     | 1        | 546                 | 43.70                         | 43.70                         | 22.5                | 1.80                          | 1.80                          |
| 5     | 2        | 531                 | 42.50                         | 42.50                         | 15.7                | 1.25                          | 1.25                          |
| 5     | 3        | 87                  | 6.99                          | 6.99                          | 7.86                | 0.63                          | 0.63                          |
| 5     | 4        | 477                 | 38.13                         | 38.13                         | 6.11                | 0.49                          | 0.49                          |
| 5     | 5        | 505                 | 40.43                         | 40.43                         | 7.34                | 0.59                          | 0.59                          |
| 5     | 6        | 251                 | 20.05                         | 20.05                         | 5.97                | 0.48                          | 0.48                          |
| 5     | 7        | 603                 | 48.27                         | 48.27                         | 5.77                | 0.46                          | 0.46                          |
| 5     | 8        | 641                 | 51.29                         | 51.29                         | 4.69                | 0.38                          | 0.38                          |
|       |          |                     | Σ min                         | Σ max                         |                     | Σ min                         | Σ max                         |
| 1     |          |                     | 308.7                         | 308.7                         |                     | 0.88                          | 2.63                          |
| 2     |          |                     | 322.9                         | 322.9                         |                     | 2.68                          | 5.19                          |
| 3     |          |                     | 323.7                         | 323.7                         |                     | 6.60                          | 6.60                          |
| 4     |          |                     | 320.4                         | 320.4                         |                     | 0.98                          | 1.23                          |
| 5     |          |                     | 291.4                         | 291.4                         |                     | 6.07                          | 6.07                          |
| Mean  |          |                     | 313.4                         | 313.4                         |                     | 3.44                          | 4.34                          |
| SD    |          |                     | 13.7                          | 13.7                          |                     | 2.74                          | 2.32                          |

**Table D.** Continued Greywacke.

| Stone | Fraction | LAB 1<br>Cd<br>µg/l | min<br>r<br>mg/m <sup>2</sup> | max<br>r<br>mg/m <sup>2</sup> | LAB 2<br>Cd<br>µg/l | min<br>r<br>mg/m <sup>2</sup> | max<br>r<br>mg/m <sup>2</sup> |
|-------|----------|---------------------|-------------------------------|-------------------------------|---------------------|-------------------------------|-------------------------------|
| 1     | 1        | 0.037               | 0.003                         | 0.003                         | <0.01               | 0.000                         | 0.001                         |
| 1     | 2        | 0.034               | 0.003                         | 0.003                         | <0.01               | 0.000                         | 0.001                         |
| 1     | 3        | 0.033               | 0.003                         | 0.003                         | <0.01               | 0.000                         | 0.001                         |
| 1     | 4        | 0.032               | 0.003                         | 0.003                         | <0.01               | 0.000                         | 0.001                         |
| 1     | 5        | 0.039               | 0.003                         | 0.003                         | 0.010               | 0.001                         | 0.001                         |
| 1     | 6        | 0.040               | 0.003                         | 0.003                         | <0.01               | 0.000                         | 0.001                         |
| 1     | 7        | 0.041               | 0.003                         | 0.003                         | 0.015               | 0.001                         | 0.001                         |
| 1     | 8        | 0.027               | 0.002                         | 0.002                         | 0.010               | 0.001                         | 0.001                         |
| 2     | 1        | 0.032               | 0.003                         | 0.003                         | <0.01               | 0.000                         | 0.001                         |
| 2     | 2        | 0.032               | 0.003                         | 0.003                         | <0.01               | 0.000                         | 0.001                         |
| 2     | 3        | 0.028               | 0.002                         | 0.002                         | <0.01               | 0.000                         | 0.001                         |
| 2     | 4        | 0.024               | 0.002                         | 0.002                         | <0.01               | 0.000                         | 0.001                         |
| 2     | 5        | 0.028               | 0.002                         | 0.002                         | <0.01               | 0.000                         | 0.001                         |
| 2     | 6        | 0.023               | 0.002                         | 0.002                         | <0.01               | 0.000                         | 0.001                         |
| 2     | 7        | 0.030               | 0.002                         | 0.002                         | <0.01               | 0.000                         | 0.001                         |
| 2     | 8        | 0.027               | 0.002                         | 0.002                         | <0.01               | 0.000                         | 0.001                         |
| 3     | 1        | 0.039               | 0.003                         | 0.003                         | <0.01               | 0.000                         | 0.001                         |
| 3     | 2        | 0.079               | 0.006                         | 0.006                         | <0.01               | 0.000                         | 0.001                         |
| 3     | 3        | 0.005               | 0.000                         | 0.000                         | <0.01               | 0.000                         | 0.001                         |
| 3     | 4        | 0.031               | 0.002                         | 0.002                         | <0.01               | 0.000                         | 0.001                         |
| 3     | 5        | 0.032               | 0.003                         | 0.003                         | <0.01               | 0.000                         | 0.001                         |
| 3     | 6        | 0.039               | 0.003                         | 0.003                         | <0.01               | 0.000                         | 0.001                         |
| 3     | 7        | 0.035               | 0.003                         | 0.003                         | <0.01               | 0.000                         | 0.001                         |
| 3     | 8        | 0.035               | 0.003                         | 0.003                         | <0.01               | 0.000                         | 0.001                         |
| 4     | 1        | 0.032               | 0.003                         | 0.003                         | <0.01               | 0.000                         | 0.001                         |
| 4     | 2        | 0.034               | 0.003                         | 0.003                         | <0.01               | 0.000                         | 0.001                         |
| 4     | 3        | 0.028               | 0.002                         | 0.002                         | <0.01               | 0.000                         | 0.001                         |
| 4     | 4        | 0.036               | 0.003                         | 0.003                         | <0.01               | 0.000                         | 0.001                         |
| 4     | 5        | 0.040               | 0.003                         | 0.003                         | <0.01               | 0.000                         | 0.001                         |
| 4     | 6        | 0.055               | 0.004                         | 0.004                         | 0.009               | 0.001                         | 0.001                         |
| 4     | 7        | 0.048               | 0.004                         | 0.004                         | <0.01               | 0.000                         | 0.001                         |
| 4     | 8        | 0.028               | 0.002                         | 0.002                         | <0.01               | 0.000                         | 0.001                         |
| 5     | 1        | 0.031               | 0.003                         | 0.003                         | <0.01               | 0.000                         | 0.001                         |
| 5     | 2        | 0.027               | 0.002                         | 0.002                         | <0.01               | 0.000                         | 0.001                         |
| 5     | 3        | <0.01               | 0.000                         | 0.001                         | <0.01               | 0.000                         | 0.001                         |
| 5     | 4        | 0.029               | 0.002                         | 0.002                         | <0.01               | 0.000                         | 0.001                         |
| 5     | 5        | 0.039               | 0.003                         | 0.003                         | <0.01               | 0.000                         | 0.001                         |
| 5     | 6        | 0.030               | 0.002                         | 0.002                         | <0.01               | 0.000                         | 0.001                         |
| 5     | 7        | 0.035               | 0.003                         | 0.003                         | <0.01               | 0.000                         | 0.001                         |
| 5     | 8        | 0.034               | 0.003                         | 0.003                         | <0.01               | 0.000                         | 0.001                         |
|       |          |                     | Σ min                         | Σ max                         |                     | Σ min                         | Σ max                         |
| 1     |          |                     | 0.023                         | 0.023                         |                     | 0.003                         | 0.01                          |
| 2     |          |                     | 0.018                         | 0.018                         |                     | 0.000                         | 0.01                          |
| 3     |          |                     | 0.023                         | 0.023                         |                     | 0.000                         | 0.01                          |
| 4     |          |                     | 0.024                         | 0.024                         |                     | 0.001                         | 0.01                          |
| 5     |          |                     | 0.018                         | 0.019                         |                     | 0.000                         | 0.01                          |
| Mean  |          |                     | 0.021                         | 0.021                         |                     | 0.001                         | 0.01                          |
| SD    |          |                     | 0.003                         | 0.003                         |                     | 0.001                         | 0.00                          |

**Table D.** Continued Greywacke.

| Stone | Fraction | LAB 1<br>Co<br>µg/l | min<br>r<br>mg/m <sup>2</sup> | max<br>r<br>mg/m <sup>2</sup> | LAB 2<br>Co<br>µg/l | min<br>r<br>mg/m <sup>2</sup> | max<br>r<br>mg/m <sup>2</sup> |
|-------|----------|---------------------|-------------------------------|-------------------------------|---------------------|-------------------------------|-------------------------------|
| 1     | 1        | 23.37               | 1.870                         | 1.870                         | 0.106               | 0.008                         | 0.008                         |
| 1     | 2        | 10.38               | 0.831                         | 0.831                         | 0.195               | 0.016                         | 0.016                         |
| 1     | 3        | 9.07                | 0.726                         | 0.726                         | 0.259               | 0.021                         | 0.021                         |
| 1     | 4        | 10.05               | 0.804                         | 0.804                         | 0.227               | 0.018                         | 0.018                         |
| 1     | 5        | 13.99               | 1.119                         | 1.119                         | 0.329               | 0.026                         | 0.026                         |
| 1     | 6        | 10.28               | 0.822                         | 0.822                         | 0.461               | 0.037                         | 0.037                         |
| 1     | 7        | 10.41               | 0.833                         | 0.833                         | 0.665               | 0.053                         | 0.053                         |
| 1     | 8        | 8.24                | 0.659                         | 0.659                         | 0.579               | 0.046                         | 0.046                         |
| 2     | 1        | 0.11                | 0.009                         | 0.009                         | 0.032               | 0.003                         | 0.003                         |
| 2     | 2        | 0.09                | 0.007                         | 0.007                         | 0.059               | 0.005                         | 0.005                         |
| 2     | 3        | 0.08                | 0.006                         | 0.006                         | 0.069               | 0.006                         | 0.006                         |
| 2     | 4        | 0.08                | 0.006                         | 0.006                         | 0.069               | 0.006                         | 0.006                         |
| 2     | 5        | 0.09                | 0.007                         | 0.007                         | 0.100               | 0.008                         | 0.008                         |
| 2     | 6        | 0.08                | 0.006                         | 0.006                         | 0.094               | 0.008                         | 0.008                         |
| 2     | 7        | 0.08                | 0.006                         | 0.006                         | 0.157               | 0.013                         | 0.013                         |
| 2     | 8        | 0.11                | 0.009                         | 0.009                         | 0.137               | 0.011                         | 0.011                         |
| 3     | 1        | 0.10                | 0.008                         | 0.008                         | 0.039               | 0.003                         | 0.003                         |
| 3     | 2        | 0.15                | 0.012                         | 0.012                         | 0.039               | 0.003                         | 0.003                         |
| 3     | 3        | 0.03                | 0.002                         | 0.002                         | 0.033               | 0.003                         | 0.003                         |
| 3     | 4        | 0.08                | 0.007                         | 0.007                         | 0.027               | 0.002                         | 0.002                         |
| 3     | 5        | 0.10                | 0.008                         | 0.008                         | 0.038               | 0.003                         | 0.003                         |
| 3     | 6        | 0.11                | 0.008                         | 0.008                         | 0.038               | 0.003                         | 0.003                         |
| 3     | 7        | 0.09                | 0.008                         | 0.008                         | 0.074               | 0.006                         | 0.006                         |
| 3     | 8        | 0.14                | 0.011                         | 0.011                         | 0.082               | 0.007                         | 0.007                         |
| 4     | 1        | 1.82                | 0.145                         | 0.145                         | 0.058               | 0.005                         | 0.005                         |
| 4     | 2        | 1.42                | 0.113                         | 0.113                         | 0.098               | 0.008                         | 0.008                         |
| 4     | 3        | 1.46                | 0.117                         | 0.117                         | 0.078               | 0.006                         | 0.006                         |
| 4     | 4        | 1.33                | 0.107                         | 0.107                         | 0.130               | 0.010                         | 0.010                         |
| 4     | 5        | 1.82                | 0.146                         | 0.146                         | 0.222               | 0.018                         | 0.018                         |
| 4     | 6        | 1.02                | 0.081                         | 0.081                         | 0.251               | 0.020                         | 0.020                         |
| 4     | 7        | 0.76                | 0.061                         | 0.061                         | 0.290               | 0.023                         | 0.023                         |
| 4     | 8        | 0.67                | 0.053                         | 0.053                         | 0.218               | 0.017                         | 0.017                         |
| 5     | 1        | 0.17                | 0.013                         | 0.013                         | 0.013               | 0.001                         | 0.001                         |
| 5     | 2        | 0.11                | 0.009                         | 0.009                         | 0.021               | 0.002                         | 0.002                         |
| 5     | 3        | 0.02                | 0.002                         | 0.002                         | 0.017               | 0.001                         | 0.001                         |
| 5     | 4        | 0.08                | 0.006                         | 0.006                         | 0.012               | 0.001                         | 0.001                         |
| 5     | 5        | 0.12                | 0.009                         | 0.009                         | <0.01               | 0.000                         | 0.001                         |
| 5     | 6        | 0.09                | 0.008                         | 0.008                         | <0.01               | 0.000                         | 0.001                         |
| 5     | 7        | 0.09                | 0.007                         | 0.007                         | <0.01               | 0.000                         | 0.001                         |
| 5     | 8        | 0.15                | 0.012                         | 0.012                         | <0.01               | 0.000                         | 0.001                         |
|       |          |                     | Σ min                         | Σ max                         |                     | Σ min                         | Σ max                         |
| 1     |          |                     | 7.664                         | 7.664                         |                     | 0.226                         | 0.226                         |
| 2     |          |                     | 0.057                         | 0.057                         |                     | 0.057                         | 0.057                         |
| 3     |          |                     | 0.065                         | 0.065                         |                     | 0.030                         | 0.030                         |
| 4     |          |                     | 0.823                         | 0.823                         |                     | 0.107                         | 0.107                         |
| 5     |          |                     | 0.066                         | 0.066                         |                     | 0.005                         | 0.008                         |
| Mean  |          |                     | 1.735                         | 1.735                         |                     | 0.085                         | 0.086                         |
| SD    |          |                     | 3.331                         | 3.331                         |                     | 0.087                         | 0.087                         |

**Table D.** Continued Greywacke.

| Stone | Fraction | LAB 1<br>Cr<br>µg/l | min<br>r<br>mg/m <sup>2</sup> | max<br>r<br>mg/m <sup>2</sup> | LAB 2<br>Cr<br>µg/l | min<br>r<br>mg/m <sup>2</sup> | max<br>r<br>mg/m <sup>2</sup> |
|-------|----------|---------------------|-------------------------------|-------------------------------|---------------------|-------------------------------|-------------------------------|
| 1     | 1        | 0.188               | 0.015                         | 0.015                         | 0.041               | 0.003                         | 0.003                         |
| 1     | 2        | 0.087               | 0.007                         | 0.007                         | 0.019               | 0.002                         | 0.002                         |
| 1     | 3        | 0.080               | 0.006                         | 0.006                         | 0.013               | 0.001                         | 0.001                         |
| 1     | 4        | 0.089               | 0.007                         | 0.007                         | 0.011               | 0.001                         | 0.001                         |
| 1     | 5        | 0.093               | 0.007                         | 0.007                         | 0.012               | 0.001                         | 0.001                         |
| 1     | 6        | 0.078               | 0.006                         | 0.006                         | 0.023               | 0.002                         | 0.002                         |
| 1     | 7        | 0.066               | 0.005                         | 0.005                         | 0.014               | 0.001                         | 0.001                         |
| 1     | 8        | 0.067               | 0.005                         | 0.005                         | 0.027               | 0.002                         | 0.002                         |
| 2     | 1        | 0.087               | 0.007                         | 0.007                         | 0.025               | 0.002                         | 0.002                         |
| 2     | 2        | 0.075               | 0.006                         | 0.006                         | 0.021               | 0.002                         | 0.002                         |
| 2     | 3        | 0.075               | 0.006                         | 0.006                         | 0.008               | 0.001                         | 0.001                         |
| 2     | 4        | 0.074               | 0.006                         | 0.006                         | 0.008               | 0.001                         | 0.001                         |
| 2     | 5        | 0.072               | 0.006                         | 0.006                         | 0.012               | 0.001                         | 0.001                         |
| 2     | 6        | 0.075               | 0.006                         | 0.006                         | 0.013               | 0.001                         | 0.001                         |
| 2     | 7        | 0.080               | 0.006                         | 0.006                         | 0.011               | 0.001                         | 0.001                         |
| 2     | 8        | 0.308               | 0.025                         | 0.025                         | 0.028               | 0.002                         | 0.002                         |
| 3     | 1        | 0.219               | 0.017                         | 0.017                         | 0.034               | 0.003                         | 0.003                         |
| 3     | 2        | 0.138               | 0.011                         | 0.011                         | 0.013               | 0.001                         | 0.001                         |
| 3     | 3        | 0.018               | 0.001                         | 0.001                         | 0.010               | 0.001                         | 0.001                         |
| 3     | 4        | 0.089               | 0.007                         | 0.007                         | <0.01               | 0.000                         | 0.001                         |
| 3     | 5        | 0.107               | 0.009                         | 0.009                         | 0.011               | 0.001                         | 0.001                         |
| 3     | 6        | 0.167               | 0.013                         | 0.013                         | 0.012               | 0.001                         | 0.001                         |
| 3     | 7        | 0.080               | 0.006                         | 0.006                         | 0.016               | 0.001                         | 0.001                         |
| 3     | 8        | 0.262               | 0.021                         | 0.021                         | 0.040               | 0.003                         | 0.003                         |
| 4     | 1        | 0.107               | 0.009                         | 0.009                         | 0.075               | 0.006                         | 0.006                         |
| 4     | 2        | 0.102               | 0.008                         | 0.008                         | 0.021               | 0.002                         | 0.002                         |
| 4     | 3        | 0.072               | 0.006                         | 0.006                         | 0.022               | 0.002                         | 0.002                         |
| 4     | 4        | 0.065               | 0.005                         | 0.005                         | 0.010               | 0.001                         | 0.001                         |
| 4     | 5        | 0.057               | 0.005                         | 0.005                         | 0.013               | 0.001                         | 0.001                         |
| 4     | 6        | 0.084               | 0.007                         | 0.007                         | 0.017               | 0.001                         | 0.001                         |
| 4     | 7        | 0.064               | 0.005                         | 0.005                         | 0.012               | 0.001                         | 0.001                         |
| 4     | 8        | <0.06               | 0.000                         | 0.005                         | 0.030               | 0.002                         | 0.002                         |
| 5     | 1        | 0.102               | 0.008                         | 0.008                         | 0.363               | 0.029                         | 0.029                         |
| 5     | 2        | 0.113               | 0.009                         | 0.009                         | 0.024               | 0.002                         | 0.002                         |
| 5     | 3        | 0.013               | 0.001                         | 0.001                         | <0.01               | 0.000                         | 0.001                         |
| 5     | 4        | 0.068               | 0.005                         | 0.005                         | <0.01               | 0.000                         | 0.001                         |
| 5     | 5        | 0.104               | 0.008                         | 0.008                         | 0.010               | 0.001                         | 0.001                         |
| 5     | 6        | 0.271               | 0.022                         | 0.022                         | 0.016               | 0.001                         | 0.001                         |
| 5     | 7        | 0.077               | 0.006                         | 0.006                         | 0.022               | 0.002                         | 0.002                         |
| 5     | 8        | 0.060               | 0.005                         | 0.005                         | 0.041               | 0.003                         | 0.003                         |
|       |          |                     | Σ min                         | Σ max                         |                     | Σ min                         | Σ max                         |
| 1     |          |                     | 0.060                         | 0.060                         |                     | 0.013                         | 0.013                         |
| 2     |          |                     | 0.068                         | 0.068                         |                     | 0.010                         | 0.010                         |
| 3     |          |                     | 0.086                         | 0.086                         |                     | 0.011                         | 0.012                         |
| 4     |          |                     | 0.044                         | 0.049                         |                     | 0.016                         | 0.016                         |
| 5     |          |                     | 0.065                         | 0.065                         |                     | 0.038                         | 0.040                         |
| Mean  |          |                     | 0.064                         | 0.065                         |                     | 0.018                         | 0.018                         |
| SD    |          |                     | 0.015                         | 0.014                         |                     | 0.012                         | 0.012                         |

**Table D.** Continued Greywacke.

| Stone | Fraction | LAB 1<br>Cu<br>µg/l | min<br>r<br>mg/m <sup>2</sup> | max<br>r<br>mg/m <sup>2</sup> | LAB 2<br>Cu<br>µg/l | min<br>r<br>mg/m <sup>2</sup> | max<br>r<br>mg/m <sup>2</sup> |
|-------|----------|---------------------|-------------------------------|-------------------------------|---------------------|-------------------------------|-------------------------------|
| 1     | 1        | 7.232               | 0.579                         | 0.579                         | 0.040               | 0.003                         | 0.003                         |
| 1     | 2        | 2.658               | 0.213                         | 0.213                         | 0.079               | 0.006                         | 0.006                         |
| 1     | 3        | 2.581               | 0.206                         | 0.206                         | 0.032               | 0.003                         | 0.003                         |
| 1     | 4        | 3.858               | 0.309                         | 0.309                         | 0.034               | 0.003                         | 0.003                         |
| 1     | 5        | 4.050               | 0.324                         | 0.324                         | 0.047               | 0.004                         | 0.004                         |
| 1     | 6        | 3.243               | 0.259                         | 0.259                         | 0.037               | 0.003                         | 0.003                         |
| 1     | 7        | 2.870               | 0.230                         | 0.230                         | 0.039               | 0.003                         | 0.003                         |
| 1     | 8        | 1.609               | 0.129                         | 0.129                         | 0.053               | 0.004                         | 0.004                         |
| 2     | 1        | 3.305               | 0.264                         | 0.264                         | 0.404               | 0.032                         | 0.032                         |
| 2     | 2        | 2.856               | 0.228                         | 0.228                         | 0.028               | 0.002                         | 0.002                         |
| 2     | 3        | 2.014               | 0.161                         | 0.161                         | <0.02               | 0.000                         | 0.002                         |
| 2     | 4        | 1.651               | 0.132                         | 0.132                         | <0.02               | 0.000                         | 0.002                         |
| 2     | 5        | 1.948               | 0.156                         | 0.156                         | 0.028               | 0.002                         | 0.002                         |
| 2     | 6        | 1.792               | 0.143                         | 0.143                         | 0.038               | 0.003                         | 0.003                         |
| 2     | 7        | 1.713               | 0.137                         | 0.137                         | 0.032               | 0.003                         | 0.003                         |
| 2     | 8        | 1.067               | 0.085                         | 0.085                         | 0.053               | 0.004                         | 0.004                         |
| 3     | 1        | 6.733               | 0.539                         | 0.539                         | 0.059               | 0.005                         | 0.005                         |
| 3     | 2        | 2.569               | 0.206                         | 0.206                         | 0.021               | 0.002                         | 0.002                         |
| 3     | 3        | 1.000               | 0.080                         | 0.080                         | <0.02               | 0.000                         | 0.002                         |
| 3     | 4        | 3.858               | 0.309                         | 0.309                         | <0.02               | 0.000                         | 0.002                         |
| 3     | 5        | 3.892               | 0.311                         | 0.311                         | 0.023               | 0.002                         | 0.002                         |
| 3     | 6        | 4.507               | 0.361                         | 0.361                         | 0.024               | 0.002                         | 0.002                         |
| 3     | 7        | 2.835               | 0.227                         | 0.227                         | 0.048               | 0.004                         | 0.004                         |
| 3     | 8        | 2.851               | 0.228                         | 0.228                         | 0.047               | 0.004                         | 0.004                         |
| 4     | 1        | 5.534               | 0.443                         | 0.443                         | 0.039               | 0.003                         | 0.003                         |
| 4     | 2        | 3.817               | 0.305                         | 0.305                         | 0.027               | 0.002                         | 0.002                         |
| 4     | 3        | 2.274               | 0.182                         | 0.182                         | <0.02               | 0.000                         | 0.002                         |
| 4     | 4        | 2.659               | 0.213                         | 0.213                         | 0.021               | 0.002                         | 0.002                         |
| 4     | 5        | 2.576               | 0.206                         | 0.206                         | 0.023               | 0.002                         | 0.002                         |
| 4     | 6        | 3.194               | 0.256                         | 0.256                         | 0.027               | 0.002                         | 0.002                         |
| 4     | 7        | 2.641               | 0.211                         | 0.211                         | 0.054               | 0.004                         | 0.004                         |
| 4     | 8        | 1.805               | 0.144                         | 0.144                         | 0.042               | 0.003                         | 0.003                         |
| 5     | 1        | 5.567               | 0.445                         | 0.445                         | 0.100               | 0.008                         | 0.008                         |
| 5     | 2        | 2.196               | 0.176                         | 0.176                         | 0.024               | 0.002                         | 0.002                         |
| 5     | 3        | 0.870               | 0.070                         | 0.070                         | <0.02               | 0.002                         | 0.002                         |
| 5     | 4        | 3.500               | 0.280                         | 0.280                         | 0.030               | 0.002                         | 0.002                         |
| 5     | 5        | 4.227               | 0.338                         | 0.338                         | 0.039               | 0.003                         | 0.003                         |
| 5     | 6        | 3.319               | 0.266                         | 0.266                         | 0.051               | 0.004                         | 0.004                         |
| 5     | 7        | 3.132               | 0.251                         | 0.251                         | 0.039               | 0.003                         | 0.003                         |
| 5     | 8        | 2.269               | 0.182                         | 0.182                         | 0.025               | 0.002                         | 0.002                         |
|       |          |                     | Σ min                         | Σ max                         |                     | Σ min                         | Σ max                         |
| 1     |          |                     | 2.248                         | 2.248                         |                     | 0.029                         | 0.029                         |
| 2     |          |                     | 1.308                         | 1.308                         |                     | 0.047                         | 0.050                         |
| 3     |          |                     | 2.260                         | 2.260                         |                     | 0.018                         | 0.021                         |
| 4     |          |                     | 1.960                         | 1.960                         |                     | 0.019                         | 0.020                         |
| 5     |          |                     | 2.006                         | 2.006                         |                     | 0.026                         | 0.026                         |
| Mean  |          |                     | 1.956                         | 1.956                         |                     | 0.028                         | 0.029                         |
| SD    |          |                     | 0.387                         | 0.387                         |                     | 0.012                         | 0.012                         |

**Table D.** Continued Greywacke.

| Stone | Fraction | LAB 1<br>Mn<br>µg/l | min<br>r<br>mg/m <sup>2</sup> | max<br>r<br>mg/m <sup>2</sup> | LAB 2<br>Mn<br>µg/l | min<br>r<br>mg/m <sup>2</sup> | max<br>r<br>mg/m <sup>2</sup> |
|-------|----------|---------------------|-------------------------------|-------------------------------|---------------------|-------------------------------|-------------------------------|
| 1     | 1        | 25.07               | 2.01                          | 2.01                          | 12.91               | 1.03                          | 1.03                          |
| 1     | 2        | 12.78               | 1.02                          | 1.02                          | 13.06               | 1.05                          | 1.05                          |
| 1     | 3        | 9.76                | 0.78                          | 0.78                          | 10.88               | 0.87                          | 0.87                          |
| 1     | 4        | 13.07               | 1.05                          | 1.05                          | 10.84               | 0.87                          | 0.87                          |
| 1     | 5        | 32.63               | 2.61                          | 2.61                          | 17.05               | 1.37                          | 1.37                          |
| 1     | 6        | 32.19               | 2.58                          | 2.58                          | 19.84               | 1.59                          | 1.59                          |
| 1     | 7        | 56.39               | 4.51                          | 4.51                          | 29.93               | 2.40                          | 2.40                          |
| 1     | 8        | 69.93               | 5.59                          | 5.59                          | 27.53               | 2.20                          | 2.20                          |
| 2     | 1        | 4.30                | 0.34                          | 0.34                          | 11.32               | 0.91                          | 0.91                          |
| 2     | 2        | 1.69                | 0.13                          | 0.13                          | 15.61               | 1.25                          | 1.25                          |
| 2     | 3        | 0.82                | 0.07                          | 0.07                          | 8.42                | 0.67                          | 0.67                          |
| 2     | 4        | 0.77                | 0.06                          | 0.06                          | 7.25                | 0.58                          | 0.58                          |
| 2     | 5        | 1.12                | 0.09                          | 0.09                          | 8.06                | 0.64                          | 0.64                          |
| 2     | 6        | 1.45                | 0.12                          | 0.12                          | 6.81                | 0.54                          | 0.54                          |
| 2     | 7        | 1.04                | 0.08                          | 0.08                          | 8.52                | 0.68                          | 0.68                          |
| 2     | 8        | 2.87                | 0.23                          | 0.23                          | 7.37                | 0.59                          | 0.59                          |
| 3     | 1        | 8.73                | 0.70                          | 0.70                          | 12.62               | 1.01                          | 1.01                          |
| 3     | 2        | 6.26                | 0.50                          | 0.50                          | 11.94               | 0.96                          | 0.96                          |
| 3     | 3        | 6.98                | 0.56                          | 0.56                          | 6.55                | 0.52                          | 0.52                          |
| 3     | 4        | 5.56                | 0.44                          | 0.44                          | 5.31                | 0.43                          | 0.43                          |
| 3     | 5        | 9.61                | 0.77                          | 0.77                          | 4.94                | 0.40                          | 0.40                          |
| 3     | 6        | 10.25               | 0.82                          | 0.82                          | 3.19                | 0.26                          | 0.26                          |
| 3     | 7        | 11.38               | 0.91                          | 0.91                          | 3.86                | 0.31                          | 0.31                          |
| 3     | 8        | 18.74               | 1.50                          | 1.50                          | 4.65                | 0.37                          | 0.37                          |
| 4     | 1        | 23.25               | 1.86                          | 1.86                          | 9.98                | 0.80                          | 0.80                          |
| 4     | 2        | 19.40               | 1.55                          | 1.55                          | 8.85                | 0.71                          | 0.71                          |
| 4     | 3        | 22.43               | 1.79                          | 1.79                          | 6.59                | 0.53                          | 0.53                          |
| 4     | 4        | 21.05               | 1.68                          | 1.68                          | 9.72                | 0.78                          | 0.78                          |
| 4     | 5        | 40.67               | 3.25                          | 3.25                          | 14.88               | 1.19                          | 1.19                          |
| 4     | 6        | 35.64               | 2.85                          | 2.85                          | 13.95               | 1.12                          | 1.12                          |
| 4     | 7        | 42.65               | 3.41                          | 3.41                          | 13.34               | 1.07                          | 1.07                          |
| 4     | 8        | 38.09               | 3.05                          | 3.05                          | 10.94               | 0.87                          | 0.87                          |
| 5     | 1        | 17.35               | 1.39                          | 1.39                          | 11.83               | 0.95                          | 0.95                          |
| 5     | 2        | 12.24               | 0.98                          | 0.98                          | 13.51               | 1.08                          | 1.08                          |
| 5     | 3        | 9.22                | 0.74                          | 0.74                          | 6.87                | 0.55                          | 0.55                          |
| 5     | 4        | 5.82                | 0.47                          | 0.47                          | 4.15                | 0.33                          | 0.33                          |
| 5     | 5        | 7.79                | 0.62                          | 0.62                          | 1.85                | 0.15                          | 0.15                          |
| 5     | 6        | 11.16               | 0.89                          | 0.89                          | 0.61                | 0.05                          | 0.05                          |
| 5     | 7        | 17.85               | 1.43                          | 1.43                          | <0.46               | 0.00                          | 0.04                          |
| 5     | 8        | 38.13               | 3.05                          | 3.05                          | <0.46               | 0.00                          | 0.04                          |
|       |          |                     | Σ min                         | Σ max                         |                     | Σ min                         | Σ max                         |
| 1     |          |                     | 20.15                         | 20.15                         |                     | 11.37                         | 11.37                         |
| 2     |          |                     | 1.12                          | 1.12                          |                     | 5.87                          | 5.87                          |
| 3     |          |                     | 6.20                          | 6.20                          |                     | 4.25                          | 4.25                          |
| 4     |          |                     | 19.45                         | 19.45                         |                     | 7.06                          | 7.06                          |
| 5     |          |                     | 9.56                          | 9.56                          |                     | 3.11                          | 3.18                          |
| Mean  |          |                     | 11.30                         | 11.30                         |                     | 6.33                          | 6.35                          |
| SD    |          |                     | 8.33                          | 8.33                          |                     | 3.20                          | 3.18                          |

**Table D.** Continued Greywacke.

| Stone | Fraction | LAB 1<br>Mo<br>µg/l | min<br>r<br>mg/m <sup>2</sup> | max<br>r<br>mg/m <sup>2</sup> | LAB 2<br>Mo<br>µg/l | min<br>r<br>mg/m <sup>2</sup> | max<br>r<br>mg/m <sup>2</sup> |
|-------|----------|---------------------|-------------------------------|-------------------------------|---------------------|-------------------------------|-------------------------------|
| 1     | 1        | 0.159               | 0.013                         | 0.013                         | 0.879               | 0.070                         | 0.070                         |
| 1     | 2        | 0.081               | 0.007                         | 0.007                         | 0.424               | 0.034                         | 0.034                         |
| 1     | 3        | 0.056               | 0.004                         | 0.004                         | 0.331               | 0.027                         | 0.027                         |
| 1     | 4        | <0.06               | 0.000                         | 0.005                         | 0.282               | 0.023                         | 0.023                         |
| 1     | 5        | <0.06               | 0.000                         | 0.005                         | 0.661               | 0.053                         | 0.053                         |
| 1     | 6        | <0.06               | 0.000                         | 0.005                         | 0.730               | 0.059                         | 0.059                         |
| 1     | 7        | <0.06               | 0.000                         | 0.005                         | 1.403               | 0.112                         | 0.112                         |
| 1     | 8        | <0.06               | 0.000                         | 0.005                         | 1.515               | 0.121                         | 0.121                         |
| 2     | 1        | 0.637               | 0.051                         | 0.051                         | 0.275               | 0.022                         | 0.022                         |
| 2     | 2        | 0.203               | 0.016                         | 0.016                         | 0.137               | 0.011                         | 0.011                         |
| 2     | 3        | 0.096               | 0.008                         | 0.008                         | 0.076               | 0.006                         | 0.006                         |
| 2     | 4        | <0.06               | 0.000                         | 0.005                         | 0.100               | 0.008                         | 0.008                         |
| 2     | 5        | <0.06               | 0.000                         | 0.005                         | 0.152               | 0.012                         | 0.012                         |
| 2     | 6        | <0.06               | 0.000                         | 0.005                         | 0.184               | 0.015                         | 0.015                         |
| 2     | 7        | <0.06               | 0.000                         | 0.005                         | 0.282               | 0.023                         | 0.023                         |
| 2     | 8        | 0.057               | 0.005                         | 0.005                         | 0.296               | 0.024                         | 0.024                         |
| 3     | 1        | 0.124               | 0.010                         | 0.010                         | 0.987               | 0.079                         | 0.079                         |
| 3     | 2        | 0.115               | 0.009                         | 0.009                         | 0.333               | 0.027                         | 0.027                         |
| 3     | 3        | <0.06               | 0.000                         | 0.005                         | 0.301               | 0.024                         | 0.024                         |
| 3     | 4        | <0.06               | 0.000                         | 0.005                         | 0.340               | 0.027                         | 0.027                         |
| 3     | 5        | <0.06               | 0.000                         | 0.005                         | 0.554               | 0.044                         | 0.044                         |
| 3     | 6        | <0.06               | 0.000                         | 0.005                         | 0.602               | 0.048                         | 0.048                         |
| 3     | 7        | <0.06               | 0.000                         | 0.005                         | 1.005               | 0.080                         | 0.080                         |
| 3     | 8        | 0.066               | 0.005                         | 0.005                         | 0.908               | 0.073                         | 0.073                         |
| 4     | 1        | 0.277               | 0.022                         | 0.022                         | 0.200               | 0.016                         | 0.016                         |
| 4     | 2        | 0.262               | 0.021                         | 0.021                         | 0.092               | 0.007                         | 0.007                         |
| 4     | 3        | 0.278               | 0.022                         | 0.022                         | 0.042               | 0.003                         | 0.003                         |
| 4     | 4        | 0.294               | 0.024                         | 0.024                         | 0.028               | 0.002                         | 0.002                         |
| 4     | 5        | 0.611               | 0.049                         | 0.049                         | 0.064               | 0.005                         | 0.005                         |
| 4     | 6        | 0.533               | 0.043                         | 0.043                         | 0.070               | 0.006                         | 0.006                         |
| 4     | 7        | 0.894               | 0.072                         | 0.072                         | 0.135               | 0.011                         | 0.011                         |
| 4     | 8        | 1.066               | 0.085                         | 0.085                         | 0.111               | 0.009                         | 0.009                         |
| 5     | 1        | 0.289               | 0.023                         | 0.023                         | 0.635               | 0.051                         | 0.051                         |
| 5     | 2        | <0.06               | 0.000                         | 0.005                         | 0.272               | 0.022                         | 0.022                         |
| 5     | 3        | <0.06               | 0.000                         | 0.005                         | 0.168               | 0.013                         | 0.013                         |
| 5     | 4        | <0.06               | 0.000                         | 0.005                         | 0.154               | 0.012                         | 0.012                         |
| 5     | 5        | 0.056               | 0.004                         | 0.004                         | 0.184               | 0.015                         | 0.015                         |
| 5     | 6        | <0.06               | 0.000                         | 0.005                         | 0.251               | 0.020                         | 0.020                         |
| 5     | 7        | <0.06               | 0.000                         | 0.005                         | 0.341               | 0.027                         | 0.027                         |
| 5     | 8        | 0.058               | 0.005                         | 0.005                         | 0.386               | 0.031                         | 0.031                         |
|       |          |                     | Σ min                         | Σ max                         |                     | Σ min                         | Σ max                         |
| 1     |          |                     | 0.024                         | 0.048                         |                     | 0.499                         | 0.499                         |
| 2     |          |                     | 0.079                         | 0.099                         |                     | 0.120                         | 0.120                         |
| 3     |          |                     | 0.024                         | 0.048                         |                     | 0.403                         | 0.403                         |
| 4     |          |                     | 0.337                         | 0.337                         |                     | 0.059                         | 0.059                         |
| 5     |          |                     | 0.032                         | 0.056                         |                     | 0.191                         | 0.191                         |
| Mean  |          |                     | 0.099                         | 0.118                         |                     | 0.254                         | 0.254                         |
| SD    |          |                     | 0.135                         | 0.125                         |                     | 0.188                         | 0.188                         |

**Table D.** Continued Greywacke.

| Stone | Fraction | LAB 1<br>Ni<br>µg/l | min<br>r<br>mg/m <sup>2</sup> | max<br>r<br>mg/m <sup>2</sup> | LAB 2<br>Ni<br>µg/l | min<br>r<br>mg/m <sup>2</sup> | max<br>r<br>mg/m <sup>2</sup> |
|-------|----------|---------------------|-------------------------------|-------------------------------|---------------------|-------------------------------|-------------------------------|
| 1     | 1        | 5.77                | 0.462                         | 0.462                         | 0.068               | 0.005                         | 0.005                         |
| 1     | 2        | 2.71                | 0.217                         | 0.217                         | 0.100               | 0.008                         | 0.008                         |
| 1     | 3        | 2.57                | 0.206                         | 0.206                         | 0.098               | 0.008                         | 0.008                         |
| 1     | 4        | 3.15                | 0.252                         | 0.252                         | 0.121               | 0.010                         | 0.010                         |
| 1     | 5        | 7.33                | 0.587                         | 0.587                         | 0.153               | 0.012                         | 0.012                         |
| 1     | 6        | 3.94                | 0.315                         | 0.315                         | 0.235               | 0.019                         | 0.019                         |
| 1     | 7        | 4.39                | 0.351                         | 0.351                         | 0.373               | 0.030                         | 0.030                         |
| 1     | 8        | 3.65                | 0.292                         | 0.292                         | 0.347               | 0.028                         | 0.028                         |
| 2     | 1        | 0.33                | 0.026                         | 0.026                         | 0.177               | 0.014                         | 0.014                         |
| 2     | 2        | 0.30                | 0.024                         | 0.024                         | 0.058               | 0.005                         | 0.005                         |
| 2     | 3        | 0.24                | 0.019                         | 0.019                         | 0.043               | 0.003                         | 0.003                         |
| 2     | 4        | 0.24                | 0.019                         | 0.019                         | 0.023               | 0.002                         | 0.002                         |
| 2     | 5        | 0.27                | 0.021                         | 0.021                         | 0.039               | 0.003                         | 0.003                         |
| 2     | 6        | 0.23                | 0.019                         | 0.019                         | 0.046               | 0.004                         | 0.004                         |
| 2     | 7        | 0.23                | 0.018                         | 0.018                         | 0.085               | 0.007                         | 0.007                         |
| 2     | 8        | 0.19                | 0.015                         | 0.015                         | 0.114               | 0.009                         | 0.009                         |
| 3     | 1        | 0.51                | 0.041                         | 0.041                         | 0.074               | 0.006                         | 0.006                         |
| 3     | 2        | 0.45                | 0.036                         | 0.036                         | 0.044               | 0.004                         | 0.004                         |
| 3     | 3        | 0.17                | 0.013                         | 0.013                         | 0.044               | 0.004                         | 0.004                         |
| 3     | 4        | 0.41                | 0.033                         | 0.033                         | 0.091               | 0.007                         | 0.007                         |
| 3     | 5        | 0.68                | 0.054                         | 0.054                         | 0.044               | 0.004                         | 0.004                         |
| 3     | 6        | 0.31                | 0.025                         | 0.025                         | 0.034               | 0.003                         | 0.003                         |
| 3     | 7        | 0.37                | 0.030                         | 0.030                         | 0.072               | 0.006                         | 0.006                         |
| 3     | 8        | 0.31                | 0.025                         | 0.025                         | 0.100               | 0.008                         | 0.008                         |
| 4     | 1        | 1.30                | 0.104                         | 0.104                         | 0.106               | 0.009                         | 0.009                         |
| 4     | 2        | 0.94                | 0.076                         | 0.076                         | 0.089               | 0.007                         | 0.007                         |
| 4     | 3        | 0.88                | 0.070                         | 0.070                         | 0.055               | 0.004                         | 0.004                         |
| 4     | 4        | 0.77                | 0.062                         | 0.062                         | 0.045               | 0.004                         | 0.004                         |
| 4     | 5        | 1.05                | 0.084                         | 0.084                         | 0.099               | 0.008                         | 0.008                         |
| 4     | 6        | 0.85                | 0.068                         | 0.068                         | 0.118               | 0.009                         | 0.009                         |
| 4     | 7        | 0.62                | 0.050                         | 0.050                         | 0.149               | 0.012                         | 0.012                         |
| 4     | 8        | 0.51                | 0.041                         | 0.041                         | 0.159               | 0.013                         | 0.013                         |
| 5     | 1        | 0.78                | 0.062                         | 0.062                         | 0.204               | 0.016                         | 0.016                         |
| 5     | 2        | 0.53                | 0.042                         | 0.042                         | 0.028               | 0.002                         | 0.002                         |
| 5     | 3        | 0.14                | 0.011                         | 0.011                         | <0.02               | 0.000                         | 0.002                         |
| 5     | 4        | 0.44                | 0.035                         | 0.035                         | <0.02               | 0.000                         | 0.002                         |
| 5     | 5        | 2.34                | 0.187                         | 0.187                         | <0.02               | 0.000                         | 0.002                         |
| 5     | 6        | 0.40                | 0.032                         | 0.032                         | <0.02               | 0.000                         | 0.002                         |
| 5     | 7        | 0.32                | 0.026                         | 0.026                         | <0.02               | 0.000                         | 0.002                         |
| 5     | 8        | 0.34                | 0.027                         | 0.027                         | <0.02               | 0.000                         | 0.002                         |
|       |          |                     | Σ min                         | Σ max                         |                     | Σ min                         | Σ max                         |
| 1     |          |                     | 2.682                         | 2.682                         |                     | 0.120                         | 0.120                         |
| 2     |          |                     | 0.162                         | 0.162                         |                     | 0.047                         | 0.047                         |
| 3     |          |                     | 0.257                         | 0.257                         |                     | 0.040                         | 0.040                         |
| 4     |          |                     | 0.555                         | 0.555                         |                     | 0.066                         | 0.066                         |
| 5     |          |                     | 0.424                         | 0.424                         |                     | 0.019                         | 0.028                         |
| Mean  |          |                     | 0.816                         | 0.816                         |                     | 0.058                         | 0.060                         |
| SD    |          |                     | 1.054                         | 1.054                         |                     | 0.038                         | 0.036                         |

**Table D.** Continued Greywacke.

| Stone | Fraction | LAB 1<br>Pb<br>µg/l | min<br>r<br>mg/m <sup>2</sup> | max<br>r<br>mg/m <sup>2</sup> | LAB 2<br>Pb<br>µg/l | min<br>r<br>mg/m <sup>2</sup> | max<br>r<br>mg/m <sup>2</sup> |
|-------|----------|---------------------|-------------------------------|-------------------------------|---------------------|-------------------------------|-------------------------------|
| 1     | 1        | 0.72                | 0.058                         | 0.058                         | 0.02                | 0.001                         | 0.001                         |
| 1     | 2        | 0.13                | 0.010                         | 0.010                         | 0.10                | 0.008                         | 0.008                         |
| 1     | 3        | 0.11                | 0.009                         | 0.009                         | 0.03                | 0.002                         | 0.002                         |
| 1     | 4        | 0.06                | 0.005                         | 0.005                         | 0.01                | 0.001                         | 0.001                         |
| 1     | 5        | 0.16                | 0.013                         | 0.013                         | 0.01                | 0.001                         | 0.001                         |
| 1     | 6        | 0.36                | 0.029                         | 0.029                         | 0.01                | 0.001                         | 0.001                         |
| 1     | 7        | 0.38                | 0.030                         | 0.030                         | 0.01                | 0.001                         | 0.001                         |
| 1     | 8        | 0.21                | 0.017                         | 0.017                         | 0.01                | 0.001                         | 0.001                         |
| 2     | 1        | 0.14                | 0.011                         | 0.011                         | 0.06                | 0.005                         | 0.005                         |
| 2     | 2        | 0.07                | 0.006                         | 0.006                         | 0.10                | 0.008                         | 0.008                         |
| 2     | 3        | 0.07                | 0.006                         | 0.006                         | 0.20                | 0.016                         | 0.016                         |
| 2     | 4        | 0.07                | 0.006                         | 0.006                         | 0.12                | 0.009                         | 0.009                         |
| 2     | 5        | 0.09                | 0.007                         | 0.007                         | 0.13                | 0.010                         | 0.010                         |
| 2     | 6        | 0.10                | 0.008                         | 0.008                         | 0.21                | 0.017                         | 0.017                         |
| 2     | 7        | 0.06                | 0.005                         | 0.005                         | 0.25                | 0.020                         | 0.020                         |
| 2     | 8        | 0.10                | 0.008                         | 0.008                         | 0.29                | 0.023                         | 0.023                         |
| 3     | 1        | 1.53                | 0.123                         | 0.123                         | 0.02                | 0.001                         | 0.001                         |
| 3     | 2        | 0.07                | 0.006                         | 0.006                         | 0.03                | 0.002                         | 0.002                         |
| 3     | 3        | 0.08                | 0.006                         | 0.006                         | 0.01                | 0.001                         | 0.001                         |
| 3     | 4        | 0.96                | 0.077                         | 0.077                         | 0.01                | 0.001                         | 0.001                         |
| 3     | 5        | 0.17                | 0.013                         | 0.013                         | 0.01                | 0.001                         | 0.001                         |
| 3     | 6        | 0.24                | 0.019                         | 0.019                         | 0.01                | 0.001                         | 0.001                         |
| 3     | 7        | 0.05                | 0.004                         | 0.004                         | 0.02                | 0.001                         | 0.001                         |
| 3     | 8        | 0.10                | 0.008                         | 0.008                         | 0.02                | 0.002                         | 0.002                         |
| 4     | 1        | 1.35                | 0.108                         | 0.108                         | 0.04                | 0.003                         | 0.003                         |
| 4     | 2        | 0.42                | 0.034                         | 0.034                         | 0.05                | 0.004                         | 0.004                         |
| 4     | 3        | 0.41                | 0.033                         | 0.033                         | 0.09                | 0.007                         | 0.007                         |
| 4     | 4        | 0.33                | 0.027                         | 0.027                         | 0.03                | 0.003                         | 0.003                         |
| 4     | 5        | 0.54                | 0.043                         | 0.043                         | 0.03                | 0.002                         | 0.002                         |
| 4     | 6        | 0.47                | 0.038                         | 0.038                         | 0.03                | 0.002                         | 0.002                         |
| 4     | 7        | 0.06                | 0.005                         | 0.005                         | 0.04                | 0.003                         | 0.003                         |
| 4     | 8        | 0.03                | 0.002                         | 0.002                         | 0.10                | 0.008                         | 0.008                         |
| 5     | 1        | 0.27                | 0.022                         | 0.022                         | 0.02                | 0.002                         | 0.002                         |
| 5     | 2        | 0.14                | 0.011                         | 0.011                         | 0.02                | 0.002                         | 0.002                         |
| 5     | 3        | 0.04                | 0.003                         | 0.003                         | 0.01                | 0.001                         | 0.001                         |
| 5     | 4        | 0.06                | 0.005                         | 0.005                         | 0.01                | 0.001                         | 0.001                         |
| 5     | 5        | 0.12                | 0.010                         | 0.010                         | 0.01                | 0.001                         | 0.001                         |
| 5     | 6        | 0.21                | 0.017                         | 0.017                         | 0.02                | 0.002                         | 0.002                         |
| 5     | 7        | 0.06                | 0.005                         | 0.005                         | 0.07                | 0.006                         | 0.006                         |
| 5     | 8        | 0.04                | 0.003                         | 0.003                         | 0.02                | 0.002                         | 0.002                         |
|       |          |                     | Σ min                         | Σ max                         |                     | Σ min                         | Σ max                         |
| 1     |          |                     | 0.171                         | 0.171                         |                     | 0.02                          | 0.02                          |
| 2     |          |                     | 0.057                         | 0.057                         |                     | 0.11                          | 0.11                          |
| 3     |          |                     | 0.256                         | 0.256                         |                     | 0.01                          | 0.01                          |
| 4     |          |                     | 0.290                         | 0.290                         |                     | 0.03                          | 0.03                          |
| 5     |          |                     | 0.076                         | 0.076                         |                     | 0.02                          | 0.02                          |
| Mean  |          |                     | 0.170                         | 0.170                         |                     | 0.04                          | 0.04                          |
| SD    |          |                     | 0.104                         | 0.104                         |                     | 0.04                          | 0.04                          |

**Table D.** Continued Greywacke.

| Stone | Fraction | LAB 1<br>Sb<br>µg/l | min<br>r<br>mg/m <sup>2</sup> | max<br>r<br>mg/m <sup>2</sup> | LAB 2<br>Sb<br>µg/l | min<br>r<br>mg/m <sup>2</sup> | max<br>r<br>mg/m <sup>2</sup> |
|-------|----------|---------------------|-------------------------------|-------------------------------|---------------------|-------------------------------|-------------------------------|
| 1     | 1        | 0.15                | 0.012                         | 0.012                         | 0.04                | 0.003                         | 0.003                         |
| 1     | 2        | 0.19                | 0.015                         | 0.015                         | 0.05                | 0.004                         | 0.004                         |
| 1     | 3        | 0.17                | 0.013                         | 0.013                         | 0.05                | 0.004                         | 0.004                         |
| 1     | 4        | 0.17                | 0.013                         | 0.013                         | 0.04                | 0.003                         | 0.003                         |
| 1     | 5        | 0.23                | 0.018                         | 0.018                         | 0.05                | 0.004                         | 0.004                         |
| 1     | 6        | 0.16                | 0.013                         | 0.013                         | 0.07                | 0.006                         | 0.006                         |
| 1     | 7        | 0.14                | 0.012                         | 0.012                         | 0.09                | 0.008                         | 0.008                         |
| 1     | 8        | 0.24                | 0.019                         | 0.019                         | 0.09                | 0.007                         | 0.007                         |
| 2     | 1        | 0.07                | 0.006                         | 0.006                         | 0.08                | 0.006                         | 0.006                         |
| 2     | 2        | 0.10                | 0.008                         | 0.008                         | 0.07                | 0.005                         | 0.005                         |
| 2     | 3        | 0.08                | 0.007                         | 0.007                         | 0.07                | 0.005                         | 0.005                         |
| 2     | 4        | 0.07                | 0.006                         | 0.006                         | 0.06                | 0.005                         | 0.005                         |
| 2     | 5        | 0.09                | 0.007                         | 0.007                         | 0.10                | 0.008                         | 0.008                         |
| 2     | 6        | 0.07                | 0.006                         | 0.006                         | 0.10                | 0.008                         | 0.008                         |
| 2     | 7        | 0.08                | 0.006                         | 0.006                         | 0.15                | 0.012                         | 0.012                         |
| 2     | 8        | 0.19                | 0.015                         | 0.015                         | 0.14                | 0.011                         | 0.011                         |
| 3     | 1        | 0.09                | 0.008                         | 0.008                         | 0.07                | 0.005                         | 0.005                         |
| 3     | 2        | 0.14                | 0.011                         | 0.011                         | 0.06                | 0.005                         | 0.005                         |
| 3     | 3        | <0.06               | 0.0                           | 0.005                         | 0.06                | 0.004                         | 0.004                         |
| 3     | 4        | 0.08                | 0.006                         | 0.006                         | 0.05                | 0.004                         | 0.004                         |
| 3     | 5        | 0.12                | 0.010                         | 0.010                         | 0.08                | 0.006                         | 0.006                         |
| 3     | 6        | 0.11                | 0.009                         | 0.009                         | 0.08                | 0.006                         | 0.006                         |
| 3     | 7        | 0.10                | 0.008                         | 0.008                         | 0.10                | 0.008                         | 0.008                         |
| 3     | 8        | 0.20                | 0.016                         | 0.016                         | 0.10                | 0.008                         | 0.008                         |
| 4     | 1        | 0.13                | 0.011                         | 0.011                         | 0.14                | 0.011                         | 0.011                         |
| 4     | 2        | 0.12                | 0.009                         | 0.009                         | 0.13                | 0.010                         | 0.010                         |
| 4     | 3        | 0.16                | 0.013                         | 0.013                         | 0.11                | 0.009                         | 0.009                         |
| 4     | 4        | 0.12                | 0.010                         | 0.010                         | 0.10                | 0.008                         | 0.008                         |
| 4     | 5        | 0.16                | 0.013                         | 0.013                         | 0.13                | 0.011                         | 0.011                         |
| 4     | 6        | 0.20                | 0.016                         | 0.016                         | 0.13                | 0.010                         | 0.010                         |
| 4     | 7        | 0.16                | 0.013                         | 0.013                         | 0.17                | 0.014                         | 0.014                         |
| 4     | 8        | 0.39                | 0.031                         | 0.031                         | 0.15                | 0.012                         | 0.012                         |
| 5     | 1        | 0.12                | 0.010                         | 0.010                         | 0.06                | 0.005                         | 0.005                         |
| 5     | 2        | 0.08                | 0.006                         | 0.006                         | 0.04                | 0.003                         | 0.003                         |
| 5     | 3        | <0.06               | 0.0                           | 0.005                         | 0.03                | 0.003                         | 0.003                         |
| 5     | 4        | 0.09                | 0.007                         | 0.007                         | 0.03                | 0.003                         | 0.003                         |
| 5     | 5        | 0.11                | 0.009                         | 0.009                         | 0.05                | 0.004                         | 0.004                         |
| 5     | 6        | 0.09                | 0.008                         | 0.008                         | 0.05                | 0.004                         | 0.004                         |
| 5     | 7        | 0.07                | 0.006                         | 0.006                         | 0.08                | 0.007                         | 0.007                         |
| 5     | 8        | 0.23                | 0.019                         | 0.019                         | 0.08                | 0.007                         | 0.007                         |
|       |          |                     | Σ min                         | Σ max                         |                     | Σ min                         | Σ max                         |
| 1     |          |                     | 0.115                         | 0.115                         |                     | 0.04                          | 0.04                          |
| 2     |          |                     | 0.060                         | 0.060                         |                     | 0.06                          | 0.06                          |
| 3     |          |                     | 0.068                         | 0.072                         |                     | 0.05                          | 0.05                          |
| 4     |          |                     | 0.115                         | 0.115                         |                     | 0.08                          | 0.08                          |
| 5     |          |                     | 0.064                         | 0.069                         |                     | 0.03                          | 0.03                          |
| Mean  |          |                     | 0.085                         | 0.087                         |                     | 0.05                          | 0.05                          |
| SD    |          |                     | 0.028                         | 0.027                         |                     | 0.02                          | 0.02                          |

**Table D.** Continued Greywacke.

| Stone | Fraction | LAB 1<br>Se<br>µg/l | min<br>r<br>mg/m <sup>2</sup> | max<br>r<br>mg/m <sup>2</sup> | LAB 2<br>Se<br>µg/l | min<br>r<br>mg/m <sup>2</sup> | max<br>r<br>mg/m <sup>2</sup> |
|-------|----------|---------------------|-------------------------------|-------------------------------|---------------------|-------------------------------|-------------------------------|
| 1     | 1        | 0.06                | 0.005                         | 0.005                         | <0.07               | 0.000                         | 0.006                         |
| 1     | 2        | 0.05                | 0.004                         | 0.004                         | <0.07               | 0.000                         | 0.006                         |
| 1     | 3        | 0.05                | 0.004                         | 0.004                         | <0.07               | 0.000                         | 0.006                         |
| 1     | 4        | 0.07                | 0.006                         | 0.006                         | <0.07               | 0.000                         | 0.006                         |
| 1     | 5        | 0.12                | 0.010                         | 0.010                         | <0.07               | 0.000                         | 0.006                         |
| 1     | 6        | 0.10                | 0.008                         | 0.008                         | <0.07               | 0.000                         | 0.006                         |
| 1     | 7        | 0.16                | 0.013                         | 0.013                         | <0.07               | 0.000                         | 0.006                         |
| 1     | 8        | 0.15                | 0.012                         | 0.012                         | <0.07               | 0.000                         | 0.006                         |
| 2     | 1        | <0.04               | 0.0                           | 0.003                         | <0.07               | 0.000                         | 0.006                         |
| 2     | 2        | <0.04               | 0.0                           | 0.003                         | <0.07               | 0.000                         | 0.006                         |
| 2     | 3        | <0.04               | 0.0                           | 0.003                         | <0.07               | 0.000                         | 0.006                         |
| 2     | 4        | <0.04               | 0.0                           | 0.003                         | <0.07               | 0.000                         | 0.006                         |
| 2     | 5        | <0.04               | 0.0                           | 0.003                         | <0.07               | 0.000                         | 0.006                         |
| 2     | 6        | <0.04               | 0.0                           | 0.003                         | <0.07               | 0.000                         | 0.006                         |
| 2     | 7        | <0.04               | 0.0                           | 0.003                         | <0.07               | 0.000                         | 0.006                         |
| 2     | 8        | <0.04               | 0.0                           | 0.003                         | <0.07               | 0.000                         | 0.006                         |
| 3     | 1        | <0.04               | 0.0                           | 0.003                         | 0.14                | 0.011                         | 0.011                         |
| 3     | 2        | <0.04               | 0.0                           | 0.003                         | 0.10                | 0.008                         | 0.008                         |
| 3     | 3        | <0.04               | 0.0                           | 0.003                         | <0.07               | 0.000                         | 0.006                         |
| 3     | 4        | <0.04               | 0.0                           | 0.003                         | 0.08                | 0.006                         | 0.006                         |
| 3     | 5        | <0.04               | 0.0                           | 0.003                         | 0.11                | 0.009                         | 0.009                         |
| 3     | 6        | <0.04               | 0.0                           | 0.003                         | <0.07               | 0.000                         | 0.006                         |
| 3     | 7        | <0.04               | 0.0                           | 0.003                         | 0.08                | 0.007                         | 0.007                         |
| 3     | 8        | <0.04               | 0.0                           | 0.003                         | 0.08                | 0.006                         | 0.006                         |
| 4     | 1        | <0.04               | 0.0                           | 0.003                         | <0.07               | 0.000                         | 0.006                         |
| 4     | 2        | 0.050               | 0.004                         | 0.004                         | <0.07               | 0.000                         | 0.006                         |
| 4     | 3        | 0.053               | 0.004                         | 0.004                         | <0.07               | 0.000                         | 0.006                         |
| 4     | 4        | 0.068               | 0.005                         | 0.005                         | <0.07               | 0.000                         | 0.006                         |
| 4     | 5        | 0.112               | 0.009                         | 0.009                         | <0.07               | 0.000                         | 0.006                         |
| 4     | 6        | 0.087               | 0.007                         | 0.007                         | <0.07               | 0.000                         | 0.006                         |
| 4     | 7        | 0.106               | 0.008                         | 0.008                         | <0.07               | 0.000                         | 0.006                         |
| 4     | 8        | 0.106               | 0.008                         | 0.008                         | <0.07               | 0.000                         | 0.006                         |
| 5     | 1        | <0.04               | 0.0                           | 0.003                         | <0.07               | 0.000                         | 0.006                         |
| 5     | 2        | <0.04               | 0.0                           | 0.003                         | <0.07               | 0.000                         | 0.006                         |
| 5     | 3        | <0.04               | 0.0                           | 0.003                         | <0.07               | 0.000                         | 0.006                         |
| 5     | 4        | <0.04               | 0.0                           | 0.003                         | <0.07               | 0.000                         | 0.006                         |
| 5     | 5        | <0.04               | 0.0                           | 0.003                         | <0.07               | 0.000                         | 0.006                         |
| 5     | 6        | <0.04               | 0.0                           | 0.003                         | <0.07               | 0.000                         | 0.006                         |
| 5     | 7        | <0.04               | 0.0                           | 0.003                         | <0.07               | 0.000                         | 0.006                         |
| 5     | 8        | <0.04               | 0.0                           | 0.003                         | <0.07               | 0.000                         | 0.006                         |
|       |          |                     | Σ min                         | Σ max                         |                     | Σ min                         | Σ max                         |
| 1     |          |                     | 0.060                         | 0.060                         |                     | 0.000                         | 0.045                         |
| 2     |          |                     | 0.000                         | 0.026                         |                     | 0.000                         | 0.045                         |
| 3     |          |                     | 0.000                         | 0.026                         |                     | 0.047                         | 0.058                         |
| 4     |          |                     | 0.047                         | 0.050                         |                     | 0.000                         | 0.045                         |
| 5     |          |                     | 0.000                         | 0.026                         |                     | 0.000                         | 0.045                         |
| Mean  |          |                     | 0.021                         | 0.037                         |                     | 0.009                         | 0.047                         |
| SD    |          |                     | 0.030                         | 0.016                         |                     | 0.021                         | 0.006                         |

**Table D.** Continued Greywacke.

| Stone | Fraction | LAB 1<br>Sn<br>µg/l | min<br>r<br>mg/m <sup>2</sup> | max<br>r<br>mg/m <sup>2</sup> | LAB 2<br>Sn<br>µg/l | min<br>r<br>mg/m <sup>2</sup> | max<br>r<br>mg/m <sup>2</sup> |
|-------|----------|---------------------|-------------------------------|-------------------------------|---------------------|-------------------------------|-------------------------------|
| 1     | 1        | 0.14                | 0.011                         | 0.011                         | <0.01               | 0.000                         | 0.001                         |
| 1     | 2        | 0.07                | 0.005                         | 0.005                         | <0.01               | 0.000                         | 0.001                         |
| 1     | 3        | 0.04                | 0.003                         | 0.003                         | <0.01               | 0.000                         | 0.001                         |
| 1     | 4        | 0.05                | 0.004                         | 0.004                         | <0.01               | 0.000                         | 0.001                         |
| 1     | 5        | 0.10                | 0.008                         | 0.008                         | <0.01               | 0.000                         | 0.001                         |
| 1     | 6        | 0.12                | 0.009                         | 0.009                         | <0.01               | 0.000                         | 0.001                         |
| 1     | 7        | 0.07                | 0.006                         | 0.006                         | <0.01               | 0.000                         | 0.001                         |
| 1     | 8        | 0.03                | 0.002                         | 0.002                         | <0.01               | 0.000                         | 0.001                         |
| 2     | 1        | 0.10                | 0.008                         | 0.008                         | <0.01               | 0.000                         | 0.001                         |
| 2     | 2        | 0.05                | 0.004                         | 0.004                         | <0.01               | 0.000                         | 0.001                         |
| 2     | 3        | 0.10                | 0.008                         | 0.008                         | <0.01               | 0.000                         | 0.001                         |
| 2     | 4        | 0.07                | 0.006                         | 0.006                         | <0.01               | 0.000                         | 0.001                         |
| 2     | 5        | 0.07                | 0.006                         | 0.006                         | <0.01               | 0.000                         | 0.001                         |
| 2     | 6        | 0.06                | 0.005                         | 0.005                         | <0.01               | 0.000                         | 0.001                         |
| 2     | 7        | <0.03               | 0.0                           | 0.002                         | <0.01               | 0.000                         | 0.001                         |
| 2     | 8        | <0.03               | 0.0                           | 0.002                         | <0.01               | 0.000                         | 0.001                         |
| 3     | 1        | 2.20                | 0.176                         | 0.176                         | <0.01               | 0.000                         | 0.001                         |
| 3     | 2        | 0.35                | 0.028                         | 0.028                         | <0.01               | 0.000                         | 0.001                         |
| 3     | 3        | 0.15                | 0.012                         | 0.012                         | <0.01               | 0.000                         | 0.001                         |
| 3     | 4        | 0.20                | 0.016                         | 0.016                         | <0.01               | 0.000                         | 0.001                         |
| 3     | 5        | 0.29                | 0.023                         | 0.023                         | <0.01               | 0.000                         | 0.001                         |
| 3     | 6        | 0.28                | 0.022                         | 0.022                         | <0.01               | 0.000                         | 0.001                         |
| 3     | 7        | 0.22                | 0.017                         | 0.017                         | <0.01               | 0.000                         | 0.001                         |
| 3     | 8        | 0.06                | 0.005                         | 0.005                         | 0.01                | 0.001                         | 0.001                         |
| 4     | 1        | 0.11                | 0.009                         | 0.009                         | <0.01               | 0.000                         | 0.001                         |
| 4     | 2        | 0.08                | 0.007                         | 0.007                         | <0.01               | 0.000                         | 0.001                         |
| 4     | 3        | 0.08                | 0.007                         | 0.007                         | <0.01               | 0.000                         | 0.001                         |
| 4     | 4        | 0.08                | 0.007                         | 0.007                         | <0.01               | 0.000                         | 0.001                         |
| 4     | 5        | 0.16                | 0.013                         | 0.013                         | <0.01               | 0.000                         | 0.001                         |
| 4     | 6        | 0.15                | 0.012                         | 0.012                         | <0.01               | 0.000                         | 0.001                         |
| 4     | 7        | 0.10                | 0.008                         | 0.008                         | <0.01               | 0.000                         | 0.001                         |
| 4     | 8        | 0.04                | 0.003                         | 0.003                         | <0.01               | 0.000                         | 0.001                         |
| 5     | 1        | 0.33                | 0.027                         | 0.027                         | <0.01               | 0.000                         | 0.001                         |
| 5     | 2        | 0.36                | 0.029                         | 0.029                         | <0.01               | 0.000                         | 0.001                         |
| 5     | 3        | 0.13                | 0.010                         | 0.010                         | <0.01               | 0.000                         | 0.001                         |
| 5     | 4        | 0.25                | 0.020                         | 0.020                         | <0.01               | 0.000                         | 0.001                         |
| 5     | 5        | 0.31                | 0.025                         | 0.025                         | <0.01               | 0.000                         | 0.001                         |
| 5     | 6        | 0.33                | 0.027                         | 0.027                         | <0.01               | 0.000                         | 0.001                         |
| 5     | 7        | 0.20                | 0.016                         | 0.016                         | <0.01               | 0.000                         | 0.001                         |
| 5     | 8        | 0.06                | 0.005                         | 0.005                         | <0.01               | 0.000                         | 0.001                         |
|       |          |                     | Σ min                         | Σ max                         |                     | Σ min                         | Σ max                         |
| 1     |          |                     | 0.049                         | 0.049                         |                     | 0.000                         | 0.006                         |
| 2     |          |                     | 0.036                         | 0.041                         |                     | 0.000                         | 0.006                         |
| 3     |          |                     | 0.300                         | 0.300                         |                     | 0.001                         | 0.006                         |
| 4     |          |                     | 0.065                         | 0.065                         |                     | 0.000                         | 0.006                         |
| 5     |          |                     | 0.159                         | 0.159                         |                     | 0.000                         | 0.006                         |
| Mean  |          |                     | 0.122                         | 0.123                         |                     | 0.000                         | 0.006                         |
| SD    |          |                     | 0.111                         | 0.110                         |                     | 0.000                         | 0.000                         |

**Table D.** Continued Greywacke.

| Stone | Fraction | LAB 1<br>Sr<br>µg/l | min<br>r<br>mg/m <sup>2</sup> | max<br>r<br>mg/m <sup>2</sup> | LAB 2<br>Sr<br>µg/l | min<br>r<br>mg/m <sup>2</sup> | max<br>r<br>mg/m <sup>2</sup> |
|-------|----------|---------------------|-------------------------------|-------------------------------|---------------------|-------------------------------|-------------------------------|
| 1     | 1        | 9.46                | 0.76                          | 0.76                          | 0.77                | 0.06                          | 0.06                          |
| 1     | 2        | 8.74                | 0.70                          | 0.70                          | <0.5                | 0.00                          | 0.04                          |
| 1     | 3        | 8.66                | 0.69                          | 0.69                          | <0.5                | 0.00                          | 0.04                          |
| 1     | 4        | 9.11                | 0.73                          | 0.73                          | <0.5                | 0.00                          | 0.04                          |
| 1     | 5        | 9.56                | 0.77                          | 0.77                          | <0.5                | 0.00                          | 0.04                          |
| 1     | 6        | 8.66                | 0.69                          | 0.69                          | 0.69                | 0.06                          | 0.06                          |
| 1     | 7        | 9.81                | 0.78                          | 0.78                          | 1.15                | 0.09                          | 0.09                          |
| 1     | 8        | 5.54                | 0.44                          | 0.44                          | 1.08                | 0.09                          | 0.09                          |
| 2     | 1        | 9.18                | 0.73                          | 0.73                          | 1.23                | 0.10                          | 0.10                          |
| 2     | 2        | 8.40                | 0.67                          | 0.67                          | <0.5                | 0.00                          | 0.04                          |
| 2     | 3        | 7.11                | 0.57                          | 0.57                          | <0.5                | 0.00                          | 0.04                          |
| 2     | 4        | 7.98                | 0.64                          | 0.64                          | 0.62                | 0.05                          | 0.05                          |
| 2     | 5        | 8.01                | 0.64                          | 0.64                          | 1.30                | 0.10                          | 0.10                          |
| 2     | 6        | 7.58                | 0.61                          | 0.61                          | 1.46                | 0.12                          | 0.12                          |
| 2     | 7        | 8.41                | 0.67                          | 0.67                          | 3.06                | 0.24                          | 0.24                          |
| 2     | 8        | 11.14               | 0.89                          | 0.89                          | 3.21                | 0.26                          | 0.26                          |
| 3     | 1        | 9.92                | 0.79                          | 0.79                          | 0.54                | 0.04                          | 0.04                          |
| 3     | 2        | 9.15                | 0.73                          | 0.73                          | <0.5                | 0.00                          | 0.04                          |
| 3     | 3        | 1.67                | 0.13                          | 0.13                          | <0.5                | 0.00                          | 0.04                          |
| 3     | 4        | 8.77                | 0.70                          | 0.70                          | 0.54                | 0.04                          | 0.04                          |
| 3     | 5        | 11.01               | 0.88                          | 0.88                          | <0.5                | 0.00                          | 0.04                          |
| 3     | 6        | 11.97               | 0.96                          | 0.96                          | <0.5                | 0.00                          | 0.04                          |
| 3     | 7        | 14.48               | 1.16                          | 1.16                          | <0.5                | 0.00                          | 0.04                          |
| 3     | 8        | 19.88               | 1.59                          | 1.59                          | <0.5                | 0.00                          | 0.04                          |
| 4     | 1        | 9.24                | 0.74                          | 0.74                          | <0.5                | 0.00                          | 0.04                          |
| 4     | 2        | 9.01                | 0.72                          | 0.72                          | <0.5                | 0.00                          | 0.04                          |
| 4     | 3        | 8.19                | 0.65                          | 0.65                          | <0.5                | 0.00                          | 0.04                          |
| 4     | 4        | 8.74                | 0.70                          | 0.70                          | <0.5                | 0.00                          | 0.04                          |
| 4     | 5        | 9.91                | 0.79                          | 0.79                          | 0.54                | 0.04                          | 0.04                          |
| 4     | 6        | 11.95               | 0.96                          | 0.96                          | 1.07                | 0.09                          | 0.09                          |
| 4     | 7        | 13.70               | 1.10                          | 1.10                          | 1.99                | 0.16                          | 0.16                          |
| 4     | 8        | 11.52               | 0.92                          | 0.92                          | 1.76                | 0.14                          | 0.14                          |
| 5     | 1        | 10.57               | 0.85                          | 0.85                          | 1.29                | 0.10                          | 0.10                          |
| 5     | 2        | 9.62                | 0.77                          | 0.77                          | 0.68                | 0.05                          | 0.05                          |
| 5     | 3        | 2.51                | 0.20                          | 0.20                          | 0.68                | 0.05                          | 0.05                          |
| 5     | 4        | 9.15                | 0.73                          | 0.73                          | 0.76                | 0.06                          | 0.06                          |
| 5     | 5        | 11.64               | 0.93                          | 0.93                          | 1.67                | 0.13                          | 0.13                          |
| 5     | 6        | 8.64                | 0.69                          | 0.69                          | 2.21                | 0.18                          | 0.18                          |
| 5     | 7        | 17.25               | 1.38                          | 1.38                          | 3.65                | 0.29                          | 0.29                          |
| 5     | 8        | 19.59               | 1.57                          | 1.57                          | 3.88                | 0.31                          | 0.31                          |
|       |          |                     | Σ min                         | Σ max                         |                     | Σ min                         | Σ max                         |
| 1     |          |                     | 5.56                          | 5.56                          |                     | 0.30                          | 0.46                          |
| 2     |          |                     | 5.43                          | 5.43                          |                     | 0.87                          | 0.95                          |
| 3     |          |                     | 6.95                          | 6.95                          |                     | 0.09                          | 0.33                          |
| 4     |          |                     | 6.58                          | 6.58                          |                     | 0.43                          | 0.59                          |
| 5     |          |                     | 7.12                          | 7.12                          |                     | 1.19                          | 1.19                          |
| Mean  |          |                     | 6.33                          | 6.33                          |                     | 0.57                          | 0.70                          |
| SD    |          |                     | 0.79                          | 0.79                          |                     | 0.45                          | 0.36                          |

**Table D.** Continued Greywacke.

| Stone | Fraction | LAB 1<br>U<br>µg/l | min<br>r<br>mg/m <sup>2</sup> | max<br>r<br>mg/m <sup>2</sup> | LAB 2<br>U<br>µg/l | min<br>r<br>mg/m <sup>2</sup> | max<br>r<br>mg/m <sup>2</sup> |
|-------|----------|--------------------|-------------------------------|-------------------------------|--------------------|-------------------------------|-------------------------------|
| 1     | 1        | <0.04              | 0.0                           | 0.003                         | 0.010              | 0.001                         | 0.001                         |
| 1     | 2        | <0.04              | 0.0                           | 0.003                         | 0.009              | 0.001                         | 0.001                         |
| 1     | 3        | <0.04              | 0.0                           | 0.003                         | 0.008              | 0.001                         | 0.001                         |
| 1     | 4        | <0.04              | 0.0                           | 0.003                         | 0.007              | 0.001                         | 0.001                         |
| 1     | 5        | 0.042              | 0.003                         | 0.003                         | 0.009              | 0.001                         | 0.001                         |
| 1     | 6        | 0.041              | 0.003                         | 0.003                         | 0.009              | 0.001                         | 0.001                         |
| 1     | 7        | 0.037              | 0.003                         | 0.003                         | 0.012              | 0.001                         | 0.001                         |
| 1     | 8        | 0.035              | 0.003                         | 0.003                         | 0.012              | 0.001                         | 0.001                         |
| 2     | 1        | <0.04              | 0.0                           | 0.003                         | 0.012              | 0.001                         | 0.001                         |
| 2     | 2        | <0.04              | 0.0                           | 0.003                         | 0.007              | 0.001                         | 0.001                         |
| 2     | 3        | <0.04              | 0.0                           | 0.003                         | 0.006              | 0.000                         | 0.000                         |
| 2     | 4        | <0.04              | 0.0                           | 0.003                         | 0.006              | 0.000                         | 0.000                         |
| 2     | 5        | <0.04              | 0.0                           | 0.003                         | 0.010              | 0.001                         | 0.001                         |
| 2     | 6        | <0.04              | 0.0                           | 0.003                         | 0.010              | 0.001                         | 0.001                         |
| 2     | 7        | <0.04              | 0.0                           | 0.003                         | 0.013              | 0.001                         | 0.001                         |
| 2     | 8        | <0.04              | 0.0                           | 0.003                         | 0.011              | 0.001                         | 0.001                         |
| 3     | 1        | <0.04              | 0.0                           | 0.003                         | 0.008              | 0.001                         | 0.001                         |
| 3     | 2        | <0.04              | 0.0                           | 0.003                         | 0.010              | 0.001                         | 0.001                         |
| 3     | 3        | <0.04              | 0.0                           | 0.003                         | 0.017              | 0.001                         | 0.001                         |
| 3     | 4        | <0.04              | 0.0                           | 0.003                         | 0.024              | 0.002                         | 0.002                         |
| 3     | 5        | 0.064              | 0.005                         | 0.005                         | 0.045              | 0.004                         | 0.004                         |
| 3     | 6        | 0.072              | 0.006                         | 0.006                         | 0.046              | 0.004                         | 0.004                         |
| 3     | 7        | 0.131              | 0.010                         | 0.010                         | 0.057              | 0.005                         | 0.005                         |
| 3     | 8        | 0.185              | 0.015                         | 0.015                         | 0.046              | 0.004                         | 0.004                         |
| 4     | 1        | <0.04              | 0.0                           | 0.003                         | 0.011              | 0.001                         | 0.001                         |
| 4     | 2        | <0.04              | 0.0                           | 0.003                         | 0.008              | 0.001                         | 0.001                         |
| 4     | 3        | <0.04              | 0.0                           | 0.003                         | 0.007              | 0.001                         | 0.001                         |
| 4     | 4        | <0.04              | 0.0                           | 0.003                         | 0.007              | 0.001                         | 0.001                         |
| 4     | 5        | <0.04              | 0.0                           | 0.003                         | 0.010              | 0.001                         | 0.001                         |
| 4     | 6        | <0.04              | 0.0                           | 0.003                         | 0.011              | 0.001                         | 0.001                         |
| 4     | 7        | <0.04              | 0.0                           | 0.003                         | 0.014              | 0.001                         | 0.001                         |
| 4     | 8        | <0.04              | 0.0                           | 0.003                         | 0.013              | 0.001                         | 0.001                         |
| 5     | 1        | 0.055              | 0.004                         | 0.004                         | 0.010              | 0.001                         | 0.001                         |
| 5     | 2        | <0.04              | 0.0                           | 0.003                         | 0.009              | 0.001                         | 0.001                         |
| 5     | 3        | 0.048              | 0.004                         | 0.004                         | 0.008              | 0.001                         | 0.001                         |
| 5     | 4        | 0.055              | 0.004                         | 0.004                         | 0.009              | 0.001                         | 0.001                         |
| 5     | 5        | 0.139              | 0.011                         | 0.011                         | 0.016              | 0.001                         | 0.001                         |
| 5     | 6        | 0.160              | 0.013                         | 0.013                         | 0.019              | 0.002                         | 0.002                         |
| 5     | 7        | 0.324              | 0.026                         | 0.026                         | 0.036              | 0.003                         | 0.003                         |
| 5     | 8        | 0.403              | 0.032                         | 0.032                         | 0.041              | 0.003                         | 0.003                         |
|       |          |                    | Σ min                         | Σ max                         |                    | Σ min                         | Σ max                         |
| 1     |          |                    | 0.012                         | 0.025                         |                    | 0.006                         | 0.006                         |
| 2     |          |                    | 0.000                         | 0.026                         |                    | 0.006                         | 0.006                         |
| 3     |          |                    | 0.036                         | 0.049                         |                    | 0.020                         | 0.020                         |
| 4     |          |                    | 0.000                         | 0.026                         |                    | 0.006                         | 0.006                         |
| 5     |          |                    | 0.095                         | 0.098                         |                    | 0.012                         | 0.012                         |
| Mean  |          |                    | 0.029                         | 0.045                         |                    | 0.010                         | 0.010                         |
| SD    |          |                    | 0.040                         | 0.031                         |                    | 0.006                         | 0.006                         |

**Table D.** Continued Greywacke.

| Stone | Fraction | LAB 1<br>V<br>µg/l | min<br>r<br>mg/m <sup>2</sup> | max<br>r<br>mg/m <sup>2</sup> | LAB 2<br>V<br>µg/l | min<br>r<br>mg/m <sup>2</sup> | max<br>r<br>mg/m <sup>2</sup> |
|-------|----------|--------------------|-------------------------------|-------------------------------|--------------------|-------------------------------|-------------------------------|
| 1     | 1        | 0.029              | 0.002                         | 0.002                         | 0.010              | 0.001                         | 0.001                         |
| 1     | 2        | 0.022              | 0.002                         | 0.002                         | 0.017              | 0.001                         | 0.001                         |
| 1     | 3        | <0.02              | 0.000                         | 0.002                         | <0.01              | 0.000                         | 0.001                         |
| 1     | 4        | <0.02              | 0.000                         | 0.002                         | 0.027              | 0.002                         | 0.002                         |
| 1     | 5        | <0.02              | 0.000                         | 0.002                         | <0.01              | 0.000                         | 0.001                         |
| 1     | 6        | <0.02              | 0.000                         | 0.002                         | <0.01              | 0.000                         | 0.001                         |
| 1     | 7        | 0.029              | 0.002                         | 0.002                         | <0.01              | 0.000                         | 0.001                         |
| 1     | 8        | <0.02              | 0.000                         | 0.002                         | <0.01              | 0.000                         | 0.001                         |
| 2     | 1        | 0.055              | 0.004                         | 0.004                         | 0.038              | 0.003                         | 0.003                         |
| 2     | 2        | 0.030              | 0.002                         | 0.002                         | 0.015              | 0.001                         | 0.001                         |
| 2     | 3        | 0.024              | 0.002                         | 0.002                         | <0.01              | 0.000                         | 0.001                         |
| 2     | 4        | <0.02              | 0.000                         | 0.002                         | <0.01              | 0.000                         | 0.001                         |
| 2     | 5        | <0.02              | 0.000                         | 0.002                         | <0.01              | 0.000                         | 0.001                         |
| 2     | 6        | <0.02              | 0.000                         | 0.002                         | <0.01              | 0.000                         | 0.001                         |
| 2     | 7        | 0.026              | 0.002                         | 0.002                         | <0.01              | 0.000                         | 0.001                         |
| 2     | 8        | 0.035              | 0.003                         | 0.003                         | <0.01              | 0.000                         | 0.001                         |
| 3     | 1        | 0.041              | 0.003                         | 0.003                         | 0.027              | 0.002                         | 0.002                         |
| 3     | 2        | 0.100              | 0.008                         | 0.008                         | 0.013              | 0.001                         | 0.001                         |
| 3     | 3        | 0.030              | 0.002                         | 0.002                         | 0.010              | 0.001                         | 0.001                         |
| 3     | 4        | 0.035              | 0.003                         | 0.003                         | 0.054              | 0.004                         | 0.004                         |
| 3     | 5        | 0.044              | 0.004                         | 0.004                         | 0.013              | 0.001                         | 0.001                         |
| 3     | 6        | 0.031              | 0.003                         | 0.003                         | 0.013              | 0.001                         | 0.001                         |
| 3     | 7        | 0.050              | 0.004                         | 0.004                         | <0.01              | 0.000                         | 0.001                         |
| 3     | 8        | 0.032              | 0.003                         | 0.003                         | 0.011              | 0.001                         | 0.001                         |
| 4     | 1        | 0.022              | 0.002                         | 0.002                         | 0.018              | 0.001                         | 0.001                         |
| 4     | 2        | <0.02              | 0.000                         | 0.002                         | 0.013              | 0.001                         | 0.001                         |
| 4     | 3        | <0.02              | 0.000                         | 0.002                         | 0.010              | 0.001                         | 0.001                         |
| 4     | 4        | <0.02              | 0.000                         | 0.002                         | 0.058              | 0.005                         | 0.005                         |
| 4     | 5        | <0.02              | 0.000                         | 0.002                         | 0.011              | 0.001                         | 0.001                         |
| 4     | 6        | <0.02              | 0.000                         | 0.002                         | <0.01              | 0.000                         | 0.001                         |
| 4     | 7        | 0.022              | 0.002                         | 0.002                         | <0.01              | 0.000                         | 0.001                         |
| 4     | 8        | <0.02              | 0.000                         | 0.002                         | <0.01              | 0.000                         | 0.001                         |
| 5     | 1        | 0.049              | 0.004                         | 0.004                         | 0.019              | 0.002                         | 0.002                         |
| 5     | 2        | 0.046              | 0.004                         | 0.004                         | <0.01              | 0.000                         | 0.001                         |
| 5     | 3        | 0.030              | 0.002                         | 0.002                         | <0.01              | 0.000                         | 0.001                         |
| 5     | 4        | 0.029              | 0.002                         | 0.002                         | 0.075              | 0.006                         | 0.006                         |
| 5     | 5        | 0.039              | 0.003                         | 0.003                         | 0.011              | 0.001                         | 0.001                         |
| 5     | 6        | 0.024              | 0.002                         | 0.002                         | <0.01              | 0.000                         | 0.001                         |
| 5     | 7        | 0.156              | 0.012                         | 0.012                         | <0.01              | 0.000                         | 0.001                         |
| 5     | 8        | <0.02              | 0.000                         | 0.002                         | <0.01              | 0.000                         | 0.001                         |
|       |          |                    | Σ min                         | Σ max                         |                    | Σ min                         | Σ max                         |
| 1     |          |                    | 0.006                         | 0.014                         |                    | 0.004                         | 0.008                         |
| 2     |          |                    | 0.013                         | 0.018                         |                    | 0.004                         | 0.009                         |
| 3     |          |                    | 0.029                         | 0.029                         |                    | 0.011                         | 0.012                         |
| 4     |          |                    | 0.004                         | 0.013                         |                    | 0.009                         | 0.011                         |
| 5     |          |                    | 0.030                         | 0.031                         |                    | 0.008                         | 0.012                         |
| Mean  |          |                    | 0.016                         | 0.021                         |                    | 0.007                         | 0.011                         |
| SD    |          |                    | 0.012                         | 0.008                         |                    | 0.003                         | 0.002                         |

**Table D.** Continued Greywacke.

| Stone | Fraction | LAB 1<br>Zn<br>µg/l | min<br>r<br>mg/m <sup>2</sup> | max<br>r<br>mg/m <sup>2</sup> | LAB 2<br>Zn<br>µg/l | min<br>r<br>mg/m <sup>2</sup> | max<br>r<br>mg/m <sup>2</sup> |
|-------|----------|---------------------|-------------------------------|-------------------------------|---------------------|-------------------------------|-------------------------------|
| 1     | 1        | 513                 | 41.04                         | 41.04                         | 0.93                | 0.07                          | 0.07                          |
| 1     | 2        | 483                 | 38.64                         | 38.64                         | 4.30                | 0.34                          | 0.34                          |
| 1     | 3        | 478                 | 38.28                         | 38.28                         | 1.61                | 0.13                          | 0.13                          |
| 1     | 4        | 498                 | 39.82                         | 39.82                         | 7.40                | 0.59                          | 0.59                          |
| 1     | 5        | 470                 | 37.63                         | 37.63                         | 1.70                | 0.14                          | 0.14                          |
| 1     | 6        | 459                 | 36.69                         | 36.69                         | 2.15                | 0.17                          | 0.17                          |
| 1     | 7        | 469                 | 37.54                         | 37.54                         | 1.76                | 0.14                          | 0.14                          |
| 1     | 8        | 268                 | 21.43                         | 21.43                         | 1.99                | 0.16                          | 0.16                          |
| 2     | 1        | 468                 | 37.45                         | 37.45                         | 0.33                | 0.03                          | 0.03                          |
| 2     | 2        | 480                 | 38.40                         | 38.40                         | 0.87                | 0.07                          | 0.07                          |
| 2     | 3        | 427                 | 34.15                         | 34.15                         | 0.58                | 0.05                          | 0.05                          |
| 2     | 4        | 285                 | 22.79                         | 22.79                         | 0.70                | 0.06                          | 0.06                          |
| 2     | 5        | 408                 | 32.62                         | 32.62                         | 1.39                | 0.11                          | 0.11                          |
| 2     | 6        | 247                 | 19.72                         | 19.72                         | 1.13                | 0.09                          | 0.09                          |
| 2     | 7        | 443                 | 35.45                         | 35.45                         | 1.66                | 0.13                          | 0.13                          |
| 2     | 8        | 623                 | 49.80                         | 49.80                         | 0.98                | 0.08                          | 0.08                          |
| 3     | 1        | 392                 | 31.36                         | 31.36                         | 0.14                | 0.01                          | 0.01                          |
| 3     | 2        | 160                 | 12.79                         | 12.79                         | 0.39                | 0.03                          | 0.03                          |
| 3     | 3        | 45                  | 3.60                          | 3.60                          | 0.43                | 0.03                          | 0.03                          |
| 3     | 4        | 314                 | 25.14                         | 25.14                         | 4.78                | 0.38                          | 0.38                          |
| 3     | 5        | 324                 | 25.93                         | 25.93                         | 0.33                | 0.03                          | 0.03                          |
| 3     | 6        | 492                 | 39.35                         | 39.35                         | 0.25                | 0.02                          | 0.02                          |
| 3     | 7        | 461                 | 36.90                         | 36.90                         | 0.35                | 0.03                          | 0.03                          |
| 3     | 8        | 704                 | 56.30                         | 56.30                         | 0.42                | 0.03                          | 0.03                          |
| 4     | 1        | 328                 | 26.21                         | 26.21                         | 0.37                | 0.03                          | 0.03                          |
| 4     | 2        | 491                 | 39.31                         | 39.31                         | 0.62                | 0.05                          | 0.05                          |
| 4     | 3        | 270                 | 21.57                         | 21.57                         | 0.68                | 0.05                          | 0.05                          |
| 4     | 4        | 448                 | 35.83                         | 35.83                         | 7.64                | 0.61                          | 0.61                          |
| 4     | 5        | 313                 | 25.01                         | 25.01                         | 0.46                | 0.04                          | 0.04                          |
| 4     | 6        | 556                 | 44.49                         | 44.49                         | 1.53                | 0.12                          | 0.12                          |
| 4     | 7        | 530                 | 42.37                         | 42.37                         | 0.67                | 0.05                          | 0.05                          |
| 4     | 8        | 321                 | 25.71                         | 25.71                         | 0.76                | 0.06                          | 0.06                          |
| 5     | 1        | 458                 | 36.65                         | 36.65                         | 0.11                | 0.01                          | 0.01                          |
| 5     | 2        | 271                 | 21.69                         | 21.69                         | 1.90                | 0.15                          | 0.15                          |
| 5     | 3        | 28                  | 2.26                          | 2.26                          | 0.17                | 0.01                          | 0.01                          |
| 5     | 4        | 283                 | 22.60                         | 22.60                         | 6.83                | 0.55                          | 0.55                          |
| 5     | 5        | 430                 | 34.43                         | 34.43                         | 0.40                | 0.03                          | 0.03                          |
| 5     | 6        | 320                 | 25.61                         | 25.61                         | 0.38                | 0.03                          | 0.03                          |
| 5     | 7        | 472                 | 37.72                         | 37.72                         | 0.33                | 0.03                          | 0.03                          |
| 5     | 8        | 363                 | 29.05                         | 29.05                         | 0.42                | 0.03                          | 0.03                          |
|       |          |                     | Σ min                         | Σ max                         |                     | Σ min                         | Σ max                         |
| 1     |          |                     | 291                           | 291                           |                     | 1.75                          | 1.75                          |
| 2     |          |                     | 270                           | 270                           |                     | 0.61                          | 0.61                          |
| 3     |          |                     | 231                           | 231                           |                     | 0.57                          | 0.57                          |
| 4     |          |                     | 261                           | 261                           |                     | 1.02                          | 1.02                          |
| 5     |          |                     | 210                           | 210                           |                     | 0.84                          | 0.84                          |
| Mean  |          |                     | 253                           | 253                           |                     | 0.96                          | 0.96                          |
| SD    |          |                     | 32                            | 32                            |                     | 0.48                          | 0.48                          |

**Table E.** DSLT results Granodiorite (LAB 1 DSLT contract laboratory, LAB 2 DSLT BfG).

| Stone | Fraction | LAB 1<br>Al<br>µg/l | min<br>r<br>mg/m <sup>2</sup> | max<br>r<br>mg/m <sup>2</sup> | LAB 2<br>Al<br>µg/l | min<br>r<br>mg/m <sup>2</sup> | max<br>r<br>mg/m <sup>2</sup> |
|-------|----------|---------------------|-------------------------------|-------------------------------|---------------------|-------------------------------|-------------------------------|
| 1     | 1        | <40.8               | 0.0                           | 3.26                          | <40.8               | 0.0                           | 3.27                          |
| 1     | 2        | <40.8               | 0.0                           | 3.26                          | <40.8               | 0.0                           | 3.27                          |
| 1     | 3        | <40.8               | 0.0                           | 3.26                          | <40.8               | 0.0                           | 3.27                          |
| 1     | 4        | <40.8               | 0.0                           | 3.26                          | <40.8               | 0.0                           | 3.27                          |
| 1     | 5        | <40.8               | 0.0                           | 3.26                          | <40.8               | 0.0                           | 3.27                          |
| 1     | 6        | <40.8               | 0.0                           | 3.26                          | <40.8               | 0.0                           | 3.27                          |
| 1     | 7        | <40.8               | 0.0                           | 3.26                          | <40.8               | 0.0                           | 3.27                          |
| 1     | 8        | <40.8               | 0.0                           | 3.26                          | <40.8               | 0.0                           | 3.27                          |
| 2     | 1        | <40.8               | 0.0                           | 3.26                          | <40.8               | 0.0                           | 3.26                          |
| 2     | 2        | <40.8               | 0.0                           | 3.26                          | <40.8               | 0.0                           | 3.26                          |
| 2     | 3        | <40.8               | 0.0                           | 3.26                          | <40.8               | 0.0                           | 3.26                          |
| 2     | 4        | <40.8               | 0.0                           | 3.26                          | <40.8               | 0.0                           | 3.26                          |
| 2     | 5        | <40.8               | 0.0                           | 3.26                          | <40.8               | 0.0                           | 3.26                          |
| 2     | 6        | <40.8               | 0.0                           | 3.26                          | <40.8               | 0.0                           | 3.26                          |
| 2     | 7        | <40.8               | 0.0                           | 3.26                          | <40.8               | 0.0                           | 3.26                          |
| 2     | 8        | <40.8               | 0.0                           | 3.26                          | <40.8               | 0.0                           | 3.26                          |
| 3     | 1        | <40.8               | 0.0                           | 3.26                          | <40.8               | 0.0                           | 3.27                          |
| 3     | 2        | <40.8               | 0.0                           | 3.26                          | <40.8               | 0.0                           | 3.27                          |
| 3     | 3        | <40.8               | 0.0                           | 3.26                          | <40.8               | 0.0                           | 3.27                          |
| 3     | 4        | <40.8               | 0.0                           | 3.26                          | <40.8               | 0.0                           | 3.27                          |
| 3     | 5        | <40.8               | 0.0                           | 3.26                          | <40.8               | 0.0                           | 3.27                          |
| 3     | 6        | <40.8               | 0.0                           | 3.26                          | <40.8               | 0.0                           | 3.27                          |
| 3     | 7        | <40.8               | 0.0                           | 3.26                          | <40.8               | 0.0                           | 3.27                          |
| 3     | 8        | <40.8               | 0.0                           | 3.26                          | <40.8               | 0.0                           | 3.27                          |
| 4     | 1        | <40.8               | 0.0                           | 3.26                          | <40.8               | 0.0                           | 3.26                          |
| 4     | 2        | <40.8               | 0.0                           | 3.26                          | <40.8               | 0.0                           | 3.26                          |
| 4     | 3        | <40.8               | 0.0                           | 3.26                          | <40.8               | 0.0                           | 3.26                          |
| 4     | 4        | <40.8               | 0.0                           | 3.26                          | <40.8               | 0.0                           | 3.26                          |
| 4     | 5        | <40.8               | 0.0                           | 3.26                          | <40.8               | 0.0                           | 3.26                          |
| 4     | 6        | <40.8               | 0.0                           | 3.26                          | <40.8               | 0.0                           | 3.26                          |
| 4     | 7        | <40.8               | 0.0                           | 3.26                          | <40.8               | 0.0                           | 3.26                          |
| 4     | 8        | 335.6               | 26.8                          | 26.84                         | <40.8               | 0.0                           | 3.26                          |
| 5     | 1        | <40.8               | 0.0                           | 3.26                          | <40.8               | 0.0                           | 3.26                          |
| 5     | 2        | <40.8               | 0.0                           | 3.26                          | <40.8               | 0.0                           | 3.26                          |
| 5     | 3        | <40.8               | 0.0                           | 3.26                          | <40.8               | 0.0                           | 3.26                          |
| 5     | 4        | <40.8               | 0.0                           | 3.26                          | <40.8               | 0.0                           | 3.26                          |
| 5     | 5        | <40.8               | 0.0                           | 3.26                          | <40.8               | 0.0                           | 3.26                          |
| 5     | 6        | <40.8               | 0.0                           | 3.26                          | <40.8               | 0.0                           | 3.26                          |
| 5     | 7        | <40.8               | 0.0                           | 3.26                          | <40.8               | 0.0                           | 3.26                          |
| 5     | 8        | <40.8               | 0.0                           | 3.26                          | <40.8               | 0.0                           | 3.26                          |
|       |          |                     | Σ min                         | Σ max                         |                     | Σ min                         | Σ max                         |
| 1     |          |                     | 0.0                           | 26.12                         |                     | 0.00                          | 26.15                         |
| 2     |          |                     | 0.0                           | 26.12                         |                     | 0.00                          | 26.08                         |
| 3     |          |                     | 0.0                           | 26.11                         |                     | 0.00                          | 26.13                         |
| 4     |          |                     | 26.8                          | 49.69                         |                     | 0.00                          | 26.11                         |
| 5     |          |                     | 0.0                           | 26.12                         |                     | 0.00                          | 26.10                         |
| Mean  |          |                     | 5.4                           | 30.83                         |                     | 0.00                          | 26.11                         |
| SD    |          |                     | 12.0                          | 10.54                         |                     | 0.00                          | 0.03                          |

**Table E.** Continued Granodiorite.

| Stone | Fraction | LAB 1<br>As<br>µg/l | min<br>r<br>mg/m <sup>2</sup> | max<br>r<br>mg/m <sup>2</sup> | LAB 2<br>As<br>µg/l | min<br>r<br>mg/m <sup>2</sup> | max<br>r<br>mg/m <sup>2</sup> |
|-------|----------|---------------------|-------------------------------|-------------------------------|---------------------|-------------------------------|-------------------------------|
| 1     | 1        | 0.39                | 0.031                         | 0.031                         | <0.06               | 0.000                         | 0.005                         |
| 1     | 2        | 0.42                | 0.033                         | 0.033                         | <0.06               | 0.000                         | 0.005                         |
| 1     | 3        | 0.36                | 0.029                         | 0.029                         | <0.06               | 0.000                         | 0.005                         |
| 1     | 4        | 0.35                | 0.028                         | 0.028                         | 0.07                | 0.005                         | 0.005                         |
| 1     | 5        | 0.75                | 0.060                         | 0.060                         | 0.18                | 0.015                         | 0.015                         |
| 1     | 6        | 0.69                | 0.055                         | 0.055                         | 0.19                | 0.015                         | 0.015                         |
| 1     | 7        | 0.68                | 0.055                         | 0.055                         | 0.43                | 0.035                         | 0.035                         |
| 1     | 8        | 0.68                | 0.054                         | 0.054                         | 0.36                | 0.029                         | 0.029                         |
| 2     | 1        | 0.20                | 0.016                         | 0.016                         | <0.06               | 0.000                         | 0.005                         |
| 2     | 2        | 0.23                | 0.018                         | 0.018                         | 0.06                | 0.005                         | 0.005                         |
| 2     | 3        | 0.29                | 0.023                         | 0.023                         | 0.06                | 0.005                         | 0.005                         |
| 2     | 4        | 0.35                | 0.028                         | 0.028                         | 0.06                | 0.005                         | 0.005                         |
| 2     | 5        | 0.98                | 0.079                         | 0.079                         | 0.17                | 0.014                         | 0.014                         |
| 2     | 6        | 1.17                | 0.093                         | 0.093                         | 0.20                | 0.016                         | 0.016                         |
| 2     | 7        | 1.88                | 0.150                         | 0.150                         | 0.45                | 0.036                         | 0.036                         |
| 2     | 8        | 3.38                | 0.270                         | 0.270                         | 0.34                | 0.027                         | 0.027                         |
| 3     | 1        | 0.15                | 0.012                         | 0.012                         | <0.06               | 0.000                         | 0.005                         |
| 3     | 2        | 0.18                | 0.015                         | 0.015                         | 0.07                | 0.005                         | 0.005                         |
| 3     | 3        | 0.23                | 0.019                         | 0.019                         | 0.10                | 0.008                         | 0.008                         |
| 3     | 4        | 0.25                | 0.020                         | 0.020                         | 0.12                | 0.010                         | 0.010                         |
| 3     | 5        | 0.67                | 0.054                         | 0.054                         | 0.31                | 0.024                         | 0.024                         |
| 3     | 6        | 0.71                | 0.056                         | 0.056                         | 0.35                | 0.028                         | 0.028                         |
| 3     | 7        | 0.75                | 0.060                         | 0.060                         | 0.86                | 0.069                         | 0.069                         |
| 3     | 8        | 1.20                | 0.096                         | 0.096                         | 0.88                | 0.070                         | 0.070                         |
| 4     | 1        | 0.10                | 0.008                         | 0.008                         | 0.10                | 0.008                         | 0.008                         |
| 4     | 2        | 0.14                | 0.011                         | 0.011                         | 0.09                | 0.007                         | 0.007                         |
| 4     | 3        | 0.21                | 0.017                         | 0.017                         | 0.08                | 0.007                         | 0.007                         |
| 4     | 4        | 0.25                | 0.020                         | 0.020                         | 0.07                | 0.006                         | 0.006                         |
| 4     | 5        | 0.65                | 0.052                         | 0.052                         | 0.13                | 0.011                         | 0.011                         |
| 4     | 6        | 0.65                | 0.052                         | 0.052                         | 0.14                | 0.011                         | 0.011                         |
| 4     | 7        | 0.81                | 0.065                         | 0.065                         | 0.27                | 0.021                         | 0.021                         |
| 4     | 8        | 1.74                | 0.139                         | 0.139                         | 0.22                | 0.018                         | 0.018                         |
| 5     | 1        | 0.22                | 0.017                         | 0.017                         | 0.15                | 0.012                         | 0.012                         |
| 5     | 2        | 0.24                | 0.020                         | 0.020                         | 0.15                | 0.012                         | 0.012                         |
| 5     | 3        | 0.27                | 0.022                         | 0.022                         | 0.14                | 0.011                         | 0.011                         |
| 5     | 4        | 0.30                | 0.024                         | 0.024                         | 0.11                | 0.009                         | 0.009                         |
| 5     | 5        | 0.79                | 0.063                         | 0.063                         | 0.18                | 0.014                         | 0.014                         |
| 5     | 6        | 0.84                | 0.067                         | 0.067                         | 0.18                | 0.015                         | 0.015                         |
| 5     | 7        | 1.13                | 0.090                         | 0.090                         | 0.36                | 0.029                         | 0.029                         |
| 5     | 8        | 2.07                | 0.166                         | 0.166                         | 0.28                | 0.022                         | 0.022                         |
|       |          |                     | Σ min                         | Σ max                         |                     | Σ min                         | Σ max                         |
| 1     |          |                     | 0.345                         | 0.345                         |                     | 0.099                         | 0.114                         |
| 2     |          |                     | 0.678                         | 0.678                         |                     | 0.108                         | 0.113                         |
| 3     |          |                     | 0.332                         | 0.332                         |                     | 0.215                         | 0.220                         |
| 4     |          |                     | 0.363                         | 0.363                         |                     | 0.088                         | 0.088                         |
| 5     |          |                     | 0.469                         | 0.469                         |                     | 0.123                         | 0.123                         |
| Mean  |          |                     | 0.438                         | 0.438                         |                     | 0.127                         | 0.131                         |
| SD    |          |                     | 0.145                         | 0.145                         |                     | 0.051                         | 0.051                         |

**Table E.** Continued Granodiorite.

| Stone | Fraction | LAB 1<br>Ba<br>µg/l | min<br>r<br>mg/m <sup>2</sup> | max<br>r<br>mg/m <sup>2</sup> | LAB 2<br>Ba<br>µg/l | min<br>r<br>mg/m <sup>2</sup> | max<br>r<br>mg/m <sup>2</sup> |
|-------|----------|---------------------|-------------------------------|-------------------------------|---------------------|-------------------------------|-------------------------------|
| 1     | 1        | 444                 | 35.56                         | 35.56                         | 0.99                | 0.08                          | 0.08                          |
| 1     | 2        | 455                 | 36.36                         | 36.36                         | 0.91                | 0.07                          | 0.07                          |
| 1     | 3        | 414                 | 33.16                         | 33.16                         | 1.18                | 0.09                          | 0.09                          |
| 1     | 4        | 445                 | 35.64                         | 35.64                         | 1.05                | 0.08                          | 0.08                          |
| 1     | 5        | 442                 | 35.32                         | 35.32                         | 0.89                | 0.07                          | 0.07                          |
| 1     | 6        | 132                 | 10.54                         | 10.54                         | 0.83                | 0.07                          | 0.07                          |
| 1     | 7        | 443                 | 35.48                         | 35.48                         | 1.08                | 0.09                          | 0.09                          |
| 1     | 8        | 330                 | 26.38                         | 26.38                         | 1.24                | 0.10                          | 0.10                          |
| 2     | 1        | 442                 | 35.34                         | 35.34                         | 0.9                 | 0.07                          | 0.07                          |
| 2     | 2        | 510                 | 40.79                         | 40.79                         | 1.0                 | 0.08                          | 0.08                          |
| 2     | 3        | 424                 | 33.95                         | 33.95                         | 1.44                | 0.12                          | 0.12                          |
| 2     | 4        | 482                 | 38.55                         | 38.55                         | 0.83                | 0.07                          | 0.07                          |
| 2     | 5        | 495                 | 39.64                         | 39.64                         | 1.14                | 0.09                          | 0.09                          |
| 2     | 6        | 456                 | 36.52                         | 36.52                         | 1.22                | 0.10                          | 0.10                          |
| 2     | 7        | 452                 | 36.18                         | 36.18                         | 1.54                | 0.12                          | 0.12                          |
| 2     | 8        | 415                 | 33.17                         | 33.17                         | 1.35                | 0.11                          | 0.11                          |
| 3     | 1        | 482                 | 38.57                         | 38.57                         | 1.0                 | 0.08                          | 0.08                          |
| 3     | 2        | 465                 | 37.18                         | 37.18                         | 0.81                | 0.06                          | 0.06                          |
| 3     | 3        | 448                 | 35.85                         | 35.85                         | 1.23                | 0.10                          | 0.10                          |
| 3     | 4        | 467                 | 37.34                         | 37.34                         | 1.07                | 0.09                          | 0.09                          |
| 3     | 5        | 401                 | 32.05                         | 32.05                         | 0.83                | 0.07                          | 0.07                          |
| 3     | 6        | 389                 | 31.09                         | 31.09                         | 0.97                | 0.08                          | 0.08                          |
| 3     | 7        | 459                 | 36.73                         | 36.73                         | 0.9                 | 0.07                          | 0.07                          |
| 3     | 8        | 404                 | 32.33                         | 32.33                         | 0.8                 | 0.07                          | 0.07                          |
| 4     | 1        | 434                 | 34.68                         | 34.68                         | 1.14                | 0.09                          | 0.09                          |
| 4     | 2        | 430                 | 34.42                         | 34.42                         | 0.92                | 0.07                          | 0.07                          |
| 4     | 3        | 428                 | 34.26                         | 34.26                         | 1.41                | 0.11                          | 0.11                          |
| 4     | 4        | 421                 | 33.71                         | 33.71                         | 0.83                | 0.07                          | 0.07                          |
| 4     | 5        | 437                 | 34.91                         | 34.91                         | 1.08                | 0.09                          | 0.09                          |
| 4     | 6        | 448                 | 35.79                         | 35.79                         | 1.08                | 0.09                          | 0.09                          |
| 4     | 7        | 445                 | 35.60                         | 35.60                         | 1.48                | 0.12                          | 0.12                          |
| 4     | 8        | 892                 | 71.33                         | 71.33                         | 1.50                | 0.12                          | 0.12                          |
| 5     | 1        | 486                 | 38.90                         | 38.90                         | 0.9                 | 0.08                          | 0.08                          |
| 5     | 2        | 464                 | 37.16                         | 37.16                         | 1.0                 | 0.08                          | 0.08                          |
| 5     | 3        | 374                 | 29.93                         | 29.93                         | 1.15                | 0.09                          | 0.09                          |
| 5     | 4        | 458                 | 36.61                         | 36.61                         | 0.80                | 0.06                          | 0.06                          |
| 5     | 5        | 466                 | 37.25                         | 37.25                         | 1.20                | 0.10                          | 0.10                          |
| 5     | 6        | 471                 | 37.69                         | 37.69                         | 1.47                | 0.12                          | 0.12                          |
| 5     | 7        | 486                 | 38.85                         | 38.85                         | 2.71                | 0.22                          | 0.22                          |
| 5     | 8        | 331                 | 26.48                         | 26.48                         | 2.23                | 0.18                          | 0.18                          |
|       |          |                     | Σ min                         | Σ max                         |                     | Σ min                         | Σ max                         |
| 1     |          |                     | 248                           | 248                           |                     | 0.65                          | 0.65                          |
| 2     |          |                     | 294                           | 294                           |                     | 0.75                          | 0.75                          |
| 3     |          |                     | 281                           | 281                           |                     | 0.61                          | 0.61                          |
| 4     |          |                     | 315                           | 315                           |                     | 0.75                          | 0.75                          |
| 5     |          |                     | 283                           | 283                           |                     | 0.92                          | 0.92                          |
| Mean  |          |                     | 284                           | 284                           |                     | 0.74                          | 0.74                          |
| SD    |          |                     | 24                            | 24                            |                     | 0.12                          | 0.12                          |

**Table E.** Continued Granodiorite.

| Stone | Fraction | LAB 1<br>Cd<br>µg/l | min<br>r<br>mg/m <sup>2</sup> | max<br>r<br>mg/m <sup>2</sup> | LAB 2<br>Cd<br>µg/l | min<br>r<br>mg/m <sup>2</sup> | max<br>r<br>mg/m <sup>2</sup> |
|-------|----------|---------------------|-------------------------------|-------------------------------|---------------------|-------------------------------|-------------------------------|
| 1     | 1        | 0.03                | 0.002                         | 0.002                         | <0.02               | 0.000                         | 0.002                         |
| 1     | 2        | 0.03                | 0.002                         | 0.002                         | <0.02               | 0.000                         | 0.002                         |
| 1     | 3        | 0.02                | 0.002                         | 0.002                         | <0.02               | 0.000                         | 0.002                         |
| 1     | 4        | 0.03                | 0.002                         | 0.002                         | <0.02               | 0.000                         | 0.002                         |
| 1     | 5        | 0.02                | 0.002                         | 0.002                         | <0.02               | 0.000                         | 0.002                         |
| 1     | 6        | 0.02                | 0.001                         | 0.001                         | <0.02               | 0.000                         | 0.002                         |
| 1     | 7        | 0.03                | 0.002                         | 0.002                         | <0.02               | 0.000                         | 0.002                         |
| 1     | 8        | 0.03                | 0.002                         | 0.002                         | <0.02               | 0.000                         | 0.002                         |
| 2     | 1        | 0.03                | 0.002                         | 0.002                         | <0.02               | 0.000                         | 0.002                         |
| 2     | 2        | 0.02                | 0.002                         | 0.002                         | <0.02               | 0.000                         | 0.002                         |
| 2     | 3        | 0.03                | 0.002                         | 0.002                         | <0.02               | 0.000                         | 0.002                         |
| 2     | 4        | 0.03                | 0.002                         | 0.002                         | <0.02               | 0.000                         | 0.002                         |
| 2     | 5        | 0.03                | 0.003                         | 0.003                         | <0.02               | 0.000                         | 0.002                         |
| 2     | 6        | 0.03                | 0.002                         | 0.002                         | <0.02               | 0.000                         | 0.002                         |
| 2     | 7        | 0.03                | 0.002                         | 0.002                         | <0.02               | 0.000                         | 0.002                         |
| 2     | 8        | 0.03                | 0.002                         | 0.002                         | <0.02               | 0.000                         | 0.002                         |
| 3     | 1        | 0.03                | 0.002                         | 0.002                         | <0.02               | 0.000                         | 0.002                         |
| 3     | 2        | 0.03                | 0.002                         | 0.002                         | <0.02               | 0.000                         | 0.002                         |
| 3     | 3        | 0.03                | 0.003                         | 0.003                         | <0.02               | 0.000                         | 0.002                         |
| 3     | 4        | 0.02                | 0.002                         | 0.002                         | <0.02               | 0.000                         | 0.002                         |
| 3     | 5        | 0.02                | 0.002                         | 0.002                         | <0.02               | 0.000                         | 0.002                         |
| 3     | 6        | 0.02                | 0.002                         | 0.002                         | <0.02               | 0.000                         | 0.002                         |
| 3     | 7        | 0.02                | 0.002                         | 0.002                         | <0.02               | 0.000                         | 0.002                         |
| 3     | 8        | 0.02                | 0.002                         | 0.002                         | <0.02               | 0.000                         | 0.002                         |
| 4     | 1        | 0.03                | 0.002                         | 0.002                         | <0.02               | 0.000                         | 0.002                         |
| 4     | 2        | 0.03                | 0.002                         | 0.002                         | <0.02               | 0.000                         | 0.002                         |
| 4     | 3        | 0.03                | 0.002                         | 0.002                         | <0.02               | 0.000                         | 0.002                         |
| 4     | 4        | 0.02                | 0.002                         | 0.002                         | <0.02               | 0.000                         | 0.002                         |
| 4     | 5        | 0.03                | 0.002                         | 0.002                         | <0.02               | 0.000                         | 0.002                         |
| 4     | 6        | 0.03                | 0.002                         | 0.002                         | <0.02               | 0.000                         | 0.002                         |
| 4     | 7        | 0.03                | 0.002                         | 0.002                         | <0.02               | 0.000                         | 0.002                         |
| 4     | 8        | 0.04                | 0.003                         | 0.003                         | <0.02               | 0.000                         | 0.002                         |
| 5     | 1        | 0.03                | 0.002                         | 0.002                         | <0.02               | 0.000                         | 0.002                         |
| 5     | 2        | 0.03                | 0.002                         | 0.002                         | <0.02               | 0.000                         | 0.002                         |
| 5     | 3        | 0.02                | 0.002                         | 0.002                         | <0.02               | 0.000                         | 0.002                         |
| 5     | 4        | 0.03                | 0.002                         | 0.002                         | <0.02               | 0.000                         | 0.002                         |
| 5     | 5        | 0.03                | 0.002                         | 0.002                         | <0.02               | 0.000                         | 0.002                         |
| 5     | 6        | 0.03                | 0.003                         | 0.003                         | <0.02               | 0.000                         | 0.002                         |
| 5     | 7        | 0.02                | 0.002                         | 0.002                         | <0.02               | 0.000                         | 0.002                         |
| 5     | 8        | 0.02                | 0.002                         | 0.002                         | <0.02               | 0.000                         | 0.002                         |
|       |          |                     | Σ min                         | Σ max                         |                     | Σ min                         | Σ max                         |
| 1     |          |                     | 0.017                         | 0.017                         |                     | 0.000                         | 0.013                         |
| 2     |          |                     | 0.018                         | 0.018                         |                     | 0.000                         | 0.013                         |
| 3     |          |                     | 0.017                         | 0.017                         |                     | 0.000                         | 0.013                         |
| 4     |          |                     | 0.019                         | 0.019                         |                     | 0.000                         | 0.013                         |
| 5     |          |                     | 0.017                         | 0.017                         |                     | 0.000                         | 0.013                         |
| Mean  |          |                     | 0.017                         | 0.017                         |                     | 0.000                         | 0.013                         |
| SD    |          |                     | 0.001                         | 0.001                         |                     | 0.000                         | 0.000                         |

**Table E.** Continued Granodiorite.

| Stone | Fraction | LAB 1<br>Co<br>µg/l | min<br>r<br>mg/m <sup>2</sup> | max<br>r<br>mg/m <sup>2</sup> | LAB 2<br>Co<br>µg/l | min<br>r<br>mg/m <sup>2</sup> | max<br>r<br>mg/m <sup>2</sup> |
|-------|----------|---------------------|-------------------------------|-------------------------------|---------------------|-------------------------------|-------------------------------|
| 1     | 1        | 0.17                | 0.014                         | 0.014                         | 0.03                | 0.003                         | 0.003                         |
| 1     | 2        | 0.20                | 0.016                         | 0.016                         | <0.02               | 0.000                         | 0.002                         |
| 1     | 3        | 0.23                | 0.019                         | 0.019                         | <0.02               | 0.000                         | 0.002                         |
| 1     | 4        | 0.25                | 0.020                         | 0.020                         | <0.02               | 0.000                         | 0.002                         |
| 1     | 5        | 0.45                | 0.036                         | 0.036                         | 0.03                | 0.002                         | 0.002                         |
| 1     | 6        | 0.44                | 0.035                         | 0.035                         | 0.03                | 0.002                         | 0.002                         |
| 1     | 7        | 0.51                | 0.041                         | 0.041                         | 0.04                | 0.003                         | 0.003                         |
| 1     | 8        | 0.68                | 0.055                         | 0.055                         | 0.04                | 0.003                         | 0.003                         |
| 2     | 1        | 0.10                | 0.008                         | 0.008                         | 0.02                | 0.002                         | 0.002                         |
| 2     | 2        | 0.12                | 0.010                         | 0.010                         | <0.02               | 0.000                         | 0.002                         |
| 2     | 3        | 0.12                | 0.009                         | 0.009                         | <0.02               | 0.000                         | 0.002                         |
| 2     | 4        | 0.11                | 0.009                         | 0.009                         | <0.02               | 0.000                         | 0.002                         |
| 2     | 5        | 0.15                | 0.012                         | 0.012                         | 0.03                | 0.002                         | 0.002                         |
| 2     | 6        | 0.16                | 0.013                         | 0.013                         | 0.04                | 0.003                         | 0.003                         |
| 2     | 7        | 0.16                | 0.013                         | 0.013                         | 0.05                | 0.004                         | 0.004                         |
| 2     | 8        | 0.20                | 0.016                         | 0.016                         | 0.05                | 0.004                         | 0.004                         |
| 3     | 1        | 0.12                | 0.009                         | 0.009                         | <0.02               | 0.000                         | 0.002                         |
| 3     | 2        | 0.11                | 0.009                         | 0.009                         | <0.02               | 0.000                         | 0.002                         |
| 3     | 3        | 0.13                | 0.011                         | 0.011                         | <0.02               | 0.000                         | 0.002                         |
| 3     | 4        | 0.14                | 0.011                         | 0.011                         | <0.02               | 0.000                         | 0.002                         |
| 3     | 5        | 0.26                | 0.021                         | 0.021                         | 0.03                | 0.002                         | 0.002                         |
| 3     | 6        | 0.24                | 0.019                         | 0.019                         | 0.04                | 0.003                         | 0.003                         |
| 3     | 7        | 0.22                | 0.017                         | 0.017                         | 0.05                | 0.004                         | 0.004                         |
| 3     | 8        | 0.23                | 0.018                         | 0.018                         | 0.06                | 0.004                         | 0.004                         |
| 4     | 1        | 0.14                | 0.011                         | 0.011                         | 0.04                | 0.003                         | 0.003                         |
| 4     | 2        | 0.12                | 0.010                         | 0.010                         | <0.02               | 0.000                         | 0.002                         |
| 4     | 3        | 0.17                | 0.014                         | 0.014                         | <0.02               | 0.000                         | 0.002                         |
| 4     | 4        | 0.22                | 0.018                         | 0.018                         | <0.02               | 0.000                         | 0.002                         |
| 4     | 5        | 0.64                | 0.051                         | 0.051                         | 0.02                | 0.002                         | 0.002                         |
| 4     | 6        | 0.64                | 0.051                         | 0.051                         | 0.02                | 0.002                         | 0.002                         |
| 4     | 7        | 0.87                | 0.069                         | 0.069                         | 0.03                | 0.002                         | 0.002                         |
| 4     | 8        | 0.81                | 0.065                         | 0.065                         | 0.03                | 0.002                         | 0.002                         |
| 5     | 1        | 0.09                | 0.007                         | 0.007                         | 0.04                | 0.003                         | 0.003                         |
| 5     | 2        | 0.10                | 0.008                         | 0.008                         | <0.02               | 0.000                         | 0.002                         |
| 5     | 3        | 0.10                | 0.008                         | 0.008                         | <0.02               | 0.000                         | 0.002                         |
| 5     | 4        | 0.10                | 0.008                         | 0.008                         | <0.02               | 0.000                         | 0.002                         |
| 5     | 5        | 0.12                | 0.009                         | 0.009                         | <0.02               | 0.000                         | 0.002                         |
| 5     | 6        | 0.13                | 0.010                         | 0.010                         | <0.02               | 0.000                         | 0.002                         |
| 5     | 7        | 0.12                | 0.010                         | 0.010                         | 0.02                | 0.000                         | 0.002                         |
| 5     | 8        | 0.15                | 0.012                         | 0.012                         | 0.04                | 0.000                         | 0.003                         |
|       |          |                     | Σ min                         | Σ max                         |                     | Σ min                         | Σ max                         |
| 1     |          |                     | 0.24                          | 0.24                          |                     | 0.01                          | 0.02                          |
| 2     |          |                     | 0.09                          | 0.09                          |                     | 0.01                          | 0.02                          |
| 3     |          |                     | 0.12                          | 0.12                          |                     | 0.01                          | 0.02                          |
| 4     |          |                     | 0.29                          | 0.29                          |                     | 0.01                          | 0.02                          |
| 5     |          |                     | 0.07                          | 0.07                          |                     | 0.00                          | 0.02                          |
| Mean  |          |                     | 0.161                         | 0.161                         |                     | 0.01                          | 0.02                          |
| SD    |          |                     | 0.096                         | 0.096                         |                     | 0.00                          | 0.00                          |

**Table E.** Continued Granodiorite.

| Stone | Fraction | LAB 1<br>Cr<br>µg/l | min<br>r<br>mg/m <sup>2</sup> | max<br>r<br>mg/m <sup>2</sup> | LAB 2<br>Cr<br>µg/l | min<br>r<br>mg/m <sup>2</sup> | max<br>r<br>mg/m <sup>2</sup> |
|-------|----------|---------------------|-------------------------------|-------------------------------|---------------------|-------------------------------|-------------------------------|
| 1     | 1        | 0.06                | 0.005                         | 0.005                         | <0.05               | 0.0                           | 0.004                         |
| 1     | 2        | 0.12                | 0.009                         | 0.009                         | <0.05               | 0.0                           | 0.004                         |
| 1     | 3        | 0.12                | 0.010                         | 0.010                         | <0.05               | 0.0                           | 0.004                         |
| 1     | 4        | 0.06                | 0.000                         | 0.005                         | <0.05               | 0.0                           | 0.004                         |
| 1     | 5        | 0.07                | 0.006                         | 0.006                         | <0.05               | 0.0                           | 0.004                         |
| 1     | 6        | 0.06                | 0.000                         | 0.005                         | <0.05               | 0.0                           | 0.004                         |
| 1     | 7        | 0.06                | 0.005                         | 0.005                         | <0.05               | 0.0                           | 0.004                         |
| 1     | 8        | 0.06                | 0.000                         | 0.005                         | <0.05               | 0.0                           | 0.004                         |
| 2     | 1        | 0.08                | 0.006                         | 0.006                         | <0.05               | 0.0                           | 0.004                         |
| 2     | 2        | 0.10                | 0.008                         | 0.008                         | <0.05               | 0.0                           | 0.004                         |
| 2     | 3        | 0.43                | 0.035                         | 0.035                         | <0.05               | 0.0                           | 0.004                         |
| 2     | 4        | 0.11                | 0.009                         | 0.009                         | <0.05               | 0.0                           | 0.004                         |
| 2     | 5        | 0.07                | 0.005                         | 0.005                         | <0.05               | 0.0                           | 0.004                         |
| 2     | 6        | 0.07                | 0.006                         | 0.006                         | <0.05               | 0.0                           | 0.004                         |
| 2     | 7        | 0.06                | 0.000                         | 0.005                         | <0.05               | 0.0                           | 0.004                         |
| 2     | 8        | 0.06                | 0.000                         | 0.005                         | <0.05               | 0.0                           | 0.004                         |
| 3     | 1        | 0.08                | 0.006                         | 0.006                         | <0.05               | 0.0                           | 0.004                         |
| 3     | 2        | 0.10                | 0.008                         | 0.008                         | <0.05               | 0.0                           | 0.004                         |
| 3     | 3        | 0.24                | 0.019                         | 0.019                         | <0.05               | 0.0                           | 0.004                         |
| 3     | 4        | 0.06                | 0.005                         | 0.005                         | <0.05               | 0.0                           | 0.004                         |
| 3     | 5        | 0.06                | 0.005                         | 0.005                         | <0.05               | 0.0                           | 0.004                         |
| 3     | 6        | 0.06                | 0.005                         | 0.005                         | <0.05               | 0.0                           | 0.004                         |
| 3     | 7        | 0.06                | 0.000                         | 0.005                         | <0.05               | 0.0                           | 0.004                         |
| 3     | 8        | 0.06                | 0.000                         | 0.005                         | <0.05               | 0.0                           | 0.004                         |
| 4     | 1        | 0.06                | 0.005                         | 0.005                         | <0.05               | 0.0                           | 0.004                         |
| 4     | 2        | 0.07                | 0.006                         | 0.006                         | <0.05               | 0.0                           | 0.004                         |
| 4     | 3        | 0.06                | 0.005                         | 0.005                         | <0.05               | 0.0                           | 0.004                         |
| 4     | 4        | 0.10                | 0.008                         | 0.008                         | <0.05               | 0.0                           | 0.004                         |
| 4     | 5        | 0.14                | 0.012                         | 0.012                         | <0.05               | 0.0                           | 0.004                         |
| 4     | 6        | 0.07                | 0.006                         | 0.006                         | <0.05               | 0.0                           | 0.004                         |
| 4     | 7        | 0.09                | 0.007                         | 0.007                         | <0.05               | 0.0                           | 0.004                         |
| 4     | 8        | 0.45                | 0.036                         | 0.036                         | <0.05               | 0.0                           | 0.004                         |
| 5     | 1        | 0.09                | 0.007                         | 0.007                         | <0.05               | 0.0                           | 0.004                         |
| 5     | 2        | 0.08                | 0.007                         | 0.007                         | <0.05               | 0.0                           | 0.004                         |
| 5     | 3        | 0.08                | 0.007                         | 0.007                         | <0.05               | 0.0                           | 0.004                         |
| 5     | 4        | 0.07                | 0.006                         | 0.006                         | <0.05               | 0.0                           | 0.004                         |
| 5     | 5        | 0.08                | 0.007                         | 0.007                         | <0.05               | 0.0                           | 0.004                         |
| 5     | 6        | 0.08                | 0.006                         | 0.006                         | <0.05               | 0.0                           | 0.004                         |
| 5     | 7        | 0.07                | 0.006                         | 0.006                         | <0.05               | 0.0                           | 0.004                         |
| 5     | 8        | 0.06                | 0.000                         | 0.005                         | <0.05               | 0.0                           | 0.004                         |
|       |          |                     | Σ min                         | Σ max                         |                     | Σ min                         | Σ max                         |
| 1     |          |                     | 0.035                         | 0.049                         |                     | 0.000                         | 0.032                         |
| 2     |          |                     | 0.069                         | 0.079                         |                     | 0.000                         | 0.032                         |
| 3     |          |                     | 0.049                         | 0.058                         |                     | 0.000                         | 0.032                         |
| 4     |          |                     | 0.084                         | 0.084                         |                     | 0.000                         | 0.032                         |
| 5     |          |                     | 0.045                         | 0.050                         |                     | 0.000                         | 0.032                         |
| Mean  |          |                     | 0.056                         | 0.064                         |                     | 0.000                         | 0.032                         |
| SD    |          |                     | 0.020                         | 0.016                         |                     | 0.000                         | 0.000                         |

**Table E.** Continued Granodiorite.

| Stone | Fraction | LAB 1<br>Cu<br>µg/l | min<br>r<br>mg/m <sup>2</sup> | max<br>r<br>mg/m <sup>2</sup> | LAB 2<br>Cu<br>µg/l | min<br>r<br>mg/m <sup>2</sup> | max<br>r<br>mg/m <sup>2</sup> |
|-------|----------|---------------------|-------------------------------|-------------------------------|---------------------|-------------------------------|-------------------------------|
| 1     | 1        | 4.39                | 0.351                         | 0.351                         | 0.12                | 0.010                         | 0.010                         |
| 1     | 2        | 2.39                | 0.191                         | 0.191                         | <0.07               | 0.000                         | 0.006                         |
| 1     | 3        | 2.20                | 0.176                         | 0.176                         | <0.07               | 0.000                         | 0.006                         |
| 1     | 4        | 1.85                | 0.148                         | 0.148                         | <0.07               | 0.000                         | 0.006                         |
| 1     | 5        | 2.12                | 0.170                         | 0.170                         | <0.07               | 0.000                         | 0.006                         |
| 1     | 6        | 2.29                | 0.183                         | 0.183                         | <0.07               | 0.000                         | 0.006                         |
| 1     | 7        | 2.54                | 0.203                         | 0.203                         | <0.07               | 0.000                         | 0.006                         |
| 1     | 8        | 1.61                | 0.129                         | 0.129                         | <0.07               | 0.000                         | 0.006                         |
| 2     | 1        | 5.39                | 0.431                         | 0.431                         | <0.07               | 0.000                         | 0.006                         |
| 2     | 2        | 3.09                | 0.247                         | 0.247                         | <0.07               | 0.000                         | 0.006                         |
| 2     | 3        | 3.04                | 0.243                         | 0.243                         | <0.07               | 0.000                         | 0.006                         |
| 2     | 4        | 2.42                | 0.194                         | 0.194                         | <0.07               | 0.000                         | 0.006                         |
| 2     | 5        | 3.05                | 0.244                         | 0.244                         | <0.07               | 0.000                         | 0.006                         |
| 2     | 6        | 2.63                | 0.210                         | 0.210                         | <0.07               | 0.000                         | 0.006                         |
| 2     | 7        | 2.63                | 0.210                         | 0.210                         | <0.07               | 0.000                         | 0.006                         |
| 2     | 8        | 1.53                | 0.122                         | 0.122                         | <0.07               | 0.000                         | 0.006                         |
| 3     | 1        | 4.44                | 0.355                         | 0.355                         | 0.08                | 0.006                         | 0.006                         |
| 3     | 2        | 2.96                | 0.237                         | 0.237                         | <0.07               | 0.000                         | 0.006                         |
| 3     | 3        | 2.69                | 0.215                         | 0.215                         | <0.07               | 0.000                         | 0.006                         |
| 3     | 4        | 2.25                | 0.180                         | 0.180                         | <0.07               | 0.000                         | 0.006                         |
| 3     | 5        | 2.49                | 0.199                         | 0.199                         | <0.07               | 0.000                         | 0.006                         |
| 3     | 6        | 2.72                | 0.218                         | 0.218                         | <0.07               | 0.000                         | 0.006                         |
| 3     | 7        | 2.04                | 0.163                         | 0.163                         | <0.07               | 0.000                         | 0.006                         |
| 3     | 8        | 1.82                | 0.146                         | 0.146                         | <0.07               | 0.000                         | 0.006                         |
| 4     | 1        | 3.57                | 0.285                         | 0.285                         | 1.16                | 0.093                         | 0.093                         |
| 4     | 2        | 2.78                | 0.223                         | 0.223                         | <0.07               | 0.000                         | 0.006                         |
| 4     | 3        | 2.33                | 0.187                         | 0.187                         | <0.07               | 0.000                         | 0.006                         |
| 4     | 4        | 2.41                | 0.193                         | 0.193                         | <0.07               | 0.000                         | 0.006                         |
| 4     | 5        | 2.23                | 0.178                         | 0.178                         | <0.07               | 0.000                         | 0.006                         |
| 4     | 6        | 2.02                | 0.162                         | 0.162                         | <0.07               | 0.000                         | 0.006                         |
| 4     | 7        | 2.44                | 0.195                         | 0.195                         | <0.07               | 0.000                         | 0.006                         |
| 4     | 8        | 1.25                | 0.100                         | 0.100                         | <0.07               | 0.000                         | 0.006                         |
| 5     | 1        | 3.36                | 0.269                         | 0.269                         | 0.14                | 0.011                         | 0.011                         |
| 5     | 2        | 2.25                | 0.180                         | 0.180                         | <0.07               | 0.000                         | 0.006                         |
| 5     | 3        | 2.05                | 0.164                         | 0.164                         | <0.07               | 0.000                         | 0.006                         |
| 5     | 4        | 2.20                | 0.176                         | 0.176                         | <0.07               | 0.000                         | 0.006                         |
| 5     | 5        | 2.38                | 0.190                         | 0.190                         | <0.07               | 0.000                         | 0.006                         |
| 5     | 6        | 2.48                | 0.198                         | 0.198                         | <0.07               | 0.000                         | 0.006                         |
| 5     | 7        | 1.85                | 0.148                         | 0.148                         | <0.07               | 0.000                         | 0.006                         |
| 5     | 8        | 1.01                | 0.081                         | 0.081                         | <0.07               | 0.000                         | 0.006                         |
|       |          |                     | Σ min                         | Σ max                         |                     | Σ min                         | Σ max                         |
| 1     |          |                     | 1.552                         | 1.552                         |                     | 0.010                         | 0.049                         |
| 2     |          |                     | 1.902                         | 1.902                         |                     | 0.000                         | 0.045                         |
| 3     |          |                     | 1.714                         | 1.714                         |                     | 0.006                         | 0.046                         |
| 4     |          |                     | 1.522                         | 1.522                         |                     | 0.093                         | 0.132                         |
| 5     |          |                     | 1.406                         | 1.406                         |                     | 0.011                         | 0.050                         |
| Mean  |          |                     | 1.619                         | 1.619                         |                     | 0.024                         | 0.064                         |
| SD    |          |                     | 0.193                         | 0.193                         |                     | 0.039                         | 0.038                         |

**Table E.** Continued Granodiorite.

| Stone | Fraction | LAB 1<br>Mn<br>µg/l | min<br>r<br>mg/m <sup>2</sup> | max<br>r<br>mg/m <sup>2</sup> | LAB 2<br>Mn<br>µg/l | min<br>r<br>mg/m <sup>2</sup> | max<br>r<br>mg/m <sup>2</sup> |
|-------|----------|---------------------|-------------------------------|-------------------------------|---------------------|-------------------------------|-------------------------------|
| 1     | 1        | 1.24                | 0.099                         | 0.099                         | 0.43                | 0.034                         | 0.034                         |
| 1     | 2        | 0.80                | 0.064                         | 0.064                         | 0.42                | 0.034                         | 0.034                         |
| 1     | 3        | 0.97                | 0.078                         | 0.078                         | 0.46                | 0.037                         | 0.037                         |
| 1     | 4        | 0.96                | 0.077                         | 0.077                         | 0.37                | 0.030                         | 0.030                         |
| 1     | 5        | 1.97                | 0.158                         | 0.158                         | 0.49                | 0.039                         | 0.039                         |
| 1     | 6        | 2.10                | 0.168                         | 0.168                         | 0.37                | 0.030                         | 0.030                         |
| 1     | 7        | 2.74                | 0.220                         | 0.220                         | 0.55                | 0.044                         | 0.044                         |
| 1     | 8        | 5.00                | 0.400                         | 0.400                         | 0.40                | 0.032                         | 0.032                         |
| 2     | 1        | 1.63                | 0.130                         | 0.130                         | 0.31                | 0.025                         | 0.025                         |
| 2     | 2        | 1.26                | 0.101                         | 0.101                         | 0.40                | 0.032                         | 0.032                         |
| 2     | 3        | 1.13                | 0.090                         | 0.090                         | 0.48                | 0.038                         | 0.038                         |
| 2     | 4        | 1.20                | 0.096                         | 0.096                         | 0.45                | 0.036                         | 0.036                         |
| 2     | 5        | 1.51                | 0.121                         | 0.121                         | 0.54                | 0.043                         | 0.043                         |
| 2     | 6        | 1.40                | 0.112                         | 0.112                         | 0.40                | 0.032                         | 0.032                         |
| 2     | 7        | 1.21                | 0.097                         | 0.097                         | 0.57                | 0.045                         | 0.045                         |
| 2     | 8        | 1.24                | 0.099                         | 0.099                         | 0.45                | 0.036                         | 0.036                         |
| 3     | 1        | 1.16                | 0.093                         | 0.093                         | 0.31                | 0.025                         | 0.025                         |
| 3     | 2        | 0.66                | 0.053                         | 0.053                         | 0.33                | 0.026                         | 0.026                         |
| 3     | 3        | 0.68                | 0.055                         | 0.055                         | 0.35                | 0.028                         | 0.028                         |
| 3     | 4        | 0.77                | 0.061                         | 0.061                         | 0.36                | 0.029                         | 0.029                         |
| 3     | 5        | 1.51                | 0.121                         | 0.121                         | 0.60                | 0.048                         | 0.048                         |
| 3     | 6        | 1.42                | 0.113                         | 0.113                         | 0.59                | 0.048                         | 0.048                         |
| 3     | 7        | 1.32                | 0.105                         | 0.105                         | 0.86                | 0.069                         | 0.069                         |
| 3     | 8        | 1.40                | 0.112                         | 0.112                         | 0.64                | 0.051                         | 0.051                         |
| 4     | 1        | 0.57                | 0.046                         | 0.046                         | 0.77                | 0.062                         | 0.062                         |
| 4     | 2        | 0.40                | 0.032                         | 0.032                         | 0.69                | 0.055                         | 0.055                         |
| 4     | 3        | 0.51                | 0.041                         | 0.041                         | 0.81                | 0.065                         | 0.065                         |
| 4     | 4        | 0.62                | 0.050                         | 0.050                         | 0.69                | 0.055                         | 0.055                         |
| 4     | 5        | 1.77                | 0.142                         | 0.142                         | 0.69                | 0.055                         | 0.055                         |
| 4     | 6        | 1.87                | 0.149                         | 0.149                         | 0.53                | 0.043                         | 0.043                         |
| 4     | 7        | 3.00                | 0.240                         | 0.240                         | 0.72                | 0.057                         | 0.057                         |
| 4     | 8        | 4.05                | 0.324                         | 0.324                         | 0.53                | 0.042                         | 0.042                         |
| 5     | 1        | 1.07                | 0.086                         | 0.086                         | 0.44                | 0.035                         | 0.035                         |
| 5     | 2        | 1.08                | 0.086                         | 0.086                         | 0.54                | 0.043                         | 0.043                         |
| 5     | 3        | 0.92                | 0.074                         | 0.074                         | 0.61                | 0.048                         | 0.048                         |
| 5     | 4        | 0.91                | 0.073                         | 0.073                         | 0.61                | 0.048                         | 0.048                         |
| 5     | 5        | 1.35                | 0.108                         | 0.108                         | 0.63                | 0.051                         | 0.051                         |
| 5     | 6        | 1.18                | 0.095                         | 0.095                         | 0.54                | 0.043                         | 0.043                         |
| 5     | 7        | 1.24                | 0.100                         | 0.100                         | 0.93                | 0.000                         | 0.075                         |
| 5     | 8        | 1.24                | 0.099                         | 0.099                         | 0.97                | 0.000                         | 0.077                         |
|       |          |                     | Σ min                         | Σ max                         |                     | Σ min                         | Σ max                         |
| 1     |          |                     | 1.262                         | 1.262                         |                     | 0.280                         | 0.280                         |
| 2     |          |                     | 0.847                         | 0.847                         |                     | 0.287                         | 0.287                         |
| 3     |          |                     | 0.713                         | 0.713                         |                     | 0.323                         | 0.323                         |
| 4     |          |                     | 1.024                         | 1.024                         |                     | 0.435                         | 0.435                         |
| 5     |          |                     | 0.720                         | 0.720                         |                     | 0.269                         | 0.421                         |
| Mean  |          |                     | 0.913                         | 0.913                         |                     | 0.319                         | 0.349                         |
| SD    |          |                     | 0.232                         | 0.232                         |                     | 0.07                          | 0.07                          |

**Table E.** Continued Granodiorite.

| Stone | Fraction | LAB 1<br>Mo<br>µg/l | min<br>r<br>mg/m <sup>2</sup> | max<br>r<br>mg/m <sup>2</sup> | LAB 2<br>Mo<br>µg/l | min<br>r<br>mg/m <sup>2</sup> | max<br>r<br>mg/m <sup>2</sup> |
|-------|----------|---------------------|-------------------------------|-------------------------------|---------------------|-------------------------------|-------------------------------|
| 1     | 1        | 0.13                | 0.011                         | 0.011                         | <0.12               | 0.000                         | 0.010                         |
| 1     | 2        | 0.09                | 0.007                         | 0.007                         | <0.12               | 0.000                         | 0.010                         |
| 1     | 3        | 0.08                | 0.006                         | 0.006                         | <0.12               | 0.000                         | 0.010                         |
| 1     | 4        | 0.06                | 0.005                         | 0.005                         | <0.12               | 0.000                         | 0.010                         |
| 1     | 5        | 0.10                | 0.008                         | 0.008                         | <0.12               | 0.000                         | 0.010                         |
| 1     | 6        | 0.07                | 0.005                         | 0.005                         | <0.12               | 0.000                         | 0.010                         |
| 1     | 7        | 0.09                | 0.007                         | 0.007                         | <0.12               | 0.000                         | 0.010                         |
| 1     | 8        | 0.07                | 0.006                         | 0.006                         | <0.12               | 0.000                         | 0.010                         |
| 2     | 1        | 0.05                | 0.004                         | 0.004                         | <0.12               | 0.000                         | 0.010                         |
| 2     | 2        | <0.06               | 0.000                         | 0.005                         | <0.12               | 0.000                         | 0.010                         |
| 2     | 3        | <0.06               | 0.000                         | 0.005                         | <0.12               | 0.000                         | 0.010                         |
| 2     | 4        | <0.06               | 0.000                         | 0.005                         | <0.12               | 0.000                         | 0.010                         |
| 2     | 5        | 0.08                | 0.006                         | 0.006                         | <0.12               | 0.000                         | 0.010                         |
| 2     | 6        | 0.07                | 0.006                         | 0.006                         | <0.12               | 0.000                         | 0.010                         |
| 2     | 7        | 0.10                | 0.008                         | 0.008                         | <0.12               | 0.000                         | 0.010                         |
| 2     | 8        | 0.13                | 0.011                         | 0.011                         | <0.12               | 0.000                         | 0.010                         |
| 3     | 1        | <0.06               | 0.000                         | 0.005                         | <0.12               | 0.000                         | 0.010                         |
| 3     | 2        | <0.06               | 0.000                         | 0.005                         | <0.12               | 0.000                         | 0.010                         |
| 3     | 3        | <0.06               | 0.000                         | 0.005                         | <0.12               | 0.000                         | 0.010                         |
| 3     | 4        | <0.06               | 0.000                         | 0.005                         | <0.12               | 0.000                         | 0.010                         |
| 3     | 5        | 0.09                | 0.007                         | 0.007                         | <0.12               | 0.000                         | 0.010                         |
| 3     | 6        | 0.06                | 0.005                         | 0.005                         | <0.12               | 0.000                         | 0.010                         |
| 3     | 7        | 0.10                | 0.008                         | 0.008                         | <0.12               | 0.000                         | 0.010                         |
| 3     | 8        | 0.12                | 0.009                         | 0.009                         | <0.12               | 0.000                         | 0.010                         |
| 4     | 1        | <0.06               | 0.000                         | 0.005                         | <0.12               | 0.000                         | 0.010                         |
| 4     | 2        | <0.06               | 0.000                         | 0.005                         | <0.12               | 0.000                         | 0.010                         |
| 4     | 3        | <0.06               | 0.000                         | 0.005                         | <0.12               | 0.000                         | 0.010                         |
| 4     | 4        | <0.06               | 0.000                         | 0.005                         | <0.12               | 0.000                         | 0.010                         |
| 4     | 5        | <0.06               | 0.000                         | 0.005                         | <0.12               | 0.000                         | 0.010                         |
| 4     | 6        | <0.06               | 0.000                         | 0.005                         | <0.12               | 0.000                         | 0.010                         |
| 4     | 7        | 0.06                | 0.005                         | 0.005                         | <0.12               | 0.000                         | 0.010                         |
| 4     | 8        | 0.06                | 0.005                         | 0.005                         | <0.12               | 0.000                         | 0.010                         |
| 5     | 1        | 0.06                | 0.005                         | 0.005                         | <0.12               | 0.000                         | 0.010                         |
| 5     | 2        | <0.06               | 0.000                         | 0.005                         | <0.12               | 0.000                         | 0.010                         |
| 5     | 3        | <0.06               | 0.000                         | 0.005                         | <0.12               | 0.000                         | 0.010                         |
| 5     | 4        | <0.06               | 0.000                         | 0.005                         | <0.12               | 0.000                         | 0.010                         |
| 5     | 5        | <0.06               | 0.000                         | 0.005                         | <0.12               | 0.000                         | 0.010                         |
| 5     | 6        | <0.06               | 0.000                         | 0.005                         | <0.12               | 0.000                         | 0.010                         |
| 5     | 7        | <0.06               | 0.000                         | 0.005                         | <0.12               | 0.000                         | 0.010                         |
| 5     | 8        | <0.06               | 0.000                         | 0.005                         | <0.12               | 0.000                         | 0.010                         |
|       |          |                     | Σ min                         | Σ max                         |                     | Σ min                         | Σ max                         |
| 1     |          |                     | 0.055                         | 0.055                         |                     | 0.000                         | 0.077                         |
| 2     |          |                     | 0.036                         | 0.050                         |                     | 0.000                         | 0.077                         |
| 3     |          |                     | 0.029                         | 0.048                         |                     | 0.000                         | 0.077                         |
| 4     |          |                     | 0.009                         | 0.038                         |                     | 0.000                         | 0.077                         |
| 5     |          |                     | 0.005                         | 0.038                         |                     | 0.000                         | 0.077                         |
| Mean  |          |                     | 0.027                         | 0.046                         |                     | 0.000                         | 0.077                         |
| SD    |          |                     | 0.020                         | 0.007                         |                     | 0.000                         | 0.000                         |

**Table E.** Continued Granodiorite.

| Stone | Fraction | LAB 1<br>Ni<br>µg/l | min<br>r<br>mg/m <sup>2</sup> | max<br>r<br>mg/m <sup>2</sup> | LAB 2<br>Ni<br>µg/l | min<br>r<br>mg/m <sup>2</sup> | max<br>r<br>mg/m <sup>2</sup> |
|-------|----------|---------------------|-------------------------------|-------------------------------|---------------------|-------------------------------|-------------------------------|
| 1     | 1        | 0.53                | 0.042                         | 0.042                         | 0.15                | 0.012                         | 0.012                         |
| 1     | 2        | 0.40                | 0.032                         | 0.032                         | 0.07                | 0.006                         | 0.006                         |
| 1     | 3        | 0.43                | 0.035                         | 0.035                         | 0.05                | 0.004                         | 0.004                         |
| 1     | 4        | 0.46                | 0.036                         | 0.036                         | 0.05                | 0.004                         | 0.004                         |
| 1     | 5        | 0.79                | 0.063                         | 0.063                         | 0.07                | 0.006                         | 0.006                         |
| 1     | 6        | 0.73                | 0.058                         | 0.058                         | 0.05                | 0.004                         | 0.004                         |
| 1     | 7        | 0.93                | 0.075                         | 0.075                         | 0.06                | 0.005                         | 0.005                         |
| 1     | 8        | 1.08                | 0.086                         | 0.086                         | 0.08                | 0.006                         | 0.006                         |
| 2     | 1        | 0.63                | 0.051                         | 0.051                         | 0.10                | 0.008                         | 0.008                         |
| 2     | 2        | 0.52                | 0.041                         | 0.041                         | 0.06                | 0.005                         | 0.005                         |
| 2     | 3        | 0.47                | 0.037                         | 0.037                         | 0.07                | 0.005                         | 0.005                         |
| 2     | 4        | 0.39                | 0.031                         | 0.031                         | 0.04                | 0.004                         | 0.004                         |
| 2     | 5        | 0.89                | 0.071                         | 0.071                         | 0.08                | 0.007                         | 0.007                         |
| 2     | 6        | 0.53                | 0.043                         | 0.043                         | 0.08                | 0.006                         | 0.006                         |
| 2     | 7        | 0.66                | 0.053                         | 0.053                         | 0.09                | 0.007                         | 0.007                         |
| 2     | 8        | 0.38                | 0.030                         | 0.030                         | 0.09                | 0.007                         | 0.007                         |
| 3     | 1        | 0.54                | 0.043                         | 0.043                         | 0.15                | 0.012                         | 0.012                         |
| 3     | 2        | 0.36                | 0.028                         | 0.028                         | 0.06                | 0.005                         | 0.005                         |
| 3     | 3        | 0.40                | 0.032                         | 0.032                         | 0.07                | 0.005                         | 0.005                         |
| 3     | 4        | 0.35                | 0.028                         | 0.028                         | 0.07                | 0.006                         | 0.006                         |
| 3     | 5        | 0.93                | 0.075                         | 0.075                         | 0.09                | 0.007                         | 0.007                         |
| 3     | 6        | 0.64                | 0.052                         | 0.052                         | 0.12                | 0.009                         | 0.009                         |
| 3     | 7        | 0.65                | 0.052                         | 0.052                         | 0.10                | 0.008                         | 0.008                         |
| 3     | 8        | 0.47                | 0.038                         | 0.038                         | 0.08                | 0.006                         | 0.006                         |
| 4     | 1        | 0.42                | 0.033                         | 0.033                         | 2.21                | 0.177                         | 0.177                         |
| 4     | 2        | 0.35                | 0.028                         | 0.028                         | 0.07                | 0.006                         | 0.006                         |
| 4     | 3        | 0.49                | 0.039                         | 0.039                         | 0.06                | 0.005                         | 0.005                         |
| 4     | 4        | 0.51                | 0.041                         | 0.041                         | 0.04                | 0.003                         | 0.003                         |
| 4     | 5        | 1.30                | 0.104                         | 0.104                         | 0.05                | 0.004                         | 0.004                         |
| 4     | 6        | 1.18                | 0.094                         | 0.094                         | 0.06                | 0.005                         | 0.005                         |
| 4     | 7        | 1.61                | 0.129                         | 0.129                         | 0.06                | 0.005                         | 0.005                         |
| 4     | 8        | 1.31                | 0.105                         | 0.105                         | 0.06                | 0.005                         | 0.005                         |
| 5     | 1        | 0.40                | 0.032                         | 0.032                         | 0.13                | 0.011                         | 0.011                         |
| 5     | 2        | 0.41                | 0.033                         | 0.033                         | 0.03                | 0.002                         | 0.002                         |
| 5     | 3        | 0.40                | 0.032                         | 0.032                         | 0.04                | 0.000                         | 0.003                         |
| 5     | 4        | 0.32                | 0.026                         | 0.026                         | 0.03                | 0.000                         | 0.003                         |
| 5     | 5        | 0.48                | 0.038                         | 0.038                         | 0.04                | 0.000                         | 0.003                         |
| 5     | 6        | 0.40                | 0.032                         | 0.032                         | <0.03               | 0.000                         | 0.002                         |
| 5     | 7        | 0.35                | 0.028                         | 0.028                         | 0.06                | 0.000                         | 0.004                         |
| 5     | 8        | 0.25                | 0.020                         | 0.020                         | 0.09                | 0.000                         | 0.007                         |
|       |          |                     | Σ min                         | Σ max                         |                     | Σ min                         | Σ max                         |
| 1     |          |                     | 0.428                         | 0.428                         |                     | 0.047                         | 0.047                         |
| 2     |          |                     | 0.357                         | 0.357                         |                     | 0.049                         | 0.049                         |
| 3     |          |                     | 0.347                         | 0.347                         |                     | 0.059                         | 0.059                         |
| 4     |          |                     | 0.574                         | 0.574                         |                     | 0.209                         | 0.209                         |
| 5     |          |                     | 0.241                         | 0.241                         |                     | 0.013                         | 0.036                         |
| Mean  |          |                     | 0.389                         | 0.389                         |                     | 0.075                         | 0.080                         |
| SD    |          |                     | 0.12                          | 0.12                          |                     | 0.077                         | 0.073                         |

**Table E.** Continued Granodiorite.

| Stone | Fraction | LAB 1<br>Pb<br>µg/l | min<br>r<br>mg/m <sup>2</sup> | max<br>r<br>mg/m <sup>2</sup> | LAB 2<br>Pb<br>µg/l | min<br>r<br>mg/m <sup>2</sup> | max<br>r<br>mg/m <sup>2</sup> |
|-------|----------|---------------------|-------------------------------|-------------------------------|---------------------|-------------------------------|-------------------------------|
| 1     | 1        | 0.12                | 0.010                         | 0.010                         | 0.03                | 0.002                         | 0.002                         |
| 1     | 2        | 0.06                | 0.005                         | 0.005                         | <0.03               | 0.000                         | 0.002                         |
| 1     | 3        | 0.07                | 0.005                         | 0.005                         | <0.03               | 0.000                         | 0.002                         |
| 1     | 4        | 0.05                | 0.004                         | 0.004                         | <0.03               | 0.000                         | 0.002                         |
| 1     | 5        | 0.06                | 0.004                         | 0.004                         | <0.03               | 0.000                         | 0.002                         |
| 1     | 6        | 0.08                | 0.006                         | 0.006                         | <0.03               | 0.000                         | 0.002                         |
| 1     | 7        | 0.05                | 0.004                         | 0.004                         | <0.03               | 0.000                         | 0.002                         |
| 1     | 8        | <0.03               | 0.000                         | 0.002                         | <0.03               | 0.000                         | 0.002                         |
| 2     | 1        | 0.35                | 0.028                         | 0.028                         | <0.03               | 0.000                         | 0.002                         |
| 2     | 2        | 0.07                | 0.006                         | 0.006                         | <0.03               | 0.000                         | 0.002                         |
| 2     | 3        | 0.12                | 0.010                         | 0.010                         | <0.03               | 0.000                         | 0.002                         |
| 2     | 4        | 0.10                | 0.008                         | 0.008                         | <0.03               | 0.000                         | 0.002                         |
| 2     | 5        | 0.14                | 0.011                         | 0.011                         | <0.03               | 0.000                         | 0.002                         |
| 2     | 6        | 0.10                | 0.008                         | 0.008                         | <0.03               | 0.000                         | 0.002                         |
| 2     | 7        | 0.06                | 0.005                         | 0.005                         | <0.03               | 0.000                         | 0.002                         |
| 2     | 8        | 0.05                | 0.004                         | 0.004                         | <0.03               | 0.000                         | 0.002                         |
| 3     | 1        | 0.27                | 0.022                         | 0.022                         | <0.03               | 0.000                         | 0.002                         |
| 3     | 2        | 0.04                | 0.003                         | 0.003                         | <0.03               | 0.000                         | 0.002                         |
| 3     | 3        | 0.10                | 0.008                         | 0.008                         | <0.03               | 0.000                         | 0.002                         |
| 3     | 4        | 0.05                | 0.004                         | 0.004                         | <0.03               | 0.000                         | 0.002                         |
| 3     | 5        | 0.19                | 0.015                         | 0.015                         | <0.03               | 0.000                         | 0.002                         |
| 3     | 6        | 0.07                | 0.005                         | 0.005                         | <0.03               | 0.000                         | 0.002                         |
| 3     | 7        | 0.04                | 0.003                         | 0.003                         | <0.03               | 0.000                         | 0.002                         |
| 3     | 8        | 0.04                | 0.003                         | 0.003                         | <0.03               | 0.000                         | 0.002                         |
| 4     | 1        | 0.36                | 0.028                         | 0.028                         | 0.05                | 0.004                         | 0.004                         |
| 4     | 2        | 0.07                | 0.006                         | 0.006                         | <0.03               | 0.000                         | 0.002                         |
| 4     | 3        | 0.09                | 0.008                         | 0.008                         | <0.03               | 0.000                         | 0.002                         |
| 4     | 4        | 0.07                | 0.006                         | 0.006                         | <0.03               | 0.000                         | 0.002                         |
| 4     | 5        | 0.42                | 0.034                         | 0.034                         | <0.03               | 0.000                         | 0.002                         |
| 4     | 6        | 0.07                | 0.006                         | 0.006                         | <0.03               | 0.000                         | 0.002                         |
| 4     | 7        | 0.06                | 0.005                         | 0.005                         | <0.03               | 0.000                         | 0.002                         |
| 4     | 8        | 0.12                | 0.010                         | 0.010                         | <0.03               | 0.000                         | 0.002                         |
| 5     | 1        | 0.45                | 0.036                         | 0.036                         | <0.03               | 0.000                         | 0.002                         |
| 5     | 2        | 0.08                | 0.006                         | 0.006                         | <0.03               | 0.000                         | 0.002                         |
| 5     | 3        | 0.08                | 0.006                         | 0.006                         | <0.03               | 0.000                         | 0.002                         |
| 5     | 4        | 0.06                | 0.005                         | 0.005                         | <0.03               | 0.000                         | 0.002                         |
| 5     | 5        | 0.08                | 0.006                         | 0.006                         | <0.03               | 0.000                         | 0.002                         |
| 5     | 6        | 0.13                | 0.010                         | 0.010                         | <0.03               | 0.000                         | 0.002                         |
| 5     | 7        | 0.06                | 0.004                         | 0.004                         | <0.03               | 0.000                         | 0.002                         |
| 5     | 8        | 0.03                | 0.003                         | 0.003                         | <0.03               | 0.000                         | 0.002                         |
|       |          |                     | Σ min                         | Σ max                         |                     | Σ min                         | Σ max                         |
| 1     |          |                     | 0.039                         | 0.041                         |                     | 0.002                         | 0.019                         |
| 2     |          |                     | 0.080                         | 0.080                         |                     | 0.000                         | 0.019                         |
| 3     |          |                     | 0.064                         | 0.064                         |                     | 0.000                         | 0.019                         |
| 4     |          |                     | 0.102                         | 0.102                         |                     | 0.004                         | 0.021                         |
| 5     |          |                     | 0.077                         | 0.077                         |                     | 0.000                         | 0.019                         |
| Mean  |          |                     | 0.072                         | 0.073                         |                     | 0.001                         | 0.020                         |
| SD    |          | 0.04                | 0.011                         | 0.011                         | 0.03                | 0.000                         | 0.001                         |

**Table E.** Continued Granodiorite.

| Stone | Fraction | LAB 1<br>Sb<br>µg/l | min<br>r<br>mg/m <sup>2</sup> | max<br>r<br>mg/m <sup>2</sup> | LAB 2<br>Sb<br>µg/l | min<br>r<br>mg/m <sup>2</sup> | max<br>r<br>mg/m <sup>2</sup> |
|-------|----------|---------------------|-------------------------------|-------------------------------|---------------------|-------------------------------|-------------------------------|
| 1     | 1        | 0.11                | 0.009                         | 0.009                         | <0.15               | 0.000                         | 0.012                         |
| 1     | 2        | 0.15                | 0.012                         | 0.012                         | <0.15               | 0.000                         | 0.012                         |
| 1     | 3        | 0.14                | 0.011                         | 0.011                         | <0.15               | 0.000                         | 0.012                         |
| 1     | 4        | 0.10                | 0.008                         | 0.008                         | <0.15               | 0.000                         | 0.012                         |
| 1     | 5        | 0.15                | 0.012                         | 0.012                         | <0.15               | 0.000                         | 0.012                         |
| 1     | 6        | 0.09                | 0.007                         | 0.007                         | <0.15               | 0.000                         | 0.012                         |
| 1     | 7        | 0.08                | 0.007                         | 0.007                         | 0.19                | 0.015                         | 0.015                         |
| 1     | 8        | 0.20                | 0.016                         | 0.016                         | 0.24                | 0.019                         | 0.019                         |
| 2     | 1        | 0.11                | 0.009                         | 0.009                         | <0.15               | 0.000                         | 0.012                         |
| 2     | 2        | 0.08                | 0.006                         | 0.006                         | <0.15               | 0.000                         | 0.012                         |
| 2     | 3        | 0.09                | 0.007                         | 0.007                         | <0.15               | 0.000                         | 0.012                         |
| 2     | 4        | 0.10                | 0.008                         | 0.008                         | <0.15               | 0.000                         | 0.012                         |
| 2     | 5        | 0.16                | 0.013                         | 0.013                         | <0.15               | 0.000                         | 0.012                         |
| 2     | 6        | 0.09                | 0.007                         | 0.007                         | <0.15               | 0.000                         | 0.012                         |
| 2     | 7        | 0.10                | 0.008                         | 0.008                         | <0.15               | 0.000                         | 0.012                         |
| 2     | 8        | 0.24                | 0.019                         | 0.019                         | <0.15               | 0.000                         | 0.012                         |
| 3     | 1        | 0.10                | 0.008                         | 0.008                         | <0.15               | 0.000                         | 0.012                         |
| 3     | 2        | 0.10                | 0.008                         | 0.008                         | <0.15               | 0.000                         | 0.012                         |
| 3     | 3        | 0.11                | 0.009                         | 0.009                         | <0.15               | 0.000                         | 0.012                         |
| 3     | 4        | 0.11                | 0.009                         | 0.009                         | <0.15               | 0.000                         | 0.012                         |
| 3     | 5        | 0.23                | 0.019                         | 0.019                         | <0.15               | 0.000                         | 0.012                         |
| 3     | 6        | 0.11                | 0.009                         | 0.009                         | <0.15               | 0.000                         | 0.012                         |
| 3     | 7        | 0.10                | 0.008                         | 0.008                         | <0.15               | 0.000                         | 0.012                         |
| 3     | 8        | 0.24                | 0.019                         | 0.019                         | <0.15               | 0.000                         | 0.012                         |
| 4     | 1        | 0.08                | 0.006                         | 0.006                         | <0.15               | 0.000                         | 0.012                         |
| 4     | 2        | 0.09                | 0.007                         | 0.007                         | <0.15               | 0.000                         | 0.012                         |
| 4     | 3        | 0.08                | 0.006                         | 0.006                         | <0.15               | 0.000                         | 0.012                         |
| 4     | 4        | 0.08                | 0.006                         | 0.006                         | <0.15               | 0.000                         | 0.012                         |
| 4     | 5        | 0.31                | 0.025                         | 0.025                         | <0.15               | 0.000                         | 0.012                         |
| 4     | 6        | 0.09                | 0.007                         | 0.007                         | <0.15               | 0.000                         | 0.012                         |
| 4     | 7        | 0.09                | 0.007                         | 0.007                         | <0.15               | 0.000                         | 0.012                         |
| 4     | 8        | 0.19                | 0.015                         | 0.015                         | <0.15               | 0.000                         | 0.012                         |
| 5     | 1        | 0.10                | 0.008                         | 0.008                         | <0.15               | 0.000                         | 0.012                         |
| 5     | 2        | 0.09                | 0.007                         | 0.007                         | <0.15               | 0.000                         | 0.012                         |
| 5     | 3        | 0.12                | 0.010                         | 0.010                         | <0.15               | 0.000                         | 0.012                         |
| 5     | 4        | 0.10                | 0.008                         | 0.008                         | <0.15               | 0.000                         | 0.012                         |
| 5     | 5        | 0.12                | 0.010                         | 0.010                         | <0.15               | 0.000                         | 0.012                         |
| 5     | 6        | 0.09                | 0.007                         | 0.007                         | <0.15               | 0.000                         | 0.012                         |
| 5     | 7        | 0.09                | 0.007                         | 0.007                         | <0.15               | 0.000                         | 0.012                         |
| 5     | 8        | 0.20                | 0.016                         | 0.016                         | <0.15               | 0.000                         | 0.012                         |
|       |          |                     | Σ min                         | Σ max                         |                     | Σ min                         | Σ max                         |
| 1     |          |                     | 0.082                         | 0.082                         |                     | 0.034                         | 0.106                         |
| 2     |          |                     | 0.078                         | 0.078                         |                     | 0.000                         | 0.096                         |
| 3     |          |                     | 0.087                         | 0.087                         |                     | 0.000                         | 0.096                         |
| 4     |          |                     | 0.081                         | 0.081                         |                     | 0.000                         | 0.096                         |
| 5     |          |                     | 0.073                         | 0.073                         |                     | 0.000                         | 0.096                         |
| Mean  |          |                     | 0.080                         | 0.080                         |                     | 0.007                         | 0.098                         |
| SD    |          |                     | 0.005                         | 0.005                         |                     | 0.015                         | 0.005                         |

**Table E.** Continued Granodiorite.

| Stone | Fraction | LAB 1<br>Se<br>µg/l | min<br>r<br>mg/m <sup>2</sup> | max<br>r<br>mg/m <sup>2</sup> | LAB 2<br>Se<br>µg/l | min<br>r<br>mg/m <sup>2</sup> | max<br>r<br>mg/m <sup>2</sup> |
|-------|----------|---------------------|-------------------------------|-------------------------------|---------------------|-------------------------------|-------------------------------|
| 1     | 1        | 0.07                | 0.01                          | 0.01                          | <0.13               | 0.00                          | 0.01                          |
| 1     | 2        | 0.06                | 0.00                          | 0.00                          | <0.13               | 0.00                          | 0.01                          |
| 1     | 3        | 0.04                | 0.00                          | 0.00                          | <0.13               | 0.00                          | 0.01                          |
| 1     | 4        | 0.04                | 0.00                          | 0.00                          | <0.13               | 0.00                          | 0.01                          |
| 1     | 5        | 0.08                | 0.01                          | 0.01                          | <0.13               | 0.00                          | 0.01                          |
| 1     | 6        | 0.08                | 0.01                          | 0.01                          | <0.13               | 0.00                          | 0.01                          |
| 1     | 7        | 0.16                | 0.01                          | 0.01                          | <0.13               | 0.00                          | 0.01                          |
| 1     | 8        | 0.19                | 0.01                          | 0.01                          | <0.13               | 0.00                          | 0.01                          |
| 2     | 1        | 0.06                | 0.00                          | 0.00                          | <0.13               | 0.00                          | 0.01                          |
| 2     | 2        | 0.05                | 0.00                          | 0.00                          | <0.13               | 0.00                          | 0.01                          |
| 2     | 3        | 0.05                | 0.00                          | 0.00                          | <0.13               | 0.00                          | 0.01                          |
| 2     | 4        | 0.04                | 0.00                          | 0.00                          | <0.13               | 0.00                          | 0.01                          |
| 2     | 5        | 0.08                | 0.01                          | 0.01                          | <0.13               | 0.00                          | 0.01                          |
| 2     | 6        | 0.06                | 0.01                          | 0.01                          | <0.13               | 0.00                          | 0.01                          |
| 2     | 7        | 0.06                | 0.01                          | 0.01                          | <0.13               | 0.00                          | 0.01                          |
| 2     | 8        | 0.07                | 0.01                          | 0.01                          | <0.13               | 0.00                          | 0.01                          |
| 3     | 1        | 0.06                | 0.00                          | 0.00                          | <0.13               | 0.00                          | 0.01                          |
| 3     | 2        | <0.04               | 0.00                          | 0.00                          | <0.13               | 0.00                          | 0.01                          |
| 3     | 3        | 0.05                | 0.00                          | 0.00                          | <0.13               | 0.00                          | 0.01                          |
| 3     | 4        | <0.04               | 0.00                          | 0.00                          | <0.13               | 0.00                          | 0.01                          |
| 3     | 5        | 0.06                | 0.01                          | 0.01                          | <0.13               | 0.00                          | 0.01                          |
| 3     | 6        | 0.07                | 0.01                          | 0.01                          | <0.13               | 0.00                          | 0.01                          |
| 3     | 7        | 0.08                | 0.01                          | 0.01                          | <0.13               | 0.00                          | 0.01                          |
| 3     | 8        | 0.07                | 0.01                          | 0.01                          | <0.13               | 0.00                          | 0.01                          |
| 4     | 1        | 0.09                | 0.01                          | 0.01                          | <0.13               | 0.00                          | 0.01                          |
| 4     | 2        | 0.07                | 0.01                          | 0.01                          | <0.13               | 0.00                          | 0.01                          |
| 4     | 3        | 0.07                | 0.01                          | 0.01                          | <0.13               | 0.00                          | 0.01                          |
| 4     | 4        | 0.08                | 0.01                          | 0.01                          | <0.13               | 0.00                          | 0.01                          |
| 4     | 5        | 0.20                | 0.02                          | 0.02                          | <0.13               | 0.00                          | 0.01                          |
| 4     | 6        | 0.24                | 0.02                          | 0.02                          | <0.13               | 0.00                          | 0.01                          |
| 4     | 7        | 0.43                | 0.03                          | 0.03                          | <0.13               | 0.00                          | 0.01                          |
| 4     | 8        | 0.45                | 0.04                          | 0.04                          | <0.13               | 0.00                          | 0.01                          |
| 5     | 1        | 0.05                | 0.00                          | 0.00                          | <0.13               | 0.00                          | 0.01                          |
| 5     | 2        | <0.04               | 0.00                          | 0.00                          | <0.13               | 0.00                          | 0.01                          |
| 5     | 3        | <0.04               | 0.00                          | 0.00                          | <0.13               | 0.00                          | 0.01                          |
| 5     | 4        | 0.04                | 0.00                          | 0.00                          | <0.13               | 0.00                          | 0.01                          |
| 5     | 5        | 0.07                | 0.01                          | 0.01                          | <0.13               | 0.00                          | 0.01                          |
| 5     | 6        | 0.07                | 0.01                          | 0.01                          | <0.13               | 0.00                          | 0.01                          |
| 5     | 7        | 0.10                | 0.01                          | 0.01                          | <0.13               | 0.00                          | 0.01                          |
| 5     | 8        | 0.07                | 0.01                          | 0.01                          | <0.13               | 0.00                          | 0.01                          |
|       |          |                     | Σ min                         | Σ max                         |                     | Σ min                         | Σ max                         |
| 1     |          |                     | 0.06                          | 0.06                          |                     | 0.00                          | 0.08                          |
| 2     |          |                     | 0.04                          | 0.04                          |                     | 0.00                          | 0.08                          |
| 3     |          |                     | 0.03                          | 0.04                          |                     | 0.00                          | 0.08                          |
| 4     |          |                     | 0.13                          | 0.13                          |                     | 0.00                          | 0.08                          |
| 5     |          |                     | 0.03                          | 0.04                          |                     | 0.00                          | 0.08                          |
| Mean  |          |                     | 0.06                          | 0.06                          |                     | 0.00                          | 0.08                          |
| SD    |          |                     | 0.04                          | 0.04                          |                     | 0.00                          | 0.00                          |

**Table E.** Continued Granodiorite.

| Stone | Fraction | LAB 1<br>Sn<br>µg/l | min<br>r<br>mg/m <sup>2</sup> | max<br>r<br>mg/m <sup>2</sup> | LAB 2<br>Sn<br>µg/l | min<br>r<br>mg/m <sup>2</sup> | max<br>r<br>mg/m <sup>2</sup> |
|-------|----------|---------------------|-------------------------------|-------------------------------|---------------------|-------------------------------|-------------------------------|
| 1     | 1        | 0.062               | 0.005                         | 0.005                         | <0.06               | 0.000                         | 0.005                         |
| 1     | 2        | 0.029               | 0.002                         | 0.002                         | <0.06               | 0.000                         | 0.005                         |
| 1     | 3        | 0.085               | 0.007                         | 0.007                         | <0.06               | 0.000                         | 0.005                         |
| 1     | 4        | 0.046               | 0.004                         | 0.004                         | <0.06               | 0.000                         | 0.005                         |
| 1     | 5        | 0.063               | 0.005                         | 0.005                         | <0.06               | 0.000                         | 0.005                         |
| 1     | 6        | 0.040               | 0.003                         | 0.003                         | <0.06               | 0.000                         | 0.005                         |
| 1     | 7        | 0.033               | 0.003                         | 0.003                         | <0.06               | 0.000                         | 0.005                         |
| 1     | 8        | 0.033               | 0.003                         | 0.003                         | <0.06               | 0.000                         | 0.005                         |
| 2     | 1        | 0.103               | 0.008                         | 0.008                         | <0.06               | 0.000                         | 0.005                         |
| 2     | 2        | 0.049               | 0.004                         | 0.004                         | <0.06               | 0.000                         | 0.005                         |
| 2     | 3        | 0.313               | 0.025                         | 0.025                         | <0.06               | 0.000                         | 0.005                         |
| 2     | 4        | 0.080               | 0.006                         | 0.006                         | <0.06               | 0.000                         | 0.005                         |
| 2     | 5        | 0.128               | 0.010                         | 0.010                         | <0.06               | 0.000                         | 0.005                         |
| 2     | 6        | 0.090               | 0.007                         | 0.007                         | <0.06               | 0.000                         | 0.005                         |
| 2     | 7        | 0.074               | 0.006                         | 0.006                         | <0.06               | 0.000                         | 0.005                         |
| 2     | 8        | 0.353               | 0.028                         | 0.028                         | <0.06               | 0.000                         | 0.005                         |
| 3     | 1        | 0.080               | 0.006                         | 0.006                         | <0.06               | 0.000                         | 0.005                         |
| 3     | 2        | 0.049               | 0.004                         | 0.004                         | <0.06               | 0.000                         | 0.005                         |
| 3     | 3        | 0.370               | 0.030                         | 0.030                         | <0.06               | 0.000                         | 0.005                         |
| 3     | 4        | 0.090               | 0.007                         | 0.007                         | <0.06               | 0.000                         | 0.005                         |
| 3     | 5        | 0.195               | 0.016                         | 0.016                         | <0.06               | 0.000                         | 0.005                         |
| 3     | 6        | 0.100               | 0.008                         | 0.008                         | <0.06               | 0.000                         | 0.005                         |
| 3     | 7        | 0.110               | 0.009                         | 0.009                         | <0.06               | 0.000                         | 0.005                         |
| 3     | 8        | 0.060               | 0.005                         | 0.005                         | <0.06               | 0.000                         | 0.005                         |
| 4     | 1        | 0.054               | 0.004                         | 0.004                         | <0.06               | 0.000                         | 0.005                         |
| 4     | 2        | 0.087               | 0.007                         | 0.007                         | <0.06               | 0.000                         | 0.005                         |
| 4     | 3        | 0.119               | 0.010                         | 0.010                         | <0.06               | 0.000                         | 0.005                         |
| 4     | 4        | 0.066               | 0.005                         | 0.005                         | <0.06               | 0.000                         | 0.005                         |
| 4     | 5        | 0.272               | 0.022                         | 0.022                         | <0.06               | 0.000                         | 0.005                         |
| 4     | 6        | 0.061               | 0.005                         | 0.005                         | <0.06               | 0.000                         | 0.005                         |
| 4     | 7        | 0.061               | 0.005                         | 0.005                         | <0.06               | 0.000                         | 0.005                         |
| 4     | 8        | 0.059               | 0.005                         | 0.005                         | <0.06               | 0.000                         | 0.005                         |
| 5     | 1        | 0.064               | 0.005                         | 0.005                         | <0.06               | 0.000                         | 0.005                         |
| 5     | 2        | 0.098               | 0.008                         | 0.008                         | <0.06               | 0.000                         | 0.005                         |
| 5     | 3        | 0.236               | 0.019                         | 0.019                         | <0.06               | 0.000                         | 0.005                         |
| 5     | 4        | 0.102               | 0.008                         | 0.008                         | <0.06               | 0.000                         | 0.005                         |
| 5     | 5        | 0.093               | 0.007                         | 0.007                         | <0.06               | 0.000                         | 0.005                         |
| 5     | 6        | 0.135               | 0.011                         | 0.011                         | <0.06               | 0.000                         | 0.005                         |
| 5     | 7        | 0.158               | 0.013                         | 0.013                         | <0.06               | 0.000                         | 0.005                         |
| 5     | 8        | 0.057               | 0.005                         | 0.005                         | <0.06               | 0.000                         | 0.005                         |
|       |          |                     | Σ min                         | Σ max                         |                     | Σ min                         | Σ max                         |
| 1     |          |                     | 0.031                         | 0.031                         |                     | 0.000                         | 0.038                         |
| 2     |          |                     | 0.095                         | 0.095                         |                     | 0.000                         | 0.038                         |
| 3     |          |                     | 0.084                         | 0.084                         |                     | 0.000                         | 0.038                         |
| 4     |          |                     | 0.062                         | 0.062                         |                     | 0.000                         | 0.038                         |
| 5     |          |                     | 0.075                         | 0.075                         |                     | 0.000                         | 0.038                         |
| Mean  |          |                     | 0.070                         | 0.070                         |                     | 0.000                         | 0.038                         |
| SD    |          |                     | 0.025                         | 0.025                         |                     | 0.000                         | 0.000                         |

**Table E.** Continued Granodiorite.

| Stone | Fraction | LAB 1<br>Sr<br>µg/l | min<br>r<br>mg/m <sup>2</sup> | max<br>r<br>mg/m <sup>2</sup> | LAB 2<br>Sr<br>µg/l | min<br>r<br>mg/m <sup>2</sup> | max<br>r<br>mg/m <sup>2</sup> |
|-------|----------|---------------------|-------------------------------|-------------------------------|---------------------|-------------------------------|-------------------------------|
| 1     | 1        | 8.50                | 0.680                         | 0.680                         | <0.71               | 0.000                         | 0.057                         |
| 1     | 2        | 8.30                | 0.664                         | 0.664                         | <0.71               | 0.000                         | 0.057                         |
| 1     | 3        | 7.10                | 0.568                         | 0.568                         | <0.71               | 0.000                         | 0.057                         |
| 1     | 4        | 7.74                | 0.619                         | 0.619                         | <0.71               | 0.000                         | 0.057                         |
| 1     | 5        | 8.08                | 0.646                         | 0.646                         | 0.77                | 0.062                         | 0.062                         |
| 1     | 6        | 3.69                | 0.295                         | 0.295                         | 0.73                | 0.058                         | 0.058                         |
| 1     | 7        | 8.24                | 0.659                         | 0.659                         | 1.42                | 0.114                         | 0.114                         |
| 1     | 8        | 6.83                | 0.546                         | 0.546                         | 1.16                | 0.093                         | 0.093                         |
| 2     | 1        | 8.65                | 0.692                         | 0.692                         | <0.71               | 0.000                         | 0.057                         |
| 2     | 2        | 8.74                | 0.699                         | 0.699                         | <0.71               | 0.000                         | 0.057                         |
| 2     | 3        | 8.03                | 0.643                         | 0.643                         | <0.71               | 0.000                         | 0.057                         |
| 2     | 4        | 8.32                | 0.665                         | 0.665                         | <0.71               | 0.000                         | 0.057                         |
| 2     | 5        | 9.18                | 0.734                         | 0.734                         | <0.71               | 0.000                         | 0.057                         |
| 2     | 6        | 7.87                | 0.630                         | 0.630                         | 0.72                | 0.057                         | 0.057                         |
| 2     | 7        | 9.22                | 0.737                         | 0.737                         | 1.28                | 0.103                         | 0.103                         |
| 2     | 8        | 8.22                | 0.658                         | 0.658                         | 1.12                | 0.089                         | 0.089                         |
| 3     | 1        | 8.40                | 0.672                         | 0.672                         | <0.71               | 0.000                         | 0.057                         |
| 3     | 2        | 8.03                | 0.643                         | 0.643                         | <0.71               | 0.000                         | 0.057                         |
| 3     | 3        | 8.00                | 0.640                         | 0.640                         | <0.71               | 0.000                         | 0.057                         |
| 3     | 4        | 7.82                | 0.626                         | 0.626                         | <0.71               | 0.000                         | 0.057                         |
| 3     | 5        | 7.17                | 0.574                         | 0.574                         | <0.71               | 0.000                         | 0.057                         |
| 3     | 6        | 6.76                | 0.541                         | 0.541                         | <0.71               | 0.000                         | 0.057                         |
| 3     | 7        | 8.34                | 0.667                         | 0.667                         | 0.94                | 0.075                         | 0.075                         |
| 3     | 8        | 7.27                | 0.582                         | 0.582                         | 0.89                | 0.071                         | 0.071                         |
| 4     | 1        | 7.71                | 0.617                         | 0.617                         | 1.06                | 0.085                         | 0.085                         |
| 4     | 2        | 7.45                | 0.595                         | 0.595                         | <0.71               | 0.000                         | 0.057                         |
| 4     | 3        | 7.81                | 0.625                         | 0.625                         | <0.71               | 0.000                         | 0.057                         |
| 4     | 4        | 7.66                | 0.612                         | 0.612                         | <0.71               | 0.000                         | 0.057                         |
| 4     | 5        | 7.84                | 0.627                         | 0.627                         | 0.81                | 0.065                         | 0.065                         |
| 4     | 6        | 7.68                | 0.614                         | 0.614                         | 0.73                | 0.058                         | 0.058                         |
| 4     | 7        | 10.36               | 0.829                         | 0.829                         | 1.44                | 0.115                         | 0.115                         |
| 4     | 8        | 12.25               | 0.980                         | 0.980                         | 1.14                | 0.091                         | 0.091                         |
| 5     | 1        | 8.50                | 0.680                         | 0.680                         | <0.71               | 0.000                         | 0.057                         |
| 5     | 2        | 8.04                | 0.643                         | 0.643                         | <0.71               | 0.000                         | 0.057                         |
| 5     | 3        | 6.97                | 0.558                         | 0.558                         | <0.71               | 0.000                         | 0.057                         |
| 5     | 4        | 8.15                | 0.652                         | 0.652                         | <0.71               | 0.000                         | 0.057                         |
| 5     | 5        | 8.36                | 0.669                         | 0.669                         | 0.99                | 0.079                         | 0.079                         |
| 5     | 6        | 8.36                | 0.669                         | 0.669                         | 1.01                | 0.081                         | 0.081                         |
| 5     | 7        | 9.01                | 0.721                         | 0.721                         | 2.17                | 0.174                         | 0.174                         |
| 5     | 8        | 7.19                | 0.575                         | 0.575                         | 2.18                | 0.174                         | 0.174                         |
|       |          |                     | Σ min                         | Σ max                         |                     | Σ min                         | Σ max                         |
| 1     |          |                     | 4.678                         | 4.678                         |                     | 0.327                         | 0.554                         |
| 2     |          |                     | 5.459                         | 5.459                         |                     | 0.249                         | 0.533                         |
| 3     |          |                     | 4.943                         | 4.943                         |                     | 0.146                         | 0.488                         |
| 4     |          |                     | 5.499                         | 5.499                         |                     | 0.413                         | 0.584                         |
| 5     |          |                     | 5.167                         | 5.167                         |                     | 0.508                         | 0.736                         |
| Mean  |          |                     | 5.149                         | 5.149                         |                     | 0.329                         | 0.579                         |
| SD    |          |                     | 0.347                         | 0.347                         |                     | 0.141                         | 0.094                         |

**Table E.** Continued Granodiorite.

| Stone | Fraction | LAB 1<br>U<br>µg/l | min<br>r<br>mg/m <sup>2</sup> | max<br>r<br>mg/m <sup>2</sup> | LAB 2<br>U<br>µg/l | min<br>r<br>mg/m <sup>2</sup> | max<br>r<br>mg/m <sup>2</sup> |
|-------|----------|--------------------|-------------------------------|-------------------------------|--------------------|-------------------------------|-------------------------------|
| 1     | 1        | 0.071              | 0.006                         | 0.006                         | 0.081              | 0.006                         | 0.006                         |
| 1     | 2        | 0.061              | 0.005                         | 0.005                         | 0.045              | 0.004                         | 0.004                         |
| 1     | 3        | 0.050              | 0.004                         | 0.004                         | 0.046              | 0.004                         | 0.004                         |
| 1     | 4        | 0.058              | 0.005                         | 0.005                         | 0.049              | 0.004                         | 0.004                         |
| 1     | 5        | 0.088              | 0.007                         | 0.007                         | 0.097              | 0.008                         | 0.008                         |
| 1     | 6        | 0.139              | 0.011                         | 0.011                         | 0.112              | 0.009                         | 0.009                         |
| 1     | 7        | 0.097              | 0.008                         | 0.008                         | 0.284              | 0.023                         | 0.023                         |
| 1     | 8        | 0.091              | 0.007                         | 0.007                         | 0.237              | 0.019                         | 0.019                         |
| 2     | 1        | 0.083              | 0.007                         | 0.007                         | 0.061              | 0.005                         | 0.005                         |
| 2     | 2        | 0.054              | 0.004                         | 0.004                         | 0.034              | 0.003                         | 0.003                         |
| 2     | 3        | 0.055              | 0.004                         | 0.004                         | <0.03              | 0.000                         | 0.002                         |
| 2     | 4        | 0.042              | 0.003                         | 0.003                         | <0.03              | 0.000                         | 0.002                         |
| 2     | 5        | 0.059              | 0.005                         | 0.005                         | 0.049              | 0.004                         | 0.004                         |
| 2     | 6        | 0.096              | 0.008                         | 0.008                         | 0.051              | 0.004                         | 0.004                         |
| 2     | 7        | 0.089              | 0.007                         | 0.007                         | 0.122              | 0.010                         | 0.010                         |
| 2     | 8        | 0.109              | 0.009                         | 0.009                         | 0.126              | 0.010                         | 0.010                         |
| 3     | 1        | 0.114              | 0.009                         | 0.009                         | 0.050              | 0.004                         | 0.004                         |
| 3     | 2        | 0.111              | 0.009                         | 0.009                         | <0.03              | 0.000                         | 0.002                         |
| 3     | 3        | 0.097              | 0.008                         | 0.008                         | <0.03              | 0.000                         | 0.002                         |
| 3     | 4        | 0.081              | 0.006                         | 0.006                         | <0.03              | 0.000                         | 0.002                         |
| 3     | 5        | 0.117              | 0.009                         | 0.009                         | 0.051              | 0.004                         | 0.004                         |
| 3     | 6        | 0.177              | 0.014                         | 0.014                         | 0.065              | 0.005                         | 0.005                         |
| 3     | 7        | 0.144              | 0.011                         | 0.011                         | 0.111              | 0.009                         | 0.009                         |
| 3     | 8        | 0.189              | 0.015                         | 0.015                         | 0.110              | 0.009                         | 0.009                         |
| 4     | 1        | 0.043              | 0.003                         | 0.003                         | 0.355              | 0.028                         | 0.028                         |
| 4     | 2        | 0.068              | 0.005                         | 0.005                         | 0.191              | 0.015                         | 0.015                         |
| 4     | 3        | 0.115              | 0.009                         | 0.009                         | 0.122              | 0.010                         | 0.010                         |
| 4     | 4        | 0.088              | 0.007                         | 0.007                         | 0.091              | 0.007                         | 0.007                         |
| 4     | 5        | 0.392              | 0.031                         | 0.031                         | 0.150              | 0.012                         | 0.012                         |
| 4     | 6        | 0.209              | 0.017                         | 0.017                         | 0.129              | 0.010                         | 0.010                         |
| 4     | 7        | 0.163              | 0.013                         | 0.013                         | 0.240              | 0.019                         | 0.019                         |
| 4     | 8        | 0.241              | 0.019                         | 0.019                         | 0.187              | 0.015                         | 0.015                         |
| 5     | 1        | 0.048              | 0.004                         | 0.004                         | 0.223              | 0.018                         | 0.018                         |
| 5     | 2        | 0.046              | 0.004                         | 0.004                         | 0.130              | 0.010                         | 0.010                         |
| 5     | 3        | 0.038              | 0.003                         | 0.003                         | 0.091              | 0.007                         | 0.007                         |
| 5     | 4        | <0.04              | 0.0                           | 0.003                         | 0.063              | 0.005                         | 0.005                         |
| 5     | 5        | 0.047              | 0.004                         | 0.004                         | 0.119              | 0.010                         | 0.010                         |
| 5     | 6        | 0.074              | 0.006                         | 0.006                         | 0.092              | 0.007                         | 0.007                         |
| 5     | 7        | 0.057              | 0.005                         | 0.005                         | 0.190              | 0.015                         | 0.015                         |
| 5     | 8        | 0.078              | 0.006                         | 0.006                         | 0.158              | 0.013                         | 0.013                         |
|       |          |                    | Σ min                         | Σ max                         |                    | Σ min                         | Σ max                         |
| 1     |          |                    | 0.052                         | 0.052                         |                    | 0.076                         | 0.076                         |
| 2     |          |                    | 0.047                         | 0.047                         |                    | 0.035                         | 0.040                         |
| 3     |          |                    | 0.082                         | 0.082                         |                    | 0.031                         | 0.038                         |
| 4     |          |                    | 0.106                         | 0.106                         |                    | 0.117                         | 0.117                         |
| 5     |          |                    | 0.031                         | 0.034                         |                    | 0.085                         | 0.085                         |
| Mean  |          |                    | 0.064                         | 0.064                         |                    | 0.069                         | 0.071                         |
| SD    |          |                    | 0.030                         | 0.029                         |                    | 0.036                         | 0.033                         |

**Table E.** Continued Granodiorite.

| Stone | Fraction | LAB 1<br>V<br>µg/l | min<br>r<br>mg/m <sup>2</sup> | max<br>r<br>mg/m <sup>2</sup> | LAB 2<br>V<br>µg/l | min<br>r<br>mg/m <sup>2</sup> | max<br>r<br>mg/m <sup>2</sup> |
|-------|----------|--------------------|-------------------------------|-------------------------------|--------------------|-------------------------------|-------------------------------|
| 1     | 1        | 0.081              | 0.007                         | 0.007                         | 0.064              | 0.005                         | 0.005                         |
| 1     | 2        | 0.074              | 0.006                         | 0.006                         | 0.038              | 0.003                         | 0.003                         |
| 1     | 3        | 0.062              | 0.005                         | 0.005                         | <0.03              | 0.000                         | 0.002                         |
| 1     | 4        | 0.055              | 0.004                         | 0.004                         | <0.03              | 0.000                         | 0.002                         |
| 1     | 5        | 0.080              | 0.006                         | 0.006                         | <0.03              | 0.000                         | 0.002                         |
| 1     | 6        | 0.073              | 0.006                         | 0.006                         | <0.03              | 0.000                         | 0.002                         |
| 1     | 7        | 0.078              | 0.006                         | 0.006                         | 0.042              | 0.000                         | 0.003                         |
| 1     | 8        | 0.065              | 0.005                         | 0.005                         | 0.034              | 0.000                         | 0.003                         |
| 2     | 1        | 0.066              | 0.005                         | 0.005                         | 0.045              | 0.004                         | 0.004                         |
| 2     | 2        | 0.049              | 0.004                         | 0.004                         | 0.038              | 0.003                         | 0.003                         |
| 2     | 3        | 0.043              | 0.003                         | 0.003                         | <0.03              | 0.000                         | 0.002                         |
| 2     | 4        | 0.038              | 0.003                         | 0.003                         | <0.03              | 0.000                         | 0.002                         |
| 2     | 5        | 0.058              | 0.005                         | 0.005                         | <0.03              | 0.000                         | 0.002                         |
| 2     | 6        | 0.045              | 0.004                         | 0.004                         | <0.03              | 0.000                         | 0.002                         |
| 2     | 7        | 0.075              | 0.006                         | 0.006                         | 0.053              | 0.000                         | 0.004                         |
| 2     | 8        | 0.072              | 0.006                         | 0.006                         | 0.036              | 0.000                         | 0.003                         |
| 3     | 1        | 0.049              | 0.004                         | 0.004                         | 0.132              | 0.011                         | 0.011                         |
| 3     | 2        | 0.046              | 0.004                         | 0.004                         | 0.111              | 0.009                         | 0.009                         |
| 3     | 3        | 0.035              | 0.003                         | 0.003                         | 0.032              | 0.003                         | 0.003                         |
| 3     | 4        | 0.029              | 0.002                         | 0.002                         | <0.03              | 0.000                         | 0.002                         |
| 3     | 5        | 0.038              | 0.003                         | 0.003                         | <0.03              | 0.000                         | 0.002                         |
| 3     | 6        | 0.029              | 0.002                         | 0.002                         | <0.03              | 0.000                         | 0.002                         |
| 3     | 7        | 0.040              | 0.003                         | 0.003                         | 0.062              | 0.000                         | 0.005                         |
| 3     | 8        | 0.029              | 0.002                         | 0.002                         | 0.060              | 0.005                         | 0.005                         |
| 4     | 1        | 0.025              | 0.002                         | 0.002                         | 0.049              | 0.004                         | 0.004                         |
| 4     | 2        | 0.023              | 0.002                         | 0.002                         | <0.03              | 0.000                         | 0.002                         |
| 4     | 3        | <0.02              | 0.000                         | 0.002                         | <0.03              | 0.000                         | 0.002                         |
| 4     | 4        | <0.02              | 0.000                         | 0.002                         | <0.03              | 0.000                         | 0.002                         |
| 4     | 5        | 0.032              | 0.003                         | 0.003                         | <0.03              | 0.000                         | 0.002                         |
| 4     | 6        | 0.031              | 0.003                         | 0.003                         | <0.03              | 0.000                         | 0.002                         |
| 4     | 7        | 0.040              | 0.003                         | 0.003                         | <0.03              | 0.000                         | 0.002                         |
| 4     | 8        | 0.050              | 0.004                         | 0.004                         | <0.03              | 0.000                         | 0.002                         |
| 5     | 1        | 0.059              | 0.005                         | 0.005                         | 0.063              | 0.005                         | 0.005                         |
| 5     | 2        | 0.056              | 0.004                         | 0.004                         | 0.045              | 0.000                         | 0.004                         |
| 5     | 3        | 0.046              | 0.004                         | 0.004                         | 0.038              | 0.000                         | 0.003                         |
| 5     | 4        | 0.034              | 0.003                         | 0.003                         | 0.033              | 0.003                         | 0.003                         |
| 5     | 5        | 0.050              | 0.004                         | 0.004                         | 0.047              | 0.004                         | 0.004                         |
| 5     | 6        | 0.040              | 0.003                         | 0.003                         | 0.040              | 0.000                         | 0.003                         |
| 5     | 7        | 0.055              | 0.004                         | 0.004                         | 0.056              | 0.000                         | 0.004                         |
| 5     | 8        | 0.050              | 0.004                         | 0.004                         | 0.040              | 0.000                         | 0.003                         |
|       |          |                    | Σ min                         | Σ max                         |                    | Σ min                         | Σ max                         |
| 1     |          |                    | 0.045                         | 0.045                         |                    | 0.008                         | 0.024                         |
| 2     |          |                    | 0.036                         | 0.036                         |                    | 0.007                         | 0.023                         |
| 3     |          |                    | 0.023                         | 0.023                         |                    | 0.027                         | 0.039                         |
| 4     |          |                    | 0.016                         | 0.019                         |                    | 0.004                         | 0.021                         |
| 5     |          |                    | 0.031                         | 0.031                         |                    | 0.011                         | 0.029                         |
| Mean  |          |                    | 0.030                         | 0.031                         |                    | 0.011                         | 0.027                         |
| SD    |          |                    | 0.011                         | 0.010                         |                    | 0.009                         | 0.007                         |

**Table E.** Continued Granodiorite.

| Stone | Fraction | LAB 1<br>Zn<br>µg/l | min<br>r<br>mg/m <sup>2</sup> | max<br>r<br>mg/m <sup>2</sup> | LAB 2<br>Zn<br>µg/l | min<br>r<br>mg/m <sup>2</sup> | max<br>r<br>mg/m <sup>2</sup> |
|-------|----------|---------------------|-------------------------------|-------------------------------|---------------------|-------------------------------|-------------------------------|
| 1     | 1        | 462                 | 36.98                         | 36.98                         | 0.95                | 0.076                         | 0.076                         |
| 1     | 2        | 468                 | 37.48                         | 37.48                         | 0.54                | 0.043                         | 0.043                         |
| 1     | 3        | 240                 | 19.18                         | 19.18                         | 0.67                | 0.053                         | 0.053                         |
| 1     | 4        | 281                 | 22.47                         | 22.47                         | 0.41                | 0.032                         | 0.032                         |
| 1     | 5        | 261                 | 20.91                         | 20.91                         | 0.29                | 0.024                         | 0.024                         |
| 1     | 6        | 249                 | 19.89                         | 19.89                         | 0.24                | 0.019                         | 0.019                         |
| 1     | 7        | 387                 | 30.96                         | 30.96                         | 0.27                | 0.021                         | 0.021                         |
| 1     | 8        | 254                 | 20.35                         | 20.35                         | 0.27                | 0.021                         | 0.021                         |
| 2     | 1        | 422                 | 33.74                         | 33.74                         | 0.63                | 0.051                         | 0.051                         |
| 2     | 2        | 311                 | 24.89                         | 24.89                         | 0.57                | 0.046                         | 0.046                         |
| 2     | 3        | 436                 | 34.88                         | 34.88                         | 0.54                | 0.043                         | 0.043                         |
| 2     | 4        | 319                 | 25.50                         | 25.50                         | 0.32                | 0.026                         | 0.026                         |
| 2     | 5        | 465                 | 37.22                         | 37.22                         | 0.28                | 0.022                         | 0.022                         |
| 2     | 6        | 311                 | 24.85                         | 24.85                         | 0.41                | 0.033                         | 0.033                         |
| 2     | 7        | 419                 | 33.51                         | 33.51                         | 0.29                | 0.023                         | 0.023                         |
| 2     | 8        | 282                 | 22.58                         | 22.58                         | 0.42                | 0.033                         | 0.033                         |
| 3     | 1        | 276                 | 22.05                         | 22.05                         | 0.77                | 0.061                         | 0.061                         |
| 3     | 2        | 456                 | 36.47                         | 36.47                         | 0.40                | 0.032                         | 0.032                         |
| 3     | 3        | 452                 | 36.13                         | 36.13                         | 0.76                | 0.061                         | 0.061                         |
| 3     | 4        | 262                 | 20.97                         | 20.97                         | 1.17                | 0.093                         | 0.093                         |
| 3     | 5        | 225                 | 17.98                         | 17.98                         | 0.73                | 0.058                         | 0.058                         |
| 3     | 6        | 255                 | 20.36                         | 20.36                         | 0.97                | 0.078                         | 0.078                         |
| 3     | 7        | 293                 | 23.40                         | 23.40                         | 0.89                | 0.071                         | 0.071                         |
| 3     | 8        | 251                 | 20.05                         | 20.05                         | 1.02                | 0.082                         | 0.082                         |
| 4     | 1        | 437                 | 34.93                         | 34.93                         | 5.64                | 0.451                         | 0.451                         |
| 4     | 2        | 440                 | 35.19                         | 35.19                         | 0.78                | 0.063                         | 0.063                         |
| 4     | 3        | 412                 | 32.94                         | 32.94                         | 0.87                | 0.070                         | 0.070                         |
| 4     | 4        | 413                 | 33.04                         | 33.04                         | 0.43                | 0.034                         | 0.034                         |
| 4     | 5        | 264                 | 21.08                         | 21.08                         | 0.36                | 0.029                         | 0.029                         |
| 4     | 6        | 289                 | 23.14                         | 23.14                         | 0.40                | 0.032                         | 0.032                         |
| 4     | 7        | 304                 | 24.28                         | 24.28                         | 0.64                | 0.051                         | 0.051                         |
| 4     | 8        | 690                 | 55.19                         | 55.19                         | 0.46                | 0.037                         | 0.037                         |
| 5     | 1        | 305                 | 24.38                         | 24.38                         | 0.54                | 0.043                         | 0.043                         |
| 5     | 2        | 299                 | 23.93                         | 23.93                         | 0.31                | 0.025                         | 0.025                         |
| 5     | 3        | 225                 | 18.03                         | 18.03                         | 0.34                | 0.027                         | 0.027                         |
| 5     | 4        | 297                 | 23.79                         | 23.79                         | 0.18                | 0.014                         | 0.014                         |
| 5     | 5        | 303                 | 24.27                         | 24.27                         | 0.15                | 0.012                         | 0.012                         |
| 5     | 6        | 444                 | 35.56                         | 35.56                         | 0.24                | 0.019                         | 0.019                         |
| 5     | 7        | 295                 | 23.57                         | 23.57                         | 0.15                | 0.012                         | 0.012                         |
| 5     | 8        | 276                 | 22.05                         | 22.05                         | 0.23                | 0.019                         | 0.019                         |
|       |          |                     | Σ min                         | Σ max                         |                     | Σ min                         | Σ max                         |
| 1     |          |                     | 208.2                         | 208.2                         |                     | 0.291                         | 0.291                         |
| 2     |          |                     | 237.2                         | 237.2                         |                     | 0.277                         | 0.277                         |
| 3     |          |                     | 197.4                         | 197.4                         |                     | 0.537                         | 0.537                         |
| 4     |          |                     | 259.8                         | 259.8                         |                     | 0.766                         | 0.766                         |
| 5     |          |                     | 195.6                         | 195.6                         |                     | 0.171                         | 0.171                         |
| Mean  |          |                     | 219.6                         | 219.6                         |                     | 0.408                         | 0.408                         |
| SD    |          |                     | 27.95                         | 27.95                         |                     | 0.241                         | 0.241                         |

**Table F.** DSLT results Granite (LAB 1 DSLT contract laboratory, LAB 2 DSLT BfG)

| Stone | Fraction | LAB 1<br>Al<br>µg/l | min<br>r<br>mg/m <sup>2</sup> | max<br>r<br>mg/m <sup>2</sup> | LAB 2<br>Al<br>µg/l | min<br>r<br>mg/m <sup>2</sup> | max<br>r<br>mg/m <sup>2</sup> |
|-------|----------|---------------------|-------------------------------|-------------------------------|---------------------|-------------------------------|-------------------------------|
| 1     | 1        | <40.8               | 0.0                           | 3.263                         | <6                  | 0.00                          | 0.48                          |
| 1     | 2        | <40.8               | 0.0                           | 3.263                         | <6                  | 0.00                          | 0.48                          |
| 1     | 3        | <40.8               | 0.0                           | 3.263                         | <6                  | 0.00                          | 0.48                          |
| 1     | 4        | <40.8               | 0.0                           | 3.263                         | <6                  | 0.00                          | 0.48                          |
| 1     | 5        | <40.8               | 0.0                           | 3.263                         | <6                  | 0.00                          | 0.48                          |
| 1     | 6        | <40.8               | 0.0                           | 3.263                         | <6                  | 0.00                          | 0.48                          |
| 1     | 7        | <40.8               | 0.0                           | 3.263                         | <6                  | 0.00                          | 0.48                          |
| 1     | 8        | <40.8               | 0.0                           | 3.263                         | <6                  | 0.00                          | 0.48                          |
| 2     | 1        | <40.8               | 0.0                           | 3.264                         | 6.64                | 0.53                          | 0.53                          |
| 2     | 2        | <40.8               | 0.0                           | 3.264                         | 10.65               | 0.85                          | 0.85                          |
| 2     | 3        | <40.8               | 0.0                           | 3.264                         | 6.82                | 0.54                          | 0.54                          |
| 2     | 4        | <40.8               | 0.0                           | 3.264                         | 7.63                | 0.61                          | 0.61                          |
| 2     | 5        | <40.8               | 0.0                           | 3.264                         | 19.50               | 1.56                          | 1.56                          |
| 2     | 6        | <40.8               | 0.0                           | 3.264                         | 14.64               | 1.17                          | 1.17                          |
| 2     | 7        | <40.8               | 0.0                           | 3.264                         | 17.73               | 1.42                          | 1.42                          |
| 2     | 8        | <40.8               | 0.0                           | 3.264                         | 12.57               | 1.00                          | 1.00                          |
| 3     | 1        | <40.8               | 0.0                           | 3.264                         | <6                  | 0.00                          | 0.48                          |
| 3     | 2        | <40.8               | 0.0                           | 3.264                         | <6                  | 0.00                          | 0.48                          |
| 3     | 3        | <40.8               | 0.0                           | 3.264                         | <6                  | 0.00                          | 0.48                          |
| 3     | 4        | <40.8               | 0.0                           | 3.264                         | <6                  | 0.00                          | 0.48                          |
| 3     | 5        | <40.8               | 0.0                           | 3.264                         | <6                  | 0.00                          | 0.48                          |
| 3     | 6        | <40.8               | 0.0                           | 3.264                         | <6                  | 0.00                          | 0.48                          |
| 3     | 7        | <40.8               | 0.0                           | 3.264                         | <6                  | 0.00                          | 0.48                          |
| 3     | 8        | <40.8               | 0.0                           | 3.264                         | <6                  | 0.00                          | 0.48                          |
| 4     | 1        | <40.8               | 0.0                           | 3.264                         | 7.60                | 0.61                          | 0.61                          |
| 4     | 2        | <40.8               | 0.0                           | 3.264                         | 10.23               | 0.82                          | 0.82                          |
| 4     | 3        | <40.8               | 0.0                           | 3.264                         | 8.18                | 0.65                          | 0.65                          |
| 4     | 4        | <40.8               | 0.0                           | 3.264                         | 8.56                | 0.68                          | 0.68                          |
| 4     | 5        | <40.8               | 0.0                           | 3.264                         | 21.21               | 1.70                          | 1.70                          |
| 4     | 6        | <40.8               | 0.0                           | 3.264                         | 15.76               | 1.26                          | 1.26                          |
| 4     | 7        | <40.8               | 0.0                           | 3.264                         | 16.83               | 1.35                          | 1.35                          |
| 4     | 8        | <40.8               | 0.0                           | 3.264                         | 14.65               | 1.17                          | 1.17                          |
| 5     | 1        | <40.8               | 0.0                           | 3.264                         | <6                  | 0.00                          | 0.48                          |
| 5     | 2        | <40.8               | 0.0                           | 3.264                         | <6                  | 0.00                          | 0.48                          |
| 5     | 3        | <40.8               | 0.0                           | 3.264                         | <6                  | 0.00                          | 0.48                          |
| 5     | 4        | <40.8               | 0.0                           | 3.264                         | <6                  | 0.00                          | 0.48                          |
| 5     | 5        | <40.8               | 0.0                           | 3.264                         | <6                  | 0.00                          | 0.48                          |
| 5     | 6        | <40.8               | 0.0                           | 3.264                         | <6                  | 0.00                          | 0.48                          |
| 5     | 7        | <40.8               | 0.0                           | 3.264                         | <6                  | 0.00                          | 0.48                          |
| 5     | 8        | <40.8               | 0.0                           | 3.264                         | <6                  | 0.00                          | 0.48                          |
|       |          |                     | Σ min                         | Σ max                         |                     | Σ min                         | Σ max                         |
| 1     |          |                     | 0.00                          | 26.11                         |                     | 0.00                          | 3.84                          |
| 2     |          |                     | 0.00                          | 26.11                         |                     | 7.69                          | 7.69                          |
| 3     |          |                     | 0.00                          | 26.11                         |                     | 0.00                          | 3.84                          |
| 4     |          |                     | 0.00                          | 26.11                         |                     | 8.23                          | 8.23                          |
| 5     |          |                     | 0.00                          | 26.11                         |                     | 0.00                          | 3.84                          |
| Mean  |          |                     | 0.00                          | 26.11                         |                     | 3.18                          | 5.49                          |
| SD    |          |                     | 0.00                          | 0.00                          |                     | 4.37                          | 2.27                          |

**Table F.** Continued Granite.

| Stone | Fraction | LAB 1<br>As<br>µg/l | min<br>r<br>mg/m <sup>2</sup> | max<br>r<br>mg/m <sup>2</sup> | LAB 2<br>As<br>µg/l | min<br>r<br>mg/m <sup>2</sup> | max<br>r<br>mg/m <sup>2</sup> |
|-------|----------|---------------------|-------------------------------|-------------------------------|---------------------|-------------------------------|-------------------------------|
| 1     | 1        | 0.30                | 0.024                         | 0.024                         | 0.10                | 0.008                         | 0.008                         |
| 1     | 2        | 0.25                | 0.020                         | 0.020                         | 0.12                | 0.009                         | 0.009                         |
| 1     | 3        | 0.22                | 0.018                         | 0.018                         | 0.11                | 0.009                         | 0.009                         |
| 1     | 4        | 0.18                | 0.014                         | 0.014                         | 0.13                | 0.011                         | 0.011                         |
| 1     | 5        | 0.25                | 0.020                         | 0.020                         | 0.23                | 0.018                         | 0.018                         |
| 1     | 6        | 0.37                | 0.029                         | 0.029                         | 0.29                | 0.024                         | 0.024                         |
| 1     | 7        | 1.42                | 0.113                         | 0.113                         | 0.42                | 0.034                         | 0.034                         |
| 1     | 8        | 0.77                | 0.061                         | 0.061                         | 0.43                | 0.035                         | 0.035                         |
| 2     | 1        | 0.21                | 0.017                         | 0.017                         | 0.16                | 0.013                         | 0.013                         |
| 2     | 2        | 0.23                | 0.018                         | 0.018                         | 0.18                | 0.014                         | 0.014                         |
| 2     | 3        | 0.33                | 0.026                         | 0.026                         | 0.16                | 0.012                         | 0.012                         |
| 2     | 4        | 0.30                | 0.024                         | 0.024                         | 0.15                | 0.012                         | 0.012                         |
| 2     | 5        | 0.58                | 0.046                         | 0.046                         | 0.25                | 0.020                         | 0.020                         |
| 2     | 6        | 0.74                | 0.059                         | 0.059                         | 0.24                | 0.019                         | 0.019                         |
| 2     | 7        | 2.42                | 0.194                         | 0.194                         | 0.26                | 0.021                         | 0.021                         |
| 2     | 8        | 2.22                | 0.178                         | 0.178                         | 0.22                | 0.017                         | 0.017                         |
| 3     | 1        | 0.16                | 0.013                         | 0.013                         | 0.06                | 0.005                         | 0.005                         |
| 3     | 2        | 0.14                | 0.011                         | 0.011                         | 0.06                | 0.004                         | 0.004                         |
| 3     | 3        | 0.15                | 0.012                         | 0.012                         | 0.06                | 0.004                         | 0.004                         |
| 3     | 4        | 0.14                | 0.011                         | 0.011                         | 0.07                | 0.005                         | 0.005                         |
| 3     | 5        | 0.22                | 0.018                         | 0.018                         | 0.09                | 0.007                         | 0.007                         |
| 3     | 6        | 0.27                | 0.022                         | 0.022                         | 0.10                | 0.008                         | 0.008                         |
| 3     | 7        | 0.77                | 0.062                         | 0.062                         | 0.16                | 0.013                         | 0.013                         |
| 3     | 8        | 0.36                | 0.029                         | 0.029                         | 0.23                | 0.019                         | 0.019                         |
| 4     | 1        | 0.18                | 0.015                         | 0.015                         | 0.39                | 0.031                         | 0.031                         |
| 4     | 2        | 0.14                | 0.011                         | 0.011                         | 0.86                | 0.069                         | 0.069                         |
| 4     | 3        | 0.13                | 0.010                         | 0.010                         | 0.81                | 0.065                         | 0.065                         |
| 4     | 4        | 0.12                | 0.010                         | 0.010                         | 0.87                | 0.070                         | 0.070                         |
| 4     | 5        | 0.22                | 0.017                         | 0.017                         | 1.40                | 0.112                         | 0.112                         |
| 4     | 6        | 0.30                | 0.024                         | 0.024                         | 1.47                | 0.118                         | 0.118                         |
| 4     | 7        | 1.10                | 0.088                         | 0.088                         | 1.89                | 0.151                         | 0.151                         |
| 4     | 8        | 0.59                | 0.047                         | 0.047                         | 1.74                | 0.139                         | 0.139                         |
| 5     | 1        | 0.19                | 0.015                         | 0.015                         | 1.27                | 0.101                         | 0.101                         |
| 5     | 2        | 0.13                | 0.010                         | 0.010                         | 0.81                | 0.064                         | 0.064                         |
| 5     | 3        | 0.14                | 0.011                         | 0.011                         | 0.69                | 0.055                         | 0.055                         |
| 5     | 4        | 0.10                | 0.008                         | 0.008                         | 0.82                | 0.066                         | 0.066                         |
| 5     | 5        | 0.15                | 0.012                         | 0.012                         | 1.20                | 0.096                         | 0.096                         |
| 5     | 6        | 0.19                | 0.015                         | 0.015                         | 1.41                | 0.113                         | 0.113                         |
| 5     | 7        | 0.51                | 0.040                         | 0.040                         | 1.83                | 0.146                         | 0.146                         |
| 5     | 8        | 0.44                | 0.035                         | 0.035                         | 2.15                | 0.172                         | 0.172                         |
|       |          |                     | Σ min                         | Σ max                         |                     | Σ min                         | Σ max                         |
| 1     |          |                     | 0.30                          | 0.30                          |                     | 0.147                         | 0.147                         |
| 2     |          |                     | 0.56                          | 0.56                          |                     | 0.129                         | 0.129                         |
| 3     |          |                     | 0.18                          | 0.18                          |                     | 0.066                         | 0.066                         |
| 4     |          |                     | 0.22                          | 0.22                          |                     | 0.754                         | 0.754                         |
| 5     |          |                     | 0.15                          | 0.15                          |                     | 0.814                         | 0.814                         |
| Mean  |          |                     | 0.282                         | 0.282                         |                     | 0.38                          | 0.38                          |
| SD    |          |                     | 0.167                         | 0.167                         |                     | 0.37                          | 0.37                          |

**Table F.** Continued Granite.

| Stone | Fraction | LAB 1<br>Ba<br>µg/l | min<br>r<br>mg/m <sup>2</sup> | max<br>r<br>mg/m <sup>2</sup> | LAB 2<br>Ba<br>µg/l | min<br>r<br>mg/m <sup>2</sup> | max<br>r<br>mg/m <sup>2</sup> |
|-------|----------|---------------------|-------------------------------|-------------------------------|---------------------|-------------------------------|-------------------------------|
| 1     | 1        | 350                 | 28.02                         | 28.02                         | 0.38                | 0.031                         | 0.031                         |
| 1     | 2        | 429                 | 34.29                         | 34.29                         | 0.54                | 0.043                         | 0.043                         |
| 1     | 3        | 482                 | 38.51                         | 38.51                         | 0.15                | 0.012                         | 0.012                         |
| 1     | 4        | 434                 | 34.70                         | 34.70                         | 0.12                | 0.009                         | 0.009                         |
| 1     | 5        | 447                 | 35.76                         | 35.76                         | 0.28                | 0.022                         | 0.022                         |
| 1     | 6        | 443                 | 35.42                         | 35.42                         | 0.17                | 0.013                         | 0.013                         |
| 1     | 7        | 355                 | 28.43                         | 28.43                         | 0.20                | 0.016                         | 0.016                         |
| 1     | 8        | 430                 | 34.38                         | 34.38                         | 0.13                | 0.011                         | 0.011                         |
| 2     | 1        | 431                 | 34.46                         | 34.46                         | 0.26                | 0.021                         | 0.021                         |
| 2     | 2        | 415                 | 33.16                         | 33.16                         | 0.77                | 0.062                         | 0.062                         |
| 2     | 3        | 436                 | 34.86                         | 34.86                         | 0.16                | 0.013                         | 0.013                         |
| 2     | 4        | 365                 | 29.20                         | 29.20                         | 0.16                | 0.013                         | 0.013                         |
| 2     | 5        | 473                 | 37.81                         | 37.81                         | 0.31                | 0.025                         | 0.025                         |
| 2     | 6        | 412                 | 32.97                         | 32.97                         | 0.29                | 0.023                         | 0.023                         |
| 2     | 7        | 366                 | 29.30                         | 29.30                         | 0.36                | 0.029                         | 0.029                         |
| 2     | 8        | 394                 | 31.55                         | 31.55                         | 0.29                | 0.023                         | 0.023                         |
| 3     | 1        | 407                 | 32.57                         | 32.57                         | 0.29                | 0.023                         | 0.023                         |
| 3     | 2        | 411                 | 32.85                         | 32.85                         | 0.73                | 0.059                         | 0.059                         |
| 3     | 3        | 403                 | 32.20                         | 32.20                         | 0.12                | 0.010                         | 0.010                         |
| 3     | 4        | 403                 | 32.21                         | 32.21                         | 0.10                | 0.008                         | 0.008                         |
| 3     | 5        | 429                 | 34.34                         | 34.34                         | 0.25                | 0.020                         | 0.020                         |
| 3     | 6        | 434                 | 34.74                         | 34.74                         | 0.12                | 0.010                         | 0.010                         |
| 3     | 7        | 400                 | 31.97                         | 31.97                         | 0.14                | 0.011                         | 0.011                         |
| 3     | 8        | 381                 | 30.50                         | 30.50                         | 0.11                | 0.009                         | 0.009                         |
| 4     | 1        | 392                 | 31.39                         | 31.39                         | 0.27                | 0.022                         | 0.022                         |
| 4     | 2        | 351                 | 28.09                         | 28.09                         | 0.44                | 0.035                         | 0.035                         |
| 4     | 3        | 114                 | 9.09                          | 9.09                          | 0.18                | 0.015                         | 0.015                         |
| 4     | 4        | 90                  | 7.22                          | 7.22                          | 0.22                | 0.018                         | 0.018                         |
| 4     | 5        | 82                  | 6.57                          | 6.57                          | 0.46                | 0.037                         | 0.037                         |
| 4     | 6        | 455                 | 36.37                         | 36.37                         | 0.28                | 0.023                         | 0.023                         |
| 4     | 7        | 387                 | 30.93                         | 30.93                         | 0.40                | 0.032                         | 0.032                         |
| 4     | 8        | 255                 | 20.40                         | 20.40                         | 0.32                | 0.025                         | 0.025                         |
| 5     | 1        | 330                 | 26.40                         | 26.40                         | 0.18                | 0.014                         | 0.014                         |
| 5     | 2        | 382                 | 30.57                         | 30.57                         | 0.52                | 0.042                         | 0.042                         |
| 5     | 3        | 406                 | 32.50                         | 32.50                         | 0.11                | 0.009                         | 0.009                         |
| 5     | 4        | 172                 | 13.77                         | 13.77                         | 0.11                | 0.008                         | 0.008                         |
| 5     | 5        | 94                  | 7.52                          | 7.52                          | 0.21                | 0.017                         | 0.017                         |
| 5     | 6        | 110                 | 8.82                          | 8.82                          | 0.12                | 0.010                         | 0.010                         |
| 5     | 7        | 368                 | 29.40                         | 29.40                         | 0.16                | 0.013                         | 0.013                         |
| 5     | 8        | 381                 | 30.47                         | 30.47                         | 0.06                | 0.005                         | 0.005                         |
|       |          |                     | Σ min                         | Σ max                         |                     | Σ min                         | Σ max                         |
| 1     |          |                     | 270                           | 270                           |                     | 0.158                         | 0.158                         |
| 2     |          |                     | 263                           | 263                           |                     | 0.208                         | 0.208                         |
| 3     |          |                     | 261                           | 261                           |                     | 0.150                         | 0.150                         |
| 4     |          |                     | 170                           | 170                           |                     | 0.206                         | 0.206                         |
| 5     |          |                     | 179                           | 179                           |                     | 0.118                         | 0.118                         |
| Mean  |          |                     | 229                           | 229                           |                     | 0.168                         | 0.168                         |
| SD    |          |                     | 49.5                          | 49.5                          |                     | 0.039                         | 0.039                         |

**Table F.** Continued Granite.

| Stone | Fraction | LAB 1<br>Cd<br>µg/l | min<br>r<br>mg/m <sup>2</sup> | max<br>r<br>mg/m <sup>2</sup> | LAB 2<br>Cd<br>µg/l | min<br>r<br>mg/m <sup>2</sup> | max<br>r<br>mg/m <sup>2</sup> |
|-------|----------|---------------------|-------------------------------|-------------------------------|---------------------|-------------------------------|-------------------------------|
| 1     | 1        | 0.02                | 0.002                         | 0.002                         | <0.01               | 0.000                         | 0.001                         |
| 1     | 2        | 0.02                | 0.002                         | 0.002                         | <0.01               | 0.000                         | 0.001                         |
| 1     | 3        | 0.03                | 0.002                         | 0.002                         | <0.01               | 0.000                         | 0.001                         |
| 1     | 4        | 0.03                | 0.002                         | 0.002                         | <0.01               | 0.000                         | 0.001                         |
| 1     | 5        | 0.03                | 0.003                         | 0.003                         | <0.01               | 0.000                         | 0.001                         |
| 1     | 6        | 0.03                | 0.003                         | 0.003                         | <0.01               | 0.000                         | 0.001                         |
| 1     | 7        | 0.03                | 0.002                         | 0.002                         | <0.01               | 0.000                         | 0.001                         |
| 1     | 8        | 0.04                | 0.003                         | 0.003                         | <0.01               | 0.000                         | 0.001                         |
| 2     | 1        | 0.02                | 0.002                         | 0.002                         | <0.01               | 0.000                         | 0.001                         |
| 2     | 2        | 0.02                | 0.002                         | 0.002                         | <0.01               | 0.000                         | 0.001                         |
| 2     | 3        | 0.02                | 0.002                         | 0.002                         | <0.01               | 0.000                         | 0.001                         |
| 2     | 4        | 0.03                | 0.002                         | 0.002                         | <0.01               | 0.000                         | 0.001                         |
| 2     | 5        | 0.03                | 0.003                         | 0.003                         | <0.01               | 0.000                         | 0.001                         |
| 2     | 6        | 0.03                | 0.002                         | 0.002                         | <0.01               | 0.000                         | 0.001                         |
| 2     | 7        | 0.03                | 0.003                         | 0.003                         | <0.01               | 0.000                         | 0.001                         |
| 2     | 8        | 0.03                | 0.002                         | 0.002                         | <0.01               | 0.000                         | 0.001                         |
| 3     | 1        | 0.03                | 0.002                         | 0.002                         | <0.01               | 0.000                         | 0.001                         |
| 3     | 2        | 0.02                | 0.002                         | 0.002                         | <0.01               | 0.000                         | 0.001                         |
| 3     | 3        | 0.03                | 0.002                         | 0.002                         | <0.01               | 0.000                         | 0.001                         |
| 3     | 4        | 0.03                | 0.002                         | 0.002                         | <0.01               | 0.000                         | 0.001                         |
| 3     | 5        | 0.03                | 0.002                         | 0.002                         | <0.01               | 0.000                         | 0.001                         |
| 3     | 6        | 0.03                | 0.003                         | 0.003                         | <0.01               | 0.000                         | 0.001                         |
| 3     | 7        | 0.03                | 0.002                         | 0.002                         | <0.01               | 0.000                         | 0.001                         |
| 3     | 8        | 0.03                | 0.002                         | 0.002                         | <0.01               | 0.000                         | 0.001                         |
| 4     | 1        | 0.02                | 0.002                         | 0.002                         | <0.01               | 0.000                         | 0.001                         |
| 4     | 2        | 0.03                | 0.002                         | 0.002                         | <0.01               | 0.000                         | 0.001                         |
| 4     | 3        | 0.01                | 0.001                         | 0.001                         | <0.01               | 0.000                         | 0.001                         |
| 4     | 4        | 0.01                | 0.001                         | 0.001                         | <0.01               | 0.000                         | 0.001                         |
| 4     | 5        | 0.01                | 0.001                         | 0.001                         | <0.01               | 0.000                         | 0.001                         |
| 4     | 6        | 0.03                | 0.002                         | 0.002                         | <0.01               | 0.000                         | 0.001                         |
| 4     | 7        | 0.03                | 0.002                         | 0.002                         | <0.01               | 0.000                         | 0.001                         |
| 4     | 8        | 0.02                | 0.001                         | 0.001                         | <0.01               | 0.000                         | 0.001                         |
| 5     | 1        | 0.03                | 0.002                         | 0.002                         | <0.01               | 0.000                         | 0.001                         |
| 5     | 2        | 0.03                | 0.002                         | 0.002                         | <0.01               | 0.000                         | 0.001                         |
| 5     | 3        | 0.03                | 0.002                         | 0.002                         | <0.01               | 0.000                         | 0.001                         |
| 5     | 4        | 0.02                | 0.001                         | 0.001                         | <0.01               | 0.000                         | 0.001                         |
| 5     | 5        | 0.01                | 0.001                         | 0.001                         | <0.01               | 0.000                         | 0.001                         |
| 5     | 6        | 0.02                | 0.001                         | 0.001                         | <0.01               | 0.000                         | 0.001                         |
| 5     | 7        | 0.03                | 0.002                         | 0.002                         | <0.01               | 0.000                         | 0.001                         |
| 5     | 8        | 0.03                | 0.002                         | 0.002                         | <0.01               | 0.000                         | 0.001                         |
|       |          |                     | Σ min                         | Σ max                         |                     | Σ min                         | Σ max                         |
| 1     |          |                     | 0.018                         | 0.018                         |                     | 0.000                         | 0.006                         |
| 2     |          |                     | 0.017                         | 0.017                         |                     | 0.000                         | 0.006                         |
| 3     |          |                     | 0.018                         | 0.018                         |                     | 0.000                         | 0.006                         |
| 4     |          |                     | 0.012                         | 0.012                         |                     | 0.000                         | 0.006                         |
| 5     |          |                     | 0.015                         | 0.015                         |                     | 0.000                         | 0.006                         |
| Mean  |          |                     | 0.016                         | 0.016                         |                     | 0.000                         | 0.006                         |
| SD    |          |                     | 0.002                         | 0.002                         |                     | 0.000                         | 0.000                         |

**Table F.** Continued Granite.

| Stone | Fraction | LAB 1<br>Co<br>µg/l | min<br>r<br>mg/m <sup>2</sup> | max<br>r<br>mg/m <sup>2</sup> | LAB 2<br>Co<br>µg/l | min<br>r<br>mg/m <sup>2</sup> | max<br>r<br>mg/m <sup>2</sup> |
|-------|----------|---------------------|-------------------------------|-------------------------------|---------------------|-------------------------------|-------------------------------|
| 1     | 1        | 0.07                | 0.006                         | 0.006                         | <0.01               | 0.000                         | 0.001                         |
| 1     | 2        | 0.06                | 0.005                         | 0.005                         | <0.01               | 0.000                         | 0.001                         |
| 1     | 3        | 0.07                | 0.006                         | 0.006                         | <0.01               | 0.000                         | 0.001                         |
| 1     | 4        | 0.07                | 0.006                         | 0.006                         | <0.01               | 0.000                         | 0.001                         |
| 1     | 5        | 0.07                | 0.006                         | 0.006                         | <0.01               | 0.000                         | 0.001                         |
| 1     | 6        | 0.07                | 0.006                         | 0.006                         | <0.01               | 0.000                         | 0.001                         |
| 1     | 7        | 0.11                | 0.009                         | 0.009                         | <0.01               | 0.000                         | 0.001                         |
| 1     | 8        | 0.12                | 0.010                         | 0.010                         | <0.01               | 0.000                         | 0.001                         |
| 2     | 1        | 0.07                | 0.006                         | 0.006                         | <0.01               | 0.000                         | 0.001                         |
| 2     | 2        | 0.06                | 0.005                         | 0.005                         | <0.01               | 0.000                         | 0.001                         |
| 2     | 3        | 0.07                | 0.005                         | 0.005                         | <0.01               | 0.000                         | 0.001                         |
| 2     | 4        | 0.07                | 0.005                         | 0.005                         | <0.01               | 0.000                         | 0.001                         |
| 2     | 5        | 0.08                | 0.006                         | 0.006                         | <0.01               | 0.000                         | 0.001                         |
| 2     | 6        | 0.07                | 0.006                         | 0.006                         | <0.01               | 0.000                         | 0.001                         |
| 2     | 7        | 0.12                | 0.010                         | 0.010                         | <0.01               | 0.000                         | 0.001                         |
| 2     | 8        | 0.12                | 0.010                         | 0.010                         | <0.01               | 0.000                         | 0.001                         |
| 3     | 1        | 0.07                | 0.006                         | 0.006                         | <0.01               | 0.000                         | 0.001                         |
| 3     | 2        | 0.07                | 0.005                         | 0.005                         | <0.01               | 0.000                         | 0.001                         |
| 3     | 3        | 0.07                | 0.006                         | 0.006                         | <0.01               | 0.000                         | 0.001                         |
| 3     | 4        | 0.07                | 0.006                         | 0.006                         | <0.01               | 0.000                         | 0.001                         |
| 3     | 5        | 0.08                | 0.006                         | 0.006                         | <0.01               | 0.000                         | 0.001                         |
| 3     | 6        | 0.07                | 0.006                         | 0.006                         | <0.01               | 0.000                         | 0.001                         |
| 3     | 7        | 0.12                | 0.009                         | 0.009                         | <0.01               | 0.000                         | 0.001                         |
| 3     | 8        | 0.11                | 0.008                         | 0.008                         | <0.01               | 0.000                         | 0.001                         |
| 4     | 1        | 0.07                | 0.006                         | 0.006                         | <0.01               | 0.000                         | 0.001                         |
| 4     | 2        | 0.07                | 0.006                         | 0.006                         | <0.01               | 0.000                         | 0.001                         |
| 4     | 3        | 0.03                | 0.003                         | 0.003                         | <0.01               | 0.000                         | 0.001                         |
| 4     | 4        | 0.05                | 0.004                         | 0.004                         | <0.01               | 0.000                         | 0.001                         |
| 4     | 5        | 0.03                | 0.003                         | 0.003                         | <0.01               | 0.000                         | 0.001                         |
| 4     | 6        | 0.08                | 0.006                         | 0.006                         | <0.01               | 0.000                         | 0.001                         |
| 4     | 7        | 0.12                | 0.010                         | 0.010                         | <0.01               | 0.000                         | 0.001                         |
| 4     | 8        | 0.08                | 0.006                         | 0.006                         | <0.01               | 0.000                         | 0.001                         |
| 5     | 1        | 0.07                | 0.006                         | 0.006                         | <0.01               | 0.000                         | 0.001                         |
| 5     | 2        | 0.07                | 0.006                         | 0.006                         | <0.01               | 0.000                         | 0.001                         |
| 5     | 3        | 0.08                | 0.006                         | 0.006                         | <0.01               | 0.000                         | 0.001                         |
| 5     | 4        | 0.05                | 0.004                         | 0.004                         | <0.01               | 0.000                         | 0.001                         |
| 5     | 5        | 0.04                | 0.003                         | 0.003                         | <0.01               | 0.000                         | 0.001                         |
| 5     | 6        | 0.05                | 0.004                         | 0.004                         | <0.01               | 0.000                         | 0.001                         |
| 5     | 7        | 0.13                | 0.010                         | 0.010                         | <0.01               | 0.000                         | 0.001                         |
| 5     | 8        | 0.11                | 0.009                         | 0.009                         | <0.01               | 0.000                         | 0.001                         |
|       |          |                     | Σ min                         | Σ max                         |                     | Σ min                         | Σ max                         |
| 1     |          |                     | 0.05                          | 0.05                          |                     | 0.000                         | 0.006                         |
| 2     |          |                     | 0.05                          | 0.05                          |                     | 0.000                         | 0.006                         |
| 3     |          |                     | 0.05                          | 0.05                          |                     | 0.000                         | 0.006                         |
| 4     |          |                     | 0.04                          | 0.04                          |                     | 0.000                         | 0.006                         |
| 5     |          |                     | 0.05                          | 0.05                          |                     | 0.000                         | 0.006                         |
| Mean  |          |                     | 0.050                         | 0.050                         |                     | 0.000                         | 0.006                         |
| SD    |          |                     | 0.004                         | 0.004                         |                     | 0.000                         | 0.000                         |

**Table F.** Continued Granite.

| Stone | Fraction | LAB 1<br>Cr<br>µg/l | min<br>r<br>mg/m <sup>2</sup> | max<br>r<br>mg/m <sup>2</sup> | LAB 2<br>Cr<br>µg/l | min<br>r<br>mg/m <sup>2</sup> | max<br>r<br>mg/m <sup>2</sup> |
|-------|----------|---------------------|-------------------------------|-------------------------------|---------------------|-------------------------------|-------------------------------|
| 1     | 1        | 0.16                | 0.013                         | 0.013                         | 0.03                | 0.002                         | 0.002                         |
| 1     | 2        | 0.09                | 0.008                         | 0.008                         | 0.01                | 0.001                         | 0.001                         |
| 1     | 3        | 0.09                | 0.007                         | 0.007                         | <0.01               | 0.000                         | 0.001                         |
| 1     | 4        | 0.06                | 0.005                         | 0.005                         | <0.01               | 0.000                         | 0.001                         |
| 1     | 5        | 0.14                | 0.011                         | 0.011                         | 0.03                | 0.003                         | 0.003                         |
| 1     | 6        | 0.07                | 0.006                         | 0.006                         | 0.01                | 0.001                         | 0.001                         |
| 1     | 7        | <0.06               | 0.000                         | 0.005                         | 0.02                | 0.002                         | 0.002                         |
| 1     | 8        | 0.42                | 0.034                         | 0.034                         | 0.01                | 0.001                         | 0.001                         |
| 2     | 1        | 0.15                | 0.012                         | 0.012                         | 0.01                | 0.001                         | 0.001                         |
| 2     | 2        | 0.07                | 0.006                         | 0.006                         | 0.01                | 0.001                         | 0.001                         |
| 2     | 3        | 0.09                | 0.007                         | 0.007                         | 0.06                | 0.005                         | 0.005                         |
| 2     | 4        | 0.09                | 0.007                         | 0.007                         | <0.01               | 0.000                         | 0.001                         |
| 2     | 5        | 0.07                | 0.006                         | 0.006                         | <0.01               | 0.000                         | 0.001                         |
| 2     | 6        | 0.12                | 0.010                         | 0.010                         | 0.01                | 0.001                         | 0.001                         |
| 2     | 7        | 0.06                | 0.005                         | 0.005                         | 0.01                | 0.001                         | 0.001                         |
| 2     | 8        | 0.13                | 0.010                         | 0.010                         | 0.01                | 0.001                         | 0.001                         |
| 3     | 1        | 0.22                | 0.017                         | 0.017                         | 0.01                | 0.001                         | 0.001                         |
| 3     | 2        | 0.09                | 0.007                         | 0.007                         | <0.01               | 0.000                         | 0.001                         |
| 3     | 3        | 0.09                | 0.007                         | 0.007                         | <0.01               | 0.000                         | 0.001                         |
| 3     | 4        | 0.06                | 0.005                         | 0.005                         | <0.01               | 0.000                         | 0.001                         |
| 3     | 5        | 0.07                | 0.005                         | 0.005                         | <0.01               | 0.000                         | 0.001                         |
| 3     | 6        | 0.07                | 0.005                         | 0.005                         | <0.01               | 0.000                         | 0.001                         |
| 3     | 7        | <0.06               | 0.000                         | 0.005                         | 0.01                | 0.001                         | 0.001                         |
| 3     | 8        | <0.06               | 0.000                         | 0.005                         | <0.01               | 0.000                         | 0.001                         |
| 4     | 1        | 0.42                | 0.033                         | 0.033                         | 0.01                | 0.001                         | 0.001                         |
| 4     | 2        | 0.09                | 0.007                         | 0.007                         | <0.01               | 0.000                         | 0.001                         |
| 4     | 3        | <0.06               | 0.000                         | 0.005                         | <0.01               | 0.000                         | 0.001                         |
| 4     | 4        | <0.06               | 0.000                         | 0.005                         | <0.01               | 0.000                         | 0.001                         |
| 4     | 5        | <0.06               | 0.000                         | 0.005                         | 0.01                | 0.001                         | 0.001                         |
| 4     | 6        | 0.07                | 0.006                         | 0.006                         | 0.01                | 0.001                         | 0.001                         |
| 4     | 7        | <0.06               | 0.000                         | 0.005                         | 0.02                | 0.002                         | 0.002                         |
| 4     | 8        | 0.06                | 0.005                         | 0.005                         | 0.02                | 0.001                         | 0.001                         |
| 5     | 1        | 0.24                | 0.019                         | 0.019                         | 0.02                | 0.002                         | 0.002                         |
| 5     | 2        | 0.10                | 0.008                         | 0.008                         | 0.02                | 0.002                         | 0.002                         |
| 5     | 3        | 0.09                | 0.008                         | 0.008                         | <0.01               | 0.000                         | 0.001                         |
| 5     | 4        | 0.05                | 0.004                         | 0.004                         | <0.01               | 0.000                         | 0.001                         |
| 5     | 5        | 0.07                | 0.006                         | 0.006                         | <0.01               | 0.000                         | 0.001                         |
| 5     | 6        | <0.06               | 0.000                         | 0.005                         | <0.01               | 0.000                         | 0.001                         |
| 5     | 7        | 0.06                | 0.005                         | 0.005                         | 0.02                | 0.001                         | 0.001                         |
| 5     | 8        | 0.46                | 0.037                         | 0.037                         | 0.01                | 0.001                         | 0.001                         |
|       |          |                     | Σ min                         | Σ max                         |                     | Σ min                         | Σ max                         |
| 1     |          |                     | 0.083                         | 0.088                         |                     | 0.009                         | 0.011                         |
| 2     |          |                     | 0.063                         | 0.063                         |                     | 0.010                         | 0.011                         |
| 3     |          |                     | 0.048                         | 0.057                         |                     | 0.002                         | 0.007                         |
| 4     |          |                     | 0.051                         | 0.070                         |                     | 0.006                         | 0.009                         |
| 5     |          |                     | 0.086                         | 0.091                         |                     | 0.006                         | 0.009                         |
| Mean  |          |                     | 0.066                         | 0.074                         |                     | 0.006                         | 0.009                         |
| SD    |          |                     | 0.018                         | 0.015                         |                     | 0.003                         | 0.002                         |

**Table F.** Continued Granite.

| Stone | Fraction | LAB 1<br>Cu<br>µg/l | min<br>r<br>mg/m <sup>2</sup> | max<br>r<br>mg/m <sup>2</sup> | LAB 2<br>Cu<br>µg/l | min<br>r<br>mg/m <sup>2</sup> | max<br>r<br>mg/m <sup>2</sup> |
|-------|----------|---------------------|-------------------------------|-------------------------------|---------------------|-------------------------------|-------------------------------|
| 1     | 1        | 6.20                | 0.496                         | 0.496                         | 0.32                | 0.026                         | 0.026                         |
| 1     | 2        | 2.40                | 0.192                         | 0.192                         | <0.03               | 0.000                         | 0.002                         |
| 1     | 3        | 2.62                | 0.210                         | 0.210                         | <0.03               | 0.000                         | 0.002                         |
| 1     | 4        | 2.41                | 0.193                         | 0.193                         | <0.03               | 0.000                         | 0.002                         |
| 1     | 5        | 2.86                | 0.229                         | 0.229                         | <0.03               | 0.000                         | 0.002                         |
| 1     | 6        | 2.12                | 0.170                         | 0.170                         | <0.03               | 0.000                         | 0.002                         |
| 1     | 7        | 1.91                | 0.153                         | 0.153                         | <0.03               | 0.000                         | 0.002                         |
| 1     | 8        | 2.17                | 0.173                         | 0.173                         | <0.03               | 0.000                         | 0.002                         |
| 2     | 1        | 3.21                | 0.257                         | 0.257                         | 0.03                | 0.002                         | 0.002                         |
| 2     | 2        | 3.22                | 0.258                         | 0.258                         | <0.03               | 0.000                         | 0.002                         |
| 2     | 3        | 2.37                | 0.190                         | 0.190                         | <0.03               | 0.000                         | 0.002                         |
| 2     | 4        | 2.27                | 0.182                         | 0.182                         | <0.03               | 0.000                         | 0.002                         |
| 2     | 5        | 2.26                | 0.181                         | 0.181                         | <0.03               | 0.000                         | 0.002                         |
| 2     | 6        | 2.24                | 0.179                         | 0.179                         | <0.03               | 0.000                         | 0.002                         |
| 2     | 7        | 1.77                | 0.141                         | 0.141                         | <0.03               | 0.000                         | 0.002                         |
| 2     | 8        | 2.01                | 0.161                         | 0.161                         | <0.03               | 0.000                         | 0.002                         |
| 3     | 1        | 7.53                | 0.603                         | 0.603                         | 0.03                | 0.003                         | 0.003                         |
| 3     | 2        | 2.96                | 0.237                         | 0.237                         | <0.03               | 0.000                         | 0.002                         |
| 3     | 3        | 2.35                | 0.188                         | 0.188                         | <0.03               | 0.000                         | 0.002                         |
| 3     | 4        | 1.49                | 0.119                         | 0.119                         | <0.03               | 0.000                         | 0.002                         |
| 3     | 5        | 2.30                | 0.184                         | 0.184                         | <0.03               | 0.000                         | 0.002                         |
| 3     | 6        | 2.18                | 0.174                         | 0.174                         | <0.03               | 0.000                         | 0.002                         |
| 3     | 7        | 1.49                | 0.119                         | 0.119                         | <0.03               | 0.000                         | 0.002                         |
| 3     | 8        | 1.43                | 0.114                         | 0.114                         | <0.03               | 0.000                         | 0.002                         |
| 4     | 1        | 14.06               | 1.125                         | 1.125                         | 0.05                | 0.004                         | 0.004                         |
| 4     | 2        | 2.91                | 0.233                         | 0.233                         | <0.03               | 0.000                         | 0.002                         |
| 4     | 3        | 1.92                | 0.154                         | 0.154                         | <0.03               | 0.000                         | 0.002                         |
| 4     | 4        | 2.01                | 0.161                         | 0.161                         | <0.03               | 0.000                         | 0.002                         |
| 4     | 5        | 1.71                | 0.137                         | 0.137                         | 0.03                | 0.003                         | 0.003                         |
| 4     | 6        | 2.33                | 0.187                         | 0.187                         | <0.03               | 0.000                         | 0.002                         |
| 4     | 7        | 1.46                | 0.117                         | 0.117                         | <0.03               | 0.000                         | 0.002                         |
| 4     | 8        | 1.50                | 0.120                         | 0.120                         | <0.03               | 0.000                         | 0.002                         |
| 5     | 1        | 7.06                | 0.564                         | 0.564                         | 0.04                | 0.003                         | 0.003                         |
| 5     | 2        | 4.07                | 0.326                         | 0.326                         | <0.03               | 0.000                         | 0.002                         |
| 5     | 3        | 3.58                | 0.287                         | 0.287                         | <0.03               | 0.000                         | 0.002                         |
| 5     | 4        | 2.35                | 0.188                         | 0.188                         | <0.03               | 0.000                         | 0.002                         |
| 5     | 5        | 3.05                | 0.244                         | 0.244                         | <0.03               | 0.000                         | 0.002                         |
| 5     | 6        | 2.27                | 0.181                         | 0.181                         | <0.03               | 0.000                         | 0.002                         |
| 5     | 7        | 2.34                | 0.187                         | 0.187                         | 0.08                | 0.007                         | 0.007                         |
| 5     | 8        | 2.41                | 0.192                         | 0.192                         | <0.03               | 0.000                         | 0.002                         |
|       |          |                     | Σ min                         | Σ max                         |                     | Σ min                         | Σ max                         |
| 1     |          |                     | 1.816                         | 1.816                         |                     | 0.026                         | 0.043                         |
| 2     |          |                     | 1.549                         | 1.549                         |                     | 0.002                         | 0.019                         |
| 3     |          |                     | 1.738                         | 1.738                         |                     | 0.003                         | 0.019                         |
| 4     |          |                     | 2.233                         | 2.233                         |                     | 0.007                         | 0.021                         |
| 5     |          |                     | 2.170                         | 2.170                         |                     | 0.010                         | 0.024                         |
| Mean  |          |                     | 1.901                         | 1.901                         |                     | 0.010                         | 0.025                         |
| SD    |          |                     | 0.292                         | 0.292                         |                     | 0.010                         | 0.010                         |

**Table F.** Continued Granite.

| Stone | Fraction | LAB 1<br>Mn<br>µg/l | min<br>r<br>mg/m <sup>2</sup> | max<br>r<br>mg/m <sup>2</sup> | LAB 2<br>Mn<br>µg/l | min<br>r<br>mg/m <sup>2</sup> | max<br>r<br>mg/m <sup>2</sup> |
|-------|----------|---------------------|-------------------------------|-------------------------------|---------------------|-------------------------------|-------------------------------|
| 1     | 1        | 1.977               | 0.158                         | 0.158                         | 1.78                | 0.143                         | 0.143                         |
| 1     | 2        | 1.036               | 0.083                         | 0.083                         | 0.69                | 0.055                         | 0.055                         |
| 1     | 3        | 1.147               | 0.092                         | 0.092                         | 0.42                | 0.033                         | 0.033                         |
| 1     | 4        | 1.281               | 0.102                         | 0.102                         | 0.37                | 0.029                         | 0.029                         |
| 1     | 5        | 2.014               | 0.161                         | 0.161                         | 0.50                | 0.040                         | 0.040                         |
| 1     | 6        | 2.425               | 0.194                         | 0.194                         | 0.57                | 0.046                         | 0.046                         |
| 1     | 7        | 8.181               | 0.654                         | 0.654                         | 0.66                | 0.053                         | 0.053                         |
| 1     | 8        | 7.642               | 0.611                         | 0.611                         | 0.53                | 0.043                         | 0.043                         |
| 2     | 1        | 0.976               | 0.078                         | 0.078                         | 2.22                | 0.177                         | 0.177                         |
| 2     | 2        | 0.620               | 0.050                         | 0.050                         | 2.03                | 0.163                         | 0.163                         |
| 2     | 3        | 0.837               | 0.067                         | 0.067                         | 1.27                | 0.101                         | 0.101                         |
| 2     | 4        | 0.628               | 0.050                         | 0.050                         | 0.93                | 0.074                         | 0.074                         |
| 2     | 5        | 0.996               | 0.080                         | 0.080                         | 0.22                | 0.018                         | 0.018                         |
| 2     | 6        | 1.159               | 0.093                         | 0.093                         | 0.40                | 0.032                         | 0.032                         |
| 2     | 7        | 3.109               | 0.249                         | 0.249                         | 0.42                | 0.034                         | 0.034                         |
| 2     | 8        | 2.996               | 0.240                         | 0.240                         | 0.41                | 0.033                         | 0.033                         |
| 3     | 1        | 1.427               | 0.114                         | 0.114                         | 1.09                | 0.087                         | 0.087                         |
| 3     | 2        | 1.248               | 0.100                         | 0.100                         | 1.02                | 0.081                         | 0.081                         |
| 3     | 3        | 1.065               | 0.085                         | 0.085                         | 0.79                | 0.063                         | 0.063                         |
| 3     | 4        | 1.272               | 0.102                         | 0.102                         | 0.71                | 0.057                         | 0.057                         |
| 3     | 5        | 1.813               | 0.145                         | 0.145                         | 1.02                | 0.082                         | 0.082                         |
| 3     | 6        | 2.020               | 0.162                         | 0.162                         | 0.86                | 0.069                         | 0.069                         |
| 3     | 7        | 12.251              | 0.980                         | 0.980                         | 0.94                | 0.075                         | 0.075                         |
| 3     | 8        | 4.461               | 0.357                         | 0.357                         | 0.75                | 0.060                         | 0.060                         |
| 4     | 1        | 1.986               | 0.159                         | 0.159                         | 1.81                | 0.145                         | 0.145                         |
| 4     | 2        | 0.438               | 0.035                         | 0.035                         | 1.69                | 0.135                         | 0.135                         |
| 4     | 3        | 0.433               | 0.035                         | 0.035                         | 1.59                | 0.127                         | 0.127                         |
| 4     | 4        | 0.576               | 0.046                         | 0.046                         | 1.46                | 0.116                         | 0.116                         |
| 4     | 5        | 0.602               | 0.048                         | 0.048                         | 0.78                | 0.063                         | 0.063                         |
| 4     | 6        | 0.992               | 0.079                         | 0.079                         | 0.93                | 0.074                         | 0.074                         |
| 4     | 7        | 2.786               | 0.223                         | 0.223                         | 1.28                | 0.102                         | 0.102                         |
| 4     | 8        | 2.031               | 0.162                         | 0.162                         | 1.43                | 0.114                         | 0.114                         |
| 5     | 1        | 2.153               | 0.172                         | 0.172                         | 1.28                | 0.102                         | 0.102                         |
| 5     | 2        | 1.336               | 0.107                         | 0.107                         | 1.06                | 0.085                         | 0.085                         |
| 5     | 3        | 1.503               | 0.120                         | 0.120                         | 0.79                | 0.063                         | 0.063                         |
| 5     | 4        | 0.737               | 0.059                         | 0.059                         | 0.94                | 0.075                         | 0.075                         |
| 5     | 5        | 1.948               | 0.156                         | 0.156                         | 1.09                | 0.087                         | 0.087                         |
| 5     | 6        | 1.830               | 0.146                         | 0.146                         | 1.01                | 0.081                         | 0.081                         |
| 5     | 7        | 6.950               | 0.556                         | 0.556                         | 0.94                | 0.075                         | 0.075                         |
| 5     | 8        | 6.677               | 0.534                         | 0.534                         | 0.82                | 0.065                         | 0.065                         |
|       |          |                     | Σ min                         | Σ max                         |                     | Σ min                         | Σ max                         |
| 1     |          |                     | 2.056                         | 2.056                         |                     | 0.442                         | 0.442                         |
| 2     |          |                     | 0.906                         | 0.906                         |                     | 0.632                         | 0.632                         |
| 3     |          |                     | 2.045                         | 2.045                         |                     | 0.575                         | 0.575                         |
| 4     |          |                     | 0.787                         | 0.787                         |                     | 0.877                         | 0.877                         |
| 5     |          |                     | 1.850                         | 1.850                         |                     | 0.633                         | 0.633                         |
| Mean  |          |                     | 1.529                         | 1.529                         |                     | 0.632                         | 0.632                         |
| SD    |          |                     | 0.629                         | 0.629                         |                     | 0.158                         | 0.158                         |

**Table F.** Continued Granite.

| Stone | Fraction | LAB 1<br>Mo<br>µg/l | min<br>r<br>mg/m <sup>2</sup> | max<br>r<br>mg/m <sup>2</sup> | LAB 2<br>Mo<br>µg/l | min<br>r<br>mg/m <sup>2</sup> | max<br>r<br>mg/m <sup>2</sup> |
|-------|----------|---------------------|-------------------------------|-------------------------------|---------------------|-------------------------------|-------------------------------|
| 1     | 1        | 0.07                | 0.006                         | 0.006                         | <0.05               | 0.000                         | 0.004                         |
| 1     | 2        | <0.06               | 0.000                         | 0.005                         | <0.05               | 0.000                         | 0.004                         |
| 1     | 3        | <0.06               | 0.000                         | 0.005                         | <0.05               | 0.000                         | 0.004                         |
| 1     | 4        | 0.06                | 0.005                         | 0.005                         | <0.05               | 0.000                         | 0.004                         |
| 1     | 5        | <0.06               | 0.000                         | 0.005                         | <0.05               | 0.000                         | 0.004                         |
| 1     | 6        | <0.06               | 0.000                         | 0.005                         | <0.05               | 0.000                         | 0.004                         |
| 1     | 7        | <0.06               | 0.000                         | 0.005                         | <0.05               | 0.000                         | 0.004                         |
| 1     | 8        | <0.06               | 0.000                         | 0.005                         | <0.05               | 0.000                         | 0.004                         |
| 2     | 1        | <0.06               | 0.000                         | 0.005                         | <0.05               | 0.000                         | 0.004                         |
| 2     | 2        | <0.06               | 0.000                         | 0.005                         | <0.05               | 0.000                         | 0.004                         |
| 2     | 3        | <0.06               | 0.000                         | 0.005                         | <0.05               | 0.000                         | 0.004                         |
| 2     | 4        | <0.06               | 0.000                         | 0.005                         | <0.05               | 0.000                         | 0.004                         |
| 2     | 5        | <0.06               | 0.000                         | 0.005                         | <0.05               | 0.000                         | 0.004                         |
| 2     | 6        | <0.06               | 0.000                         | 0.005                         | <0.05               | 0.000                         | 0.004                         |
| 2     | 7        | <0.06               | 0.000                         | 0.005                         | <0.05               | 0.000                         | 0.004                         |
| 2     | 8        | <0.06               | 0.000                         | 0.005                         | <0.05               | 0.000                         | 0.004                         |
| 3     | 1        | <0.06               | 0.000                         | 0.005                         | 0.06                | 0.005                         | 0.005                         |
| 3     | 2        | <0.06               | 0.000                         | 0.005                         | <0.05               | 0.000                         | 0.004                         |
| 3     | 3        | <0.06               | 0.000                         | 0.005                         | <0.05               | 0.000                         | 0.004                         |
| 3     | 4        | <0.06               | 0.000                         | 0.005                         | <0.05               | 0.000                         | 0.004                         |
| 3     | 5        | <0.06               | 0.000                         | 0.005                         | <0.05               | 0.000                         | 0.004                         |
| 3     | 6        | <0.06               | 0.000                         | 0.005                         | <0.05               | 0.000                         | 0.004                         |
| 3     | 7        | <0.06               | 0.000                         | 0.005                         | <0.05               | 0.000                         | 0.004                         |
| 3     | 8        | <0.06               | 0.000                         | 0.005                         | <0.05               | 0.000                         | 0.004                         |
| 4     | 1        | <0.06               | 0.000                         | 0.005                         | <0.05               | 0.000                         | 0.004                         |
| 4     | 2        | <0.06               | 0.000                         | 0.005                         | <0.05               | 0.000                         | 0.004                         |
| 4     | 3        | <0.06               | 0.000                         | 0.005                         | <0.05               | 0.000                         | 0.004                         |
| 4     | 4        | <0.06               | 0.000                         | 0.005                         | <0.05               | 0.000                         | 0.004                         |
| 4     | 5        | <0.06               | 0.000                         | 0.005                         | <0.05               | 0.000                         | 0.004                         |
| 4     | 6        | <0.06               | 0.000                         | 0.005                         | <0.05               | 0.000                         | 0.004                         |
| 4     | 7        | 0.08                | 0.006                         | 0.006                         | <0.05               | 0.000                         | 0.004                         |
| 4     | 8        | 0.07                | 0.005                         | 0.005                         | <0.05               | 0.000                         | 0.004                         |
| 5     | 1        | 0.04                | 0.003                         | 0.003                         | <0.05               | 0.000                         | 0.004                         |
| 5     | 2        | 0.04                | 0.003                         | 0.003                         | <0.05               | 0.000                         | 0.004                         |
| 5     | 3        | 0.04                | 0.003                         | 0.003                         | <0.05               | 0.000                         | 0.004                         |
| 5     | 4        | 0.11                | 0.008                         | 0.008                         | <0.05               | 0.000                         | 0.004                         |
| 5     | 5        | 0.04                | 0.003                         | 0.003                         | <0.05               | 0.000                         | 0.004                         |
| 5     | 6        | 0.04                | 0.004                         | 0.004                         | <0.05               | 0.000                         | 0.004                         |
| 5     | 7        | 0.09                | 0.007                         | 0.007                         | <0.05               | 0.000                         | 0.004                         |
| 5     | 8        | 0.07                | 0.006                         | 0.006                         | <0.05               | 0.000                         | 0.004                         |
|       |          |                     | Σ min                         | Σ max                         |                     | Σ min                         | Σ max                         |
| 1     |          |                     | 0.010                         | 0.039                         |                     | 0.000                         | 0.032                         |
| 2     |          |                     | 0.000                         | 0.038                         |                     | 0.000                         | 0.032                         |
| 3     |          |                     | 0.000                         | 0.038                         |                     | 0.005                         | 0.033                         |
| 4     |          |                     | 0.012                         | 0.040                         |                     | 0.000                         | 0.032                         |
| 5     |          |                     | 0.037                         | 0.037                         |                     | 0.000                         | 0.032                         |
| Mean  |          |                     | 0.012                         | 0.039                         |                     | 0.001                         | 0.032                         |
| SD    |          |                     | 0.015                         | 0.001                         |                     | 0.002                         | 0.000                         |

**Table F.** Continued Granite.

| Stone | Fraction | LAB 1<br>Ni<br>µg/l | min<br>r<br>mg/m <sup>2</sup> | max<br>r<br>mg/m <sup>2</sup> | LAB 2<br>Ni<br>µg/l | min<br>r<br>mg/m <sup>2</sup> | max<br>r<br>mg/m <sup>2</sup> |
|-------|----------|---------------------|-------------------------------|-------------------------------|---------------------|-------------------------------|-------------------------------|
| 1     | 1        | 0.67                | 0.054                         | 0.054                         | 0.17                | 0.014                         | 0.014                         |
| 1     | 2        | 0.31                | 0.025                         | 0.025                         | 0.07                | 0.006                         | 0.006                         |
| 1     | 3        | 0.32                | 0.026                         | 0.026                         | <0.02               | 0.000                         | 0.002                         |
| 1     | 4        | 0.26                | 0.021                         | 0.021                         | <0.02               | 0.000                         | 0.002                         |
| 1     | 5        | 0.39                | 0.031                         | 0.031                         | <0.02               | 0.000                         | 0.002                         |
| 1     | 6        | 0.22                | 0.017                         | 0.017                         | 0.03                | 0.002                         | 0.002                         |
| 1     | 7        | 0.42                | 0.034                         | 0.034                         | 0.03                | 0.002                         | 0.002                         |
| 1     | 8        | 0.26                | 0.021                         | 0.021                         | 0.03                | 0.002                         | 0.002                         |
| 2     | 1        | 0.43                | 0.035                         | 0.035                         | 0.05                | 0.004                         | 0.004                         |
| 2     | 2        | 0.28                | 0.023                         | 0.023                         | 0.02                | 0.002                         | 0.002                         |
| 2     | 3        | 0.28                | 0.023                         | 0.023                         | 0.02                | 0.002                         | 0.002                         |
| 2     | 4        | 0.27                | 0.022                         | 0.022                         | 0.02                | 0.002                         | 0.002                         |
| 2     | 5        | 0.30                | 0.024                         | 0.024                         | 0.02                | 0.002                         | 0.002                         |
| 2     | 6        | 0.34                | 0.027                         | 0.027                         | 0.02                | 0.002                         | 0.002                         |
| 2     | 7        | 0.52                | 0.041                         | 0.041                         | <0.02               | 0.000                         | 0.002                         |
| 2     | 8        | 0.22                | 0.017                         | 0.017                         | <0.02               | 0.000                         | 0.002                         |
| 3     | 1        | 0.59                | 0.047                         | 0.047                         | 0.03                | 0.003                         | 0.003                         |
| 3     | 2        | 0.33                | 0.026                         | 0.026                         | 0.03                | 0.002                         | 0.002                         |
| 3     | 3        | 0.28                | 0.022                         | 0.022                         | <0.02               | 0.000                         | 0.002                         |
| 3     | 4        | 0.24                | 0.019                         | 0.019                         | <0.02               | 0.000                         | 0.002                         |
| 3     | 5        | 0.34                | 0.028                         | 0.028                         | <0.02               | 0.000                         | 0.002                         |
| 3     | 6        | 0.25                | 0.020                         | 0.020                         | 0.03                | 0.003                         | 0.003                         |
| 3     | 7        | 0.27                | 0.022                         | 0.022                         | 0.02                | 0.002                         | 0.002                         |
| 3     | 8        | 0.18                | 0.015                         | 0.015                         | <0.02               | 0.000                         | 0.002                         |
| 4     | 1        | 1.01                | 0.081                         | 0.081                         | 0.04                | 0.003                         | 0.003                         |
| 4     | 2        | 0.29                | 0.023                         | 0.023                         | <0.02               | 0.000                         | 0.002                         |
| 4     | 3        | 0.15                | 0.012                         | 0.012                         | <0.02               | 0.000                         | 0.002                         |
| 4     | 4        | 0.16                | 0.013                         | 0.013                         | <0.02               | 0.000                         | 0.002                         |
| 4     | 5        | 0.17                | 0.013                         | 0.013                         | <0.02               | 0.000                         | 0.002                         |
| 4     | 6        | 0.26                | 0.021                         | 0.021                         | 0.02                | 0.002                         | 0.002                         |
| 4     | 7        | 0.27                | 0.022                         | 0.022                         | 0.02                | 0.002                         | 0.002                         |
| 4     | 8        | 0.17                | 0.014                         | 0.014                         | <0.02               | 0.000                         | 0.002                         |
| 5     | 1        | 0.79                | 0.064                         | 0.064                         | 0.13                | 0.011                         | 0.011                         |
| 5     | 2        | 0.46                | 0.037                         | 0.037                         | 0.04                | 0.003                         | 0.003                         |
| 5     | 3        | 0.50                | 0.040                         | 0.040                         | 0.03                | 0.002                         | 0.002                         |
| 5     | 4        | 0.21                | 0.017                         | 0.017                         | 0.03                | 0.002                         | 0.002                         |
| 5     | 5        | 0.36                | 0.029                         | 0.029                         | 0.03                | 0.002                         | 0.002                         |
| 5     | 6        | 0.21                | 0.017                         | 0.017                         | 0.03                | 0.002                         | 0.002                         |
| 5     | 7        | 0.76                | 0.060                         | 0.060                         | 0.03                | 0.003                         | 0.003                         |
| 5     | 8        | 0.39                | 0.031                         | 0.031                         | 0.03                | 0.002                         | 0.002                         |
|       |          |                     | Σ min                         | Σ max                         |                     | Σ min                         | Σ max                         |
| 1     |          |                     | 0.228                         | 0.228                         |                     | 0.026                         | 0.031                         |
| 2     |          |                     | 0.212                         | 0.212                         |                     | 0.013                         | 0.016                         |
| 3     |          |                     | 0.197                         | 0.197                         |                     | 0.009                         | 0.015                         |
| 4     |          |                     | 0.199                         | 0.199                         |                     | 0.007                         | 0.015                         |
| 5     |          |                     | 0.294                         | 0.294                         |                     | 0.028                         | 0.028                         |
| Mean  |          |                     | 0.226                         | 0.226                         |                     | 0.016                         | 0.021                         |
| SD    |          |                     | 0.040                         | 0.040                         |                     | 0.010                         | 0.008                         |

**Table F.** Continued Granite.

| Stone | Fraction | LAB 1<br>Pb<br>µg/l | min<br>r<br>mg/m <sup>2</sup> | max<br>r<br>mg/m <sup>2</sup> | LAB 2<br>Pb<br>µg/l | min<br>r<br>mg/m <sup>2</sup> | max<br>r<br>mg/m <sup>2</sup> |
|-------|----------|---------------------|-------------------------------|-------------------------------|---------------------|-------------------------------|-------------------------------|
| 1     | 1        | 0.12                | 0.009                         | 0.009                         | <0.01               | 0.000                         | 0.001                         |
| 1     | 2        | 0.12                | 0.009                         | 0.009                         | 0.01                | 0.001                         | 0.001                         |
| 1     | 3        | 0.23                | 0.018                         | 0.018                         | <0.01               | 0.000                         | 0.001                         |
| 1     | 4        | 0.19                | 0.015                         | 0.015                         | <0.01               | 0.000                         | 0.001                         |
| 1     | 5        | 0.61                | 0.049                         | 0.049                         | <0.01               | 0.000                         | 0.001                         |
| 1     | 6        | 0.31                | 0.025                         | 0.025                         | <0.01               | 0.000                         | 0.001                         |
| 1     | 7        | 0.08                | 0.006                         | 0.006                         | <0.01               | 0.000                         | 0.001                         |
| 1     | 8        | 0.18                | 0.014                         | 0.014                         | <0.01               | 0.000                         | 0.001                         |
| 2     | 1        | 0.15                | 0.012                         | 0.012                         | <0.01               | 0.000                         | 0.001                         |
| 2     | 2        | 0.12                | 0.010                         | 0.010                         | <0.01               | 0.000                         | 0.001                         |
| 2     | 3        | 0.18                | 0.014                         | 0.014                         | <0.01               | 0.000                         | 0.001                         |
| 2     | 4        | 0.26                | 0.021                         | 0.021                         | <0.01               | 0.000                         | 0.001                         |
| 2     | 5        | 0.26                | 0.021                         | 0.021                         | <0.01               | 0.000                         | 0.001                         |
| 2     | 6        | 0.30                | 0.024                         | 0.024                         | <0.01               | 0.000                         | 0.001                         |
| 2     | 7        | 0.08                | 0.007                         | 0.007                         | <0.01               | 0.000                         | 0.001                         |
| 2     | 8        | 0.10                | 0.008                         | 0.008                         | <0.01               | 0.000                         | 0.001                         |
| 3     | 1        | 0.10                | 0.008                         | 0.008                         | 0.02                | 0.002                         | 0.002                         |
| 3     | 2        | 0.08                | 0.007                         | 0.007                         | 0.02                | 0.002                         | 0.002                         |
| 3     | 3        | 0.12                | 0.009                         | 0.009                         | <0.01               | 0.000                         | 0.001                         |
| 3     | 4        | 0.66                | 0.052                         | 0.052                         | <0.01               | 0.000                         | 0.001                         |
| 3     | 5        | 0.15                | 0.012                         | 0.012                         | <0.01               | 0.000                         | 0.001                         |
| 3     | 6        | 0.18                | 0.014                         | 0.014                         | <0.01               | 0.000                         | 0.001                         |
| 3     | 7        | 0.06                | 0.005                         | 0.005                         | <0.01               | 0.000                         | 0.001                         |
| 3     | 8        | 0.04                | 0.003                         | 0.003                         | <0.01               | 0.000                         | 0.001                         |
| 4     | 1        | 0.13                | 0.011                         | 0.011                         | 0.02                | 0.002                         | 0.002                         |
| 4     | 2        | 0.09                | 0.007                         | 0.007                         | <0.01               | 0.000                         | 0.001                         |
| 4     | 3        | 0.11                | 0.009                         | 0.009                         | <0.01               | 0.000                         | 0.001                         |
| 4     | 4        | 0.10                | 0.008                         | 0.008                         | <0.01               | 0.000                         | 0.001                         |
| 4     | 5        | 0.14                | 0.011                         | 0.011                         | 0.02                | 0.001                         | 0.001                         |
| 4     | 6        | 0.16                | 0.013                         | 0.013                         | <0.01               | 0.000                         | 0.001                         |
| 4     | 7        | 0.07                | 0.006                         | 0.006                         | <0.01               | 0.000                         | 0.001                         |
| 4     | 8        | 0.06                | 0.005                         | 0.005                         | <0.01               | 0.000                         | 0.001                         |
| 5     | 1        | 0.43                | 0.035                         | 0.035                         | <0.01               | 0.000                         | 0.001                         |
| 5     | 2        | 0.12                | 0.010                         | 0.010                         | <0.01               | 0.000                         | 0.001                         |
| 5     | 3        | 0.21                | 0.017                         | 0.017                         | <0.01               | 0.000                         | 0.001                         |
| 5     | 4        | 0.12                | 0.010                         | 0.010                         | <0.01               | 0.000                         | 0.001                         |
| 5     | 5        | 0.54                | 0.043                         | 0.043                         | <0.01               | 0.000                         | 0.001                         |
| 5     | 6        | 0.23                | 0.018                         | 0.018                         | <0.01               | 0.000                         | 0.001                         |
| 5     | 7        | 0.10                | 0.008                         | 0.008                         | <0.01               | 0.000                         | 0.001                         |
| 5     | 8        | 0.12                | 0.010                         | 0.010                         | <0.01               | 0.000                         | 0.001                         |
|       |          |                     | Σ min                         | Σ max                         |                     | Σ min                         | Σ max                         |
| 1     |          |                     | 0.146                         | 0.146                         |                     | 0.001                         | 0.007                         |
| 2     |          |                     | 0.116                         | 0.116                         |                     | 0.000                         | 0.006                         |
| 3     |          |                     | 0.111                         | 0.111                         |                     | 0.003                         | 0.008                         |
| 4     |          |                     | 0.069                         | 0.069                         |                     | 0.003                         | 0.008                         |
| 5     |          |                     | 0.151                         | 0.151                         |                     | 0.000                         | 0.006                         |
| Mean  |          |                     | 0.119                         | 0.119                         |                     | 0.002                         | 0.007                         |
| SD    |          |                     | 0.033                         | 0.033                         |                     | 0.002                         | 0.001                         |

**Table F.** Continued Granite.

| Stone | Fraction | LAB 1<br>Sb<br>µg/l | min<br>r<br>mg/m <sup>2</sup> | max<br>r<br>mg/m <sup>2</sup> | LAB 2<br>Sb<br>µg/l | min<br>r<br>mg/m <sup>2</sup> | max<br>r<br>mg/m <sup>2</sup> |
|-------|----------|---------------------|-------------------------------|-------------------------------|---------------------|-------------------------------|-------------------------------|
| 1     | 1        | 0.09                | 0.007                         | 0.007                         | 0.03                | 0.002                         | 0.002                         |
| 1     | 2        | 0.06                | 0.005                         | 0.005                         | <0.02               | 0.000                         | 0.002                         |
| 1     | 3        | 0.08                | 0.006                         | 0.006                         | <0.02               | 0.000                         | 0.002                         |
| 1     | 4        | 0.07                | 0.006                         | 0.006                         | <0.02               | 0.000                         | 0.002                         |
| 1     | 5        | 0.08                | 0.006                         | 0.006                         | <0.02               | 0.000                         | 0.002                         |
| 1     | 6        | 0.07                | 0.005                         | 0.005                         | <0.02               | 0.000                         | 0.002                         |
| 1     | 7        | 0.23                | 0.018                         | 0.018                         | <0.02               | 0.000                         | 0.002                         |
| 1     | 8        | 0.26                | 0.021                         | 0.021                         | <0.02               | 0.000                         | 0.002                         |
| 2     | 1        | 0.09                | 0.007                         | 0.007                         | <0.02               | 0.000                         | 0.002                         |
| 2     | 2        | 0.08                | 0.006                         | 0.006                         | <0.02               | 0.000                         | 0.002                         |
| 2     | 3        | 0.08                | 0.006                         | 0.006                         | <0.02               | 0.000                         | 0.002                         |
| 2     | 4        | 0.07                | 0.006                         | 0.006                         | <0.02               | 0.000                         | 0.002                         |
| 2     | 5        | 0.07                | 0.006                         | 0.006                         | <0.02               | 0.000                         | 0.002                         |
| 2     | 6        | 0.08                | 0.007                         | 0.007                         | <0.02               | 0.000                         | 0.002                         |
| 2     | 7        | 0.29                | 0.023                         | 0.023                         | <0.02               | 0.000                         | 0.002                         |
| 2     | 8        | 0.28                | 0.023                         | 0.023                         | <0.02               | 0.000                         | 0.002                         |
| 3     | 1        | 0.08                | 0.006                         | 0.006                         | <0.02               | 0.000                         | 0.002                         |
| 3     | 2        | 0.09                | 0.007                         | 0.007                         | <0.02               | 0.000                         | 0.002                         |
| 3     | 3        | 0.08                | 0.007                         | 0.007                         | <0.02               | 0.000                         | 0.002                         |
| 3     | 4        | 0.07                | 0.006                         | 0.006                         | <0.02               | 0.000                         | 0.002                         |
| 3     | 5        | 0.09                | 0.007                         | 0.007                         | <0.02               | 0.000                         | 0.002                         |
| 3     | 6        | 0.09                | 0.007                         | 0.007                         | <0.02               | 0.000                         | 0.002                         |
| 3     | 7        | 0.28                | 0.023                         | 0.023                         | 0.03                | 0.002                         | 0.002                         |
| 3     | 8        | 0.24                | 0.019                         | 0.019                         | 0.03                | 0.002                         | 0.002                         |
| 4     | 1        | 0.09                | 0.007                         | 0.007                         | <0.02               | 0.000                         | 0.002                         |
| 4     | 2        | 0.09                | 0.007                         | 0.007                         | <0.02               | 0.000                         | 0.002                         |
| 4     | 3        | 0.09                | 0.007                         | 0.007                         | <0.02               | 0.000                         | 0.002                         |
| 4     | 4        | 0.07                | 0.006                         | 0.006                         | <0.02               | 0.000                         | 0.002                         |
| 4     | 5        | 0.07                | 0.006                         | 0.006                         | <0.02               | 0.000                         | 0.002                         |
| 4     | 6        | 0.10                | 0.008                         | 0.008                         | <0.02               | 0.000                         | 0.002                         |
| 4     | 7        | 0.30                | 0.024                         | 0.024                         | <0.02               | 0.000                         | 0.002                         |
| 4     | 8        | 0.24                | 0.020                         | 0.020                         | <0.02               | 0.000                         | 0.002                         |
| 5     | 1        | 0.10                | 0.008                         | 0.008                         | 0.03                | 0.002                         | 0.002                         |
| 5     | 2        | 0.08                | 0.007                         | 0.007                         | 0.02                | 0.002                         | 0.002                         |
| 5     | 3        | 0.09                | 0.008                         | 0.008                         | 0.02                | 0.002                         | 0.002                         |
| 5     | 4        | 0.07                | 0.005                         | 0.005                         | 0.03                | 0.002                         | 0.002                         |
| 5     | 5        | <0.06               | 0.0                           | 0.005                         | 0.05                | 0.004                         | 0.004                         |
| 5     | 6        | 0.08                | 0.006                         | 0.006                         | 0.04                | 0.003                         | 0.003                         |
| 5     | 7        | 0.29                | 0.023                         | 0.023                         | 0.06                | 0.004                         | 0.004                         |
| 5     | 8        | 0.25                | 0.020                         | 0.020                         | 0.05                | 0.004                         | 0.004                         |
|       |          |                     | Σ min                         | Σ max                         |                     | Σ min                         | Σ max                         |
| 1     |          |                     | 0.074                         | 0.074                         |                     | 0.002                         | 0.013                         |
| 2     |          |                     | 0.083                         | 0.083                         |                     | 0.000                         | 0.013                         |
| 3     |          |                     | 0.081                         | 0.081                         |                     | 0.005                         | 0.014                         |
| 4     |          |                     | 0.085                         | 0.085                         |                     | 0.000                         | 0.013                         |
| 5     |          |                     | 0.077                         | 0.082                         |                     | 0.023                         | 0.023                         |
| Mean  |          |                     | 0.080                         | 0.081                         |                     | 0.006                         | 0.015                         |
| SD    |          |                     | 0.004                         | 0.004                         |                     | 0.010                         | 0.005                         |

**Table F.** Continued Granite.

| Stone | Fraction | LAB 1<br>Se<br>µg/l | min<br>r<br>mg/m <sup>2</sup> | max<br>r<br>mg/m <sup>2</sup> | LAB 2<br>Se<br>µg/l | min<br>r<br>mg/m <sup>2</sup> | max<br>r<br>mg/m <sup>2</sup> |
|-------|----------|---------------------|-------------------------------|-------------------------------|---------------------|-------------------------------|-------------------------------|
| 1     | 1        | <0.04               | 0.000                         | 0.003                         | <0.05               | 0.000                         | 0.004                         |
| 1     | 2        | <0.04               | 0.000                         | 0.003                         | <0.05               | 0.000                         | 0.004                         |
| 1     | 3        | <0.04               | 0.000                         | 0.003                         | <0.05               | 0.000                         | 0.004                         |
| 1     | 4        | <0.04               | 0.000                         | 0.003                         | <0.05               | 0.000                         | 0.004                         |
| 1     | 5        | <0.04               | 0.000                         | 0.003                         | <0.05               | 0.000                         | 0.004                         |
| 1     | 6        | <0.04               | 0.000                         | 0.003                         | <0.05               | 0.000                         | 0.004                         |
| 1     | 7        | <0.04               | 0.000                         | 0.003                         | <0.05               | 0.000                         | 0.004                         |
| 1     | 8        | <0.04               | 0.000                         | 0.003                         | <0.05               | 0.000                         | 0.004                         |
| 2     | 1        | <0.04               | 0.000                         | 0.003                         | <0.05               | 0.000                         | 0.004                         |
| 2     | 2        | <0.04               | 0.000                         | 0.003                         | <0.05               | 0.000                         | 0.004                         |
| 2     | 3        | <0.04               | 0.000                         | 0.003                         | <0.05               | 0.000                         | 0.004                         |
| 2     | 4        | <0.04               | 0.000                         | 0.003                         | <0.05               | 0.000                         | 0.004                         |
| 2     | 5        | <0.04               | 0.000                         | 0.003                         | <0.05               | 0.000                         | 0.004                         |
| 2     | 6        | <0.04               | 0.000                         | 0.003                         | <0.05               | 0.000                         | 0.004                         |
| 2     | 7        | <0.04               | 0.000                         | 0.003                         | <0.05               | 0.000                         | 0.004                         |
| 2     | 8        | <0.04               | 0.000                         | 0.003                         | <0.05               | 0.000                         | 0.004                         |
| 3     | 1        | <0.04               | 0.000                         | 0.003                         | <0.05               | 0.000                         | 0.004                         |
| 3     | 2        | <0.04               | 0.000                         | 0.003                         | <0.05               | 0.000                         | 0.004                         |
| 3     | 3        | <0.04               | 0.000                         | 0.003                         | <0.05               | 0.000                         | 0.004                         |
| 3     | 4        | <0.04               | 0.000                         | 0.003                         | <0.05               | 0.000                         | 0.004                         |
| 3     | 5        | <0.04               | 0.000                         | 0.003                         | <0.05               | 0.000                         | 0.004                         |
| 3     | 6        | <0.04               | 0.000                         | 0.003                         | <0.05               | 0.000                         | 0.004                         |
| 3     | 7        | <0.04               | 0.000                         | 0.003                         | <0.05               | 0.000                         | 0.004                         |
| 3     | 8        | <0.04               | 0.000                         | 0.003                         | <0.05               | 0.000                         | 0.004                         |
| 4     | 1        | <0.04               | 0.000                         | 0.003                         | <0.05               | 0.000                         | 0.004                         |
| 4     | 2        | <0.04               | 0.000                         | 0.003                         | <0.05               | 0.000                         | 0.004                         |
| 4     | 3        | <0.04               | 0.000                         | 0.003                         | <0.05               | 0.000                         | 0.004                         |
| 4     | 4        | <0.04               | 0.000                         | 0.003                         | <0.05               | 0.000                         | 0.004                         |
| 4     | 5        | <0.04               | 0.000                         | 0.003                         | <0.05               | 0.000                         | 0.004                         |
| 4     | 6        | <0.04               | 0.000                         | 0.003                         | <0.05               | 0.000                         | 0.004                         |
| 4     | 7        | <0.04               | 0.000                         | 0.003                         | <0.05               | 0.000                         | 0.004                         |
| 4     | 8        | <0.04               | 0.000                         | 0.003                         | <0.05               | 0.000                         | 0.004                         |
| 5     | 1        | <0.04               | 0.000                         | 0.003                         | <0.05               | 0.000                         | 0.004                         |
| 5     | 2        | <0.04               | 0.000                         | 0.003                         | <0.05               | 0.000                         | 0.004                         |
| 5     | 3        | <0.04               | 0.000                         | 0.003                         | <0.05               | 0.000                         | 0.004                         |
| 5     | 4        | <0.04               | 0.000                         | 0.003                         | <0.05               | 0.000                         | 0.004                         |
| 5     | 5        | <0.04               | 0.000                         | 0.003                         | <0.05               | 0.000                         | 0.004                         |
| 5     | 6        | <0.04               | 0.000                         | 0.003                         | <0.05               | 0.000                         | 0.004                         |
| 5     | 7        | <0.04               | 0.000                         | 0.003                         | <0.05               | 0.000                         | 0.004                         |
| 5     | 8        | <0.04               | 0.000                         | 0.003                         | <0.05               | 0.000                         | 0.004                         |
|       |          |                     | Σ min                         | Σ max                         |                     | Σ min                         | Σ max                         |
| 1     |          |                     | 0.000                         | 0.026                         |                     | 0.000                         | 0.032                         |
| 2     |          |                     | 0.000                         | 0.026                         |                     | 0.000                         | 0.032                         |
| 3     |          |                     | 0.000                         | 0.026                         |                     | 0.000                         | 0.032                         |
| 4     |          |                     | 0.000                         | 0.026                         |                     | 0.000                         | 0.032                         |
| 5     |          |                     | 0.000                         | 0.026                         |                     | 0.000                         | 0.032                         |
| Mean  |          |                     | 0.000                         | 0.026                         |                     | 0.000                         | 0.032                         |
| SD    |          |                     | 0.000                         | 0.000                         |                     | 0.000                         | 0.000                         |

**Table F.** Continued Granite.

| Stone | Fraction | LAB 1<br>Sn<br>µg/l | min<br>r<br>mg/m <sup>2</sup> | max<br>r<br>mg/m <sup>2</sup> | LAB 2<br>Sn<br>µg/l | min<br>r<br>mg/m <sup>2</sup> | max<br>r<br>mg/m <sup>2</sup> |
|-------|----------|---------------------|-------------------------------|-------------------------------|---------------------|-------------------------------|-------------------------------|
| 1     | 1        | 0.28                | 0.022                         | 0.022                         | <0.03               | 0.000                         | 0.002                         |
| 1     | 2        | 0.28                | 0.022                         | 0.022                         | <0.03               | 0.000                         | 0.002                         |
| 1     | 3        | 0.36                | 0.029                         | 0.029                         | <0.03               | 0.000                         | 0.002                         |
| 1     | 4        | 0.25                | 0.020                         | 0.020                         | <0.03               | 0.000                         | 0.002                         |
| 1     | 5        | 0.34                | 0.027                         | 0.027                         | <0.03               | 0.000                         | 0.002                         |
| 1     | 6        | 0.23                | 0.019                         | 0.019                         | <0.03               | 0.000                         | 0.002                         |
| 1     | 7        | 0.11                | 0.009                         | 0.009                         | <0.03               | 0.000                         | 0.002                         |
| 1     | 8        | 0.16                | 0.013                         | 0.013                         | <0.03               | 0.000                         | 0.002                         |
| 2     | 1        | 0.18                | 0.015                         | 0.015                         | <0.03               | 0.000                         | 0.002                         |
| 2     | 2        | 0.15                | 0.012                         | 0.012                         | <0.03               | 0.000                         | 0.002                         |
| 2     | 3        | 0.21                | 0.017                         | 0.017                         | <0.03               | 0.000                         | 0.002                         |
| 2     | 4        | 0.15                | 0.012                         | 0.012                         | <0.03               | 0.000                         | 0.002                         |
| 2     | 5        | 0.19                | 0.015                         | 0.015                         | <0.03               | 0.000                         | 0.002                         |
| 2     | 6        | 0.16                | 0.013                         | 0.013                         | <0.03               | 0.000                         | 0.002                         |
| 2     | 7        | 0.10                | 0.008                         | 0.008                         | <0.03               | 0.000                         | 0.002                         |
| 2     | 8        | 0.14                | 0.011                         | 0.011                         | <0.03               | 0.000                         | 0.002                         |
| 3     | 1        | 0.14                | 0.011                         | 0.011                         | <0.03               | 0.000                         | 0.002                         |
| 3     | 2        | 0.09                | 0.007                         | 0.007                         | <0.03               | 0.000                         | 0.002                         |
| 3     | 3        | 0.12                | 0.010                         | 0.010                         | <0.03               | 0.000                         | 0.002                         |
| 3     | 4        | 0.10                | 0.008                         | 0.008                         | <0.03               | 0.000                         | 0.002                         |
| 3     | 5        | 0.11                | 0.009                         | 0.009                         | <0.03               | 0.000                         | 0.002                         |
| 3     | 6        | 0.09                | 0.007                         | 0.007                         | <0.03               | 0.000                         | 0.002                         |
| 3     | 7        | 0.06                | 0.005                         | 0.005                         | <0.03               | 0.000                         | 0.002                         |
| 3     | 8        | 0.07                | 0.006                         | 0.006                         | <0.03               | 0.000                         | 0.002                         |
| 4     | 1        | 0.15                | 0.012                         | 0.012                         | <0.03               | 0.000                         | 0.002                         |
| 4     | 2        | 0.10                | 0.008                         | 0.008                         | <0.03               | 0.000                         | 0.002                         |
| 4     | 3        | 0.13                | 0.011                         | 0.011                         | <0.03               | 0.000                         | 0.002                         |
| 4     | 4        | 0.10                | 0.008                         | 0.008                         | <0.03               | 0.000                         | 0.002                         |
| 4     | 5        | 0.12                | 0.010                         | 0.010                         | <0.03               | 0.000                         | 0.002                         |
| 4     | 6        | 0.11                | 0.009                         | 0.009                         | <0.03               | 0.000                         | 0.002                         |
| 4     | 7        | 0.08                | 0.007                         | 0.007                         | <0.03               | 0.000                         | 0.002                         |
| 4     | 8        | 0.09                | 0.007                         | 0.007                         | <0.03               | 0.000                         | 0.002                         |
| 5     | 1        | 0.33                | 0.027                         | 0.027                         | <0.03               | 0.000                         | 0.002                         |
| 5     | 2        | 0.49                | 0.040                         | 0.040                         | <0.03               | 0.000                         | 0.002                         |
| 5     | 3        | 0.56                | 0.044                         | 0.044                         | <0.03               | 0.000                         | 0.002                         |
| 5     | 4        | 0.39                | 0.031                         | 0.031                         | <0.03               | 0.000                         | 0.002                         |
| 5     | 5        | 0.19                | 0.015                         | 0.015                         | <0.03               | 0.000                         | 0.002                         |
| 5     | 6        | 0.11                | 0.009                         | 0.009                         | <0.03               | 0.000                         | 0.002                         |
| 5     | 7        | 0.25                | 0.020                         | 0.020                         | <0.03               | 0.000                         | 0.002                         |
| 5     | 8        | 0.17                | 0.014                         | 0.014                         | <0.03               | 0.000                         | 0.002                         |
|       |          |                     | Σ min                         | Σ max                         |                     | Σ min                         | Σ max                         |
| 1     |          |                     | 0.161                         | 0.161                         |                     | 0.000                         | 0.019                         |
| 2     |          |                     | 0.103                         | 0.103                         |                     | 0.000                         | 0.019                         |
| 3     |          |                     | 0.063                         | 0.063                         |                     | 0.000                         | 0.019                         |
| 4     |          |                     | 0.072                         | 0.072                         |                     | 0.000                         | 0.019                         |
| 5     |          |                     | 0.199                         | 0.199                         |                     | 0.000                         | 0.019                         |
| Mean  |          |                     | 0.120                         | 0.120                         |                     | 0.000                         | 0.019                         |
| SD    |          |                     | 0.059                         | 0.059                         |                     | 0.000                         | 0.000                         |

**Table F.** Continued Granite.

| Stone | Fraction | LAB 1<br>Sr<br>µg/l | min<br>r<br>mg/m <sup>2</sup> | max<br>r<br>mg/m <sup>2</sup> | LAB 2<br>Sr<br>µg/l | min<br>r<br>mg/m <sup>2</sup> | max<br>r<br>mg/m <sup>2</sup> |
|-------|----------|---------------------|-------------------------------|-------------------------------|---------------------|-------------------------------|-------------------------------|
| 1     | 1        | 6.52                | 0.521                         | 0.521                         | 3.10                | 0.248                         | 0.248                         |
| 1     | 2        | 7.16                | 0.573                         | 0.573                         | 3.07                | 0.245                         | 0.245                         |
| 1     | 3        | 8.00                | 0.640                         | 0.640                         | 3.07                | 0.245                         | 0.245                         |
| 1     | 4        | 7.67                | 0.613                         | 0.613                         | 3.06                | 0.245                         | 0.245                         |
| 1     | 5        | 8.46                | 0.677                         | 0.677                         | 3.08                | 0.247                         | 0.247                         |
| 1     | 6        | 8.21                | 0.657                         | 0.657                         | 3.05                | 0.244                         | 0.244                         |
| 1     | 7        | 9.47                | 0.757                         | 0.757                         | 3.10                | 0.248                         | 0.248                         |
| 1     | 8        | 10.00               | 0.800                         | 0.800                         | 3.13                | 0.250                         | 0.250                         |
| 2     | 1        | 7.67                | 0.614                         | 0.614                         | 3.07                | 0.246                         | 0.246                         |
| 2     | 2        | 6.93                | 0.554                         | 0.554                         | 3.20                | 0.256                         | 0.256                         |
| 2     | 3        | 7.11                | 0.569                         | 0.569                         | 3.29                | 0.263                         | 0.263                         |
| 2     | 4        | 6.90                | 0.552                         | 0.552                         | 3.39                | 0.271                         | 0.271                         |
| 2     | 5        | 8.43                | 0.674                         | 0.674                         | 4.19                | 0.335                         | 0.335                         |
| 2     | 6        | 7.34                | 0.587                         | 0.587                         | 4.45                | 0.355                         | 0.355                         |
| 2     | 7        | 8.06                | 0.645                         | 0.645                         | 5.76                | 0.461                         | 0.461                         |
| 2     | 8        | 7.98                | 0.638                         | 0.638                         | 5.96                | 0.477                         | 0.477                         |
| 3     | 1        | 7.20                | 0.576                         | 0.576                         | 3.05                | 0.244                         | 0.244                         |
| 3     | 2        | 7.38                | 0.590                         | 0.590                         | 3.08                | 0.246                         | 0.246                         |
| 3     | 3        | 7.34                | 0.587                         | 0.587                         | 3.06                | 0.245                         | 0.245                         |
| 3     | 4        | 7.28                | 0.582                         | 0.582                         | 3.06                | 0.245                         | 0.245                         |
| 3     | 5        | 8.00                | 0.640                         | 0.640                         | 3.12                | 0.250                         | 0.250                         |
| 3     | 6        | 8.49                | 0.679                         | 0.679                         | 3.11                | 0.249                         | 0.249                         |
| 3     | 7        | 8.72                | 0.698                         | 0.698                         | 3.41                | 0.273                         | 0.273                         |
| 3     | 8        | 7.70                | 0.616                         | 0.616                         | 3.45                | 0.276                         | 0.276                         |
| 4     | 1        | 6.76                | 0.541                         | 0.541                         | 3.24                | 0.259                         | 0.259                         |
| 4     | 2        | 6.64                | 0.531                         | 0.531                         | 3.61                | 0.288                         | 0.288                         |
| 4     | 3        | 2.48                | 0.199                         | 0.199                         | 3.86                | 0.308                         | 0.308                         |
| 4     | 4        | 2.39                | 0.191                         | 0.191                         | 4.03                | 0.322                         | 0.322                         |
| 4     | 5        | 2.76                | 0.221                         | 0.221                         | 5.40                | 0.432                         | 0.432                         |
| 4     | 6        | 8.02                | 0.642                         | 0.642                         | 5.96                | 0.476                         | 0.476                         |
| 4     | 7        | 7.82                | 0.625                         | 0.625                         | 8.22                | 0.657                         | 0.657                         |
| 4     | 8        | 5.74                | 0.459                         | 0.459                         | 8.58                | 0.686                         | 0.686                         |
| 5     | 1        | 6.32                | 0.505                         | 0.505                         | 3.05                | 0.244                         | 0.244                         |
| 5     | 2        | 6.72                | 0.538                         | 0.538                         | 3.07                | 0.245                         | 0.245                         |
| 5     | 3        | 7.03                | 0.562                         | 0.562                         | 3.07                | 0.245                         | 0.245                         |
| 5     | 4        | 3.96                | 0.317                         | 0.317                         | 3.06                | 0.245                         | 0.245                         |
| 5     | 5        | 2.15                | 0.172                         | 0.172                         | 3.23                | 0.258                         | 0.258                         |
| 5     | 6        | 3.02                | 0.242                         | 0.242                         | 3.26                | 0.260                         | 0.260                         |
| 5     | 7        | 7.77                | 0.622                         | 0.622                         | 3.59                | 0.287                         | 0.287                         |
| 5     | 8        | 8.58                | 0.686                         | 0.686                         | 3.62                | 0.289                         | 0.289                         |
|       |          |                     | Σ min                         | Σ max                         |                     | Σ min                         | Σ max                         |
| 1     |          |                     | 5.237                         | 5.237                         |                     | 1.972                         | 1.972                         |
| 2     |          |                     | 4.833                         | 4.833                         |                     | 2.662                         | 2.662                         |
| 3     |          |                     | 4.968                         | 4.968                         |                     | 2.027                         | 2.027                         |
| 4     |          |                     | 3.409                         | 3.409                         |                     | 3.428                         | 3.428                         |
| 5     |          |                     | 3.643                         | 3.643                         |                     | 2.073                         | 2.073                         |
| Mean  |          |                     | 4.418                         | 4.418                         |                     | 2.433                         | 2.433                         |
| SD    |          |                     | 0.831                         | 0.831                         |                     | 0.622                         | 0.622                         |

**Table F.** Continued Granite.

| Stone | Fraction | LAB 1<br>U<br>µg/l | min<br>r<br>mg/m <sup>2</sup> | max<br>r<br>mg/m <sup>2</sup> | LAB 2<br>U<br>µg/l | min<br>r<br>mg/m <sup>2</sup> | max<br>r<br>mg/m <sup>2</sup> |
|-------|----------|--------------------|-------------------------------|-------------------------------|--------------------|-------------------------------|-------------------------------|
| 1     | 1        | 0.04               | 0.004                         | 0.004                         | 0.04               | 0.003                         | 0.003                         |
| 1     | 2        | <0.04              | 0.000                         | 0.003                         | 0.02               | 0.001                         | 0.001                         |
| 1     | 3        | <0.04              | 0.000                         | 0.003                         | 0.01               | 0.001                         | 0.001                         |
| 1     | 4        | 0.04               | 0.003                         | 0.003                         | 0.01               | 0.001                         | 0.001                         |
| 1     | 5        | 0.06               | 0.005                         | 0.005                         | 0.01               | 0.001                         | 0.001                         |
| 1     | 6        | 0.06               | 0.004                         | 0.004                         | 0.01               | 0.001                         | 0.001                         |
| 1     | 7        | 0.20               | 0.016                         | 0.016                         | 0.02               | 0.001                         | 0.001                         |
| 1     | 8        | 0.14               | 0.011                         | 0.011                         | 0.02               | 0.001                         | 0.001                         |
| 2     | 1        | 0.07               | 0.005                         | 0.005                         | 0.06               | 0.004                         | 0.004                         |
| 2     | 2        | 0.06               | 0.005                         | 0.005                         | 0.08               | 0.006                         | 0.006                         |
| 2     | 3        | 0.07               | 0.006                         | 0.006                         | 0.09               | 0.007                         | 0.007                         |
| 2     | 4        | 0.06               | 0.005                         | 0.005                         | 0.12               | 0.009                         | 0.009                         |
| 2     | 5        | 0.13               | 0.010                         | 0.010                         | 0.23               | 0.018                         | 0.018                         |
| 2     | 6        | 0.15               | 0.012                         | 0.012                         | 0.21               | 0.017                         | 0.017                         |
| 2     | 7        | 0.30               | 0.024                         | 0.024                         | 0.38               | 0.030                         | 0.030                         |
| 2     | 8        | 0.41               | 0.032                         | 0.032                         | 0.35               | 0.028                         | 0.028                         |
| 3     | 1        | 0.06               | 0.004                         | 0.004                         | 0.02               | 0.002                         | 0.002                         |
| 3     | 2        | 0.04               | 0.003                         | 0.003                         | 0.02               | 0.002                         | 0.002                         |
| 3     | 3        | 0.05               | 0.004                         | 0.004                         | 0.02               | 0.002                         | 0.002                         |
| 3     | 4        | 0.06               | 0.005                         | 0.005                         | 0.02               | 0.001                         | 0.001                         |
| 3     | 5        | 0.09               | 0.007                         | 0.007                         | 0.03               | 0.002                         | 0.002                         |
| 3     | 6        | 0.13               | 0.010                         | 0.010                         | 0.03               | 0.003                         | 0.003                         |
| 3     | 7        | 0.25               | 0.020                         | 0.020                         | 0.06               | 0.005                         | 0.005                         |
| 3     | 8        | 0.14               | 0.011                         | 0.011                         | 0.06               | 0.005                         | 0.005                         |
| 4     | 1        | 0.09               | 0.007                         | 0.007                         | 0.07               | 0.006                         | 0.006                         |
| 4     | 2        | 0.06               | 0.005                         | 0.005                         | 0.11               | 0.009                         | 0.009                         |
| 4     | 3        | 0.07               | 0.006                         | 0.006                         | 0.15               | 0.012                         | 0.012                         |
| 4     | 4        | 0.06               | 0.005                         | 0.005                         | 0.22               | 0.017                         | 0.017                         |
| 4     | 5        | 0.12               | 0.010                         | 0.010                         | 0.71               | 0.057                         | 0.057                         |
| 4     | 6        | 0.14               | 0.011                         | 0.011                         | 0.71               | 0.057                         | 0.057                         |
| 4     | 7        | 0.19               | 0.015                         | 0.015                         | 1.42               | 0.113                         | 0.113                         |
| 4     | 8        | 0.25               | 0.020                         | 0.020                         | 1.54               | 0.123                         | 0.123                         |
| 5     | 1        | 0.12               | 0.009                         | 0.009                         | 0.14               | 0.011                         | 0.011                         |
| 5     | 2        | 0.08               | 0.006                         | 0.006                         | 0.05               | 0.004                         | 0.004                         |
| 5     | 3        | 0.08               | 0.007                         | 0.007                         | 0.06               | 0.005                         | 0.005                         |
| 5     | 4        | 0.06               | 0.004                         | 0.004                         | 0.08               | 0.007                         | 0.007                         |
| 5     | 5        | 0.22               | 0.018                         | 0.018                         | 0.12               | 0.009                         | 0.009                         |
| 5     | 6        | 0.16               | 0.013                         | 0.013                         | 0.13               | 0.010                         | 0.010                         |
| 5     | 7        | 0.34               | 0.027                         | 0.027                         | 0.22               | 0.018                         | 0.018                         |
| 5     | 8        | 0.50               | 0.040                         | 0.040                         | 0.20               | 0.016                         | 0.016                         |
|       |          |                    | Σ min                         | Σ max                         |                    | Σ min                         | Σ max                         |
| 1     |          |                    | 0.043                         | 0.049                         |                    | 0.011                         | 0.011                         |
| 2     |          |                    | 0.100                         | 0.100                         |                    | 0.120                         | 0.120                         |
| 3     |          |                    | 0.065                         | 0.065                         |                    | 0.021                         | 0.021                         |
| 4     |          |                    | 0.079                         | 0.079                         |                    | 0.394                         | 0.394                         |
| 5     |          |                    | 0.124                         | 0.124                         |                    | 0.081                         | 0.081                         |
| Mean  |          |                    | 0.082                         | 0.084                         |                    | 0.125                         | 0.125                         |
| SD    |          |                    | 0.031                         | 0.029                         |                    | 0.156                         | 0.156                         |

**Table F.** Continued Granite.

| Stone | Fraction | LAB 1<br>V<br>µg/l | min<br>r<br>mg/m <sup>2</sup> | max<br>r<br>mg/m <sup>2</sup> | LAB 2<br>V<br>µg/l | min<br>r<br>mg/m <sup>2</sup> | max<br>r<br>mg/m <sup>2</sup> |
|-------|----------|--------------------|-------------------------------|-------------------------------|--------------------|-------------------------------|-------------------------------|
| 1     | 1        | 0.03               | 0.002                         | 0.002                         | 0.04               | 0.003                         | 0.003                         |
| 1     | 2        | <0.02              | 0.0                           | 0.002                         | 0.08               | 0.007                         | 0.007                         |
| 1     | 3        | <0.02              | 0.0                           | 0.002                         | 0.03               | 0.002                         | 0.002                         |
| 1     | 4        | <0.02              | 0.0                           | 0.002                         | 0.03               | 0.002                         | 0.002                         |
| 1     | 5        | <0.02              | 0.0                           | 0.002                         | 0.05               | 0.004                         | 0.004                         |
| 1     | 6        | <0.02              | 0.0                           | 0.002                         | <0.02              | 0.0                           | 0.002                         |
| 1     | 7        | 0.07               | 0.005                         | 0.005                         | <0.02              | 0.0                           | 0.002                         |
| 1     | 8        | 0.03               | 0.002                         | 0.002                         | <0.02              | 0.0                           | 0.002                         |
| 2     | 1        | 0.05               | 0.004                         | 0.004                         | <0.02              | 0.0                           | 0.002                         |
| 2     | 2        | <0.02              | 0.0                           | 0.002                         | <0.02              | 0.0                           | 0.002                         |
| 2     | 3        | <0.02              | 0.0                           | 0.002                         | <0.02              | 0.0                           | 0.002                         |
| 2     | 4        | <0.02              | 0.0                           | 0.002                         | 0.02               | 0.002                         | 0.002                         |
| 2     | 5        | <0.02              | 0.0                           | 0.002                         | 0.03               | 0.003                         | 0.003                         |
| 2     | 6        | <0.02              | 0.0                           | 0.002                         | <0.02              | 0.0                           | 0.002                         |
| 2     | 7        | 0.04               | 0.003                         | 0.003                         | <0.02              | 0.0                           | 0.002                         |
| 2     | 8        | <0.02              | 0.0                           | 0.002                         | <0.02              | 0.0                           | 0.002                         |
| 3     | 1        | 0.04               | 0.003                         | 0.003                         | <0.02              | 0.0                           | 0.002                         |
| 3     | 2        | <0.02              | 0.0                           | 0.002                         | <0.02              | 0.0                           | 0.002                         |
| 3     | 3        | <0.02              | 0.0                           | 0.002                         | <0.02              | 0.0                           | 0.002                         |
| 3     | 4        | <0.02              | 0.0                           | 0.002                         | <0.02              | 0.0                           | 0.002                         |
| 3     | 5        | <0.02              | 0.0                           | 0.002                         | 0.05               | 0.004                         | 0.004                         |
| 3     | 6        | <0.02              | 0.0                           | 0.002                         | <0.02              | 0.0                           | 0.002                         |
| 3     | 7        | 0.04               | 0.003                         | 0.003                         | <0.02              | 0.0                           | 0.002                         |
| 3     | 8        | <0.02              | 0.0                           | 0.002                         | <0.02              | 0.0                           | 0.002                         |
| 4     | 1        | 0.05               | 0.004                         | 0.004                         | <0.02              | 0.0                           | 0.002                         |
| 4     | 2        | <0.02              | 0.0                           | 0.002                         | <0.02              | 0.0                           | 0.002                         |
| 4     | 3        | <0.02              | 0.0                           | 0.002                         | <0.02              | 0.0                           | 0.002                         |
| 4     | 4        | <0.02              | 0.0                           | 0.002                         | 0.02               | 0.002                         | 0.002                         |
| 4     | 5        | <0.02              | 0.0                           | 0.002                         | 0.04               | 0.003                         | 0.003                         |
| 4     | 6        | <0.02              | 0.0                           | 0.002                         | <0.02              | 0.0                           | 0.002                         |
| 4     | 7        | 0.03               | 0.003                         | 0.003                         | <0.02              | 0.0                           | 0.002                         |
| 4     | 8        | <0.02              | 0.0                           | 0.002                         | <0.02              | 0.0                           | 0.002                         |
| 5     | 1        | 0.04               | 0.003                         | 0.003                         | <0.02              | 0.0                           | 0.002                         |
| 5     | 2        | <0.02              | 0.0                           | 0.002                         | <0.02              | 0.0                           | 0.002                         |
| 5     | 3        | 0.03               | 0.002                         | 0.002                         | <0.02              | 0.0                           | 0.002                         |
| 5     | 4        | <0.02              | 0.0                           | 0.002                         | 0.02               | 0.002                         | 0.002                         |
| 5     | 5        | 0.23               | 0.018                         | 0.018                         | 0.04               | 0.003                         | 0.003                         |
| 5     | 6        | <0.02              | 0.0                           | 0.002                         | <0.02              | 0.0                           | 0.002                         |
| 5     | 7        | 0.75               | 0.060                         | 0.060                         | <0.02              | 0.0                           | 0.002                         |
| 5     | 8        | 0.02               | 0.002                         | 0.002                         | <0.02              | 0.0                           | 0.002                         |
|       |          |                    | Σ min                         | Σ max                         |                    | Σ min                         | Σ max                         |
| 1     |          |                    | 0.010                         | 0.018                         |                    | 0.02                          | 0.02                          |
| 2     |          |                    | 0.007                         | 0.017                         |                    | 0.00                          | 0.01                          |
| 3     |          |                    | 0.006                         | 0.016                         |                    | 0.00                          | 0.02                          |
| 4     |          |                    | 0.007                         | 0.016                         |                    | 0.00                          | 0.01                          |
| 5     |          |                    | 0.085                         | 0.090                         |                    | 0.00                          | 0.01                          |
| Mean  |          |                    | 0.023                         | 0.031                         |                    | 0.01                          | 0.02                          |
| SD    |          |                    | 0.035                         | 0.033                         |                    | 0.01                          | 0.00                          |

**Table F.** Continued Granite.

| Stone | Fraction | LAB 1<br>Zn<br>µg/l | min<br>r<br>mg/m <sup>2</sup> | max<br>r<br>mg/m <sup>2</sup> | LAB 2<br>Zn<br>µg/l | min<br>r<br>mg/m <sup>2</sup> | max<br>r<br>mg/m <sup>2</sup> |
|-------|----------|---------------------|-------------------------------|-------------------------------|---------------------|-------------------------------|-------------------------------|
| 1     | 1        | 255                 | 20.40                         | 20.40                         | 7.52                | 0.602                         | 0.602                         |
| 1     | 2        | 259                 | 20.75                         | 20.75                         | 53.42               | 4.275                         | 4.275                         |
| 1     | 3        | 361                 | 28.90                         | 28.90                         | 3.74                | 0.299                         | 0.299                         |
| 1     | 4        | 449                 | 35.92                         | 35.92                         | 3.88                | 0.310                         | 0.310                         |
| 1     | 5        | 451                 | 36.08                         | 36.08                         | 27.05               | 2.165                         | 2.165                         |
| 1     | 6        | 318                 | 25.43                         | 25.43                         | 0.27                | 0.021                         | 0.021                         |
| 1     | 7        | 348                 | 27.87                         | 27.87                         | 0.41                | 0.033                         | 0.033                         |
| 1     | 8        | 334                 | 26.67                         | 26.67                         | 0.20                | 0.016                         | 0.016                         |
| 2     | 1        | 273                 | 21.81                         | 21.81                         | 0.31                | 0.025                         | 0.025                         |
| 2     | 2        | 274                 | 21.94                         | 21.94                         | 0.81                | 0.065                         | 0.065                         |
| 2     | 3        | 268                 | 21.45                         | 21.45                         | 0.36                | 0.029                         | 0.029                         |
| 2     | 4        | 395                 | 31.56                         | 31.56                         | 3.57                | 0.285                         | 0.285                         |
| 2     | 5        | 470                 | 37.58                         | 37.58                         | 22.27               | 1.781                         | 1.781                         |
| 2     | 6        | 287                 | 22.93                         | 22.93                         | 0.33                | 0.026                         | 0.026                         |
| 2     | 7        | 312                 | 24.98                         | 24.98                         | 0.24                | 0.019                         | 0.019                         |
| 2     | 8        | 249                 | 19.94                         | 19.94                         | 0.11                | 0.009                         | 0.009                         |
| 3     | 1        | 390                 | 31.18                         | 31.18                         | 0.53                | 0.043                         | 0.043                         |
| 3     | 2        | 283                 | 22.62                         | 22.62                         | 1.06                | 0.085                         | 0.085                         |
| 3     | 3        | 421                 | 33.68                         | 33.68                         | 0.16                | 0.013                         | 0.013                         |
| 3     | 4        | 307                 | 24.52                         | 24.52                         | 3.98                | 0.318                         | 0.318                         |
| 3     | 5        | 433                 | 34.62                         | 34.62                         | 37.09               | 2.967                         | 2.967                         |
| 3     | 6        | 459                 | 36.73                         | 36.73                         | 0.25                | 0.020                         | 0.020                         |
| 3     | 7        | 295                 | 23.56                         | 23.56                         | 0.23                | 0.019                         | 0.019                         |
| 3     | 8        | 219                 | 17.53                         | 17.53                         | 0.20                | 0.016                         | 0.016                         |
| 4     | 1        | 276                 | 22.05                         | 22.05                         | 0.39                | 0.031                         | 0.031                         |
| 4     | 2        | 416                 | 33.24                         | 33.24                         | 0.40                | 0.032                         | 0.032                         |
| 4     | 3        | 105                 | 8.40                          | 8.40                          | 0.16                | 0.013                         | 0.013                         |
| 4     | 4        | 175                 | 14.03                         | 14.03                         | 4.70                | 0.375                         | 0.375                         |
| 4     | 5        | 144                 | 11.49                         | 11.49                         | 19.11               | 1.527                         | 1.527                         |
| 4     | 6        | 426                 | 34.08                         | 34.08                         | 0.21                | 0.017                         | 0.017                         |
| 4     | 7        | 339                 | 27.08                         | 27.08                         | 0.18                | 0.014                         | 0.014                         |
| 4     | 8        | 194                 | 15.53                         | 15.53                         | <0.11               | 0.000                         | 0.009                         |
| 5     | 1        | 393                 | 31.43                         | 31.43                         | 0.38                | 0.031                         | 0.031                         |
| 5     | 2        | 430                 | 34.38                         | 34.38                         | 0.56                | 0.045                         | 0.045                         |
| 5     | 3        | 292                 | 23.36                         | 23.36                         | 0.22                | 0.018                         | 0.018                         |
| 5     | 4        | 290                 | 23.18                         | 23.18                         | 2.87                | 0.229                         | 0.229                         |
| 5     | 5        | 96                  | 7.65                          | 7.65                          | 22.48               | 1.797                         | 1.797                         |
| 5     | 6        | 162                 | 12.93                         | 12.93                         | 0.22                | 0.017                         | 0.017                         |
| 5     | 7        | 283                 | 22.60                         | 22.60                         | 0.21                | 0.017                         | 0.017                         |
| 5     | 8        | 297                 | 23.72                         | 23.72                         | <0.11               | 0.000                         | 0.009                         |
|       |          |                     | Σ min                         | Σ max                         |                     | Σ min                         | Σ max                         |
| 1     |          |                     | 222                           | 222                           |                     | 7.721                         | 7.721                         |
| 2     |          |                     | 202                           | 202                           |                     | 2.238                         | 2.238                         |
| 3     |          |                     | 224                           | 224                           |                     | 3.480                         | 3.480                         |
| 4     |          |                     | 166                           | 166                           |                     | 2.010                         | 2.019                         |
| 5     |          |                     | 179                           | 179                           |                     | 2.154                         | 2.162                         |
| Mean  |          |                     | 199                           | 199                           |                     | 3.521                         | 3.524                         |
| SD    |          |                     | 25.9                          | 25.9                          |                     | 2.421                         | 2.418                         |

**Table G.** DSLT results CUS (LAB 1 DSLT contract laboratory, LAB 2 DSLT BfG, for CUS3 n=4)

| Stone | Fraction | LAB 1<br>CUS1 | min                    | max                    | LAB 2<br>CUS1 | min                    | max                    |
|-------|----------|---------------|------------------------|------------------------|---------------|------------------------|------------------------|
|       |          | Al<br>µg/l    | r<br>mg/m <sup>2</sup> | r<br>mg/m <sup>2</sup> | Al<br>µg/l    | r<br>mg/m <sup>2</sup> | r<br>mg/m <sup>2</sup> |
| 1     | 1        | <40.8         | 0.00                   | 3.26                   | <40.8         | 0.00                   | 3.26                   |
| 1     | 2        | <40.8         | 0.00                   | 3.26                   | <40.8         | 0.00                   | 3.26                   |
| 1     | 3        | <40.8         | 0.00                   | 3.26                   | <40.8         | 0.00                   | 3.26                   |
| 1     | 4        | <40.8         | 0.00                   | 3.26                   | <40.8         | 0.00                   | 3.26                   |
| 1     | 5        | <40.8         | 0.00                   | 3.26                   | <40.8         | 0.00                   | 3.26                   |
| 1     | 6        | <40.8         | 0.00                   | 3.26                   | <40.8         | 0.00                   | 3.26                   |
| 1     | 7        | <40.8         | 0.00                   | 3.26                   | <40.8         | 0.00                   | 3.26                   |
| 1     | 8        | <40.8         | 0.00                   | 3.26                   | <40.8         | 0.00                   | 3.26                   |
| 2     | 1        | <40.8         | 0.00                   | 3.26                   | <40.8         | 0.00                   | 3.26                   |
| 2     | 2        | <40.8         | 0.00                   | 3.26                   | <40.8         | 0.00                   | 3.26                   |
| 2     | 3        | <40.8         | 0.00                   | 3.26                   | <40.8         | 0.00                   | 3.26                   |
| 2     | 4        | <40.8         | 0.00                   | 3.26                   | <40.8         | 0.00                   | 3.26                   |
| 2     | 5        | <40.8         | 0.00                   | 3.26                   | <40.8         | 0.00                   | 3.26                   |
| 2     | 6        | <40.8         | 0.00                   | 3.26                   | <40.8         | 0.00                   | 3.26                   |
| 2     | 7        | 127           | 10.17                  | 10.17                  | <40.8         | 0.00                   | 10.17                  |
| 2     | 8        | <40.8         | 0.00                   | 3.26                   | <40.8         | 0.00                   | 3.26                   |
| 3     | 1        | <40.8         | 0.00                   | 3.26                   | <40.8         | 0.00                   | 3.26                   |
| 3     | 2        | <40.8         | 0.00                   | 3.26                   | <40.8         | 0.00                   | 3.26                   |
| 3     | 3        | <40.8         | 0.00                   | 3.26                   | <40.8         | 0.00                   | 3.26                   |
| 3     | 4        | <40.8         | 0.00                   | 3.26                   | <40.8         | 0.00                   | 3.26                   |
| 3     | 5        | <40.8         | 0.00                   | 3.26                   | <40.8         | 0.00                   | 3.26                   |
| 3     | 6        | <40.8         | 0.00                   | 3.26                   | <40.8         | 0.00                   | 3.26                   |
| 3     | 7        | <40.8         | 0.00                   | 3.26                   | <40.8         | 0.00                   | 3.26                   |
| 3     | 8        | <40.8         | 0.00                   | 3.26                   | <40.8         | 0.00                   | 3.26                   |
| 4     | 1        | <40.8         | 0.00                   | 3.26                   | <40.8         | 0.00                   | 3.26                   |
| 4     | 2        | <40.8         | 0.00                   | 3.26                   | <40.8         | 0.00                   | 3.26                   |
| 4     | 3        | <40.8         | 0.00                   | 3.26                   | <40.8         | 0.00                   | 3.26                   |
| 4     | 4        | <40.8         | 0.00                   | 3.26                   | <40.8         | 0.00                   | 3.26                   |
| 4     | 5        | <40.8         | 0.00                   | 3.26                   | <40.8         | 0.00                   | 3.26                   |
| 4     | 6        | <40.8         | 0.00                   | 3.26                   | <40.8         | 0.00                   | 3.26                   |
| 4     | 7        | <40.8         | 0.00                   | 3.26                   | <40.8         | 0.00                   | 3.26                   |
| 4     | 8        | <40.8         | 0.00                   | 3.26                   | 109           | 0.00                   | 3.26                   |
| 5     | 1        | <40.8         | 0.00                   | 3.26                   | <40.8         | 0.00                   | 3.26                   |
| 5     | 2        | <40.8         | 0.00                   | 3.26                   | <40.8         | 0.00                   | 3.26                   |
| 5     | 3        | <40.8         | 0.00                   | 3.26                   | <40.8         | 0.00                   | 3.26                   |
| 5     | 4        | <40.8         | 0.00                   | 3.26                   | <40.8         | 0.00                   | 3.26                   |
| 5     | 5        | <40.8         | 0.00                   | 3.26                   | <40.8         | 0.00                   | 3.26                   |
| 5     | 6        | <40.8         | 0.00                   | 3.26                   | <40.8         | 0.00                   | 3.26                   |
| 5     | 7        | <40.8         | 0.00                   | 3.26                   | <40.8         | 0.00                   | 3.26                   |
| 5     | 8        | <40.8         | 0.00                   | 3.26                   | <40.8         | 0.00                   | 3.26                   |
|       |          |               | Σ min                  | Σ max                  |               | Σ min                  | Σ max                  |
| 1     |          |               | 0.00                   | 26.11                  |               | 0.00                   | 25.55                  |
| 2     |          |               | 10.17                  | 33.02                  |               | 0.00                   | 25.59                  |
| 3     |          |               | 0.00                   | 26.11                  |               | 0.00                   | 25.59                  |
| 4     |          |               | 0.00                   | 26.11                  |               | 8.67                   | 31.05                  |
| 5     |          |               | 0.00                   | 26.11                  |               | 0.00                   | 25.63                  |
| Mean  |          |               | 2.03                   | 27.49                  |               | 1.73                   | 26.68                  |
| SD    |          |               | 4.55                   | 3.09                   |               | 3.88                   | 2.44                   |

**Table G.** Continued CUS.

| Stone | Fraction | LAB 2<br>CUS2 | min                    | max                    | LAB 2<br>CUS3 | min                    | max                    |
|-------|----------|---------------|------------------------|------------------------|---------------|------------------------|------------------------|
|       |          | Al<br>µg/l    | r<br>mg/m <sup>2</sup> | r<br>mg/m <sup>2</sup> | Al<br>µg/l    | r<br>mg/m <sup>2</sup> | r<br>mg/m <sup>2</sup> |
| 1     | 1        | <50           | 0.00                   | 4.00                   |               |                        |                        |
| 1     | 2        | <50           | 0.00                   | 4.00                   |               |                        |                        |
| 1     | 3        | <50           | 0.00                   | 4.00                   |               |                        |                        |
| 1     | 4        | <50           | 0.00                   | 4.00                   |               |                        |                        |
| 1     | 5        | <50           | 0.00                   | 4.00                   |               |                        |                        |
| 1     | 6        | <50           | 0.00                   | 4.00                   |               |                        |                        |
| 1     | 7        | <50           | 0.00                   | 4.00                   |               |                        |                        |
| 1     | 8        | <50           | 0.00                   | 4.00                   |               |                        |                        |
| 2     | 1        | <50           | 0.00                   | 4.00                   | <50           | 0.00                   | 4.01                   |
| 2     | 2        | <50           | 0.00                   | 4.00                   | <50           | 0.00                   | 4.01                   |
| 2     | 3        | <50           | 0.00                   | 4.00                   | <50           | 0.00                   | 4.01                   |
| 2     | 4        | <50           | 0.00                   | 4.00                   | <50           | 0.00                   | 4.01                   |
| 2     | 5        | <50           | 0.00                   | 4.00                   | <50           | 0.00                   | 4.01                   |
| 2     | 6        | <50           | 0.00                   | 4.00                   | <50           | 0.00                   | 4.01                   |
| 2     | 7        | <50           | 0.00                   | 4.00                   | <50           | 0.00                   | 4.01                   |
| 2     | 8        | <50           | 0.00                   | 4.00                   | <50           | 0.00                   | 4.01                   |
| 3     | 1        | <50           | 0.00                   | 4.00                   | <50           | 0.00                   | 4.00                   |
| 3     | 2        | <50           | 0.00                   | 4.00                   | <50           | 0.00                   | 4.00                   |
| 3     | 3        | <50           | 0.00                   | 4.00                   | <50           | 0.00                   | 4.00                   |
| 3     | 4        | <50           | 0.00                   | 4.00                   | <50           | 0.00                   | 4.00                   |
| 3     | 5        | <50           | 0.00                   | 4.00                   | <50           | 0.00                   | 4.00                   |
| 3     | 6        | <50           | 0.00                   | 4.00                   | <50           | 0.00                   | 4.00                   |
| 3     | 7        | <50           | 0.00                   | 4.00                   | <50           | 0.00                   | 4.00                   |
| 3     | 8        | <50           | 0.00                   | 4.00                   | <50           | 0.00                   | 4.00                   |
| 4     | 1        | <50           | 0.00                   | 4.00                   | <50           | 0.00                   | 4.00                   |
| 4     | 2        | <50           | 0.00                   | 4.00                   | <50           | 0.00                   | 4.00                   |
| 4     | 3        | <50           | 0.00                   | 4.00                   | <50           | 0.00                   | 4.00                   |
| 4     | 4        | <50           | 0.00                   | 4.00                   | <50           | 0.00                   | 4.00                   |
| 4     | 5        | <50           | 0.00                   | 4.00                   | <50           | 0.00                   | 4.00                   |
| 4     | 6        | <50           | 0.00                   | 4.00                   | <50           | 0.00                   | 4.00                   |
| 4     | 7        | <50           | 0.00                   | 4.00                   | <50           | 0.00                   | 4.00                   |
| 4     | 8        | <50           | 0.00                   | 4.00                   | <50           | 0.00                   | 4.00                   |
| 5     | 1        | <50           | 0.00                   | 4.00                   | <50           | 0.00                   | 4.00                   |
| 5     | 2        | <50           | 0.00                   | 4.00                   | <50           | 0.00                   | 4.00                   |
| 5     | 3        | <50           | 0.00                   | 4.00                   | <50           | 0.00                   | 4.00                   |
| 5     | 4        | <50           | 0.00                   | 4.00                   | <50           | 0.00                   | 4.00                   |
| 5     | 5        | <50           | 0.00                   | 4.00                   | <50           | 0.00                   | 4.00                   |
| 5     | 6        | <50           | 0.00                   | 4.00                   | <50           | 0.00                   | 4.00                   |
| 5     | 7        | <50           | 0.00                   | 4.00                   | <50           | 0.00                   | 4.00                   |
| 5     | 8        | <50           | 0.00                   | 4.00                   | <50           | 0.00                   | 4.00                   |
|       |          |               | Σ min                  | Σ max                  |               | Σ min                  | Σ max                  |
| 1     |          |               | 0.00                   | 32.0                   |               |                        |                        |
| 2     |          |               | 0.00                   | 32.0                   |               | 0.00                   | 32.05                  |
| 3     |          |               | 0.00                   | 32.0                   |               | 0.00                   | 32.03                  |
| 4     |          |               | 0.00                   | 32.0                   |               | 0.00                   | 31.98                  |
| 5     |          |               | 0.00                   | 32.0                   |               | 0.00                   | 32.00                  |
| Mean  |          |               | 0.00                   | 32.00                  |               | 0.00                   | 32.01                  |
| SD    |          |               | 0.00                   | 0.02                   |               | 0.00                   | 0.03                   |

**Table G.** Continued CUS.

| Stone | Fraction | LAB 1<br>CUS1 | min                    | max                    | LAB 2<br>CUS1 | min                    | max                    |
|-------|----------|---------------|------------------------|------------------------|---------------|------------------------|------------------------|
|       |          | As<br>µg/l    | r<br>mg/m <sup>2</sup> | r<br>mg/m <sup>2</sup> | As<br>µg/l    | r<br>mg/m <sup>2</sup> | r<br>mg/m <sup>2</sup> |
| 1     | 1        | 0.54          | 0.04                   | 0.04                   | 0.55          | 0.00                   | 0.04                   |
| 1     | 2        | 0.54          | 0.04                   | 0.04                   | 0.60          | 0.05                   | 0.05                   |
| 1     | 3        | 0.89          | 0.07                   | 0.07                   | 0.84          | 0.07                   | 0.07                   |
| 1     | 4        | 1.35          | 0.11                   | 0.11                   | 1.14          | 0.09                   | 0.09                   |
| 1     | 5        | 2.39          | 0.19                   | 0.19                   | 2.01          | 0.16                   | 0.16                   |
| 1     | 6        | 2.78          | 0.22                   | 0.22                   | 2.39          | 0.19                   | 0.19                   |
| 1     | 7        | 6.10          | 0.49                   | 0.49                   | 2.53          | 0.20                   | 0.20                   |
| 1     | 8        | 2.19          | 0.18                   | 0.18                   | 2.48          | 0.20                   | 0.20                   |
| 2     | 1        | 0.83          | 0.07                   | 0.07                   | 0.65          | 0.05                   | 0.05                   |
| 2     | 2        | 1.63          | 0.13                   | 0.13                   | 0.67          | 0.05                   | 0.05                   |
| 2     | 3        | 2.46          | 0.20                   | 0.20                   | 0.68          | 0.05                   | 0.05                   |
| 2     | 4        | 3.13          | 0.25                   | 0.25                   | 0.91          | 0.07                   | 0.07                   |
| 2     | 5        | 5.16          | 0.41                   | 0.41                   | 2.04          | 0.16                   | 0.16                   |
| 2     | 6        | 5.87          | 0.47                   | 0.47                   | 2.01          | 0.16                   | 0.16                   |
| 2     | 7        | 11.76         | 0.94                   | 0.94                   | 1.46          | 0.12                   | 0.12                   |
| 2     | 8        | 3.18          | 0.25                   | 0.25                   | 1.20          | 0.10                   | 0.10                   |
| 3     | 1        | 0.36          | 0.03                   | 0.03                   | 0.55          | 0.00                   | 0.04                   |
| 3     | 2        | 0.54          | 0.04                   | 0.04                   | 0.55          | 0.00                   | 0.04                   |
| 3     | 3        | 0.94          | 0.08                   | 0.08                   | 0.55          | 0.00                   | 0.04                   |
| 3     | 4        | 1.73          | 0.14                   | 0.14                   | 0.71          | 0.06                   | 0.06                   |
| 3     | 5        | 3.22          | 0.26                   | 0.26                   | 1.40          | 0.11                   | 0.11                   |
| 3     | 6        | 4.50          | 0.36                   | 0.36                   | 1.25          | 0.10                   | 0.10                   |
| 3     | 7        | 10.11         | 0.81                   | 0.81                   | 1.20          | 0.10                   | 0.10                   |
| 3     | 8        | 5.31          | 0.42                   | 0.42                   | 1.16          | 0.09                   | 0.09                   |
| 4     | 1        | 0.51          | 0.04                   | 0.04                   | 0.55          | 0.00                   | 0.04                   |
| 4     | 2        | 0.57          | 0.05                   | 0.05                   | 0.55          | 0.00                   | 0.04                   |
| 4     | 3        | 1.13          | 0.09                   | 0.09                   | 0.55          | 0.00                   | 0.04                   |
| 4     | 4        | 1.49          | 0.12                   | 0.12                   | 0.55          | 0.00                   | 0.04                   |
| 4     | 5        | 2.34          | 0.19                   | 0.19                   | 0.83          | 0.07                   | 0.07                   |
| 4     | 6        | 2.60          | 0.21                   | 0.21                   | 1.08          | 0.09                   | 0.09                   |
| 4     | 7        | 4.50          | 0.36                   | 0.36                   | 0.94          | 0.07                   | 0.07                   |
| 4     | 8        | 1.84          | 0.15                   | 0.15                   | 0.80          | 0.06                   | 0.06                   |
| 5     | 1        | 0.77          | 0.06                   | 0.06                   | 0.55          | 0.00                   | 0.04                   |
| 5     | 2        | 0.79          | 0.06                   | 0.06                   | 0.55          | 0.00                   | 0.04                   |
| 5     | 3        | 1.16          | 0.09                   | 0.09                   | 0.55          | 0.00                   | 0.04                   |
| 5     | 4        | 1.32          | 0.11                   | 0.11                   | 0.57          | 0.05                   | 0.05                   |
| 5     | 5        | 2.10          | 0.17                   | 0.17                   | 1.30          | 0.10                   | 0.10                   |
| 5     | 6        | 2.44          | 0.19                   | 0.19                   | 1.31          | 0.11                   | 0.11                   |
| 5     | 7        | 4.85          | 0.39                   | 0.39                   | 1.40          | 0.11                   | 0.11                   |
| 5     | 8        | 2.87          | 0.23                   | 0.23                   | 1.37          | 0.11                   | 0.11                   |
|       |          |               | Σ min                  | Σ max                  |               | Σ min                  | Σ max                  |
| 1     |          |               | 1.34                   | 1.34                   |               | 0.96                   | 1.00                   |
| 2     |          |               | 2.72                   | 2.72                   |               | 0.77                   | 0.77                   |
| 3     |          |               | 2.14                   | 2.14                   |               | 0.46                   | 0.59                   |
| 4     |          |               | 1.20                   | 1.20                   |               | 0.29                   | 0.47                   |
| 5     |          |               | 1.30                   | 1.30                   |               | 0.48                   | 0.61                   |
| Mean  |          |               | 1.74                   | 1.74                   |               | 0.59                   | 0.69                   |
| SD    |          |               | 0.66                   | 0.66                   |               | 0.27                   | 0.21                   |

**Table G.** Continued CUS.

| Stone | Fraction | LAB 2<br>CUS2 | min                    | max                    | LAB 2<br>CUS3 | min                    | max                    |
|-------|----------|---------------|------------------------|------------------------|---------------|------------------------|------------------------|
|       |          | As<br>µg/l    | r<br>mg/m <sup>2</sup> | r<br>mg/m <sup>2</sup> | As<br>µg/l    | r<br>mg/m <sup>2</sup> | r<br>mg/m <sup>2</sup> |
| 1     | 1        | <0.27         | 0.00                   | 0.02                   |               |                        |                        |
| 1     | 2        | 0.42          | 0.03                   | 0.03                   |               |                        |                        |
| 1     | 3        | 0.57          | 0.05                   | 0.05                   |               |                        |                        |
| 1     | 4        | 0.65          | 0.05                   | 0.05                   |               |                        |                        |
| 1     | 5        | 0.84          | 0.07                   | 0.07                   |               |                        |                        |
| 1     | 6        | 0.69          | 0.06                   | 0.06                   |               |                        |                        |
| 1     | 7        | 0.88          | 0.07                   | 0.07                   |               |                        |                        |
| 1     | 8        | 0.61          | 0.05                   | 0.05                   |               |                        |                        |
| 2     | 1        | <0.27         | 0.00                   | 0.02                   | 0.44          | 0.035                  | 0.035                  |
| 2     | 2        | <0.27         | 0.00                   | 0.02                   | 0.55          | 0.044                  | 0.044                  |
| 2     | 3        | <0.27         | 0.00                   | 0.02                   | 0.54          | 0.043                  | 0.043                  |
| 2     | 4        | <0.27         | 0.00                   | 0.02                   | 0.86          | 0.069                  | 0.069                  |
| 2     | 5        | <0.27         | 0.00                   | 0.02                   | 0.85          | 0.068                  | 0.068                  |
| 2     | 6        | 0.51          | 0.04                   | 0.04                   | 0.90          | 0.072                  | 0.072                  |
| 2     | 7        | <0.27         | 0.00                   | 0.02                   | 0.70          | 0.056                  | 0.056                  |
| 2     | 8        | <0.27         | 0.00                   | 0.02                   | 0.64          | 0.051                  | 0.051                  |
| 3     | 1        | <0.27         | 0.00                   | 0.02                   | 0.47          | 0.038                  | 0.038                  |
| 3     | 2        | 0.29          | 0.02                   | 0.02                   | 1.62          | 0.130                  | 0.130                  |
| 3     | 3        | 0.44          | 0.04                   | 0.04                   | 2.40          | 0.192                  | 0.192                  |
| 3     | 4        | 0.50          | 0.04                   | 0.04                   | 3.41          | 0.273                  | 0.273                  |
| 3     | 5        | 0.52          | 0.04                   | 0.04                   | 3.47          | 0.277                  | 0.277                  |
| 3     | 6        | 0.53          | 0.04                   | 0.04                   | 3.03          | 0.242                  | 0.242                  |
| 3     | 7        | 0.46          | 0.04                   | 0.04                   | 2.55          | 0.204                  | 0.204                  |
| 3     | 8        | 0.43          | 0.03                   | 0.03                   | 2.37          | 0.190                  | 0.190                  |
| 4     | 1        | <0.27         | 0.00                   | 0.02                   | 0.43          | 0.034                  | 0.034                  |
| 4     | 2        | 0.34          | 0.03                   | 0.03                   | 0.72          | 0.057                  | 0.057                  |
| 4     | 3        | 0.44          | 0.04                   | 0.04                   | 0.75          | 0.060                  | 0.060                  |
| 4     | 4        | 0.45          | 0.04                   | 0.04                   | 0.98          | 0.078                  | 0.078                  |
| 4     | 5        | 0.37          | 0.03                   | 0.03                   | 1.32          | 0.106                  | 0.106                  |
| 4     | 6        | 0.29          | 0.02                   | 0.02                   | 1.24          | 0.099                  | 0.099                  |
| 4     | 7        | <0.27         | 0.00                   | 0.02                   | 1.32          | 0.105                  | 0.105                  |
| 4     | 8        | <0.27         | 0.00                   | 0.02                   | 1.34          | 0.107                  | 0.107                  |
| 5     | 1        | 0.30          | 0.02                   | 0.02                   | 0.62          | 0.049                  | 0.049                  |
| 5     | 2        | 0.63          | 0.05                   | 0.05                   | 0.66          | 0.053                  | 0.053                  |
| 5     | 3        | 0.82          | 0.07                   | 0.07                   | 0.72          | 0.058                  | 0.058                  |
| 5     | 4        | 0.93          | 0.07                   | 0.07                   | 0.74          | 0.059                  | 0.059                  |
| 5     | 5        | 1.51          | 0.12                   | 0.12                   | 1.03          | 0.083                  | 0.083                  |
| 5     | 6        | 1.15          | 0.09                   | 0.09                   | 1.17          | 0.093                  | 0.093                  |
| 5     | 7        | 1.10          | 0.09                   | 0.09                   | 1.05          | 0.084                  | 0.084                  |
| 5     | 8        | 1.12          | 0.09                   | 0.09                   | 1.01          | 0.081                  | 0.081                  |
|       |          |               | Σ min                  | Σ max                  |               | Σ min                  | Σ max                  |
| 1     |          |               | 0.37                   | 0.39                   |               |                        |                        |
| 2     |          |               | 0.04                   | 0.19                   |               | 0.439                  | 0.439                  |
| 3     |          |               | 0.25                   | 0.28                   |               | 1.547                  | 1.547                  |
| 4     |          |               | 0.15                   | 0.22                   |               | 0.648                  | 0.648                  |
| 5     |          |               | 0.60                   | 0.60                   |               | 0.561                  | 0.561                  |
| Mean  |          |               | 0.28                   | 0.34                   |               | 0.798                  | 0.798                  |
| SD    |          |               | 0.22                   | 0.17                   |               | 0.506                  | 0.506                  |

**Table G.** Continued CUS.

| Stone | Fraction | LAB 1              | min                    | max                    | LAB 2              | min                    | max                    |
|-------|----------|--------------------|------------------------|------------------------|--------------------|------------------------|------------------------|
|       |          | CUS1<br>Ba<br>µg/l | r<br>mg/m <sup>2</sup> | r<br>mg/m <sup>2</sup> | CUS1<br>Ba<br>µg/l | r<br>mg/m <sup>2</sup> | r<br>mg/m <sup>2</sup> |
| 1     | 1        | 190                | 15.21                  | 15.21                  | 4.03               | 0.32                   | 0.32                   |
| 1     | 2        | 458                | 36.61                  | 36.61                  | 2.65               | 0.21                   | 0.21                   |
| 1     | 3        | 337                | 26.92                  | 26.92                  | 3.58               | 0.29                   | 0.29                   |
| 1     | 4        | 62                 | 4.92                   | 4.92                   | 4.69               | 0.37                   | 0.37                   |
| 1     | 5        | 363                | 29.02                  | 29.02                  | 5.37               | 0.43                   | 0.43                   |
| 1     | 6        | 417                | 33.37                  | 33.37                  | 6.67               | 0.53                   | 0.53                   |
| 1     | 7        | 346                | 27.65                  | 27.65                  | 4.52               | 0.36                   | 0.36                   |
| 1     | 8        | 371                | 29.65                  | 29.65                  | 4.64               | 0.37                   | 0.37                   |
| 2     | 1        | 443                | 35.44                  | 35.44                  | 6.40               | 0.51                   | 0.51                   |
| 2     | 2        | 406                | 32.44                  | 32.44                  | 4.28               | 0.34                   | 0.34                   |
| 2     | 3        | 219                | 17.52                  | 17.52                  | 3.76               | 0.30                   | 0.30                   |
| 2     | 4        | 393                | 31.45                  | 31.45                  | 4.28               | 0.34                   | 0.34                   |
| 2     | 5        | 178                | 14.27                  | 14.27                  | 5.23               | 0.42                   | 0.42                   |
| 2     | 6        | 361                | 28.85                  | 28.85                  | 4.54               | 0.36                   | 0.36                   |
| 2     | 7        | 495                | 39.62                  | 39.62                  | 6.32               | 0.51                   | 0.51                   |
| 2     | 8        | 233                | 18.67                  | 18.67                  | 3.44               | 0.27                   | 0.27                   |
| 3     | 1        | 396                | 31.66                  | 31.66                  | 6.53               | 0.52                   | 0.52                   |
| 3     | 2        | 389                | 31.08                  | 31.08                  | 2.71               | 0.22                   | 0.22                   |
| 3     | 3        | 413                | 33.07                  | 33.07                  | 7.61               | 0.61                   | 0.61                   |
| 3     | 4        | 160                | 12.76                  | 12.76                  | 5.32               | 0.43                   | 0.43                   |
| 3     | 5        | 111                | 8.86                   | 8.86                   | 4.41               | 0.35                   | 0.35                   |
| 3     | 6        | 447                | 35.79                  | 35.79                  | 4.23               | 0.34                   | 0.34                   |
| 3     | 7        | 343                | 27.47                  | 27.47                  | 3.67               | 0.29                   | 0.29                   |
| 3     | 8        | 301                | 24.10                  | 24.10                  | 7.64               | 0.61                   | 0.61                   |
| 4     | 1        | 382                | 30.56                  | 30.56                  | 6.56               | 0.52                   | 0.52                   |
| 4     | 2        | 422                | 33.74                  | 33.74                  | 4.13               | 0.33                   | 0.33                   |
| 4     | 3        | 302                | 24.14                  | 24.14                  | 5.30               | 0.42                   | 0.42                   |
| 4     | 4        | 369                | 29.49                  | 29.49                  | 4.68               | 0.37                   | 0.37                   |
| 4     | 5        | 81                 | 6.51                   | 6.51                   | 4.19               | 0.33                   | 0.33                   |
| 4     | 6        | 404                | 32.29                  | 32.29                  | 3.96               | 0.32                   | 0.32                   |
| 4     | 7        | 357                | 28.54                  | 28.54                  | 6.51               | 0.52                   | 0.52                   |
| 4     | 8        | 338                | 27.05                  | 27.05                  | 17.65              | 1.41                   | 1.41                   |
| 5     | 1        | 414                | 33.10                  | 33.10                  | 11.40              | 0.91                   | 0.91                   |
| 5     | 2        | 118                | 9.42                   | 9.42                   | 2.70               | 0.22                   | 0.22                   |
| 5     | 3        | 394                | 31.49                  | 31.49                  | 4.56               | 0.37                   | 0.37                   |
| 5     | 4        | 192                | 15.34                  | 15.34                  | 5.18               | 0.41                   | 0.41                   |
| 5     | 5        | 412                | 32.93                  | 32.93                  | 5.06               | 0.41                   | 0.41                   |
| 5     | 6        | 423                | 33.82                  | 33.82                  | 3.66               | 0.29                   | 0.29                   |
| 5     | 7        | 397                | 31.74                  | 31.74                  | 5.09               | 0.41                   | 0.41                   |
| 5     | 8        | 364                | 29.09                  | 29.09                  |                    |                        |                        |
|       |          |                    | Σ min                  | Σ max                  |                    | Σ min                  | Σ max                  |
| 1     |          |                    | 203                    | 203                    |                    | 2.89                   | 2.89                   |
| 2     |          |                    | 218                    | 218                    |                    | 3.06                   | 3.06                   |
| 3     |          |                    | 205                    | 218                    |                    | 3.37                   | 3.37                   |
| 4     |          |                    | 212                    | 212                    |                    | 4.23                   | 4.23                   |
| 5     |          |                    | 217                    | 217                    |                    | 3.66                   | 3.66                   |
| Mean  |          |                    | 211                    | 214                    |                    | 3.44                   | 3.44                   |
| SD    |          |                    | 7                      | 6                      |                    | 0.53                   | 0.53                   |

**Table G.** Continued CUS.

| Stone | Fraction | LAB 2<br>CUS2 | min                    | max                    | LAB 2<br>CUS3 | min                    | max                    |
|-------|----------|---------------|------------------------|------------------------|---------------|------------------------|------------------------|
|       |          | Ba<br>µg/l    | r<br>mg/m <sup>2</sup> | r<br>mg/m <sup>2</sup> | Ba<br>µg/l    | r<br>mg/m <sup>2</sup> | r<br>mg/m <sup>2</sup> |
| 1     | 1        | 0.68          | 0.055                  | 0.055                  |               |                        |                        |
| 1     | 2        | 0.91          | 0.073                  | 0.073                  |               |                        |                        |
| 1     | 3        | 0.77          | 0.062                  | 0.062                  |               |                        |                        |
| 1     | 4        | 0.65          | 0.052                  | 0.052                  |               |                        |                        |
| 1     | 5        | 0.89          | 0.071                  | 0.071                  |               |                        |                        |
| 1     | 6        | 0.77          | 0.061                  | 0.061                  |               |                        |                        |
| 1     | 7        | 1.38          | 0.110                  | 0.110                  |               |                        |                        |
| 1     | 8        | 1.49          | 0.119                  | 0.119                  |               |                        |                        |
| 2     | 1        | 1.05          | 0.084                  | 0.084                  | <0.73         | 0.000                  | 0.058                  |
| 2     | 2        | 0.69          | 0.055                  | 0.055                  | <0.73         | 0.000                  | 0.058                  |
| 2     | 3        | 0.79          | 0.063                  | 0.063                  | 0.95          | 0.076                  | 0.076                  |
| 2     | 4        | 1.03          | 0.082                  | 0.082                  | <0.73         | 0.000                  | 0.058                  |
| 2     | 5        | 2.01          | 0.161                  | 0.161                  | 0.82          | 0.066                  | 0.066                  |
| 2     | 6        | 1.38          | 0.110                  | 0.110                  | 1.05          | 0.084                  | 0.084                  |
| 2     | 7        | 4.65          | 0.372                  | 0.372                  | <0.73         | 0.000                  | 0.058                  |
| 2     | 8        | 3.98          | 0.318                  | 0.318                  | 1.90          | 0.152                  | 0.152                  |
| 3     | 1        | 0.77          | 0.062                  | 0.062                  | <0.73         | 0.000                  | 0.058                  |
| 3     | 2        | 1.08          | 0.086                  | 0.086                  | <0.73         | 0.000                  | 0.058                  |
| 3     | 3        | 1.18          | 0.094                  | 0.094                  | 0.87          | 0.070                  | 0.070                  |
| 3     | 4        | 1.17          | 0.093                  | 0.093                  | 1.28          | 0.102                  | 0.102                  |
| 3     | 5        | 1.18          | 0.094                  | 0.094                  | 2.77          | 0.222                  | 0.222                  |
| 3     | 6        | 1.09          | 0.087                  | 0.087                  | 2.98          | 0.239                  | 0.239                  |
| 3     | 7        | 1.63          | 0.130                  | 0.130                  | 5.19          | 0.416                  | 0.416                  |
| 3     | 8        | 1.01          | 0.080                  | 0.080                  | 4.69          | 0.376                  | 0.376                  |
| 4     | 1        | 1.56          | 0.125                  | 0.125                  | 0.85          | 0.068                  | 0.068                  |
| 4     | 2        | 2.70          | 0.216                  | 0.216                  | 0.95          | 0.076                  | 0.076                  |
| 4     | 3        | 2.31          | 0.185                  | 0.185                  | 0.85          | 0.068                  | 0.068                  |
| 4     | 4        | 2.07          | 0.166                  | 0.166                  | 1.30          | 0.104                  | 0.104                  |
| 4     | 5        | 2.90          | 0.232                  | 0.232                  | 2.32          | 0.185                  | 0.185                  |
| 4     | 6        | 2.37          | 0.189                  | 0.189                  | 2.84          | 0.227                  | 0.227                  |
| 4     | 7        | 3.86          | 0.309                  | 0.309                  | 4.98          | 0.398                  | 0.398                  |
| 4     | 8        | 2.68          | 0.215                  | 0.215                  | 2.86          | 0.228                  | 0.228                  |
| 5     | 1        | 1.75          | 0.140                  | 0.140                  | 0.90          | 0.072                  | 0.072                  |
| 5     | 2        | 1.95          | 0.156                  | 0.156                  | <0.73         | 0.000                  | 0.058                  |
| 5     | 3        | 1.67          | 0.134                  | 0.134                  | <0.73         | 0.000                  | 0.058                  |
| 5     | 4        | 1.35          | 0.108                  | 0.108                  | 0.76          | 0.061                  | 0.061                  |
| 5     | 5        | 1.77          | 0.142                  | 0.142                  | 1.21          | 0.097                  | 0.097                  |
| 5     | 6        | 1.25          | 0.100                  | 0.100                  | 2.25          | 0.180                  | 0.180                  |
| 5     | 7        | 2.08          | 0.166                  | 0.166                  | 3.62          | 0.290                  | 0.290                  |
| 5     | 8        | 1.50          | 0.120                  | 0.120                  | 2.98          | 0.239                  | 0.239                  |
|       |          |               | Σ min                  | Σ max                  |               | Σ min                  | Σ max                  |
| 1     |          |               | 0.602                  | 0.602                  |               |                        |                        |
| 2     |          |               | 1.245                  | 1.245                  |               | 0.378                  | 0.612                  |
| 3     |          |               | 0.728                  | 0.728                  |               | 1.424                  | 1.541                  |
| 4     |          |               | 1.637                  | 1.637                  |               | 1.354                  | 1.354                  |
| 5     |          |               | 1.067                  | 1.067                  |               | 0.938                  | 1.054                  |
| Mean  |          |               | 1.056                  | 1.056                  |               | 1.024                  | 1.140                  |
| SD    |          |               | 0.414                  | 0.414                  |               | 0.481                  | 0.405                  |

**Table G.** Continued CUS.

| Stone | Fraction | LAB 1              | min                    | max                    | LAB 2              | min                    | max                    |
|-------|----------|--------------------|------------------------|------------------------|--------------------|------------------------|------------------------|
|       |          | CUS1<br>Cd<br>µg/l | r<br>mg/m <sup>2</sup> | r<br>mg/m <sup>2</sup> | CUS1<br>Cd<br>µg/l | r<br>mg/m <sup>2</sup> | r<br>mg/m <sup>2</sup> |
| 1     | 1        | 0.02               | 0.002                  | 0.002                  | 0.10               | 0.01                   | 0.01                   |
| 1     | 2        | 0.03               | 0.002                  | 0.002                  | 0.12               | 0.01                   | 0.01                   |
| 1     | 3        | 0.03               | 0.002                  | 0.002                  | 0.26               | 0.02                   | 0.02                   |
| 1     | 4        | 0.01               | 0.001                  | 0.001                  | 0.31               | 0.02                   | 0.02                   |
| 1     | 5        | 0.03               | 0.002                  | 0.002                  | 0.43               | 0.03                   | 0.03                   |
| 1     | 6        | 0.03               | 0.002                  | 0.002                  | 0.28               | 0.02                   | 0.02                   |
| 1     | 7        | 0.17               | 0.014                  | 0.014                  | 0.31               | 0.02                   | 0.02                   |
| 1     | 8        | 0.10               | 0.008                  | 0.008                  | 0.24               | 0.02                   | 0.02                   |
| 2     | 1        | 0.04               | 0.003                  | 0.003                  | 0.04               | 0.00                   | 0.00                   |
| 2     | 2        | 0.03               | 0.002                  | 0.002                  | 0.05               | 0.00                   | 0.00                   |
| 2     | 3        | 0.03               | 0.002                  | 0.002                  | 0.16               | 0.01                   | 0.01                   |
| 2     | 4        | 0.03               | 0.002                  | 0.002                  | 0.25               | 0.02                   | 0.02                   |
| 2     | 5        | 0.02               | 0.002                  | 0.002                  | 0.52               | 0.04                   | 0.04                   |
| 2     | 6        | 0.03               | 0.003                  | 0.003                  | 0.40               | 0.03                   | 0.03                   |
| 2     | 7        | 0.19               | 0.015                  | 0.015                  | 0.45               | 0.04                   | 0.04                   |
| 2     | 8        | 0.13               | 0.011                  | 0.011                  | 0.31               | 0.02                   | 0.02                   |
| 3     | 1        | 0.04               | 0.003                  | 0.003                  | 0.02               | 0.00                   | 0.00                   |
| 3     | 2        | 0.05               | 0.004                  | 0.004                  | 0.06               | 0.00                   | 0.00                   |
| 3     | 3        | 0.06               | 0.005                  | 0.005                  | 0.23               | 0.02                   | 0.02                   |
| 3     | 4        | 0.06               | 0.005                  | 0.005                  | 0.21               | 0.02                   | 0.02                   |
| 3     | 5        | 0.15               | 0.012                  | 0.012                  | 0.26               | 0.02                   | 0.02                   |
| 3     | 6        | 0.14               | 0.011                  | 0.011                  | 0.16               | 0.01                   | 0.01                   |
| 3     | 7        | 0.61               | 0.049                  | 0.049                  | 0.21               | 0.02                   | 0.02                   |
| 3     | 8        | 0.31               | 0.025                  | 0.025                  | 0.18               | 0.01                   | 0.01                   |
| 4     | 1        | 0.03               | 0.002                  | 0.002                  | 0.27               | 0.02                   | 0.02                   |
| 4     | 2        | 0.03               | 0.002                  | 0.002                  | 0.17               | 0.01                   | 0.01                   |
| 4     | 3        | 0.03               | 0.002                  | 0.002                  | 0.47               | 0.04                   | 0.04                   |
| 4     | 4        | 0.03               | 0.002                  | 0.002                  | 0.83               | 0.07                   | 0.07                   |
| 4     | 5        | 0.02               | 0.002                  | 0.002                  | 1.32               | 0.11                   | 0.11                   |
| 4     | 6        | 0.05               | 0.004                  | 0.004                  | 1.02               | 0.08                   | 0.08                   |
| 4     | 7        | 0.42               | 0.033                  | 0.033                  | 1.23               | 0.10                   | 0.10                   |
| 4     | 8        | 0.22               | 0.018                  | 0.018                  | 1.06               | 0.08                   | 0.08                   |
| 5     | 1        | 0.03               | 0.002                  | 0.002                  | 0.04               | 0.00                   | 0.00                   |
| 5     | 2        | 0.01               | 0.001                  | 0.001                  | 0.04               | 0.00                   | 0.00                   |
| 5     | 3        | 0.02               | 0.002                  | 0.002                  | 0.13               | 0.01                   | 0.01                   |
| 5     | 4        | 0.02               | 0.001                  | 0.001                  | 0.22               | 0.02                   | 0.02                   |
| 5     | 5        | 0.04               | 0.003                  | 0.003                  | 0.37               | 0.03                   | 0.03                   |
| 5     | 6        | 0.04               | 0.003                  | 0.003                  | 0.20               | 0.02                   | 0.02                   |
| 5     | 7        | 0.28               | 0.022                  | 0.022                  | 0.27               | 0.02                   | 0.02                   |
| 5     | 8        | 0.21               | 0.017                  | 0.017                  | 0.23               | 0.02                   | 0.02                   |
|       |          |                    | Σ min                  | Σ max                  |                    | Σ min                  | Σ max                  |
| 1     |          |                    | 0.033                  | 0.033                  |                    | 0.16                   | 0.16                   |
| 2     |          |                    | 0.040                  | 0.040                  |                    | 0.17                   | 0.17                   |
| 3     |          |                    | 0.114                  | 0.114                  |                    | 0.11                   | 0.11                   |
| 4     |          |                    | 0.066                  | 0.066                  |                    | 0.51                   | 0.51                   |
| 5     |          |                    | 0.052                  | 0.052                  |                    | 0.12                   | 0.12                   |
| Mean  |          |                    | 0.061                  | 0.061                  |                    | 0.21                   | 0.21                   |
| SD    |          |                    | 0.032                  | 0.032                  |                    | 0.17                   | 0.17                   |

**Table G.** Continued CUS.

| Stone | Fraction | LAB 2<br>CUS2 | min                    | max                    | LAB 2<br>CUS3 | min                    | max                    |
|-------|----------|---------------|------------------------|------------------------|---------------|------------------------|------------------------|
|       |          | Cd<br>µg/l    | r<br>mg/m <sup>2</sup> | r<br>mg/m <sup>2</sup> | Cd<br>µg/l    | r<br>mg/m <sup>2</sup> | r<br>mg/m <sup>2</sup> |
| 1     | 1        | 0.47          | 0.037                  | 0.037                  |               |                        |                        |
| 1     | 2        | 0.52          | 0.041                  | 0.041                  |               |                        |                        |
| 1     | 3        | 0.36          | 0.028                  | 0.028                  |               |                        |                        |
| 1     | 4        | 0.30          | 0.024                  | 0.024                  |               |                        |                        |
| 1     | 5        | 0.42          | 0.034                  | 0.034                  |               |                        |                        |
| 1     | 6        | 0.39          | 0.031                  | 0.031                  |               |                        |                        |
| 1     | 7        | 0.74          | 0.059                  | 0.059                  |               |                        |                        |
| 1     | 8        | 0.53          | 0.042                  | 0.042                  |               |                        |                        |
| 2     | 1        | 0.32          | 0.026                  | 0.026                  | 0.07          | 0.005                  | 0.005                  |
| 2     | 2        | 0.25          | 0.020                  | 0.020                  | 0.08          | 0.006                  | 0.006                  |
| 2     | 3        | 0.20          | 0.016                  | 0.016                  | 0.06          | 0.005                  | 0.005                  |
| 2     | 4        | 0.24          | 0.019                  | 0.019                  | 0.08          | 0.006                  | 0.006                  |
| 2     | 5        | 0.41          | 0.033                  | 0.033                  | 0.14          | 0.011                  | 0.011                  |
| 2     | 6        | 0.39          | 0.031                  | 0.031                  | 0.16          | 0.013                  | 0.013                  |
| 2     | 7        | 1.46          | 0.117                  | 0.117                  | 0.26          | 0.021                  | 0.021                  |
| 2     | 8        | 1.35          | 0.108                  | 0.108                  | 0.22          | 0.017                  | 0.017                  |
| 3     | 1        | 0.12          | 0.010                  | 0.010                  | 0.08          | 0.006                  | 0.006                  |
| 3     | 2        | 0.19          | 0.015                  | 0.015                  | 0.08          | 0.007                  | 0.007                  |
| 3     | 3        | 0.27          | 0.021                  | 0.021                  | 0.10          | 0.008                  | 0.008                  |
| 3     | 4        | 0.31          | 0.025                  | 0.025                  | 0.16          | 0.013                  | 0.013                  |
| 3     | 5        | 0.34          | 0.027                  | 0.027                  | 0.31          | 0.025                  | 0.025                  |
| 3     | 6        | 0.34          | 0.027                  | 0.027                  | 0.34          | 0.027                  | 0.027                  |
| 3     | 7        | 0.56          | 0.044                  | 0.044                  | 0.49          | 0.039                  | 0.039                  |
| 3     | 8        | 0.35          | 0.028                  | 0.028                  | 0.47          | 0.037                  | 0.037                  |
| 4     | 1        | 0.28          | 0.022                  | 0.022                  | 0.06          | 0.005                  | 0.005                  |
| 4     | 2        | 0.21          | 0.017                  | 0.017                  | 0.10          | 0.008                  | 0.008                  |
| 4     | 3        | 0.15          | 0.012                  | 0.012                  | 0.08          | 0.006                  | 0.006                  |
| 4     | 4        | 0.14          | 0.011                  | 0.011                  | 0.13          | 0.010                  | 0.010                  |
| 4     | 5        | 0.18          | 0.014                  | 0.014                  | 0.23          | 0.018                  | 0.018                  |
| 4     | 6        | 0.15          | 0.012                  | 0.012                  | 0.26          | 0.021                  | 0.021                  |
| 4     | 7        | 0.30          | 0.024                  | 0.024                  | 0.44          | 0.035                  | 0.035                  |
| 4     | 8        | 0.18          | 0.014                  | 0.014                  | 0.29          | 0.023                  | 0.023                  |
| 5     | 1        | 0.77          | 0.061                  | 0.061                  | 0.08          | 0.007                  | 0.007                  |
| 5     | 2        | 0.53          | 0.042                  | 0.042                  | 0.09          | 0.008                  | 0.008                  |
| 5     | 3        | 0.42          | 0.034                  | 0.034                  | 0.09          | 0.007                  | 0.007                  |
| 5     | 4        | 0.43          | 0.035                  | 0.035                  | 0.09          | 0.007                  | 0.007                  |
| 5     | 5        | 0.66          | 0.053                  | 0.053                  | 0.20          | 0.016                  | 0.016                  |
| 5     | 6        | 0.53          | 0.043                  | 0.043                  | 0.27          | 0.022                  | 0.022                  |
| 5     | 7        | 0.99          | 0.080                  | 0.080                  | 0.35          | 0.028                  | 0.028                  |
| 5     | 8        | 0.84          | 0.067                  | 0.067                  | 0.29          | 0.023                  | 0.023                  |
|       |          |               | Σ min                  | Σ max                  |               | Σ min                  | Σ max                  |
| 1     |          |               | 0.297                  | 0.297                  |               |                        |                        |
| 2     |          |               | 0.370                  | 0.370                  |               | 0.085                  | 0.085                  |
| 3     |          |               | 0.198                  | 0.198                  |               | 0.161                  | 0.161                  |
| 4     |          |               | 0.127                  | 0.127                  |               | 0.126                  | 0.126                  |
| 5     |          |               | 0.414                  | 0.414                  |               | 0.117                  | 0.117                  |
| Mean  |          |               | 0.281                  | 0.281                  |               | 0.122                  | 0.122                  |
| SD    |          |               | 0.119                  | 0.119                  |               | 0.032                  | 0.032                  |

**Table G.** Continued CUS.

| Stone | Fraction | LAB 1              | min                    | max                    | LAB 2              | min                    | max                    |
|-------|----------|--------------------|------------------------|------------------------|--------------------|------------------------|------------------------|
|       |          | CUS1<br>Co<br>µg/l | r<br>mg/m <sup>2</sup> | r<br>mg/m <sup>2</sup> | CUS1<br>Co<br>µg/l | r<br>mg/m <sup>2</sup> | r<br>mg/m <sup>2</sup> |
| 1     | 1        | 0.09               | 0.007                  | 0.007                  | 0.27               | 0.02                   | 0.02                   |
| 1     | 2        | 0.20               | 0.016                  | 0.016                  | 0.31               | 0.02                   | 0.02                   |
| 1     | 3        | 0.27               | 0.022                  | 0.022                  | 0.46               | 0.04                   | 0.04                   |
| 1     | 4        | 0.17               | 0.013                  | 0.013                  | 0.41               | 0.03                   | 0.03                   |
| 1     | 5        | 0.34               | 0.027                  | 0.027                  | 0.67               | 0.05                   | 0.05                   |
| 1     | 6        | 0.38               | 0.030                  | 0.030                  | 0.49               | 0.04                   | 0.04                   |
| 1     | 7        | 1.45               | 0.116                  | 0.116                  | 0.64               | 0.05                   | 0.05                   |
| 1     | 8        | 1.00               | 0.080                  | 0.080                  | 0.54               | 0.04                   | 0.04                   |
| 2     | 1        | 0.14               | 0.011                  | 0.011                  | 0.16               | 0.01                   | 0.01                   |
| 2     | 2        | 0.30               | 0.024                  | 0.024                  | 0.18               | 0.01                   | 0.01                   |
| 2     | 3        | 0.46               | 0.037                  | 0.037                  | 0.41               | 0.03                   | 0.03                   |
| 2     | 4        | 0.38               | 0.030                  | 0.030                  | 0.50               | 0.04                   | 0.04                   |
| 2     | 5        | 0.53               | 0.043                  | 0.043                  | 0.98               | 0.08                   | 0.08                   |
| 2     | 6        | 0.56               | 0.045                  | 0.045                  | 0.79               | 0.06                   | 0.06                   |
| 2     | 7        | 1.72               | 0.137                  | 0.137                  | 1.13               | 0.09                   | 0.09                   |
| 2     | 8        | 1.67               | 0.134                  | 0.134                  | 0.90               | 0.07                   | 0.07                   |
| 3     | 1        | 0.26               | 0.021                  | 0.021                  | 0.12               | 0.01                   | 0.01                   |
| 3     | 2        | 0.36               | 0.029                  | 0.029                  | 0.29               | 0.02                   | 0.02                   |
| 3     | 3        | 0.39               | 0.031                  | 0.031                  | 0.57               | 0.05                   | 0.05                   |
| 3     | 4        | 0.36               | 0.029                  | 0.029                  | 0.46               | 0.04                   | 0.04                   |
| 3     | 5        | 0.58               | 0.047                  | 0.047                  | 0.76               | 0.06                   | 0.06                   |
| 3     | 6        | 0.58               | 0.046                  | 0.046                  | 0.53               | 0.04                   | 0.04                   |
| 3     | 7        | 1.41               | 0.113                  | 0.113                  | 0.82               | 0.07                   | 0.07                   |
| 3     | 8        | 0.85               | 0.068                  | 0.068                  | 0.82               | 0.07                   | 0.07                   |
| 4     | 1        | 0.14               | 0.012                  | 0.012                  | 1.19               | 0.10                   | 0.10                   |
| 4     | 2        | 0.26               | 0.021                  | 0.021                  | 0.54               | 0.04                   | 0.04                   |
| 4     | 3        | 0.37               | 0.030                  | 0.030                  | 1.17               | 0.09                   | 0.09                   |
| 4     | 4        | 0.21               | 0.017                  | 0.017                  | 1.72               | 0.14                   | 0.14                   |
| 4     | 5        | 0.42               | 0.034                  | 0.034                  | 3.52               | 0.28                   | 0.28                   |
| 4     | 6        | 0.42               | 0.034                  | 0.034                  | 3.25               | 0.26                   | 0.26                   |
| 4     | 7        | 1.19               | 0.095                  | 0.095                  | 4.79               | 0.38                   | 0.38                   |
| 4     | 8        | 0.73               | 0.058                  | 0.058                  | 5.26               | 0.42                   | 0.42                   |
| 5     | 1        | 0.14               | 0.011                  | 0.011                  | 0.15               | 0.01                   | 0.01                   |
| 5     | 2        | 0.16               | 0.013                  | 0.013                  | 0.17               | 0.01                   | 0.01                   |
| 5     | 3        | 0.22               | 0.018                  | 0.018                  | 0.41               | 0.03                   | 0.03                   |
| 5     | 4        | 0.16               | 0.013                  | 0.013                  | 0.46               | 0.04                   | 0.04                   |
| 5     | 5        | 0.23               | 0.018                  | 0.018                  | 0.77               | 0.06                   | 0.06                   |
| 5     | 6        | 0.24               | 0.019                  | 0.019                  | 0.47               | 0.04                   | 0.04                   |
| 5     | 7        | 0.59               | 0.047                  | 0.047                  | 0.74               | 0.06                   | 0.06                   |
| 5     | 8        | 0.46               | 0.037                  | 0.037                  | 0.66               | 0.05                   | 0.05                   |
|       |          |                    | Σ min                  | Σ max                  |                    | Σ min                  | Σ max                  |
| 1     |          |                    | 0.312                  | 0.312                  |                    | 0.30                   | 0.30                   |
| 2     |          |                    | 0.461                  | 0.461                  |                    | 0.40                   | 0.40                   |
| 3     |          |                    | 0.384                  | 0.384                  |                    | 0.35                   | 0.35                   |
| 4     |          |                    | 0.300                  | 0.300                  |                    | 1.71                   | 1.71                   |
| 5     |          |                    | 0.176                  | 0.176                  |                    | 0.31                   | 0.31                   |
| Mean  |          |                    | 0.327                  | 0.327                  |                    | 0.62                   | 0.62                   |
| SD    |          |                    | 0.106                  | 0.106                  |                    | 0.62                   | 0.62                   |

**Table G.** Continued CUS.

| Stone | Fraction | LAB 2<br>CUS2 | min                    | max                    | LAB 2<br>CUS3 | min                    | max                    |
|-------|----------|---------------|------------------------|------------------------|---------------|------------------------|------------------------|
|       |          | Co<br>µg/l    | r<br>mg/m <sup>2</sup> | r<br>mg/m <sup>2</sup> | Co<br>µg/l    | r<br>mg/m <sup>2</sup> | r<br>mg/m <sup>2</sup> |
| 1     | 1        | 0.33          | 0.026                  | 0.026                  |               |                        |                        |
| 1     | 2        | 0.20          | 0.016                  | 0.016                  |               |                        |                        |
| 1     | 3        | <0.20         | 0.000                  | 0.016                  |               |                        |                        |
| 1     | 4        | <0.20         | 0.000                  | 0.016                  |               |                        |                        |
| 1     | 5        | 0.22          | 0.017                  | 0.017                  |               |                        |                        |
| 1     | 6        | 0.20          | 0.016                  | 0.016                  |               |                        |                        |
| 1     | 7        | 0.38          | 0.030                  | 0.030                  |               |                        |                        |
| 1     | 8        | 0.31          | 0.025                  | 0.025                  |               |                        |                        |
| 2     | 1        | 0.59          | 0.048                  | 0.048                  | 0.11          | 0.009                  | 0.009                  |
| 2     | 2        | 0.30          | 0.024                  | 0.024                  | 0.11          | 0.009                  | 0.009                  |
| 2     | 3        | 0.32          | 0.026                  | 0.026                  | 0.10          | 0.008                  | 0.008                  |
| 2     | 4        | 0.35          | 0.028                  | 0.028                  | 0.10          | 0.008                  | 0.008                  |
| 2     | 5        | 0.60          | 0.048                  | 0.048                  | 0.15          | 0.012                  | 0.012                  |
| 2     | 6        | 0.45          | 0.036                  | 0.036                  | 0.18          | 0.014                  | 0.014                  |
| 2     | 7        | 1.84          | 0.147                  | 0.147                  | 0.28          | 0.022                  | 0.022                  |
| 2     | 8        | 2.12          | 0.170                  | 0.170                  | 0.29          | 0.023                  | 0.023                  |
| 3     | 1        | 0.31          | 0.025                  | 0.025                  | 0.11          | 0.009                  | 0.009                  |
| 3     | 2        | 0.26          | 0.021                  | 0.021                  | 0.08          | 0.006                  | 0.006                  |
| 3     | 3        | 0.34          | 0.027                  | 0.027                  | 0.07          | 0.006                  | 0.006                  |
| 3     | 4        | 0.36          | 0.028                  | 0.028                  | 0.08          | 0.007                  | 0.007                  |
| 3     | 5        | 0.38          | 0.030                  | 0.030                  | 0.17          | 0.014                  | 0.014                  |
| 3     | 6        | 0.39          | 0.031                  | 0.031                  | 0.20          | 0.016                  | 0.016                  |
| 3     | 7        | 0.70          | 0.056                  | 0.056                  | 0.34          | 0.027                  | 0.027                  |
| 3     | 8        | 0.57          | 0.046                  | 0.046                  | 0.35          | 0.028                  | 0.028                  |
| 4     | 1        | 0.30          | 0.024                  | 0.024                  | 0.08          | 0.006                  | 0.006                  |
| 4     | 2        | <0.20         | 0.000                  | 0.016                  | 0.07          | 0.006                  | 0.006                  |
| 4     | 3        | <0.20         | 0.000                  | 0.016                  | 0.07          | 0.005                  | 0.005                  |
| 4     | 4        | <0.20         | 0.000                  | 0.016                  | 0.10          | 0.008                  | 0.008                  |
| 4     | 5        | <0.20         | 0.000                  | 0.016                  | 0.18          | 0.014                  | 0.014                  |
| 4     | 6        | <0.20         | 0.000                  | 0.016                  | 0.22          | 0.017                  | 0.017                  |
| 4     | 7        | 0.35          | 0.028                  | 0.028                  | 0.50          | 0.040                  | 0.040                  |
| 4     | 8        | 0.30          | 0.024                  | 0.024                  | 0.40          | 0.032                  | 0.032                  |
| 5     | 1        | 2.83          | 0.226                  | 0.226                  | 0.11          | 0.009                  | 0.009                  |
| 5     | 2        | 1.53          | 0.122                  | 0.122                  | 0.11          | 0.009                  | 0.009                  |
| 5     | 3        | 1.47          | 0.118                  | 0.118                  | 0.12          | 0.009                  | 0.009                  |
| 5     | 4        | 1.46          | 0.117                  | 0.117                  | 0.13          | 0.010                  | 0.010                  |
| 5     | 5        | 2.25          | 0.180                  | 0.180                  | 0.26          | 0.021                  | 0.021                  |
| 5     | 6        | 2.05          | 0.164                  | 0.164                  | 0.32          | 0.026                  | 0.026                  |
| 5     | 7        | 4.21          | 0.337                  | 0.337                  | 0.48          | 0.038                  | 0.038                  |
| 5     | 8        | 3.74          | 0.300                  | 0.300                  | 0.41          | 0.033                  | 0.033                  |
|       |          |               | Σ min                  | Σ max                  |               | Σ min                  | Σ max                  |
| 1     |          |               | 0.131                  | 0.163                  |               |                        |                        |
| 2     |          |               | 0.526                  | 0.526                  |               | 0.106                  | 0.106                  |
| 3     |          |               | 0.264                  | 0.264                  |               | 0.112                  | 0.112                  |
| 4     |          |               | 0.076                  | 0.156                  |               | 0.129                  | 0.129                  |
| 5     |          |               | 1.563                  | 1.563                  |               | 0.155                  | 0.155                  |
| Mean  |          |               | 0.512                  | 0.535                  |               | 0.125                  | 0.125                  |
| SD    |          |               | 0.613                  | 0.594                  |               | 0.022                  | 0.022                  |

**Table G.** Continued CUS.

| Stone | Fraction | LAB 1              | min                    | max                    | LAB 2              | min                    | max                    |
|-------|----------|--------------------|------------------------|------------------------|--------------------|------------------------|------------------------|
|       |          | CUS1<br>Cr<br>µg/l | r<br>mg/m <sup>2</sup> | r<br>mg/m <sup>2</sup> | CUS1<br>Cr<br>µg/l | r<br>mg/m <sup>2</sup> | r<br>mg/m <sup>2</sup> |
| 1     | 1        | 0.06               | 0.005                  | 0.005                  | <0.09              | 0.000                  | 0.007                  |
| 1     | 2        | 0.08               | 0.007                  | 0.007                  | <0.09              | 0.000                  | 0.007                  |
| 1     | 3        | 0.08               | 0.007                  | 0.007                  | <0.09              | 0.000                  | 0.007                  |
| 1     | 4        | <0.06              | 0.000                  | 0.005                  | <0.09              | 0.000                  | 0.007                  |
| 1     | 5        | 0.08               | 0.006                  | 0.006                  | <0.09              | 0.000                  | 0.007                  |
| 1     | 6        | 0.09               | 0.007                  | 0.007                  | <0.09              | 0.000                  | 0.007                  |
| 1     | 7        | <0.06              | 0.000                  | 0.005                  | <0.09              | 0.000                  | 0.007                  |
| 1     | 8        | <0.06              | 0.000                  | 0.005                  | <0.09              | 0.000                  | 0.007                  |
| 2     | 1        | 0.10               | 0.008                  | 0.008                  | <0.09              | 0.000                  | 0.007                  |
| 2     | 2        | 0.08               | 0.007                  | 0.007                  | <0.09              | 0.000                  | 0.007                  |
| 2     | 3        | <0.06              | 0.000                  | 0.005                  | <0.09              | 0.000                  | 0.007                  |
| 2     | 4        | 0.07               | 0.006                  | 0.006                  | <0.09              | 0.000                  | 0.007                  |
| 2     | 5        | <0.06              | 0.000                  | 0.005                  | <0.09              | 0.000                  | 0.007                  |
| 2     | 6        | <0.06              | 0.000                  | 0.005                  | <0.09              | 0.000                  | 0.007                  |
| 2     | 7        | 0.18               | 0.014                  | 0.014                  | <0.09              | 0.000                  | 0.007                  |
| 2     | 8        | <0.06              | 0.000                  | 0.005                  | <0.09              | 0.000                  | 0.007                  |
| 3     | 1        | 0.10               | 0.008                  | 0.008                  | <0.09              | 0.000                  | 0.007                  |
| 3     | 2        | 0.06               | 0.005                  | 0.005                  | <0.09              | 0.000                  | 0.007                  |
| 3     | 3        | 0.08               | 0.006                  | 0.006                  | <0.09              | 0.000                  | 0.007                  |
| 3     | 4        | <0.06              | 0.000                  | 0.005                  | <0.09              | 0.000                  | 0.007                  |
| 3     | 5        | <0.06              | 0.000                  | 0.005                  | <0.09              | 0.000                  | 0.007                  |
| 3     | 6        | 0.08               | 0.006                  | 0.006                  | <0.09              | 0.000                  | 0.007                  |
| 3     | 7        | <0.06              | 0.000                  | 0.005                  | <0.09              | 0.000                  | 0.007                  |
| 3     | 8        | <0.06              | 0.000                  | 0.005                  | <0.09              | 0.000                  | 0.007                  |
| 4     | 1        | 0.13               | 0.010                  | 0.010                  | <0.09              | 0.000                  | 0.007                  |
| 4     | 2        | 0.06               | 0.005                  | 0.005                  | <0.09              | 0.000                  | 0.007                  |
| 4     | 3        | 0.07               | 0.005                  | 0.005                  | <0.09              | 0.000                  | 0.007                  |
| 4     | 4        | 0.06               | 0.004                  | 0.004                  | <0.09              | 0.000                  | 0.007                  |
| 4     | 5        | <0.06              | 0.000                  | 0.005                  | <0.09              | 0.000                  | 0.007                  |
| 4     | 6        | <0.06              | 0.000                  | 0.005                  | <0.09              | 0.007                  | 0.007                  |
| 4     | 7        | <0.06              | 0.000                  | 0.005                  | <0.09              | 0.000                  | 0.007                  |
| 4     | 8        | <0.06              | 0.000                  | 0.005                  | <0.09              | 0.000                  | 0.007                  |
| 5     | 1        | 0.12               | 0.009                  | 0.009                  | <0.09              | 0.000                  | 0.007                  |
| 5     | 2        | 0.06               | 0.005                  | 0.005                  | <0.09              | 0.000                  | 0.007                  |
| 5     | 3        | 0.07               | 0.005                  | 0.005                  | <0.09              | 0.000                  | 0.007                  |
| 5     | 4        | 0.06               | 0.005                  | 0.005                  | <0.09              | 0.000                  | 0.007                  |
| 5     | 5        | 0.07               | 0.006                  | 0.006                  | <0.09              | 0.000                  | 0.007                  |
| 5     | 6        | 0.07               | 0.006                  | 0.006                  | <0.09              | 0.000                  | 0.007                  |
| 5     | 7        | <0.06              | 0.000                  | 0.005                  | <0.09              | 0.000                  | 0.007                  |
| 5     | 8        | 0.09               | 0.007                  | 0.007                  | <0.09              | 0.000                  | 0.007                  |
|       |          |                    | Σ min                  | Σ max                  |                    | Σ min                  | Σ max                  |
| 1     |          |                    | 0.031                  | 0.046                  |                    | 0.000                  | 0.057                  |
| 2     |          |                    | 0.035                  | 0.054                  |                    | 0.000                  | 0.058                  |
| 3     |          |                    | 0.026                  | 0.045                  |                    | 0.000                  | 0.058                  |
| 4     |          |                    | 0.025                  | 0.044                  |                    | 0.007                  | 0.058                  |
| 5     |          |                    | 0.043                  | 0.048                  |                    | 0.000                  | 0.058                  |
| Mean  |          |                    | 0.032                  | 0.047                  |                    | 0.001                  | 0.058                  |
| SD    |          |                    | 0.007                  | 0.004                  |                    | 0.003                  | 0.000                  |

**Table G.** Continued CUS.

| Stone | Fraction | LAB 2<br>CUS2 | min                    | max                    | LAB 2<br>CUS3 | min                    | max                    |
|-------|----------|---------------|------------------------|------------------------|---------------|------------------------|------------------------|
|       |          | Cr<br>µg/l    | r<br>mg/m <sup>2</sup> | r<br>mg/m <sup>2</sup> | Cr<br>µg/l    | r<br>mg/m <sup>2</sup> | r<br>mg/m <sup>2</sup> |
| 1     | 1        | <0.21         | 0.000                  | 0.017                  |               |                        |                        |
| 1     | 2        | <0.21         | 0.000                  | 0.017                  |               |                        |                        |
| 1     | 3        | <0.21         | 0.000                  | 0.017                  |               |                        |                        |
| 1     | 4        | <0.21         | 0.000                  | 0.017                  |               |                        |                        |
| 1     | 5        | <0.21         | 0.000                  | 0.017                  |               |                        |                        |
| 1     | 6        | <0.21         | 0.000                  | 0.017                  |               |                        |                        |
| 1     | 7        | <0.21         | 0.000                  | 0.017                  |               |                        |                        |
| 1     | 8        | <0.21         | 0.000                  | 0.017                  |               |                        |                        |
| 2     | 1        | <0.21         | 0.000                  | 0.017                  | <0.09         | 0.000                  | 0.007                  |
| 2     | 2        | <0.21         | 0.000                  | 0.017                  | <0.09         | 0.000                  | 0.007                  |
| 2     | 3        | <0.21         | 0.000                  | 0.017                  | <0.09         | 0.000                  | 0.007                  |
| 2     | 4        | <0.21         | 0.000                  | 0.017                  | <0.09         | 0.000                  | 0.007                  |
| 2     | 5        | <0.21         | 0.000                  | 0.017                  | <0.09         | 0.000                  | 0.007                  |
| 2     | 6        | <0.21         | 0.000                  | 0.017                  | <0.09         | 0.000                  | 0.007                  |
| 2     | 7        | <0.21         | 0.000                  | 0.017                  | <0.09         | 0.000                  | 0.007                  |
| 2     | 8        | <0.21         | 0.000                  | 0.017                  | <0.09         | 0.000                  | 0.007                  |
| 3     | 1        | <0.21         | 0.000                  | 0.017                  | <0.09         | 0.000                  | 0.007                  |
| 3     | 2        | <0.21         | 0.000                  | 0.017                  | <0.09         | 0.000                  | 0.007                  |
| 3     | 3        | <0.21         | 0.000                  | 0.017                  | <0.09         | 0.000                  | 0.007                  |
| 3     | 4        | <0.21         | 0.000                  | 0.017                  | <0.09         | 0.000                  | 0.007                  |
| 3     | 5        | <0.21         | 0.000                  | 0.017                  | <0.09         | 0.000                  | 0.007                  |
| 3     | 6        | <0.21         | 0.000                  | 0.017                  | <0.09         | 0.000                  | 0.007                  |
| 3     | 7        | <0.21         | 0.000                  | 0.017                  | <0.09         | 0.000                  | 0.007                  |
| 3     | 8        | <0.21         | 0.000                  | 0.017                  | <0.09         | 0.000                  | 0.007                  |
| 4     | 1        | <0.21         | 0.000                  | 0.017                  | <0.09         | 0.000                  | 0.007                  |
| 4     | 2        | <0.21         | 0.000                  | 0.017                  | <0.09         | 0.000                  | 0.007                  |
| 4     | 3        | <0.21         | 0.000                  | 0.017                  | <0.09         | 0.000                  | 0.007                  |
| 4     | 4        | <0.21         | 0.000                  | 0.017                  | <0.09         | 0.000                  | 0.007                  |
| 4     | 5        | <0.21         | 0.000                  | 0.017                  | <0.09         | 0.000                  | 0.007                  |
| 4     | 6        | <0.21         | 0.000                  | 0.017                  | <0.09         | 0.000                  | 0.007                  |
| 4     | 7        | <0.21         | 0.000                  | 0.017                  | <0.09         | 0.000                  | 0.007                  |
| 4     | 8        | <0.21         | 0.000                  | 0.017                  | <0.09         | 0.000                  | 0.007                  |
| 5     | 1        | <0.21         | 0.000                  | 0.017                  | <0.09         | 0.000                  | 0.007                  |
| 5     | 2        | <0.21         | 0.000                  | 0.017                  | <0.09         | 0.000                  | 0.007                  |
| 5     | 3        | <0.21         | 0.000                  | 0.017                  | <0.09         | 0.000                  | 0.007                  |
| 5     | 4        | <0.21         | 0.000                  | 0.017                  | <0.09         | 0.000                  | 0.007                  |
| 5     | 5        | <0.21         | 0.000                  | 0.017                  | <0.09         | 0.000                  | 0.007                  |
| 5     | 6        | <0.21         | 0.000                  | 0.017                  | <0.09         | 0.000                  | 0.007                  |
| 5     | 7        | <0.21         | 0.000                  | 0.017                  | <0.09         | 0.000                  | 0.007                  |
| 5     | 8        | <0.21         | 0.000                  | 0.017                  | <0.09         | 0.000                  | 0.007                  |
|       |          |               | Σ min                  | Σ max                  |               | Σ min                  | Σ max                  |
| 1     |          |               | 0.000                  | 0.134                  |               |                        |                        |
| 2     |          |               | 0.000                  | 0.134                  |               | 0.000                  | 0.058                  |
| 3     |          |               | 0.000                  | 0.134                  |               | 0.000                  | 0.058                  |
| 4     |          |               | 0.000                  | 0.134                  |               | 0.000                  | 0.058                  |
| 5     |          |               | 0.000                  | 0.134                  |               | 0.000                  | 0.058                  |
| Mean  |          |               | 0.000                  | 0.134                  |               | 0.000                  | 0.058                  |
| SD    |          |               | 0.000                  | 0.000                  |               | 0.000                  | 0.000                  |

**Table G.** Continued CUS.

| Stone | Fraction | LAB 1              | min                    | max                    | LAB 2              | min                    | max                    |
|-------|----------|--------------------|------------------------|------------------------|--------------------|------------------------|------------------------|
|       |          | CUS1<br>Cu<br>µg/l | r<br>mg/m <sup>2</sup> | r<br>mg/m <sup>2</sup> | CUS1<br>Cu<br>µg/l | r<br>mg/m <sup>2</sup> | r<br>mg/m <sup>2</sup> |
| 1     | 1        | 8.88               | 0.71                   | 0.71                   | 27.16              | 2.17                   | 2.17                   |
| 1     | 2        | 7.97               | 0.64                   | 0.64                   | 7.14               | 0.57                   | 0.57                   |
| 1     | 3        | 8.59               | 0.69                   | 0.69                   | 18.51              | 1.48                   | 1.48                   |
| 1     | 4        | 15.25              | 1.22                   | 1.22                   | 36.96              | 2.95                   | 2.95                   |
| 1     | 5        | 21.39              | 1.71                   | 1.71                   | 79.90              | 6.38                   | 6.38                   |
| 1     | 6        | 17.84              | 1.43                   | 1.43                   | 89.25              | 7.13                   | 7.13                   |
| 1     | 7        | 49.50              | 3.96                   | 3.96                   | 105.67             | 8.44                   | 8.44                   |
| 1     | 8        | 27.40              | 2.19                   | 2.19                   | 105.42             | 8.42                   | 8.42                   |
| 2     | 1        | 13.59              | 1.09                   | 1.09                   | 4.36               | 0.35                   | 0.35                   |
| 2     | 2        | 9.35               | 0.75                   | 0.75                   | 2.43               | 0.19                   | 0.19                   |
| 2     | 3        | 5.04               | 0.40                   | 0.40                   | 6.81               | 0.54                   | 0.54                   |
| 2     | 4        | 13.52              | 1.08                   | 1.08                   | 17.58              | 1.41                   | 1.41                   |
| 2     | 5        | 22.81              | 1.82                   | 1.82                   | 64.18              | 5.13                   | 5.13                   |
| 2     | 6        | 14.67              | 1.17                   | 1.17                   | 94.70              | 7.57                   | 7.57                   |
| 2     | 7        | 44.42              | 3.55                   | 3.55                   | 129.76             | 10.38                  | 10.38                  |
| 2     | 8        | 34.97              | 2.80                   | 2.80                   | 143.47             | 11.47                  | 11.47                  |
| 3     | 1        | 15.17              | 1.21                   | 1.21                   | 3.36               | 0.27                   | 0.27                   |
| 3     | 2        | 13.00              | 1.04                   | 1.04                   | 5.30               | 0.42                   | 0.42                   |
| 3     | 3        | 17.60              | 1.41                   | 1.41                   | 23.45              | 1.88                   | 1.88                   |
| 3     | 4        | 18.87              | 1.51                   | 1.51                   | 42.81              | 3.42                   | 3.42                   |
| 3     | 5        | 16.81              | 1.35                   | 1.35                   | 85.30              | 6.82                   | 6.82                   |
| 3     | 6        | 37.00              | 2.96                   | 2.96                   | 85.68              | 6.85                   | 6.85                   |
| 3     | 7        | 36.13              | 2.89                   | 2.89                   | 112.71             | 9.01                   | 9.01                   |
| 3     | 8        | 16.94              | 1.35                   | 1.35                   | 118.85             | 9.50                   | 9.50                   |
| 4     | 1        | 10.61              | 0.85                   | 0.85                   | 4.41               | 0.35                   | 0.35                   |
| 4     | 2        | 6.32               | 0.51                   | 0.51                   | 2.87               | 0.23                   | 0.23                   |
| 4     | 3        | 8.65               | 0.69                   | 0.69                   | 5.42               | 0.43                   | 0.43                   |
| 4     | 4        | 14.06              | 1.12                   | 1.12                   | 15.76              | 1.26                   | 1.26                   |
| 4     | 5        | 14.80              | 1.18                   | 1.18                   | 50.68              | 4.05                   | 4.05                   |
| 4     | 6        | 22.31              | 1.78                   | 1.78                   | 97.63              | 7.80                   | 7.80                   |
| 4     | 7        | 22.64              | 1.81                   | 1.81                   | 153.73             | 12.28                  | 12.28                  |
| 4     | 8        | 13.94              | 1.11                   | 1.11                   | 169.83             | 13.57                  | 13.57                  |
| 5     | 1        | 44.11              | 3.53                   | 3.53                   | 5.21               | 0.42                   | 0.42                   |
| 5     | 2        | 9.84               | 0.79                   | 0.79                   | 2.51               | 0.20                   | 0.20                   |
| 5     | 3        | 7.90               | 0.63                   | 0.63                   | 9.78               | 0.78                   | 0.78                   |
| 5     | 4        | 19.66              | 1.57                   | 1.57                   | 24.85              | 1.99                   | 1.99                   |
| 5     | 5        | 25.08              | 2.01                   | 2.01                   | 77.46              | 6.20                   | 6.20                   |
| 5     | 6        | 21.75              | 1.74                   | 1.74                   | 80.32              | 6.43                   | 6.43                   |
| 5     | 7        | 42.78              | 3.42                   | 3.42                   | 105.56             | 8.45                   | 8.45                   |
| 5     | 8        | 38.75              | 3.10                   | 3.10                   | 113.81             | 9.11                   | 9.11                   |
|       |          |                    | Σ min                  | Σ max                  |                    | Σ min                  | Σ max                  |
| 1     |          |                    | 12.54                  | 12.54                  |                    | 37.53                  | 37.53                  |
| 2     |          |                    | 12.67                  | 12.67                  |                    | 37.05                  | 37.05                  |
| 3     |          |                    | 13.72                  | 13.72                  |                    | 38.18                  | 38.18                  |
| 4     |          |                    | 9.06                   | 9.06                   |                    | 39.98                  | 39.98                  |
| 5     |          |                    | 16.79                  | 16.79                  |                    | 33.59                  | 33.59                  |
| Mean  |          |                    | 12.96                  | 12.96                  |                    | 37.27                  | 37.27                  |
| SD    |          |                    | 2.77                   | 2.77                   |                    | 2.34                   | 2.34                   |

**Table G.** Continued CUS.

| Stone | Fraction | LAB 2<br>CUS2 | min                    | max                    | LAB 2<br>CUS3 | min                    | max                    |
|-------|----------|---------------|------------------------|------------------------|---------------|------------------------|------------------------|
|       |          | Cu<br>µg/l    | r<br>mg/m <sup>2</sup> | r<br>mg/m <sup>2</sup> | Cu<br>µg/l    | r<br>mg/m <sup>2</sup> | r<br>mg/m <sup>2</sup> |
| 1     | 1        | 92.4          | 7.39                   | 7.39                   |               |                        |                        |
| 1     | 2        | 48.0          | 3.84                   | 3.84                   |               |                        |                        |
| 1     | 3        | 61.4          | 4.91                   | 4.91                   |               |                        |                        |
| 1     | 4        | 71.3          | 5.70                   | 5.70                   |               |                        |                        |
| 1     | 5        | 116           | 9.25                   | 9.25                   |               |                        |                        |
| 1     | 6        | 141           | 11.31                  | 11.31                  |               |                        |                        |
| 1     | 7        | 354           | 28.34                  | 28.34                  |               |                        |                        |
| 1     | 8        | 374           | 29.89                  | 29.89                  |               |                        |                        |
| 2     | 1        | 51.2          | 4.09                   | 4.09                   | 14.7          | 1.18                   | 1.18                   |
| 2     | 2        | 34.3          | 2.74                   | 2.74                   | 34.8          | 2.79                   | 2.79                   |
| 2     | 3        | 32.1          | 2.57                   | 2.57                   | 37.3          | 2.98                   | 2.98                   |
| 2     | 4        | 40.5          | 3.24                   | 3.24                   | 43.4          | 3.48                   | 3.48                   |
| 2     | 5        | 61.1          | 4.89                   | 4.89                   | 71.4          | 5.72                   | 5.72                   |
| 2     | 6        | 89.2          | 7.14                   | 7.14                   | 82.8          | 6.64                   | 6.64                   |
| 2     | 7        | 229           | 18.34                  | 18.34                  | 115.4         | 9.24                   | 9.24                   |
| 2     | 8        | 257           | 20.57                  | 20.57                  | 124.9         | 10.01                  | 10.01                  |
| 3     | 1        | 92.0          | 7.35                   | 7.35                   | 62.4          | 4.99                   | 4.99                   |
| 3     | 2        | 29.3          | 2.34                   | 2.34                   | 52.3          | 4.19                   | 4.19                   |
| 3     | 3        | 40.1          | 3.20                   | 3.20                   | 58.7          | 4.70                   | 4.70                   |
| 3     | 4        | 70.4          | 5.63                   | 5.63                   | 66.1          | 5.29                   | 5.29                   |
| 3     | 5        | 136           | 10.91                  | 10.91                  | 141.0         | 11.29                  | 11.29                  |
| 3     | 6        | 136           | 10.84                  | 10.84                  | 136.8         | 10.95                  | 10.95                  |
| 3     | 7        | 280           | 22.37                  | 22.37                  | 180.4         | 14.44                  | 14.44                  |
| 3     | 8        | 349           | 27.93                  | 27.93                  | 199.7         | 15.99                  | 15.99                  |
| 4     | 1        | 120.3         | 9.63                   | 9.63                   | 36.0          | 2.88                   | 2.88                   |
| 4     | 2        | 37.4          | 2.99                   | 2.99                   | 65.1          | 5.21                   | 5.21                   |
| 4     | 3        | 41.9          | 3.35                   | 3.35                   | 62.5          | 5.00                   | 5.00                   |
| 4     | 4        | 55.6          | 4.45                   | 4.45                   | 92.7          | 7.41                   | 7.41                   |
| 4     | 5        | 74.2          | 5.94                   | 5.94                   | 157.4         | 12.58                  | 12.58                  |
| 4     | 6        | 100           | 8.00                   | 8.00                   | 175.6         | 14.04                  | 14.04                  |
| 4     | 7        | 227           | 18.19                  | 18.19                  | 336.5         | 26.90                  | 26.90                  |
| 4     | 8        | 287           | 22.95                  | 22.95                  | 316.0         | 25.26                  | 25.26                  |
| 5     | 1        | 169           | 13.51                  | 13.51                  | 41.9          | 3.35                   | 3.35                   |
| 5     | 2        | 67.5          | 5.40                   | 5.40                   | 62.1          | 4.97                   | 4.97                   |
| 5     | 3        | 74.4          | 5.96                   | 5.96                   | 67.4          | 5.39                   | 5.39                   |
| 5     | 4        | 86.0          | 6.88                   | 6.88                   | 70.9          | 5.67                   | 5.67                   |
| 5     | 5        | 141           | 11.32                  | 11.32                  | 144.6         | 11.57                  | 11.57                  |
| 5     | 6        | 165           | 13.22                  | 13.22                  | 181.9         | 14.55                  | 14.55                  |
| 5     | 7        | 430           | 34.43                  | 34.43                  | 223.8         | 17.91                  | 17.91                  |
| 5     | 8        | 680           | 54.40                  | 54.40                  | 234.2         | 18.74                  | 18.74                  |
|       |          |               | Σ min                  | Σ max                  |               | Σ min                  | Σ max                  |
| 1     |          |               | 100.6                  | 100.6                  |               |                        |                        |
| 2     |          |               | 63.6                   | 63.6                   |               | 42.04                  | 42.04                  |
| 3     |          |               | 90.6                   | 90.6                   |               | 71.85                  | 71.85                  |
| 4     |          |               | 75.5                   | 75.5                   |               | 99.27                  | 99.27                  |
| 5     |          |               | 145.1                  | 145.1                  |               | 82.14                  | 82.14                  |
| Mean  |          |               | 95.1                   | 95.1                   |               | 73.82                  | 73.82                  |
| SD    |          |               | 31.3                   | 31.3                   |               | 24.02                  | 24.02                  |

**Table G.** Continued CUS.

| Stone | Fraction | LAB 1<br>CUS1 | min                    | max                    | LAB 2<br>CUS1 | min                    | max                    |
|-------|----------|---------------|------------------------|------------------------|---------------|------------------------|------------------------|
|       |          | Mn<br>µg/l    | r<br>mg/m <sup>2</sup> | r<br>mg/m <sup>2</sup> | Mn<br>µg/l    | r<br>mg/m <sup>2</sup> | r<br>mg/m <sup>2</sup> |
| 1     | 1        | 0.45          | 0.036                  | 0.036                  | 0.648         | 0.052                  | 0.052                  |
| 1     | 2        | 0.73          | 0.058                  | 0.058                  | 0.612         | 0.049                  | 0.049                  |
| 1     | 3        | 0.74          | 0.059                  | 0.059                  | 0.827         | 0.066                  | 0.066                  |
| 1     | 4        | 0.38          | 0.030                  | 0.030                  | 0.861         | 0.069                  | 0.069                  |
| 1     | 5        | 0.71          | 0.056                  | 0.056                  | 1.278         | 0.102                  | 0.102                  |
| 1     | 6        | 1.07          | 0.085                  | 0.085                  | 0.989         | 0.079                  | 0.079                  |
| 1     | 7        | 1.73          | 0.139                  | 0.139                  | 1.041         | 0.083                  | 0.083                  |
| 1     | 8        | 1.06          | 0.085                  | 0.085                  | 0.853         | 0.068                  | 0.068                  |
| 2     | 1        | 0.65          | 0.052                  | 0.052                  | 0.842         | 0.067                  | 0.067                  |
| 2     | 2        | 1.28          | 0.102                  | 0.102                  | 1.076         | 0.086                  | 0.086                  |
| 2     | 3        | 1.57          | 0.125                  | 0.125                  | 1.814         | 0.145                  | 0.145                  |
| 2     | 4        | 1.31          | 0.105                  | 0.105                  | 2.124         | 0.170                  | 0.170                  |
| 2     | 5        | 1.59          | 0.127                  | 0.127                  | 3.713         | 0.297                  | 0.297                  |
| 2     | 6        | 1.42          | 0.114                  | 0.114                  | 2.439         | 0.195                  | 0.195                  |
| 2     | 7        | 3.76          | 0.301                  | 0.301                  | 2.789         | 0.223                  | 0.223                  |
| 2     | 8        | 2.44          | 0.195                  | 0.195                  | 1.792         | 0.143                  | 0.143                  |
| 3     | 1        | 0.98          | 0.078                  | 0.078                  | 0.642         | 0.051                  | 0.051                  |
| 3     | 2        | 1.29          | 0.104                  | 0.104                  | 1.032         | 0.083                  | 0.083                  |
| 3     | 3        | 1.40          | 0.112                  | 0.112                  | 1.870         | 0.150                  | 0.150                  |
| 3     | 4        | 1.44          | 0.115                  | 0.115                  | 1.541         | 0.123                  | 0.123                  |
| 3     | 5        | 1.85          | 0.148                  | 0.148                  | 2.325         | 0.186                  | 0.186                  |
| 3     | 6        | 1.74          | 0.139                  | 0.139                  | 1.470         | 0.118                  | 0.118                  |
| 3     | 7        | 3.39          | 0.271                  | 0.271                  | 1.946         | 0.156                  | 0.156                  |
| 3     | 8        | 1.63          | 0.130                  | 0.130                  | 1.854         | 0.148                  | 0.148                  |
| 4     | 1        | 0.53          | 0.043                  | 0.043                  | 0.746         | 0.060                  | 0.060                  |
| 4     | 2        | 0.67          | 0.053                  | 0.053                  | 0.378         | 0.030                  | 0.030                  |
| 4     | 3        | 0.96          | 0.077                  | 0.077                  | 0.667         | 0.053                  | 0.053                  |
| 4     | 4        | 0.56          | 0.045                  | 0.045                  | 1.027         | 0.082                  | 0.082                  |
| 4     | 5        | 0.81          | 0.065                  | 0.065                  | 2.198         | 0.176                  | 0.176                  |
| 4     | 6        | 0.87          | 0.069                  | 0.069                  | 2.116         | 0.169                  | 0.169                  |
| 4     | 7        | 1.88          | 0.150                  | 0.150                  | 2.499         | 0.200                  | 0.200                  |
| 4     | 8        | 0.98          | 0.078                  | 0.078                  | 2.226         | 0.178                  | 0.178                  |
| 5     | 1        | 1.59          | 0.128                  | 0.128                  | 0.796         | 0.064                  | 0.064                  |
| 5     | 2        | 0.86          | 0.069                  | 0.069                  | 0.459         | 0.037                  | 0.037                  |
| 5     | 3        | 1.48          | 0.118                  | 0.118                  | 0.965         | 0.077                  | 0.077                  |
| 5     | 4        | 1.22          | 0.098                  | 0.098                  | 0.720         | 0.058                  | 0.058                  |
| 5     | 5        | 1.41          | 0.113                  | 0.113                  | 0.880         | 0.070                  | 0.070                  |
| 5     | 6        | 1.26          | 0.101                  | 0.101                  | 0.539         | 0.043                  | 0.043                  |
| 5     | 7        | 2.53          | 0.203                  | 0.203                  | 0.769         | 0.062                  | 0.062                  |
| 5     | 8        | 1.60          | 0.128                  | 0.128                  | 0.831         | 0.067                  | 0.067                  |
|       |          |               | Σ min                  | Σ max                  |               | Σ min                  | Σ max                  |
| 1     |          |               | 0.549                  | 0.549                  |               | 0.568                  | 0.568                  |
| 2     |          |               | 1.121                  | 1.121                  |               | 1.327                  | 1.327                  |
| 3     |          |               | 1.099                  | 1.099                  |               | 1.014                  | 1.014                  |
| 4     |          |               | 0.581                  | 0.581                  |               | 0.948                  | 0.948                  |
| 5     |          |               | 0.956                  | 0.956                  |               | 0.477                  | 0.477                  |
| Mean  |          |               | 0.861                  | 0.861                  |               | 0.867                  | 0.867                  |
| SD    |          |               | 0.278                  | 0.278                  |               | 0.347                  | 0.347                  |

**Table G.** Continued CUS.

| Stone | Fraction | LAB 2<br>CUS2 | min                    | max                    | LAB 2<br>CUS3 | min                    | max                    |
|-------|----------|---------------|------------------------|------------------------|---------------|------------------------|------------------------|
|       |          | Mn<br>µg/l    | r<br>mg/m <sup>2</sup> | r<br>mg/m <sup>2</sup> | Mn<br>µg/l    | r<br>mg/m <sup>2</sup> | r<br>mg/m <sup>2</sup> |
| 1     | 1        | 2.19          | 0.175                  | 0.175                  |               |                        |                        |
| 1     | 2        | 0.94          | 0.075                  | 0.075                  |               |                        |                        |
| 1     | 3        | 0.72          | 0.058                  | 0.058                  |               |                        |                        |
| 1     | 4        | 0.55          | 0.044                  | 0.044                  |               |                        |                        |
| 1     | 5        | 0.68          | 0.054                  | 0.054                  |               |                        |                        |
| 1     | 6        | 0.51          | 0.041                  | 0.041                  |               |                        |                        |
| 1     | 7        | 0.89          | 0.071                  | 0.071                  |               |                        |                        |
| 1     | 8        | 0.67          | 0.053                  | 0.053                  |               |                        |                        |
| 2     | 1        | 1.32          | 0.106                  | 0.106                  | 11.1          | 0.89                   | 0.89                   |
| 2     | 2        | 0.71          | 0.057                  | 0.057                  | 15.7          | 1.26                   | 1.26                   |
| 2     | 3        | 0.63          | 0.051                  | 0.051                  | 17.2          | 1.38                   | 1.38                   |
| 2     | 4        | 0.66          | 0.053                  | 0.053                  | 19.2          | 1.54                   | 1.54                   |
| 2     | 5        | 1.08          | 0.086                  | 0.086                  | 32.9          | 2.64                   | 2.64                   |
| 2     | 6        | 3.35          | 0.268                  | 0.268                  | 36.6          | 2.93                   | 2.93                   |
| 2     | 7        | 2.66          | 0.213                  | 0.213                  | 54.8          | 4.39                   | 4.39                   |
| 2     | 8        | 2.50          | 0.200                  | 0.200                  | 49.6          | 3.97                   | 3.97                   |
| 3     | 1        | 2.48          | 0.198                  | 0.198                  | 32.0          | 2.56                   | 2.56                   |
| 3     | 2        | 3.16          | 0.253                  | 0.253                  | 37.0          | 2.96                   | 2.96                   |
| 3     | 3        | 3.15          | 0.252                  | 0.252                  | 40.8          | 3.27                   | 3.27                   |
| 3     | 4        | 2.92          | 0.234                  | 0.234                  | 50.8          | 4.07                   | 4.07                   |
| 3     | 5        | 2.63          | 0.211                  | 0.211                  | 96.6          | 7.73                   | 7.73                   |
| 3     | 6        | 2.56          | 0.205                  | 0.205                  | 99.8          | 7.99                   | 7.99                   |
| 3     | 7        | 4.01          | 0.321                  | 0.321                  | 148.8         | 11.92                  | 11.92                  |
| 3     | 8        | 3.41          | 0.273                  | 0.273                  | 132.4         | 10.60                  | 10.60                  |
| 4     | 1        | 1.87          | 0.149                  | 0.149                  | 21.7          | 1.73                   | 1.73                   |
| 4     | 2        | 0.70          | 0.056                  | 0.056                  | 32.7          | 2.61                   | 2.61                   |
| 4     | 3        | 0.50          | 0.040                  | 0.040                  | 34.4          | 2.75                   | 2.75                   |
| 4     | 4        | 0.41          | 0.033                  | 0.033                  | 53.9          | 4.31                   | 4.31                   |
| 4     | 5        | 0.51          | 0.041                  | 0.041                  | 95.6          | 7.64                   | 7.64                   |
| 4     | 6        | 0.40          | 0.032                  | 0.032                  | 88.2          | 7.05                   | 7.05                   |
| 4     | 7        | 0.75          | 0.060                  | 0.060                  | 132.2         | 10.57                  | 10.57                  |
| 4     | 8        | 0.67          | 0.053                  | 0.053                  | 86.0          | 6.88                   | 6.88                   |
| 5     | 1        | 4.89          | 0.391                  | 0.391                  | 36.2          | 2.90                   | 2.90                   |
| 5     | 2        | 2.60          | 0.208                  | 0.208                  | 38.7          | 3.10                   | 3.10                   |
| 5     | 3        | 2.24          | 0.179                  | 0.179                  | 40.3          | 3.22                   | 3.22                   |
| 5     | 4        | 1.95          | 0.156                  | 0.156                  | 43.5          | 3.48                   | 3.48                   |
| 5     | 5        | 3.10          | 0.248                  | 0.248                  | 82.3          | 6.59                   | 6.59                   |
| 5     | 6        | 2.25          | 0.180                  | 0.180                  | 81.8          | 6.54                   | 6.54                   |
| 5     | 7        | 4.13          | 0.330                  | 0.330                  | 90.0          | 7.20                   | 7.20                   |
| 5     | 8        | 4.06          | 0.325                  | 0.325                  | 65.9          | 5.28                   | 5.28                   |
|       |          |               | Σ min                  | Σ max                  |               | Σ min                  | Σ max                  |
| 1     |          |               | 0.572                  | 0.572                  |               |                        |                        |
| 2     |          |               | 1.033                  | 1.033                  |               | 19.00                  | 19.0                   |
| 3     |          |               | 1.946                  | 1.946                  |               | 51.10                  | 51.1                   |
| 4     |          |               | 0.465                  | 0.465                  |               | 43.55                  | 43.5                   |
| 5     |          |               | 2.019                  | 2.019                  |               | 38.30                  | 38.3                   |
| Mean  |          |               | 1.207                  | 1.207                  |               | 37.99                  | 37.99                  |
| SD    |          |               | 0.740                  | 0.740                  |               | 13.71                  | 13.71                  |

**Table G.** Continued CUS.

| Stone | Fraction | LAB 1<br>CUS1 | min                    | max                    | LAB 2<br>CUS1 | min                    | max                    |
|-------|----------|---------------|------------------------|------------------------|---------------|------------------------|------------------------|
|       |          | Mo<br>µg/l    | r<br>mg/m <sup>2</sup> | r<br>mg/m <sup>2</sup> | Mo<br>µg/l    | r<br>mg/m <sup>2</sup> | r<br>mg/m <sup>2</sup> |
| 1     | 1        | 2.73          | 0.219                  | 0.219                  | 1.27          | 0.101                  | 0.101                  |
| 1     | 2        | 1.28          | 0.103                  | 0.103                  | 0.95          | 0.076                  | 0.076                  |
| 1     | 3        | 0.57          | 0.046                  | 0.046                  | 0.94          | 0.075                  | 0.075                  |
| 1     | 4        | 0.50          | 0.040                  | 0.040                  | 1.05          | 0.084                  | 0.084                  |
| 1     | 5        | 0.81          | 0.065                  | 0.065                  | 2.11          | 0.169                  | 0.169                  |
| 1     | 6        | 0.98          | 0.079                  | 0.079                  | 2.19          | 0.175                  | 0.175                  |
| 1     | 7        | 2.29          | 0.183                  | 0.183                  | 4.58          | 0.365                  | 0.365                  |
| 1     | 8        | 2.11          | 0.169                  | 0.169                  | 5.26          | 0.420                  | 0.420                  |
| 2     | 1        | 1.75          | 0.140                  | 0.140                  | 1.20          | 0.096                  | 0.096                  |
| 2     | 2        | 1.10          | 0.088                  | 0.088                  | 0.95          | 0.076                  | 0.076                  |
| 2     | 3        | 1.20          | 0.096                  | 0.096                  | 0.83          | 0.066                  | 0.066                  |
| 2     | 4        | 1.04          | 0.083                  | 0.083                  | 0.84          | 0.067                  | 0.067                  |
| 2     | 5        | 1.59          | 0.127                  | 0.127                  | 1.71          | 0.137                  | 0.137                  |
| 2     | 6        | 1.97          | 0.157                  | 0.157                  | 1.65          | 0.132                  | 0.132                  |
| 2     | 7        | 4.41          | 0.353                  | 0.353                  | 3.54          | 0.283                  | 0.283                  |
| 2     | 8        | 3.72          | 0.298                  | 0.298                  | 4.21          | 0.337                  | 0.337                  |
| 3     | 1        | 2.76          | 0.220                  | 0.220                  | 2.03          | 0.163                  | 0.163                  |
| 3     | 2        | 1.89          | 0.152                  | 0.152                  | 1.06          | 0.085                  | 0.085                  |
| 3     | 3        | 2.03          | 0.162                  | 0.162                  | 0.68          | 0.054                  | 0.054                  |
| 3     | 4        | 1.79          | 0.143                  | 0.143                  | 0.68          | 0.055                  | 0.055                  |
| 3     | 5        | 2.86          | 0.229                  | 0.229                  | 1.33          | 0.107                  | 0.107                  |
| 3     | 6        | 3.52          | 0.281                  | 0.281                  | 1.28          | 0.103                  | 0.103                  |
| 3     | 7        | 7.16          | 0.573                  | 0.573                  | 2.68          | 0.214                  | 0.214                  |
| 3     | 8        | 5.70          | 0.456                  | 0.456                  | 3.13          | 0.250                  | 0.250                  |
| 4     | 1        | 1.44          | 0.115                  | 0.115                  | 2.60          | 0.208                  | 0.208                  |
| 4     | 2        | 0.91          | 0.073                  | 0.073                  | 2.78          | 0.222                  | 0.222                  |
| 4     | 3        | 0.81          | 0.064                  | 0.064                  | 2.03          | 0.162                  | 0.162                  |
| 4     | 4        | 0.67          | 0.053                  | 0.053                  | 1.76          | 0.141                  | 0.141                  |
| 4     | 5        | 1.09          | 0.087                  | 0.087                  | 2.90          | 0.232                  | 0.232                  |
| 4     | 6        | 1.39          | 0.111                  | 0.111                  | 2.42          | 0.193                  | 0.193                  |
| 4     | 7        | 3.05          | 0.244                  | 0.244                  | 4.44          | 0.355                  | 0.355                  |
| 4     | 8        | 2.54          | 0.203                  | 0.203                  | 4.94          | 0.395                  | 0.395                  |
| 5     | 1        | 1.41          | 0.112                  | 0.112                  | 2.60          | 0.208                  | 0.208                  |
| 5     | 2        | 1.20          | 0.096                  | 0.096                  | 1.96          | 0.157                  | 0.157                  |
| 5     | 3        | 1.13          | 0.090                  | 0.090                  | 1.03          | 0.082                  | 0.082                  |
| 5     | 4        | 1.09          | 0.087                  | 0.087                  | 0.88          | 0.071                  | 0.071                  |
| 5     | 5        | 1.69          | 0.135                  | 0.135                  | 1.60          | 0.128                  | 0.128                  |
| 5     | 6        | 2.10          | 0.168                  | 0.168                  | 1.43          | 0.115                  | 0.115                  |
| 5     | 7        | 4.57          | 0.366                  | 0.366                  | 3.08          | 0.246                  | 0.246                  |
| 5     | 8        | 3.76          | 0.301                  | 0.301                  | 3.745         | 0.300                  | 0.300                  |
|       |          |               | Σ min                  | Σ max                  |               | Σ min                  | Σ max                  |
| 1     |          |               | 0.90                   | 0.90                   |               | 1.46                   | 1.46                   |
| 2     |          |               | 1.34                   | 1.34                   |               | 1.19                   | 1.19                   |
| 3     |          |               | 2.22                   | 2.22                   |               | 1.03                   | 1.03                   |
| 4     |          |               | 0.95                   | 0.95                   |               | 1.91                   | 1.91                   |
| 5     |          |               | 1.36                   | 1.36                   |               | 1.31                   | 1.31                   |
| Mean  |          |               | 1.354                  | 1.354                  |               | 1.381                  | 1.381                  |
| SD    |          |               | 0.527                  | 0.527                  |               | 0.335                  | 0.335                  |

**Table G.** Continued CUS.

| Stone | Fraction | LAB 2<br>CUS2 | min                    | max                    | LAB 2<br>CUS3 | min                    | max                    |
|-------|----------|---------------|------------------------|------------------------|---------------|------------------------|------------------------|
|       |          | Mo<br>µg/l    | r<br>mg/m <sup>2</sup> | r<br>mg/m <sup>2</sup> | Mo<br>µg/l    | r<br>mg/m <sup>2</sup> | r<br>mg/m <sup>2</sup> |
| 1     | 1        | <0.31         | 0.000                  | 0.025                  |               |                        |                        |
| 1     | 2        | <0.31         | 0.000                  | 0.025                  |               |                        |                        |
| 1     | 3        | <0.31         | 0.000                  | 0.025                  |               |                        |                        |
| 1     | 4        | <0.31         | 0.000                  | 0.025                  |               |                        |                        |
| 1     | 5        | 0.35          | 0.028                  | 0.028                  |               |                        |                        |
| 1     | 6        | 0.40          | 0.032                  | 0.032                  |               |                        |                        |
| 1     | 7        | 0.77          | 0.062                  | 0.062                  |               |                        |                        |
| 1     | 8        | 0.75          | 0.060                  | 0.060                  |               |                        |                        |
| 2     | 1        | <0.31         | 0.000                  | 0.025                  | 0.93          | 0.074                  | 0.074                  |
| 2     | 2        | <0.31         | 0.000                  | 0.025                  | 0.80          | 0.064                  | 0.064                  |
| 2     | 3        | <0.31         | 0.000                  | 0.025                  | 0.84          | 0.067                  | 0.067                  |
| 2     | 4        | <0.31         | 0.000                  | 0.025                  | 0.94          | 0.075                  | 0.075                  |
| 2     | 5        | <0.31         | 0.000                  | 0.025                  | 1.72          | 0.138                  | 0.138                  |
| 2     | 6        | 0.34          | 0.027                  | 0.027                  | 1.74          | 0.139                  | 0.139                  |
| 2     | 7        | <0.31         | 0.000                  | 0.025                  | 3.41          | 0.273                  | 0.273                  |
| 2     | 8        | <0.31         | 0.000                  | 0.025                  | 2.66          | 0.213                  | 0.213                  |
| 3     | 1        | 0.53          | 0.043                  | 0.043                  | 0.93          | 0.075                  | 0.075                  |
| 3     | 2        | 0.44          | 0.035                  | 0.035                  | 0.86          | 0.069                  | 0.069                  |
| 3     | 3        | <0.31         | 0.000                  | 0.025                  | 1.04          | 0.083                  | 0.083                  |
| 3     | 4        | <0.31         | 0.000                  | 0.025                  | 1.37          | 0.110                  | 0.110                  |
| 3     | 5        | 0.35          | 0.028                  | 0.028                  | 2.56          | 0.205                  | 0.205                  |
| 3     | 6        | 0.32          | 0.026                  | 0.026                  | 2.97          | 0.238                  | 0.238                  |
| 3     | 7        | 0.58          | 0.047                  | 0.047                  | 6.27          | 0.502                  | 0.502                  |
| 3     | 8        | 0.51          | 0.041                  | 0.041                  | 5.71          | 0.457                  | 0.457                  |
| 4     | 1        | 0.32          | 0.025                  | 0.025                  | 0.94          | 0.075                  | 0.075                  |
| 4     | 2        | 0.31          | 0.025                  | 0.025                  | 1.07          | 0.085                  | 0.085                  |
| 4     | 3        | <0.31         | 0.000                  | 0.025                  | 1.13          | 0.090                  | 0.090                  |
| 4     | 4        | <0.31         | 0.000                  | 0.025                  | 1.36          | 0.109                  | 0.109                  |
| 4     | 5        | 0.58          | 0.046                  | 0.046                  | 2.54          | 0.203                  | 0.203                  |
| 4     | 6        | 0.55          | 0.044                  | 0.044                  | 2.40          | 0.192                  | 0.192                  |
| 4     | 7        | 0.94          | 0.075                  | 0.075                  | 4.57          | 0.366                  | 0.366                  |
| 4     | 8        | 0.70          | 0.056                  | 0.056                  | 3.97          | 0.317                  | 0.317                  |
| 5     | 1        | <0.31         | 0.000                  | 0.025                  | 1.23          | 0.099                  | 0.099                  |
| 5     | 2        | <0.31         | 0.000                  | 0.025                  | 0.80          | 0.064                  | 0.064                  |
| 5     | 3        | <0.31         | 0.000                  | 0.025                  | 0.82          | 0.066                  | 0.066                  |
| 5     | 4        | <0.31         | 0.000                  | 0.025                  | 0.85          | 0.068                  | 0.068                  |
| 5     | 5        | <0.31         | 0.000                  | 0.025                  | 1.53          | 0.122                  | 0.122                  |
| 5     | 6        | <0.31         | 0.000                  | 0.025                  | 1.59          | 0.127                  | 0.127                  |
| 5     | 7        | 0.43          | 0.034                  | 0.034                  | 3.03          | 0.243                  | 0.243                  |
| 5     | 8        | 0.43          | 0.034                  | 0.034                  | 2.51          | 0.201                  | 0.201                  |
|       |          |               | Σ min                  | Σ max                  |               | Σ min                  | Σ max                  |
| 1     |          |               | 0.182                  | 0.281                  |               |                        |                        |
| 2     |          |               | 0.027                  | 0.201                  |               | 1.044                  | 1.044                  |
| 3     |          |               | 0.219                  | 0.269                  |               | 1.739                  | 1.739                  |
| 4     |          |               | 0.271                  | 0.321                  |               | 1.438                  | 1.438                  |
| 5     |          |               | 0.068                  | 0.217                  |               | 0.989                  | 0.989                  |
| Mean  |          |               | 0.154                  | 0.258                  |               | 1.303                  | 1.303                  |
| SD    |          |               | 0.103                  | 0.049                  |               | 0.35                   | 0.35                   |

**Table G.** Continued CUS.

| Stone | Fraction | LAB 1<br>CUS1 | min                    | max                    | LAB 2<br>CUS1 | min                    | max                    |
|-------|----------|---------------|------------------------|------------------------|---------------|------------------------|------------------------|
|       |          | Ni<br>µg/l    | r<br>mg/m <sup>2</sup> | r<br>mg/m <sup>2</sup> | Ni<br>µg/l    | r<br>mg/m <sup>2</sup> | r<br>mg/m <sup>2</sup> |
| 1     | 1        | 0.55          | 0.044                  | 0.044                  | 1.70          | 0.136                  | 0.136                  |
| 1     | 2        | 0.74          | 0.060                  | 0.060                  | 1.26          | 0.101                  | 0.101                  |
| 1     | 3        | 1.26          | 0.101                  | 0.101                  | 2.22          | 0.178                  | 0.178                  |
| 1     | 4        | 0.99          | 0.079                  | 0.079                  | 2.42          | 0.193                  | 0.193                  |
| 1     | 5        | 2.28          | 0.182                  | 0.182                  | 4.20          | 0.335                  | 0.335                  |
| 1     | 6        | 2.91          | 0.233                  | 0.233                  | 3.35          | 0.267                  | 0.267                  |
| 1     | 7        | 13.60         | 1.088                  | 1.088                  | 4.29          | 0.342                  | 0.342                  |
| 1     | 8        | 8.65          | 0.692                  | 0.692                  | 3.56          | 0.284                  | 0.284                  |
| 2     | 1        | 0.99          | 0.079                  | 0.079                  | 0.89          | 0.071                  | 0.071                  |
| 2     | 2        | 1.21          | 0.097                  | 0.097                  | 0.96          | 0.077                  | 0.077                  |
| 2     | 3        | 1.97          | 0.158                  | 0.158                  | 2.22          | 0.178                  | 0.178                  |
| 2     | 4        | 1.87          | 0.150                  | 0.150                  | 2.93          | 0.234                  | 0.234                  |
| 2     | 5        | 3.15          | 0.252                  | 0.252                  | 6.51          | 0.520                  | 0.520                  |
| 2     | 6        | 3.49          | 0.279                  | 0.279                  | 5.83          | 0.466                  | 0.466                  |
| 2     | 7        | 11.41         | 0.912                  | 0.912                  | 8.86          | 0.709                  | 0.709                  |
| 2     | 8        | 8.59          | 0.687                  | 0.687                  | 7.22          | 0.577                  | 0.577                  |
| 3     | 1        | 0.90          | 0.072                  | 0.072                  | 0.50          | 0.040                  | 0.040                  |
| 3     | 2        | 1.04          | 0.083                  | 0.083                  | 1.04          | 0.083                  | 0.083                  |
| 3     | 3        | 1.16          | 0.093                  | 0.093                  | 2.62          | 0.210                  | 0.210                  |
| 3     | 4        | 1.18          | 0.094                  | 0.094                  | 2.71          | 0.217                  | 0.217                  |
| 3     | 5        | 2.04          | 0.163                  | 0.163                  | 5.42          | 0.433                  | 0.433                  |
| 3     | 6        | 2.11          | 0.169                  | 0.169                  | 4.16          | 0.332                  | 0.332                  |
| 3     | 7        | 5.06          | 0.405                  | 0.405                  | 6.78          | 0.542                  | 0.542                  |
| 3     | 8        | 2.41          | 0.193                  | 0.193                  | 6.53          | 0.522                  | 0.522                  |
| 4     | 1        | 0.78          | 0.062                  | 0.062                  | 4.06          | 0.324                  | 0.324                  |
| 4     | 2        | 0.97          | 0.077                  | 0.077                  | 1.95          | 0.156                  | 0.156                  |
| 4     | 3        | 1.55          | 0.124                  | 0.124                  | 4.28          | 0.342                  | 0.342                  |
| 4     | 4        | 0.99          | 0.079                  | 0.079                  | 8.23          | 0.658                  | 0.658                  |
| 4     | 5        | 2.34          | 0.187                  | 0.187                  | 20.70         | 1.654                  | 1.654                  |
| 4     | 6        | 2.38          | 0.191                  | 0.191                  | 21.14         | 1.689                  | 1.689                  |
| 4     | 7        | 7.01          | 0.561                  | 0.561                  | 28.88         | 2.308                  | 2.308                  |
| 4     | 8        | 3.70          | 0.296                  | 0.296                  | 27.94         | 2.233                  | 2.233                  |
| 5     | 1        | 1.14          | 0.091                  | 0.091                  | 0.72          | 0.057                  | 0.057                  |
| 5     | 2        | 0.59          | 0.047                  | 0.047                  | 0.57          | 0.046                  | 0.046                  |
| 5     | 3        | 0.93          | 0.074                  | 0.074                  | 1.52          | 0.121                  | 0.121                  |
| 5     | 4        | 0.76          | 0.061                  | 0.061                  | 2.13          | 0.170                  | 0.170                  |
| 5     | 5        | 1.23          | 0.098                  | 0.098                  | 4.45          | 0.356                  | 0.356                  |
| 5     | 6        | 1.28          | 0.103                  | 0.103                  | 2.97          | 0.238                  | 0.238                  |
| 5     | 7        | 4.20          | 0.336                  | 0.336                  | 4.83          | 0.387                  | 0.387                  |
| 5     | 8        | 2.36          | 0.188                  | 0.188                  | 4.31          | 0.345                  | 0.345                  |
|       |          |               | Σ min                  | Σ max                  |               | Σ min                  | Σ max                  |
| 1     |          |               | 2.478                  | 2.478                  |               | 1.837                  | 1.837                  |
| 2     |          |               | 2.615                  | 2.615                  |               | 2.833                  | 2.833                  |
| 3     |          |               | 1.272                  | 1.272                  |               | 2.380                  | 2.380                  |
| 4     |          |               | 1.578                  | 1.578                  |               | 9.365                  | 9.365                  |
| 5     |          |               | 0.999                  | 0.999                  |               | 1.721                  | 1.721                  |
| Mean  |          |               | 1.788                  | 1.788                  |               | 3.627                  | 3.627                  |
| SD    |          |               | 0.723                  | 0.723                  |               | 3.238                  | 3.238                  |

**Table G.** Continued CUS.

| Stone | Fraction | LAB 2<br>CUS2 | min                    | max                    | LAB 2<br>CUS3 | min                    | max                    |
|-------|----------|---------------|------------------------|------------------------|---------------|------------------------|------------------------|
|       |          | Ni<br>µg/l    | r<br>mg/m <sup>2</sup> | r<br>mg/m <sup>2</sup> | Ni<br>µg/l    | r<br>mg/m <sup>2</sup> | r<br>mg/m <sup>2</sup> |
| 1     | 1        | 6.09          | 0.487                  | 0.487                  |               |                        |                        |
| 1     | 2        | 3.71          | 0.297                  | 0.297                  |               |                        |                        |
| 1     | 3        | 3.31          | 0.265                  | 0.265                  |               |                        |                        |
| 1     | 4        | 3.27          | 0.261                  | 0.261                  |               |                        |                        |
| 1     | 5        | 4.72          | 0.377                  | 0.377                  |               |                        |                        |
| 1     | 6        | 4.44          | 0.355                  | 0.355                  |               |                        |                        |
| 1     | 7        | 8.50          | 0.679                  | 0.679                  |               |                        |                        |
| 1     | 8        | 7.80          | 0.623                  | 0.623                  |               |                        |                        |
| 2     | 1        | 6.95          | 0.556                  | 0.556                  | 0.94          | 0.075                  | 0.075                  |
| 2     | 2        | 3.53          | 0.282                  | 0.282                  | 1.03          | 0.082                  | 0.082                  |
| 2     | 3        | 3.16          | 0.253                  | 0.253                  | 1.04          | 0.083                  | 0.083                  |
| 2     | 4        | 3.55          | 0.284                  | 0.284                  | 1.12          | 0.089                  | 0.089                  |
| 2     | 5        | 5.80          | 0.464                  | 0.464                  | 1.61          | 0.129                  | 0.129                  |
| 2     | 6        | 8.03          | 0.642                  | 0.642                  | 1.50          | 0.120                  | 0.120                  |
| 2     | 7        | 15.6          | 1.247                  | 1.247                  | 2.25          | 0.180                  | 0.180                  |
| 2     | 8        | 17.8          | 1.425                  | 1.425                  | 1.69          | 0.135                  | 0.135                  |
| 3     | 1        | 6.32          | 0.506                  | 0.506                  | 3.60          | 0.288                  | 0.288                  |
| 3     | 2        | 4.29          | 0.343                  | 0.343                  | 2.62          | 0.209                  | 0.209                  |
| 3     | 3        | 5.22          | 0.417                  | 0.417                  | 3.04          | 0.243                  | 0.243                  |
| 3     | 4        | 5.92          | 0.474                  | 0.474                  | 3.88          | 0.311                  | 0.311                  |
| 3     | 5        | 8.11          | 0.649                  | 0.649                  | 26.70         | 2.138                  | 2.138                  |
| 3     | 6        | 8.17          | 0.653                  | 0.653                  | 8.29          | 0.664                  | 0.664                  |
| 3     | 7        | 17.5          | 1.395                  | 1.395                  | 8.43          | 0.675                  | 0.675                  |
| 3     | 8        | 17.4          | 1.394                  | 1.394                  | 5.16          | 0.413                  | 0.413                  |
| 4     | 1        | 5.03          | 0.403                  | 0.403                  | 1.67          | 0.133                  | 0.133                  |
| 4     | 2        | 2.32          | 0.185                  | 0.185                  | 1.83          | 0.146                  | 0.146                  |
| 4     | 3        | 2.01          | 0.161                  | 0.161                  | 1.66          | 0.133                  | 0.133                  |
| 4     | 4        | 2.00          | 0.160                  | 0.160                  | 5.40          | 0.431                  | 0.431                  |
| 4     | 5        | 3.00          | 0.240                  | 0.240                  | 6.31          | 0.505                  | 0.505                  |
| 4     | 6        | 3.02          | 0.242                  | 0.242                  | 2.77          | 0.221                  | 0.221                  |
| 4     | 7        | 6.90          | 0.552                  | 0.552                  | 3.64          | 0.291                  | 0.291                  |
| 4     | 8        | 7.23          | 0.579                  | 0.579                  | 2.39          | 0.191                  | 0.191                  |
| 5     | 1        | 21.3          | 1.703                  | 1.703                  | 2.28          | 0.183                  | 0.183                  |
| 5     | 2        | 13.1          | 1.048                  | 1.048                  | 2.15          | 0.172                  | 0.172                  |
| 5     | 3        | 13.1          | 1.046                  | 1.046                  | 2.22          | 0.178                  | 0.178                  |
| 5     | 4        | 13.9          | 1.115                  | 1.115                  | 2.69          | 0.215                  | 0.215                  |
| 5     | 5        | 24.1          | 1.927                  | 1.927                  | 4.44          | 0.355                  | 0.355                  |
| 5     | 6        | 23.4          | 1.873                  | 1.873                  | 3.70          | 0.296                  | 0.296                  |
| 5     | 7        | 51.9          | 4.156                  | 4.156                  | 4.28          | 0.343                  | 0.343                  |
| 5     | 8        | 57.9          | 4.629                  | 4.629                  | 2.95          | 0.236                  | 0.236                  |
|       |          |               | Σ min                  | Σ max                  |               | Σ min                  | Σ max                  |
| 1     |          |               | 3.345                  | 3.345                  |               |                        |                        |
| 2     |          |               | 5.153                  | 5.153                  |               | 0.895                  | 0.895                  |
| 3     |          |               | 5.831                  | 5.831                  |               | 4.942                  | 4.942                  |
| 4     |          |               | 2.522                  | 2.522                  |               | 2.053                  | 2.053                  |
| 5     |          |               | 17.496                 | 17.496                 |               | 1.978                  | 1.978                  |
| Mean  |          |               | 6.870                  | 6.870                  |               | 2.467                  | 2.467                  |
| SD    |          |               | 6.088                  | 6.088                  |               | 1.733                  | 1.733                  |

**Table G.** Continued CUS.

| Stone | Fraction | LAB 1              | min                    | max                    | LAB 2              | min                    | max                    |
|-------|----------|--------------------|------------------------|------------------------|--------------------|------------------------|------------------------|
|       |          | CUS1<br>Pb<br>µg/l | r<br>mg/m <sup>2</sup> | r<br>mg/m <sup>2</sup> | CUS1<br>Pb<br>µg/l | r<br>mg/m <sup>2</sup> | r<br>mg/m <sup>2</sup> |
| 1     | 1        | 0.22               | 0.018                  | 0.018                  | 0.14               | 0.011                  | 0.011                  |
| 1     | 2        | 0.14               | 0.011                  | 0.011                  | 0.13               | 0.010                  | 0.010                  |
| 1     | 3        | 0.21               | 0.017                  | 0.017                  | 0.21               | 0.017                  | 0.017                  |
| 1     | 4        | 0.16               | 0.013                  | 0.013                  | 0.25               | 0.020                  | 0.020                  |
| 1     | 5        | 0.27               | 0.022                  | 0.022                  | 0.42               | 0.033                  | 0.033                  |
| 1     | 6        | 0.29               | 0.023                  | 0.023                  | 0.49               | 0.039                  | 0.039                  |
| 1     | 7        | 4.57               | 0.365                  | 0.365                  | 0.49               | 0.039                  | 0.039                  |
| 1     | 8        | 1.00               | 0.080                  | 0.080                  | 0.46               | 0.037                  | 0.037                  |
| 2     | 1        | 0.20               | 0.016                  | 0.016                  | 0.18               | 0.014                  | 0.014                  |
| 2     | 2        | 0.11               | 0.009                  | 0.009                  | 0.11               | 0.009                  | 0.009                  |
| 2     | 3        | 0.10               | 0.008                  | 0.008                  | 0.13               | 0.010                  | 0.010                  |
| 2     | 4        | 0.12               | 0.009                  | 0.009                  | 0.22               | 0.017                  | 0.017                  |
| 2     | 5        | 0.19               | 0.015                  | 0.015                  | 0.75               | 0.060                  | 0.060                  |
| 2     | 6        | 0.24               | 0.019                  | 0.019                  | 1.37               | 0.110                  | 0.110                  |
| 2     | 7        | 3.93               | 0.315                  | 0.315                  | 1.93               | 0.154                  | 0.154                  |
| 2     | 8        | 0.95               | 0.076                  | 0.076                  | 2.26               | 0.181                  | 0.181                  |
| 3     | 1        | 0.28               | 0.022                  | 0.022                  | 0.13               | 0.010                  | 0.010                  |
| 3     | 2        | 0.07               | 0.006                  | 0.006                  | 0.28               | 0.022                  | 0.022                  |
| 3     | 3        | 0.08               | 0.006                  | 0.006                  | 0.73               | 0.058                  | 0.058                  |
| 3     | 4        | 0.07               | 0.005                  | 0.005                  | 1.18               | 0.094                  | 0.094                  |
| 3     | 5        | 0.06               | 0.005                  | 0.005                  | 2.80               | 0.224                  | 0.224                  |
| 3     | 6        | 0.08               | 0.006                  | 0.006                  | 3.16               | 0.253                  | 0.253                  |
| 3     | 7        | 0.22               | 0.018                  | 0.018                  | 2.82               | 0.226                  | 0.226                  |
| 3     | 8        | 0.05               | 0.004                  | 0.004                  | 2.73               | 0.218                  | 0.218                  |
| 4     | 1        | 0.33               | 0.027                  | 0.027                  | 0.21               | 0.017                  | 0.017                  |
| 4     | 2        | 0.10               | 0.008                  | 0.008                  | 0.33               | 0.026                  | 0.026                  |
| 4     | 3        | 0.09               | 0.007                  | 0.007                  | 0.36               | 0.029                  | 0.029                  |
| 4     | 4        | 0.11               | 0.009                  | 0.009                  | 0.51               | 0.041                  | 0.041                  |
| 4     | 5        | 0.11               | 0.009                  | 0.009                  | 1.26               | 0.101                  | 0.101                  |
| 4     | 6        | 0.15               | 0.012                  | 0.012                  | 2.18               | 0.174                  | 0.174                  |
| 4     | 7        | 1.87               | 0.150                  | 0.150                  | 2.86               | 0.228                  | 0.228                  |
| 4     | 8        | 0.78               | 0.062                  | 0.062                  | 3.36               | 0.268                  | 0.268                  |
| 5     | 1        | 0.30               | 0.024                  | 0.024                  | 0.21               | 0.017                  | 0.017                  |
| 5     | 2        | 0.08               | 0.006                  | 0.006                  | 0.19               | 0.015                  | 0.015                  |
| 5     | 3        | 0.09               | 0.007                  | 0.007                  | 0.27               | 0.022                  | 0.022                  |
| 5     | 4        | 0.08               | 0.006                  | 0.006                  | 0.50               | 0.040                  | 0.040                  |
| 5     | 5        | 0.11               | 0.009                  | 0.009                  | 2.01               | 0.161                  | 0.161                  |
| 5     | 6        | 0.09               | 0.007                  | 0.007                  | 2.58               | 0.207                  | 0.207                  |
| 5     | 7        | 0.80               | 0.064                  | 0.064                  | 3.14               | 0.251                  | 0.251                  |
| 5     | 8        | 0.47               | 0.038                  | 0.038                  | 3.20               | 0.256                  | 0.256                  |
|       |          |                    | Σ min                  | Σ max                  |                    | Σ min                  | Σ max                  |
| 1     |          |                    | 0.549                  | 0.549                  |                    | 0.206                  | 0.206                  |
| 2     |          |                    | 0.467                  | 0.467                  |                    | 0.556                  | 0.556                  |
| 3     |          |                    | 0.072                  | 0.072                  |                    | 1.105                  | 1.105                  |
| 4     |          |                    | 0.283                  | 0.283                  |                    | 0.884                  | 0.884                  |
| 5     |          |                    | 0.162                  | 0.162                  |                    | 0.969                  | 0.969                  |
| Mean  |          |                    | 0.307                  | 0.307                  |                    | 0.744                  | 0.744                  |
| SD    |          |                    | 0.201                  | 0.201                  |                    | 0.362                  | 0.362                  |

**Table G.** Continued CUS.

| Stone | Fraction | LAB 2<br>CUS2 | min                    | max                    | LAB 2<br>CUS3 | min                    | max                    |
|-------|----------|---------------|------------------------|------------------------|---------------|------------------------|------------------------|
|       |          | Pb<br>µg/l    | r<br>mg/m <sup>2</sup> | r<br>mg/m <sup>2</sup> | Pb<br>µg/l    | r<br>mg/m <sup>2</sup> | r<br>mg/m <sup>2</sup> |
| 1     | 1        | 4.2           | 0.34                   | 0.34                   |               |                        |                        |
| 1     | 2        | 8.2           | 0.65                   | 0.65                   |               |                        |                        |
| 1     | 3        | 11.9          | 0.95                   | 0.95                   |               |                        |                        |
| 1     | 4        | 15.9          | 1.27                   | 1.27                   |               |                        |                        |
| 1     | 5        | 23.4          | 1.87                   | 1.87                   |               |                        |                        |
| 1     | 6        | 30.0          | 2.40                   | 2.40                   |               |                        |                        |
| 1     | 7        | 64.6          | 5.17                   | 5.17                   |               |                        |                        |
| 1     | 8        | 72.4          | 5.79                   | 5.79                   |               |                        |                        |
| 2     | 1        | 17.6          | 1.41                   | 1.41                   | 0.38          | 0.030                  | 0.030                  |
| 2     | 2        | 24.6          | 1.97                   | 1.97                   | 0.34          | 0.027                  | 0.027                  |
| 2     | 3        | 32.8          | 2.62                   | 2.62                   | 0.38          | 0.030                  | 0.030                  |
| 2     | 4        | 46.2          | 3.70                   | 3.70                   | 0.43          | 0.035                  | 0.035                  |
| 2     | 5        | 79.9          | 6.40                   | 6.40                   | 0.63          | 0.051                  | 0.051                  |
| 2     | 6        | 14.4          | 1.15                   | 1.15                   | 1.05          | 0.084                  | 0.084                  |
| 2     | 7        | 298.3         | 23.86                  | 23.86                  | 1.93          | 0.155                  | 0.155                  |
| 2     | 8        | 321.1         | 25.68                  | 25.68                  | 4.70          | 0.377                  | 0.377                  |
| 3     | 1        | 3.2           | 0.26                   | 0.26                   | 0.17          | 0.013                  | 0.013                  |
| 3     | 2        | 3.4           | 0.27                   | 0.27                   | 1.11          | 0.089                  | 0.089                  |
| 3     | 3        | 4.6           | 0.37                   | 0.37                   | 0.20          | 0.016                  | 0.016                  |
| 3     | 4        | 10.0          | 0.80                   | 0.80                   | 0.15          | 0.012                  | 0.012                  |
| 3     | 5        | 24.5          | 1.96                   | 1.96                   | 0.38          | 0.030                  | 0.030                  |
| 3     | 6        | 24.5          | 1.96                   | 1.96                   | 0.36          | 0.029                  | 0.029                  |
| 3     | 7        | 50.4          | 4.03                   | 4.03                   | 0.54          | 0.043                  | 0.043                  |
| 3     | 8        | 68.2          | 5.46                   | 5.46                   | 0.69          | 0.055                  | 0.055                  |
| 4     | 1        | 6.1           | 0.49                   | 0.49                   | 0.26          | 0.020                  | 0.020                  |
| 4     | 2        | 6.9           | 0.56                   | 0.56                   | 0.20          | 0.016                  | 0.016                  |
| 4     | 3        | 9.6           | 0.77                   | 0.77                   | 0.19          | 0.015                  | 0.015                  |
| 4     | 4        | 14.5          | 1.16                   | 1.16                   | 0.23          | 0.018                  | 0.018                  |
| 4     | 5        | 18.5          | 1.48                   | 1.48                   | 0.86          | 0.069                  | 0.069                  |
| 4     | 6        | 28.0          | 2.24                   | 2.24                   | 0.35          | 0.028                  | 0.028                  |
| 4     | 7        | 49.9          | 3.99                   | 3.99                   | 0.92          | 0.074                  | 0.074                  |
| 4     | 8        | 67.2          | 5.38                   | 5.38                   | 1.18          | 0.094                  | 0.094                  |
| 5     | 1        | 10.0          | 0.80                   | 0.80                   | 0.23          | 0.018                  | 0.018                  |
| 5     | 2        | 10.4          | 0.83                   | 0.83                   | 0.17          | 0.014                  | 0.014                  |
| 5     | 3        | 13.3          | 1.06                   | 1.06                   | 0.25          | 0.020                  | 0.020                  |
| 5     | 4        | 17.7          | 1.41                   | 1.41                   | 0.16          | 0.012                  | 0.012                  |
| 5     | 5        | 21.8          | 1.75                   | 1.75                   | 0.13          | 0.010                  | 0.010                  |
| 5     | 6        | 29.4          | 2.35                   | 2.35                   | 0.46          | 0.037                  | 0.037                  |
| 5     | 7        | 49.0          | 3.92                   | 3.92                   | 0.55          | 0.044                  | 0.044                  |
| 5     | 8        | 66.3          | 5.31                   | 5.31                   | 1.12          | 0.090                  | 0.090                  |
|       |          |               | Σ min                  | Σ max                  |               | Σ min                  | Σ max                  |
| 1     |          |               | 18.43                  | 18.43                  |               |                        |                        |
| 2     |          |               | 66.79                  | 66.79                  |               | 0.789                  | 0.789                  |
| 3     |          |               | 15.10                  | 15.10                  |               | 0.289                  | 0.289                  |
| 4     |          |               | 16.08                  | 16.08                  |               | 0.335                  | 0.335                  |
| 5     |          |               | 17.43                  | 17.43                  |               | 0.245                  | 0.245                  |
| Mean  |          |               | 26.77                  | 26.77                  |               | 0.415                  | 0.415                  |
| SD    |          |               | 22.41                  | 22.41                  |               | 0.253                  | 0.253                  |

**Table G.** Continued CUS.

| Stone | Fraction | LAB 1              | min                    | max                    | LAB 2              | min                    | max                    |
|-------|----------|--------------------|------------------------|------------------------|--------------------|------------------------|------------------------|
|       |          | CUS1<br>Sb<br>µg/l | r<br>mg/m <sup>2</sup> | r<br>mg/m <sup>2</sup> | CUS1<br>Sb<br>µg/l | r<br>mg/m <sup>2</sup> | r<br>mg/m <sup>2</sup> |
| 1     | 1        | 0.10               | 0.008                  | 0.008                  | <0.45              | 0.000                  | 0.036                  |
| 1     | 2        | 0.14               | 0.011                  | 0.011                  | <0.45              | 0.000                  | 0.036                  |
| 1     | 3        | 0.19               | 0.015                  | 0.015                  | <0.45              | 0.000                  | 0.036                  |
| 1     | 4        | 0.19               | 0.015                  | 0.015                  | <0.45              | 0.000                  | 0.036                  |
| 1     | 5        | 0.35               | 0.028                  | 0.028                  | <0.45              | 0.000                  | 0.036                  |
| 1     | 6        | 0.39               | 0.031                  | 0.031                  | <0.45              | 0.000                  | 0.036                  |
| 1     | 7        | 0.98               | 0.079                  | 0.079                  | <0.45              | 0.000                  | 0.036                  |
| 1     | 8        | 0.60               | 0.048                  | 0.048                  | <0.45              | 0.000                  | 0.036                  |
| 2     | 1        | 0.13               | 0.011                  | 0.011                  | <0.45              | 0.000                  | 0.036                  |
| 2     | 2        | 0.16               | 0.013                  | 0.013                  | <0.45              | 0.000                  | 0.036                  |
| 2     | 3        | 0.25               | 0.020                  | 0.020                  | <0.45              | 0.000                  | 0.036                  |
| 2     | 4        | 0.31               | 0.025                  | 0.025                  | <0.45              | 0.000                  | 0.036                  |
| 2     | 5        | 0.46               | 0.037                  | 0.037                  | <0.45              | 0.000                  | 0.036                  |
| 2     | 6        | 0.49               | 0.040                  | 0.040                  | <0.45              | 0.000                  | 0.036                  |
| 2     | 7        | 1.07               | 0.086                  | 0.086                  | 0.46               | 0.037                  | 0.037                  |
| 2     | 8        | 0.78               | 0.062                  | 0.062                  | <0.45              | 0.000                  | 0.036                  |
| 3     | 1        | 0.11               | 0.009                  | 0.009                  | <0.45              | 0.000                  | 0.036                  |
| 3     | 2        | 0.13               | 0.010                  | 0.010                  | <0.45              | 0.000                  | 0.036                  |
| 3     | 3        | 0.17               | 0.014                  | 0.014                  | <0.45              | 0.000                  | 0.036                  |
| 3     | 4        | 0.21               | 0.016                  | 0.016                  | <0.45              | 0.000                  | 0.036                  |
| 3     | 5        | 0.34               | 0.027                  | 0.027                  | <0.45              | 0.000                  | 0.036                  |
| 3     | 6        | 0.41               | 0.033                  | 0.033                  | <0.45              | 0.000                  | 0.036                  |
| 3     | 7        | 1.02               | 0.082                  | 0.082                  | <0.45              | 0.000                  | 0.036                  |
| 3     | 8        | 0.67               | 0.054                  | 0.054                  | <0.45              | 0.000                  | 0.036                  |
| 4     | 1        | 0.11               | 0.009                  | 0.009                  | <0.45              | 0.000                  | 0.036                  |
| 4     | 2        | 0.14               | 0.011                  | 0.011                  | <0.45              | 0.000                  | 0.036                  |
| 4     | 3        | 0.19               | 0.015                  | 0.015                  | <0.45              | 0.000                  | 0.036                  |
| 4     | 4        | 0.19               | 0.015                  | 0.015                  | <0.45              | 0.000                  | 0.036                  |
| 4     | 5        | 0.29               | 0.024                  | 0.024                  | <0.45              | 0.000                  | 0.036                  |
| 4     | 6        | 0.37               | 0.030                  | 0.030                  | <0.45              | 0.000                  | 0.036                  |
| 4     | 7        | 0.90               | 0.072                  | 0.072                  | 0.48               | 0.038                  | 0.038                  |
| 4     | 8        | 0.64               | 0.051                  | 0.051                  | 0.49               | 0.039                  | 0.039                  |
| 5     | 1        | 0.14               | 0.011                  | 0.011                  | <0.45              | 0.000                  | 0.036                  |
| 5     | 2        | 0.14               | 0.012                  | 0.012                  | <0.45              | 0.000                  | 0.036                  |
| 5     | 3        | 0.21               | 0.017                  | 0.017                  | <0.45              | 0.000                  | 0.036                  |
| 5     | 4        | 0.21               | 0.016                  | 0.016                  | <0.45              | 0.000                  | 0.036                  |
| 5     | 5        | 0.32               | 0.025                  | 0.025                  | <0.45              | 0.000                  | 0.036                  |
| 5     | 6        | 0.38               | 0.030                  | 0.030                  | <0.45              | 0.000                  | 0.036                  |
| 5     | 7        | 0.83               | 0.066                  | 0.066                  | <0.45              | 0.000                  | 0.036                  |
| 5     | 8        | 0.68               | 0.054                  | 0.054                  | <0.45              | 0.000                  | 0.036                  |
|       |          |                    | Σ min                  | Σ max                  |                    | Σ min                  | Σ max                  |
| 1     |          |                    | 0.235                  | 0.235                  |                    | 0.000                  | 0.287                  |
| 2     |          |                    | 0.293                  | 0.293                  |                    | 0.037                  | 0.289                  |
| 3     |          |                    | 0.246                  | 0.246                  |                    | 0.000                  | 0.288                  |
| 4     |          |                    | 0.226                  | 0.226                  |                    | 0.077                  | 0.293                  |
| 5     |          |                    | 0.232                  | 0.232                  |                    | 0.000                  | 0.288                  |
| Mean  |          |                    | 0.247                  | 0.247                  |                    | 0.023                  | 0.289                  |
| SD    |          |                    | 0.027                  | 0.027                  |                    | 0.034                  | 0.002                  |

**Table G.** Continued CUS.

| Stone | Fraction | LAB 2<br>CUS2 | min                    | max                    | LAB 2<br>CUS3 | min                    | max                    |
|-------|----------|---------------|------------------------|------------------------|---------------|------------------------|------------------------|
|       |          | Sb<br>µg/l    | r<br>mg/m <sup>2</sup> | r<br>mg/m <sup>2</sup> | Sb<br>µg/l    | r<br>mg/m <sup>2</sup> | r<br>mg/m <sup>2</sup> |
| 1     | 1        | <0.37         | 0.000                  | 0.030                  |               |                        |                        |
| 1     | 2        | <0.37         | 0.000                  | 0.030                  |               |                        |                        |
| 1     | 3        | <0.37         | 0.000                  | 0.030                  |               |                        |                        |
| 1     | 4        | <0.37         | 0.000                  | 0.030                  |               |                        |                        |
| 1     | 5        | 0.43          | 0.034                  | 0.034                  |               |                        |                        |
| 1     | 6        | 0.48          | 0.038                  | 0.038                  |               |                        |                        |
| 1     | 7        | 0.67          | 0.054                  | 0.054                  |               |                        |                        |
| 1     | 8        | 0.56          | 0.045                  | 0.045                  |               |                        |                        |
| 2     | 1        | <0.37         | 0.000                  | 0.030                  | <0.46         | 0.000                  | 0.037                  |
| 2     | 2        | <0.37         | 0.000                  | 0.030                  | <0.46         | 0.000                  | 0.037                  |
| 2     | 3        | <0.37         | 0.000                  | 0.030                  | <0.46         | 0.000                  | 0.037                  |
| 2     | 4        | <0.37         | 0.000                  | 0.030                  | <0.46         | 0.000                  | 0.037                  |
| 2     | 5        | 0.43          | 0.034                  | 0.034                  | <0.46         | 0.000                  | 0.037                  |
| 2     | 6        | 0.42          | 0.033                  | 0.033                  | <0.46         | 0.000                  | 0.037                  |
| 2     | 7        | 0.90          | 0.072                  | 0.072                  | <0.46         | 0.000                  | 0.037                  |
| 2     | 8        | 0.88          | 0.071                  | 0.071                  | <0.46         | 0.000                  | 0.037                  |
| 3     | 1        | <0.37         | 0.000                  | 0.030                  | <0.46         | 0.000                  | 0.037                  |
| 3     | 2        | <0.37         | 0.000                  | 0.030                  | <0.46         | 0.000                  | 0.037                  |
| 3     | 3        | <0.37         | 0.000                  | 0.030                  | <0.46         | 0.000                  | 0.037                  |
| 3     | 4        | <0.37         | 0.000                  | 0.030                  | <0.46         | 0.000                  | 0.037                  |
| 3     | 5        | 0.43          | 0.035                  | 0.035                  | <0.46         | 0.000                  | 0.037                  |
| 3     | 6        | 0.43          | 0.034                  | 0.034                  | <0.46         | 0.000                  | 0.037                  |
| 3     | 7        | 0.58          | 0.046                  | 0.046                  | <0.46         | 0.000                  | 0.037                  |
| 3     | 8        | 0.64          | 0.051                  | 0.051                  | <0.46         | 0.000                  | 0.037                  |
| 4     | 1        | <0.37         | 0.000                  | 0.030                  | <0.46         | 0.000                  | 0.037                  |
| 4     | 2        | <0.37         | 0.000                  | 0.030                  | <0.46         | 0.000                  | 0.037                  |
| 4     | 3        | <0.37         | 0.000                  | 0.030                  | <0.46         | 0.000                  | 0.037                  |
| 4     | 4        | <0.37         | 0.000                  | 0.030                  | <0.46         | 0.000                  | 0.037                  |
| 4     | 5        | <0.37         | 0.000                  | 0.030                  | <0.46         | 0.000                  | 0.037                  |
| 4     | 6        | <0.37         | 0.000                  | 0.030                  | <0.46         | 0.000                  | 0.037                  |
| 4     | 7        | 0.44          | 0.035                  | 0.035                  | <0.46         | 0.000                  | 0.037                  |
| 4     | 8        | 0.41          | 0.033                  | 0.033                  | <0.46         | 0.000                  | 0.037                  |
| 5     | 1        | <0.37         | 0.000                  | 0.030                  | <0.46         | 0.000                  | 0.037                  |
| 5     | 2        | <0.37         | 0.000                  | 0.030                  | <0.46         | 0.000                  | 0.037                  |
| 5     | 3        | <0.37         | 0.000                  | 0.030                  | <0.46         | 0.000                  | 0.037                  |
| 5     | 4        | <0.37         | 0.000                  | 0.030                  | <0.46         | 0.000                  | 0.037                  |
| 5     | 5        | <0.37         | 0.000                  | 0.030                  | <0.46         | 0.000                  | 0.037                  |
| 5     | 6        | <0.37         | 0.000                  | 0.030                  | <0.46         | 0.000                  | 0.037                  |
| 5     | 7        | <0.37         | 0.000                  | 0.030                  | <0.46         | 0.000                  | 0.037                  |
| 5     | 8        | <0.37         | 0.000                  | 0.030                  | <0.46         | 0.000                  | 0.037                  |
|       |          |               | Σ min                  | Σ max                  |               | Σ min                  | Σ max                  |
| 1     |          |               | 0.171                  | 0.290                  |               |                        |                        |
| 2     |          |               | 0.210                  | 0.328                  |               | 0.000                  | 0.295                  |
| 3     |          |               | 0.166                  | 0.285                  |               | 0.000                  | 0.295                  |
| 4     |          |               | 0.068                  | 0.245                  |               | 0.000                  | 0.294                  |
| 5     |          |               | 0.000                  | 0.237                  |               | 0.000                  | 0.294                  |
| Mean  |          |               | 0.123                  | 0.277                  |               | 0.000                  | 0.295                  |
| SD    |          |               | 0.09                   | 0.04                   |               | 0.000                  | 0.000                  |

**Table G.** Continued CUS.

| Stone | Fraction | LAB 1              | min                    | max                    | LAB 2              | min                    | max                    |
|-------|----------|--------------------|------------------------|------------------------|--------------------|------------------------|------------------------|
|       |          | CUS1<br>Se<br>µg/l | r<br>mg/m <sup>2</sup> | r<br>mg/m <sup>2</sup> | CUS1<br>Se<br>µg/l | r<br>mg/m <sup>2</sup> | r<br>mg/m <sup>2</sup> |
| 1     | 1        | 0.07               | 0.006                  | 0.006                  | <0.26              | 0.000                  | 0.021                  |
| 1     | 2        | <0.04              | 0.000                  | 0.003                  | <0.26              | 0.000                  | 0.021                  |
| 1     | 3        | <0.04              | 0.000                  | 0.003                  | <0.26              | 0.000                  | 0.021                  |
| 1     | 4        | <0.04              | 0.000                  | 0.003                  | <0.26              | 0.000                  | 0.021                  |
| 1     | 5        | <0.04              | 0.000                  | 0.003                  | <0.26              | 0.000                  | 0.021                  |
| 1     | 6        | <0.04              | 0.000                  | 0.003                  | <0.26              | 0.000                  | 0.021                  |
| 1     | 7        | 0.06               | 0.005                  | 0.005                  | <0.26              | 0.000                  | 0.021                  |
| 1     | 8        | <0.04              | 0.000                  | 0.003                  | <0.26              | 0.000                  | 0.021                  |
| 2     | 1        | 0.07               | 0.005                  | 0.005                  | <0.26              | 0.000                  | 0.021                  |
| 2     | 2        | <0.04              | 0.000                  | 0.003                  | <0.26              | 0.000                  | 0.021                  |
| 2     | 3        | <0.04              | 0.000                  | 0.003                  | <0.26              | 0.000                  | 0.021                  |
| 2     | 4        | <0.04              | 0.000                  | 0.003                  | <0.26              | 0.000                  | 0.021                  |
| 2     | 5        | <0.04              | 0.000                  | 0.003                  | <0.26              | 0.000                  | 0.021                  |
| 2     | 6        | <0.04              | 0.000                  | 0.003                  | <0.26              | 0.000                  | 0.021                  |
| 2     | 7        | 0.04               | 0.003                  | 0.003                  | <0.26              | 0.000                  | 0.021                  |
| 2     | 8        | 0.04               | 0.003                  | 0.003                  | <0.26              | 0.000                  | 0.021                  |
| 3     | 1        | 0.07               | 0.006                  | 0.006                  | <0.26              | 0.000                  | 0.021                  |
| 3     | 2        | 0.05               | 0.004                  | 0.004                  | <0.26              | 0.000                  | 0.021                  |
| 3     | 3        | 0.05               | 0.004                  | 0.004                  | <0.26              | 0.000                  | 0.021                  |
| 3     | 4        | 0.04               | 0.003                  | 0.003                  | <0.26              | 0.000                  | 0.021                  |
| 3     | 5        | 0.07               | 0.006                  | 0.006                  | <0.26              | 0.000                  | 0.021                  |
| 3     | 6        | 0.08               | 0.007                  | 0.007                  | <0.26              | 0.000                  | 0.021                  |
| 3     | 7        | 0.15               | 0.012                  | 0.012                  | <0.26              | 0.000                  | 0.021                  |
| 3     | 8        | 0.08               | 0.006                  | 0.006                  | <0.26              | 0.000                  | 0.021                  |
| 4     | 1        | 0.07               | 0.006                  | 0.006                  | <0.26              | 0.000                  | 0.021                  |
| 4     | 2        | <0.04              | 0.000                  | 0.003                  | <0.26              | 0.000                  | 0.021                  |
| 4     | 3        | 0.04               | 0.003                  | 0.003                  | <0.26              | 0.000                  | 0.021                  |
| 4     | 4        | 0.04               | 0.003                  | 0.003                  | <0.26              | 0.000                  | 0.021                  |
| 4     | 5        | 0.06               | 0.004                  | 0.004                  | <0.26              | 0.000                  | 0.021                  |
| 4     | 6        | 0.06               | 0.005                  | 0.005                  | <0.26              | 0.000                  | 0.021                  |
| 4     | 7        | 0.10               | 0.008                  | 0.008                  | <0.26              | 0.000                  | 0.021                  |
| 4     | 8        | 0.04               | 0.003                  | 0.003                  | <0.26              | 0.000                  | 0.021                  |
| 5     | 1        | 0.09               | 0.007                  | 0.007                  | <0.26              | 0.000                  | 0.021                  |
| 5     | 2        | 0.05               | 0.004                  | 0.004                  | <0.26              | 0.000                  | 0.021                  |
| 5     | 3        | 0.05               | 0.004                  | 0.004                  | <0.26              | 0.000                  | 0.021                  |
| 5     | 4        | 0.04               | 0.003                  | 0.003                  | <0.26              | 0.000                  | 0.021                  |
| 5     | 5        | 0.06               | 0.005                  | 0.005                  | <0.26              | 0.000                  | 0.021                  |
| 5     | 6        | 0.05               | 0.004                  | 0.004                  | <0.26              | 0.000                  | 0.021                  |
| 5     | 7        | 0.09               | 0.007                  | 0.007                  | <0.26              | 0.000                  | 0.021                  |
| 5     | 8        | 0.04               | 0.003                  | 0.003                  | <0.26              | 0.000                  | 0.021                  |
|       |          |                    | Σ min                  | Σ max                  |                    | Σ min                  | Σ max                  |
| 1     |          |                    | 0.010                  | 0.030                  |                    | 0.000                  | 0.166                  |
| 2     |          |                    | 0.012                  | 0.028                  |                    | 0.000                  | 0.166                  |
| 3     |          |                    | 0.048                  | 0.048                  |                    | 0.000                  | 0.166                  |
| 4     |          |                    | 0.033                  | 0.036                  |                    | 0.000                  | 0.166                  |
| 5     |          |                    | 0.036                  | 0.036                  |                    | 0.000                  | 0.167                  |
| Mean  |          |                    | 0.028                  | 0.036                  |                    | 0.000                  | 0.166                  |
| SD    |          |                    | 0.016                  | 0.008                  |                    | 0.000                  | 0.000                  |

**Table G.** Continued CUS.

| Stone | Fraction | LAB 2<br>CUS2 | min                    | max                    | LAB 2<br>CUS3 | min                    | max                    |
|-------|----------|---------------|------------------------|------------------------|---------------|------------------------|------------------------|
|       |          | Se<br>µg/l    | r<br>mg/m <sup>2</sup> | r<br>mg/m <sup>2</sup> | Se<br>µg/l    | r<br>mg/m <sup>2</sup> | r<br>mg/m <sup>2</sup> |
| 1     | 1        | <0.96         | 0.000                  | 0.077                  |               |                        |                        |
| 1     | 2        | <0.96         | 0.000                  | 0.077                  |               |                        |                        |
| 1     | 3        | <0.96         | 0.000                  | 0.077                  |               |                        |                        |
| 1     | 4        | <0.96         | 0.000                  | 0.077                  |               |                        |                        |
| 1     | 5        | <0.96         | 0.000                  | 0.077                  |               |                        |                        |
| 1     | 6        | <0.96         | 0.000                  | 0.077                  |               |                        |                        |
| 1     | 7        | <0.96         | 0.000                  | 0.077                  |               |                        |                        |
| 1     | 8        | <0.96         | 0.000                  | 0.077                  |               |                        |                        |
| 2     | 1        | <0.96         | 0.000                  | 0.077                  | <0.96         | 0.000                  | 0.077                  |
| 2     | 2        | <0.96         | 0.000                  | 0.077                  | <0.96         | 0.000                  | 0.077                  |
| 2     | 3        | <0.96         | 0.000                  | 0.077                  | <0.96         | 0.000                  | 0.077                  |
| 2     | 4        | <0.96         | 0.000                  | 0.077                  | <0.96         | 0.000                  | 0.077                  |
| 2     | 5        | <0.96         | 0.000                  | 0.077                  | <0.96         | 0.000                  | 0.077                  |
| 2     | 6        | <0.96         | 0.000                  | 0.077                  | <0.96         | 0.000                  | 0.077                  |
| 2     | 7        | <0.96         | 0.000                  | 0.077                  | <0.96         | 0.000                  | 0.077                  |
| 2     | 8        | <0.96         | 0.000                  | 0.077                  | <0.96         | 0.000                  | 0.077                  |
| 3     | 1        | <0.96         | 0.000                  | 0.077                  | <0.96         | 0.000                  | 0.077                  |
| 3     | 2        | <0.96         | 0.000                  | 0.077                  | <0.96         | 0.000                  | 0.077                  |
| 3     | 3        | <0.96         | 0.000                  | 0.077                  | <0.96         | 0.000                  | 0.077                  |
| 3     | 4        | <0.96         | 0.000                  | 0.077                  | <0.96         | 0.000                  | 0.077                  |
| 3     | 5        | <0.96         | 0.000                  | 0.077                  | <0.96         | 0.000                  | 0.077                  |
| 3     | 6        | <0.96         | 0.000                  | 0.077                  | <0.96         | 0.000                  | 0.077                  |
| 3     | 7        | <0.96         | 0.000                  | 0.077                  | <0.96         | 0.000                  | 0.077                  |
| 3     | 8        | <0.96         | 0.000                  | 0.077                  | <0.96         | 0.000                  | 0.077                  |
| 4     | 1        | <0.96         | 0.000                  | 0.077                  | <0.96         | 0.000                  | 0.077                  |
| 4     | 2        | <0.96         | 0.000                  | 0.077                  | <0.96         | 0.000                  | 0.077                  |
| 4     | 3        | <0.96         | 0.000                  | 0.077                  | <0.96         | 0.000                  | 0.077                  |
| 4     | 4        | <0.96         | 0.000                  | 0.077                  | <0.96         | 0.000                  | 0.077                  |
| 4     | 5        | <0.96         | 0.000                  | 0.077                  | <0.96         | 0.000                  | 0.077                  |
| 4     | 6        | <0.96         | 0.000                  | 0.077                  | <0.96         | 0.000                  | 0.077                  |
| 4     | 7        | <0.96         | 0.000                  | 0.077                  | <0.96         | 0.000                  | 0.077                  |
| 4     | 8        | <0.96         | 0.000                  | 0.077                  | <0.96         | 0.000                  | 0.077                  |
| 5     | 1        | <0.96         | 0.000                  | 0.077                  | <0.96         | 0.000                  | 0.077                  |
| 5     | 2        | <0.96         | 0.000                  | 0.077                  | <0.96         | 0.000                  | 0.077                  |
| 5     | 3        | <0.96         | 0.000                  | 0.077                  | <0.96         | 0.000                  | 0.077                  |
| 5     | 4        | <0.96         | 0.000                  | 0.077                  | <0.96         | 0.000                  | 0.077                  |
| 5     | 5        | <0.96         | 0.000                  | 0.077                  | <0.96         | 0.000                  | 0.077                  |
| 5     | 6        | <0.96         | 0.000                  | 0.077                  | <0.96         | 0.000                  | 0.077                  |
| 5     | 7        | <0.96         | 0.000                  | 0.077                  | <0.96         | 0.000                  | 0.077                  |
| 5     | 8        | <0.96         | 0.000                  | 0.077                  | <0.96         | 0.000                  | 0.077                  |
|       |          |               | Σ min                  | Σ max                  |               | Σ min                  | Σ max                  |
| 1     |          |               | 0.000                  | 0.614                  |               |                        |                        |
| 2     |          |               | 0.000                  | 0.614                  |               | 0.000                  | 0.615                  |
| 3     |          |               | 0.000                  | 0.614                  |               | 0.000                  | 0.615                  |
| 4     |          |               | 0.000                  | 0.615                  |               | 0.000                  | 0.614                  |
| 5     |          |               | 0.000                  | 0.614                  |               | 0.000                  | 0.614                  |
| Mean  |          |               | 0.000                  | 0.614                  |               | 0.000                  | 0.615                  |
| SD    |          |               | 0.000                  | 0.000                  |               | 0.000                  | 0.001                  |

**Table G.** Continued CUS.

| Stone | Fraction | LAB 1              | min                    | max                    | LAB 2              | min                    | max                    |
|-------|----------|--------------------|------------------------|------------------------|--------------------|------------------------|------------------------|
|       |          | CUS1<br>Sn<br>µg/l | r<br>mg/m <sup>2</sup> | r<br>mg/m <sup>2</sup> | CUS1<br>Sn<br>µg/l | r<br>mg/m <sup>2</sup> | r<br>mg/m <sup>2</sup> |
| 1     | 1        | 0.10               | 0.008                  | 0.008                  | <0.38              | 0.000                  | 0.030                  |
| 1     | 2        | 0.06               | 0.005                  | 0.005                  | <0.38              | 0.000                  | 0.030                  |
| 1     | 3        | 0.06               | 0.005                  | 0.005                  | <0.38              | 0.000                  | 0.030                  |
| 1     | 4        | 0.04               | 0.003                  | 0.003                  | <0.38              | 0.000                  | 0.030                  |
| 1     | 5        | 0.05               | 0.004                  | 0.004                  | <0.38              | 0.000                  | 0.030                  |
| 1     | 6        | 0.06               | 0.005                  | 0.005                  | <0.38              | 0.000                  | 0.030                  |
| 1     | 7        | 0.15               | 0.012                  | 0.012                  | <0.38              | 0.000                  | 0.030                  |
| 1     | 8        | 0.10               | 0.008                  | 0.008                  | <0.38              | 0.000                  | 0.030                  |
| 2     | 1        | 0.10               | 0.008                  | 0.008                  | <0.38              | 0.000                  | 0.030                  |
| 2     | 2        | 0.06               | 0.005                  | 0.005                  | <0.38              | 0.000                  | 0.030                  |
| 2     | 3        | 0.07               | 0.006                  | 0.006                  | <0.38              | 0.000                  | 0.030                  |
| 2     | 4        | 0.06               | 0.005                  | 0.005                  | <0.38              | 0.000                  | 0.030                  |
| 2     | 5        | 0.05               | 0.004                  | 0.004                  | <0.38              | 0.000                  | 0.030                  |
| 2     | 6        | 0.06               | 0.005                  | 0.005                  | <0.38              | 0.000                  | 0.030                  |
| 2     | 7        | 0.18               | 0.015                  | 0.015                  | <0.38              | 0.000                  | 0.030                  |
| 2     | 8        | 0.11               | 0.009                  | 0.009                  | <0.38              | 0.000                  | 0.030                  |
| 3     | 1        | 0.31               | 0.025                  | 0.025                  | <0.38              | 0.000                  | 0.030                  |
| 3     | 2        | 0.10               | 0.008                  | 0.008                  | <0.38              | 0.000                  | 0.030                  |
| 3     | 3        | 0.06               | 0.005                  | 0.005                  | <0.38              | 0.000                  | 0.030                  |
| 3     | 4        | 0.04               | 0.004                  | 0.004                  | <0.38              | 0.000                  | 0.030                  |
| 3     | 5        | 0.06               | 0.004                  | 0.004                  | <0.38              | 0.000                  | 0.030                  |
| 3     | 6        | 0.08               | 0.006                  | 0.006                  | <0.38              | 0.000                  | 0.030                  |
| 3     | 7        | 0.11               | 0.009                  | 0.009                  | <0.38              | 0.000                  | 0.030                  |
| 3     | 8        | 0.08               | 0.006                  | 0.006                  | <0.38              | 0.000                  | 0.030                  |
| 4     | 1        | 0.31               | 0.025                  | 0.025                  | <0.38              | 0.000                  | 0.030                  |
| 4     | 2        | 0.07               | 0.006                  | 0.006                  | <0.38              | 0.000                  | 0.030                  |
| 4     | 3        | 0.06               | 0.005                  | 0.005                  | <0.38              | 0.000                  | 0.030                  |
| 4     | 4        | 0.06               | 0.005                  | 0.005                  | <0.38              | 0.000                  | 0.030                  |
| 4     | 5        | 0.05               | 0.004                  | 0.004                  | <0.38              | 0.000                  | 0.030                  |
| 4     | 6        | 0.07               | 0.005                  | 0.005                  | <0.38              | 0.000                  | 0.030                  |
| 4     | 7        | 0.12               | 0.009                  | 0.009                  | <0.38              | 0.000                  | 0.030                  |
| 4     | 8        | 0.10               | 0.008                  | 0.008                  | <0.38              | 0.000                  | 0.030                  |
| 5     | 1        | 0.19               | 0.015                  | 0.015                  | <0.38              | 0.000                  | 0.030                  |
| 5     | 2        | 0.10               | 0.008                  | 0.008                  | <0.38              | 0.000                  | 0.030                  |
| 5     | 3        | 0.12               | 0.010                  | 0.010                  | <0.38              | 0.000                  | 0.030                  |
| 5     | 4        | 0.07               | 0.006                  | 0.006                  | <0.38              | 0.000                  | 0.030                  |
| 5     | 5        | 0.08               | 0.006                  | 0.006                  | <0.38              | 0.000                  | 0.030                  |
| 5     | 6        | 0.11               | 0.008                  | 0.008                  | <0.38              | 0.000                  | 0.030                  |
| 5     | 7        | 0.22               | 0.018                  | 0.018                  | <0.38              | 0.000                  | 0.030                  |
| 5     | 8        | 0.19               | 0.015                  | 0.015                  | <0.38              | 0.000                  | 0.030                  |
|       |          |                    | Σ min                  | Σ max                  |                    |                        |                        |
| 1     |          |                    | 0.050                  | 0.050                  |                    | 0.000                  | 0.243                  |
| 2     |          |                    | 0.056                  | 0.056                  |                    | 0.000                  | 0.243                  |
| 3     |          |                    | 0.067                  | 0.067                  |                    | 0.000                  | 0.243                  |
| 4     |          |                    | 0.067                  | 0.067                  |                    | 0.000                  | 0.243                  |
| 5     |          |                    | 0.086                  | 0.086                  |                    | 0.000                  | 0.243                  |
| Mean  |          |                    | 0.065                  | 0.065                  |                    | 0.000                  | 0.243                  |
| SD    |          |                    | 0.014                  | 0.014                  |                    | 0.000                  | 0.000                  |

**Table G.** Continued CUS.

| Stone | Fraction | LAB 2<br>CUS2<br>Sn | min                    | max                    | LAB 2<br>CUS3<br>Sn | min                    | max                    |
|-------|----------|---------------------|------------------------|------------------------|---------------------|------------------------|------------------------|
|       |          | µg/l                | r<br>mg/m <sup>2</sup> | r<br>mg/m <sup>2</sup> | µg/l                | r<br>mg/m <sup>2</sup> | r<br>mg/m <sup>2</sup> |
| 1     | 1        | <0.17               | 0.000                  | 0.014                  |                     |                        |                        |
| 1     | 2        | <0.17               | 0.000                  | 0.014                  |                     |                        |                        |
| 1     | 3        | <0.17               | 0.000                  | 0.014                  |                     |                        |                        |
| 1     | 4        | 0.23                | 0.018                  | 0.018                  |                     |                        |                        |
| 1     | 5        | <0.17               | 0.000                  | 0.014                  |                     |                        |                        |
| 1     | 6        | <0.17               | 0.000                  | 0.014                  |                     |                        |                        |
| 1     | 7        | <0.17               | 0.000                  | 0.014                  |                     |                        |                        |
| 1     | 8        | <0.17               | 0.000                  | 0.014                  |                     |                        |                        |
| 2     | 1        | <0.17               | 0.000                  | 0.014                  | <0.08               | 0.000                  | 0.006                  |
| 2     | 2        | <0.17               | 0.000                  | 0.014                  | <0.08               | 0.000                  | 0.006                  |
| 2     | 3        | 0.20                | 0.016                  | 0.016                  | <0.08               | 0.000                  | 0.006                  |
| 2     | 4        | <0.17               | 0.000                  | 0.014                  | <0.08               | 0.000                  | 0.006                  |
| 2     | 5        | <0.17               | 0.000                  | 0.014                  | <0.08               | 0.000                  | 0.006                  |
| 2     | 6        | <0.17               | 0.000                  | 0.014                  | <0.08               | 0.000                  | 0.006                  |
| 2     | 7        | <0.17               | 0.000                  | 0.014                  | <0.08               | 0.000                  | 0.006                  |
| 2     | 8        | <0.17               | 0.000                  | 0.014                  | <0.08               | 0.000                  | 0.006                  |
| 3     | 1        | <0.17               | 0.000                  | 0.014                  | <0.08               | 0.000                  | 0.006                  |
| 3     | 2        | <0.17               | 0.000                  | 0.014                  | <0.08               | 0.000                  | 0.006                  |
| 3     | 3        | <0.17               | 0.000                  | 0.014                  | <0.08               | 0.000                  | 0.006                  |
| 3     | 4        | <0.17               | 0.000                  | 0.014                  | <0.08               | 0.000                  | 0.006                  |
| 3     | 5        | <0.17               | 0.000                  | 0.014                  | <0.08               | 0.000                  | 0.006                  |
| 3     | 6        | <0.17               | 0.000                  | 0.014                  | <0.08               | 0.000                  | 0.006                  |
| 3     | 7        | <0.17               | 0.000                  | 0.014                  | <0.08               | 0.000                  | 0.006                  |
| 3     | 8        | <0.17               | 0.000                  | 0.014                  | <0.08               | 0.000                  | 0.006                  |
| 4     | 1        | <0.17               | 0.000                  | 0.014                  | <0.08               | 0.000                  | 0.006                  |
| 4     | 2        | <0.17               | 0.000                  | 0.014                  | <0.08               | 0.000                  | 0.006                  |
| 4     | 3        | <0.17               | 0.000                  | 0.014                  | <0.08               | 0.000                  | 0.006                  |
| 4     | 4        | <0.17               | 0.000                  | 0.014                  | <0.08               | 0.000                  | 0.006                  |
| 4     | 5        | <0.17               | 0.000                  | 0.014                  | <0.08               | 0.000                  | 0.006                  |
| 4     | 6        | <0.17               | 0.000                  | 0.014                  | <0.08               | 0.000                  | 0.006                  |
| 4     | 7        | <0.17               | 0.000                  | 0.014                  | <0.08               | 0.000                  | 0.006                  |
| 4     | 8        | <0.17               | 0.000                  | 0.014                  | <0.08               | 0.000                  | 0.006                  |
| 5     | 1        | <0.17               | 0.000                  | 0.014                  | <0.08               | 0.000                  | 0.006                  |
| 5     | 2        | <0.17               | 0.000                  | 0.014                  | <0.08               | 0.000                  | 0.006                  |
| 5     | 3        | 0.20                | 0.016                  | 0.016                  | <0.08               | 0.000                  | 0.006                  |
| 5     | 4        | <0.17               | 0.000                  | 0.014                  | <0.08               | 0.000                  | 0.006                  |
| 5     | 5        | <0.17               | 0.000                  | 0.014                  | <0.08               | 0.000                  | 0.006                  |
| 5     | 6        | <0.17               | 0.000                  | 0.014                  | <0.08               | 0.000                  | 0.006                  |
| 5     | 7        | <0.17               | 0.000                  | 0.014                  | <0.08               | 0.000                  | 0.006                  |
| 5     | 8        | <0.17               | 0.000                  | 0.014                  | <0.08               | 0.000                  | 0.006                  |
|       |          |                     | Σ min                  | Σ max                  |                     | Σ min                  | Σ max                  |
| 1     |          |                     | 0.018                  | 0.113                  |                     |                        |                        |
| 2     |          |                     | 0.016                  | 0.112                  |                     | 0.000                  | 0.051                  |
| 3     |          |                     | 0.000                  | 0.109                  |                     | 0.000                  | 0.051                  |
| 4     |          |                     | 0.000                  | 0.109                  |                     | 0.000                  | 0.051                  |
| 5     |          |                     | 0.016                  | 0.111                  |                     | 0.000                  | 0.051                  |
| Mean  |          |                     | 0.010                  | 0.111                  |                     | 0.000                  | 0.051                  |
| SD    |          |                     | 0.009                  | 0.002                  |                     | 0.000                  | 0.000                  |

**Table G.** Continued CUS.

| Stone | Fraction | LAB 1<br>CUS1 | min                    | max                    | LAB 2<br>CUS1 | min                    | max                    |
|-------|----------|---------------|------------------------|------------------------|---------------|------------------------|------------------------|
|       |          | Sr<br>µg/l    | r<br>mg/m <sup>2</sup> | r<br>mg/m <sup>2</sup> | Sr<br>µg/l    | r<br>mg/m <sup>2</sup> | r<br>mg/m <sup>2</sup> |
| 1     | 1        | 5.07          | 0.41                   | 0.41                   | 2.73          | 0.22                   | 0.22                   |
| 1     | 2        | 8.38          | 0.67                   | 0.67                   | 1.95          | 0.16                   | 0.16                   |
| 1     | 3        | 6.21          | 0.50                   | 0.50                   | 1.44          | 0.11                   | 0.11                   |
| 1     | 4        | 2.20          | 0.18                   | 0.18                   | 1.12          | 0.09                   | 0.09                   |
| 1     | 5        | 6.95          | 0.56                   | 0.56                   | 1.50          | 0.12                   | 0.12                   |
| 1     | 6        | 7.23          | 0.58                   | 0.58                   | 1.34          | 0.11                   | 0.11                   |
| 1     | 7        | 7.01          | 0.56                   | 0.56                   | 1.94          | 0.16                   | 0.16                   |
| 1     | 8        | 7.09          | 0.57                   | 0.57                   | 2.12          | 0.17                   | 0.17                   |
| 2     | 1        | 8.90          | 0.71                   | 0.71                   | 2.78          | 0.22                   | 0.22                   |
| 2     | 2        | 8.23          | 0.66                   | 0.66                   | 2.99          | 0.24                   | 0.24                   |
| 2     | 3        | 5.34          | 0.43                   | 0.43                   | 2.40          | 0.19                   | 0.19                   |
| 2     | 4        | 7.01          | 0.56                   | 0.56                   | 1.48          | 0.12                   | 0.12                   |
| 2     | 5        | 4.69          | 0.38                   | 0.38                   | 1.72          | 0.14                   | 0.14                   |
| 2     | 6        | 7.20          | 0.58                   | 0.58                   | 1.22          | 0.10                   | 0.10                   |
| 2     | 7        | 9.98          | 0.80                   | 0.80                   | 1.84          | 0.15                   | 0.15                   |
| 2     | 8        | 6.87          | 0.55                   | 0.55                   | 1.67          | 0.13                   | 0.13                   |
| 3     | 1        | 8.26          | 0.66                   | 0.66                   | 2.17          | 0.17                   | 0.17                   |
| 3     | 2        | 7.89          | 0.63                   | 0.63                   | 1.78          | 0.14                   | 0.14                   |
| 3     | 3        | 7.86          | 0.63                   | 0.63                   | 1.23          | 0.10                   | 0.10                   |
| 3     | 4        | 4.12          | 0.33                   | 0.33                   | 0.72          | 0.06                   | 0.06                   |
| 3     | 5        | 3.86          | 0.31                   | 0.31                   | 0.85          | 0.07                   | 0.07                   |
| 3     | 6        | 8.23          | 0.66                   | 0.66                   | 0.67          | 0.05                   | 0.05                   |
| 3     | 7        | 8.62          | 0.69                   | 0.69                   | 0.96          | 0.08                   | 0.08                   |
| 3     | 8        | 7.03          | 0.56                   | 0.56                   | 1.31          | 0.10                   | 0.10                   |
| 4     | 1        | 7.72          | 0.62                   | 0.62                   | 2.78          | 0.22                   | 0.22                   |
| 4     | 2        | 8.02          | 0.64                   | 0.64                   | 2.75          | 0.22                   | 0.22                   |
| 4     | 3        | 5.57          | 0.45                   | 0.45                   | 2.64          | 0.21                   | 0.21                   |
| 4     | 4        | 6.62          | 0.53                   | 0.53                   | 1.74          | 0.14                   | 0.14                   |
| 4     | 5        | 2.55          | 0.20                   | 0.20                   | 1.58          | 0.13                   | 0.13                   |
| 4     | 6        | 7.23          | 0.58                   | 0.58                   | 1.16          | 0.09                   | 0.09                   |
| 4     | 7        | 7.81          | 0.62                   | 0.62                   | 1.75          | 0.14                   | 0.14                   |
| 4     | 8        | 7.75          | 0.62                   | 0.62                   | 2.39          | 0.19                   | 0.19                   |
| 5     | 1        | 8.40          | 0.67                   | 0.67                   | 2.46          | 0.20                   | 0.20                   |
| 5     | 2        | 3.35          | 0.27                   | 0.27                   | 1.82          | 0.15                   | 0.15                   |
| 5     | 3        | 6.81          | 0.54                   | 0.54                   | 1.23          | 0.10                   | 0.10                   |
| 5     | 4        | 3.95          | 0.32                   | 0.32                   | 0.80          | 0.06                   | 0.06                   |
| 5     | 5        | 7.59          | 0.61                   | 0.61                   | 0.91          | 0.07                   | 0.07                   |
| 5     | 6        | 7.84          | 0.63                   | 0.63                   | 0.73          | 0.06                   | 0.06                   |
| 5     | 7        | 8.06          | 0.64                   | 0.64                   | 1.21          | 0.10                   | 0.10                   |
| 5     | 8        | 7.25          | 0.58                   | 0.58                   | 1.56          | 0.12                   | 0.12                   |
|       |          |               | Σ min                  | Σ max                  |               | Σ min                  | Σ max                  |
| 1     |          |               | 4.01                   | 4.01                   |               | 1.13                   | 1.13                   |
| 2     |          |               | 4.66                   | 4.66                   |               | 1.29                   | 1.29                   |
| 3     |          |               | 4.47                   | 4.47                   |               | 0.77                   | 0.77                   |
| 4     |          |               | 4.26                   | 4.26                   |               | 1.34                   | 1.34                   |
| 5     |          |               | 4.26                   | 4.26                   |               | 0.86                   | 0.86                   |
| Mean  |          |               | 4.33                   | 4.33                   |               | 1.08                   | 1.08                   |
| SD    |          |               | 0.24                   | 0.24                   |               | 0.25                   | 0.25                   |

**Table G.** Continued CUS.

| Stone | Fraction | LAB 2<br>CUS2 | min                    | max                    | LAB 2<br>CUS3 | min                    | max                    |
|-------|----------|---------------|------------------------|------------------------|---------------|------------------------|------------------------|
|       |          | Sr<br>µg/l    | r<br>mg/m <sup>2</sup> | r<br>mg/m <sup>2</sup> | Sr<br>µg/l    | r<br>mg/m <sup>2</sup> | r<br>mg/m <sup>2</sup> |
| 1     | 1        | 0.72          | 0.058                  | 0.058                  |               |                        |                        |
| 1     | 2        | <0.50         | 0.000                  | 0.040                  |               |                        |                        |
| 1     | 3        | <0.50         | 0.000                  | 0.040                  |               |                        |                        |
| 1     | 4        | <0.50         | 0.000                  | 0.040                  |               |                        |                        |
| 1     | 5        | <0.50         | 0.000                  | 0.040                  |               |                        |                        |
| 1     | 6        | <0.50         | 0.000                  | 0.040                  |               |                        |                        |
| 1     | 7        | <0.50         | 0.000                  | 0.040                  |               |                        |                        |
| 1     | 8        | <0.50         | 0.000                  | 0.040                  |               |                        |                        |
| 2     | 1        | <0.50         | 0.000                  | 0.040                  | <0.50         | 0.000                  | 0.040                  |
| 2     | 2        | <0.50         | 0.000                  | 0.040                  | <0.50         | 0.000                  | 0.040                  |
| 2     | 3        | <0.50         | 0.000                  | 0.040                  | <0.50         | 0.000                  | 0.040                  |
| 2     | 4        | <0.50         | 0.000                  | 0.040                  | <0.50         | 0.000                  | 0.040                  |
| 2     | 5        | <0.50         | 0.000                  | 0.040                  | <0.50         | 0.000                  | 0.040                  |
| 2     | 6        | <0.50         | 0.000                  | 0.040                  | <0.50         | 0.000                  | 0.040                  |
| 2     | 7        | <0.50         | 0.000                  | 0.040                  | <0.50         | 0.040                  | 0.040                  |
| 2     | 8        | 0.74          | 0.059                  | 0.059                  | <0.50         | 0.040                  | 0.040                  |
| 3     | 1        | 1.08          | 0.087                  | 0.087                  | <0.50         | 0.000                  | 0.040                  |
| 3     | 2        | 0.55          | 0.044                  | 0.044                  | <0.50         | 0.000                  | 0.040                  |
| 3     | 3        | 0.51          | 0.040                  | 0.040                  | <0.50         | 0.000                  | 0.040                  |
| 3     | 4        | <0.50         | 0.000                  | 0.040                  | <0.50         | 0.000                  | 0.040                  |
| 3     | 5        | 0.61          | 0.049                  | 0.049                  | 1.07          | 0.085                  | 0.085                  |
| 3     | 6        | <0.50         | 0.000                  | 0.040                  | 0.64          | 0.051                  | 0.051                  |
| 3     | 7        | 0.52          | 0.041                  | 0.041                  | 1.00          | 0.080                  | 0.080                  |
| 3     | 8        | 0.74          | 0.059                  | 0.059                  | 0.85          | 0.068                  | 0.068                  |
| 4     | 1        | 0.95          | 0.076                  | 0.076                  | <0.50         | 0.000                  | 0.040                  |
| 4     | 2        | <0.50         | 0.000                  | 0.040                  | <0.50         | 0.000                  | 0.040                  |
| 4     | 3        | <0.50         | 0.000                  | 0.040                  | <0.50         | 0.000                  | 0.040                  |
| 4     | 4        | <0.50         | 0.000                  | 0.040                  | <0.50         | 0.000                  | 0.040                  |
| 4     | 5        | <0.50         | 0.000                  | 0.040                  | <0.50         | 0.040                  | 0.040                  |
| 4     | 6        | <0.50         | 0.000                  | 0.040                  | <0.50         | 0.040                  | 0.040                  |
| 4     | 7        | <0.50         | 0.000                  | 0.040                  | 0.71          | 0.057                  | 0.057                  |
| 4     | 8        | 0.81          | 0.065                  | 0.065                  | 0.71          | 0.057                  | 0.057                  |
| 5     | 1        | 1.06          | 0.085                  | 0.085                  | 0.57          | 0.046                  | 0.046                  |
| 5     | 2        | 0.50          | 0.040                  | 0.040                  | 0.71          | 0.057                  | 0.057                  |
| 5     | 3        | <0.50         | 0.000                  | 0.040                  | <0.50         | 0.000                  | 0.040                  |
| 5     | 4        | <0.50         | 0.000                  | 0.040                  | <0.50         | 0.000                  | 0.040                  |
| 5     | 5        | 0.73          | 0.058                  | 0.058                  | <0.50         | 0.000                  | 0.040                  |
| 5     | 6        | <0.50         | 0.000                  | 0.040                  | 0.64          | 0.051                  | 0.051                  |
| 5     | 7        | <0.50         | 0.000                  | 0.040                  | 0.78          | 0.063                  | 0.063                  |
| 5     | 8        | 0.74          | 0.059                  | 0.059                  | 0.64          | 0.051                  | 0.051                  |
|       |          |               | Σ min                  | Σ max                  |               | Σ min                  | Σ max                  |
| 1     |          |               | 0.058                  | 0.338                  |               |                        |                        |
| 2     |          |               | 0.059                  | 0.339                  |               | 0.080                  | 0.320                  |
| 3     |          |               | 0.320                  | 0.400                  |               | 0.285                  | 0.445                  |
| 4     |          |               | 0.141                  | 0.381                  |               | 0.194                  | 0.354                  |
| 5     |          |               | 0.241                  | 0.401                  |               | 0.267                  | 0.387                  |
| Mean  |          |               | 0.164                  | 0.372                  |               | 0.206                  | 0.377                  |
| SD    |          |               | 0.115                  | 0.032                  |               | 0.093                  | 0.053                  |

**Table G.** Continued CUS.

| Stone | Fraction | LAB 1             | min                    | max                    | LAB 2             | min                    | max                    |
|-------|----------|-------------------|------------------------|------------------------|-------------------|------------------------|------------------------|
|       |          | CUS1<br>U<br>µg/l | r<br>mg/m <sup>2</sup> | r<br>mg/m <sup>2</sup> | CUS1<br>U<br>µg/l | r<br>mg/m <sup>2</sup> | r<br>mg/m <sup>2</sup> |
| 1     | 1        | <0.04             | 0.0                    | 0.003                  | <0.01             | 0.000                  | 0.001                  |
| 1     | 2        | <0.04             | 0.0                    | 0.003                  | <0.01             | 0.000                  | 0.001                  |
| 1     | 3        | <0.04             | 0.0                    | 0.003                  | <0.01             | 0.000                  | 0.001                  |
| 1     | 4        | <0.04             | 0.0                    | 0.003                  | <0.01             | 0.000                  | 0.001                  |
| 1     | 5        | <0.04             | 0.0                    | 0.003                  | <0.01             | 0.000                  | 0.001                  |
| 1     | 6        | <0.04             | 0.0                    | 0.003                  | <0.01             | 0.000                  | 0.001                  |
| 1     | 7        | <0.04             | 0.0                    | 0.003                  | <0.01             | 0.000                  | 0.001                  |
| 1     | 8        | <0.04             | 0.0                    | 0.003                  | <0.01             | 0.000                  | 0.001                  |
| 2     | 1        | <0.04             | 0.0                    | 0.003                  | <0.01             | 0.000                  | 0.001                  |
| 2     | 2        | <0.04             | 0.0                    | 0.003                  | <0.01             | 0.000                  | 0.001                  |
| 2     | 3        | <0.04             | 0.0                    | 0.003                  | <0.01             | 0.000                  | 0.001                  |
| 2     | 4        | <0.04             | 0.0                    | 0.003                  | <0.01             | 0.000                  | 0.001                  |
| 2     | 5        | <0.04             | 0.0                    | 0.003                  | <0.01             | 0.000                  | 0.001                  |
| 2     | 6        | <0.04             | 0.0                    | 0.003                  | <0.01             | 0.000                  | 0.001                  |
| 2     | 7        | <0.04             | 0.0                    | 0.003                  | <0.01             | 0.000                  | 0.001                  |
| 2     | 8        | <0.04             | 0.0                    | 0.003                  | <0.01             | 0.000                  | 0.001                  |
| 3     | 1        | <0.04             | 0.0                    | 0.003                  | <0.01             | 0.000                  | 0.001                  |
| 3     | 2        | <0.04             | 0.0                    | 0.003                  | <0.01             | 0.000                  | 0.001                  |
| 3     | 3        | <0.04             | 0.0                    | 0.003                  | <0.01             | 0.000                  | 0.001                  |
| 3     | 4        | <0.04             | 0.0                    | 0.003                  | <0.01             | 0.000                  | 0.001                  |
| 3     | 5        | <0.04             | 0.0                    | 0.003                  | <0.01             | 0.000                  | 0.001                  |
| 3     | 6        | <0.04             | 0.0                    | 0.003                  | <0.01             | 0.000                  | 0.001                  |
| 3     | 7        | <0.04             | 0.0                    | 0.003                  | <0.01             | 0.000                  | 0.001                  |
| 3     | 8        | <0.04             | 0.0                    | 0.003                  | <0.01             | 0.000                  | 0.001                  |
| 4     | 1        | <0.04             | 0.0                    | 0.003                  | <0.01             | 0.000                  | 0.001                  |
| 4     | 2        | <0.04             | 0.0                    | 0.003                  | <0.01             | 0.000                  | 0.001                  |
| 4     | 3        | <0.04             | 0.0                    | 0.003                  | <0.01             | 0.000                  | 0.001                  |
| 4     | 4        | <0.04             | 0.0                    | 0.003                  | <0.01             | 0.000                  | 0.001                  |
| 4     | 5        | <0.04             | 0.0                    | 0.003                  | <0.01             | 0.000                  | 0.001                  |
| 4     | 6        | <0.04             | 0.0                    | 0.003                  | <0.01             | 0.000                  | 0.001                  |
| 4     | 7        | <0.04             | 0.0                    | 0.003                  | <0.01             | 0.000                  | 0.001                  |
| 4     | 8        | <0.04             | 0.0                    | 0.003                  | <0.01             | 0.000                  | 0.001                  |
| 5     | 1        | <0.04             | 0.0                    | 0.003                  | <0.01             | 0.000                  | 0.001                  |
| 5     | 2        | <0.04             | 0.0                    | 0.003                  | <0.01             | 0.000                  | 0.001                  |
| 5     | 3        | <0.04             | 0.0                    | 0.003                  | <0.01             | 0.000                  | 0.001                  |
| 5     | 4        | <0.04             | 0.0                    | 0.003                  | <0.01             | 0.000                  | 0.001                  |
| 5     | 5        | <0.04             | 0.0                    | 0.003                  | <0.01             | 0.000                  | 0.001                  |
| 5     | 6        | <0.04             | 0.0                    | 0.003                  | <0.01             | 0.000                  | 0.001                  |
| 5     | 7        | <0.04             | 0.0                    | 0.003                  | <0.01             | 0.000                  | 0.001                  |
| 5     | 8        | <0.04             | 0.0                    | 0.003                  | <0.01             | 0.000                  | 0.001                  |
|       |          |                   | Σ min                  | Σ max                  |                   | Σ min                  | Σ max                  |
| 1     |          |                   | 0.000                  | 0.026                  |                   | 0.000                  | 0.006                  |
| 2     |          |                   | 0.000                  | 0.026                  |                   | 0.000                  | 0.006                  |
| 3     |          |                   | 0.000                  | 0.026                  |                   | 0.000                  | 0.006                  |
| 4     |          |                   | 0.000                  | 0.026                  |                   | 0.000                  | 0.006                  |
| 5     |          |                   | 0.000                  | 0.026                  |                   | 0.000                  | 0.006                  |
| Mean  |          |                   | 0.000                  | 0.026                  |                   | 0.000                  | 0.006                  |
| SD    |          |                   | 0.000                  | 0.000                  |                   | 0.000                  | 0.000                  |

**Table G.** Continued CUS.

| Stone | Fraction | LAB 2<br>CUS2 | min                    | max                    | LAB 2<br>CUS3 | min                    | max                    |
|-------|----------|---------------|------------------------|------------------------|---------------|------------------------|------------------------|
|       |          | U<br>µg/l     | r<br>mg/m <sup>2</sup> | r<br>mg/m <sup>2</sup> | U<br>µg/l     | r<br>mg/m <sup>2</sup> | r<br>mg/m <sup>2</sup> |
| 1     | 1        | <0.08         | 0.000                  | 0.006                  |               |                        |                        |
| 1     | 2        | <0.08         | 0.000                  | 0.006                  |               |                        |                        |
| 1     | 3        | <0.08         | 0.000                  | 0.006                  |               |                        |                        |
| 1     | 4        | <0.08         | 0.000                  | 0.006                  |               |                        |                        |
| 1     | 5        | <0.08         | 0.000                  | 0.006                  |               |                        |                        |
| 1     | 6        | <0.08         | 0.000                  | 0.006                  |               |                        |                        |
| 1     | 7        | <0.08         | 0.000                  | 0.006                  |               |                        |                        |
| 1     | 8        | <0.08         | 0.000                  | 0.006                  |               |                        |                        |
| 2     | 1        | <0.08         | 0.000                  | 0.006                  | <0.02         | 0.000                  | 0.002                  |
| 2     | 2        | <0.08         | 0.000                  | 0.006                  | <0.02         | 0.000                  | 0.002                  |
| 2     | 3        | <0.08         | 0.000                  | 0.006                  | <0.02         | 0.000                  | 0.002                  |
| 2     | 4        | <0.08         | 0.000                  | 0.006                  | <0.02         | 0.000                  | 0.002                  |
| 2     | 5        | <0.08         | 0.000                  | 0.006                  | <0.02         | 0.000                  | 0.002                  |
| 2     | 6        | <0.08         | 0.000                  | 0.006                  | <0.02         | 0.000                  | 0.002                  |
| 2     | 7        | <0.08         | 0.000                  | 0.006                  | <0.02         | 0.000                  | 0.002                  |
| 2     | 8        | <0.08         | 0.000                  | 0.006                  | <0.02         | 0.000                  | 0.002                  |
| 3     | 1        | <0.08         | 0.000                  | 0.006                  | <0.02         | 0.000                  | 0.002                  |
| 3     | 2        | <0.08         | 0.000                  | 0.006                  | <0.02         | 0.000                  | 0.002                  |
| 3     | 3        | <0.08         | 0.000                  | 0.006                  | <0.02         | 0.000                  | 0.002                  |
| 3     | 4        | <0.08         | 0.000                  | 0.006                  | <0.02         | 0.000                  | 0.002                  |
| 3     | 5        | <0.08         | 0.000                  | 0.006                  | <0.02         | 0.000                  | 0.002                  |
| 3     | 6        | <0.08         | 0.000                  | 0.006                  | <0.02         | 0.000                  | 0.002                  |
| 3     | 7        | <0.08         | 0.000                  | 0.006                  | <0.02         | 0.000                  | 0.002                  |
| 3     | 8        | <0.08         | 0.000                  | 0.006                  | <0.02         | 0.000                  | 0.002                  |
| 4     | 1        | <0.08         | 0.000                  | 0.006                  | <0.02         | 0.000                  | 0.002                  |
| 4     | 2        | <0.08         | 0.000                  | 0.006                  | <0.02         | 0.000                  | 0.002                  |
| 4     | 3        | <0.08         | 0.000                  | 0.006                  | <0.02         | 0.000                  | 0.002                  |
| 4     | 4        | <0.08         | 0.000                  | 0.006                  | <0.02         | 0.000                  | 0.002                  |
| 4     | 5        | <0.08         | 0.000                  | 0.006                  | <0.02         | 0.000                  | 0.002                  |
| 4     | 6        | <0.08         | 0.000                  | 0.006                  | <0.02         | 0.000                  | 0.002                  |
| 4     | 7        | <0.08         | 0.000                  | 0.006                  | <0.02         | 0.000                  | 0.002                  |
| 4     | 8        | <0.08         | 0.000                  | 0.006                  | <0.02         | 0.000                  | 0.002                  |
| 5     | 1        | <0.08         | 0.000                  | 0.006                  | <0.02         | 0.000                  | 0.002                  |
| 5     | 2        | <0.08         | 0.000                  | 0.006                  | <0.02         | 0.000                  | 0.002                  |
| 5     | 3        | <0.08         | 0.000                  | 0.006                  | <0.02         | 0.000                  | 0.002                  |
| 5     | 4        | <0.08         | 0.000                  | 0.006                  | <0.02         | 0.000                  | 0.002                  |
| 5     | 5        | <0.08         | 0.000                  | 0.006                  | <0.02         | 0.000                  | 0.002                  |
| 5     | 6        | <0.08         | 0.000                  | 0.006                  | <0.02         | 0.000                  | 0.002                  |
| 5     | 7        | <0.08         | 0.000                  | 0.006                  | <0.02         | 0.000                  | 0.002                  |
| 5     | 8        | <0.08         | 0.000                  | 0.006                  | <0.02         | 0.000                  | 0.002                  |
|       |          |               | Σ min                  | Σ max                  |               | Σ min                  | Σ max                  |
| 1     |          |               | 0.000                  | 0.051                  |               |                        |                        |
| 2     |          |               | 0.000                  | 0.051                  |               | 0.000                  | 0.013                  |
| 3     |          |               | 0.000                  | 0.051                  |               | 0.000                  | 0.013                  |
| 4     |          |               | 0.000                  | 0.051                  |               | 0.000                  | 0.013                  |
| 5     |          |               | 0.000                  | 0.051                  |               | 0.000                  | 0.013                  |
| Mean  |          |               | 0.000                  | 0.051                  |               | 0.000                  | 0.013                  |
| SD    |          |               | 0.000                  | 0.000                  |               | 0.000                  | 0.000                  |

**Table G.** Continued CUS.

| Stone | Fraction | LAB 1             | min                    | max                    | LAB 2             | min                    | max                    |
|-------|----------|-------------------|------------------------|------------------------|-------------------|------------------------|------------------------|
|       |          | CUS1<br>V<br>µg/l | r<br>mg/m <sup>2</sup> | r<br>mg/m <sup>2</sup> | CUS1<br>V<br>µg/l | r<br>mg/m <sup>2</sup> | r<br>mg/m <sup>2</sup> |
| 1     | 1        | 0.03              | 0.003                  | 0.003                  | <0.02             | 0.000                  | 0.002                  |
| 1     | 2        | 0.02              | 0.002                  | 0.002                  | <0.02             | 0.000                  | 0.002                  |
| 1     | 3        | 0.02              | 0.002                  | 0.002                  | <0.02             | 0.000                  | 0.002                  |
| 1     | 4        | <0.02             | 0.000                  | 0.002                  | <0.02             | 0.000                  | 0.002                  |
| 1     | 5        | 0.02              | 0.002                  | 0.002                  | <0.02             | 0.000                  | 0.002                  |
| 1     | 6        | 0.05              | 0.004                  | 0.004                  | <0.02             | 0.000                  | 0.002                  |
| 1     | 7        | 0.04              | 0.003                  | 0.003                  | <0.02             | 0.000                  | 0.002                  |
| 1     | 8        | <0.02             | 0.000                  | 0.002                  | <0.02             | 0.000                  | 0.002                  |
| 2     | 1        | 0.04              | 0.003                  | 0.003                  | <0.02             | 0.000                  | 0.002                  |
| 2     | 2        | 0.03              | 0.002                  | 0.002                  | <0.02             | 0.000                  | 0.002                  |
| 2     | 3        | <0.02             | 0.000                  | 0.002                  | <0.02             | 0.000                  | 0.002                  |
| 2     | 4        | <0.02             | 0.000                  | 0.002                  | <0.02             | 0.000                  | 0.002                  |
| 2     | 5        | <0.02             | 0.000                  | 0.002                  | <0.02             | 0.002                  | 0.002                  |
| 2     | 6        | <0.02             | 0.000                  | 0.002                  | <0.02             | 0.000                  | 0.002                  |
| 2     | 7        | 0.04              | 0.004                  | 0.004                  | <0.02             | 0.000                  | 0.002                  |
| 2     | 8        | <0.02             | 0.000                  | 0.002                  | <0.02             | 0.000                  | 0.002                  |
| 3     | 1        | 0.03              | 0.002                  | 0.002                  | <0.02             | 0.000                  | 0.002                  |
| 3     | 2        | <0.02             | 0.000                  | 0.002                  | <0.02             | 0.000                  | 0.002                  |
| 3     | 3        | <0.02             | 0.000                  | 0.002                  | <0.02             | 0.000                  | 0.002                  |
| 3     | 4        | <0.02             | 0.000                  | 0.002                  | <0.02             | 0.000                  | 0.002                  |
| 3     | 5        | <0.02             | 0.000                  | 0.002                  | <0.02             | 0.000                  | 0.002                  |
| 3     | 6        | 0.02              | 0.002                  | 0.002                  | <0.02             | 0.000                  | 0.002                  |
| 3     | 7        | 0.04              | 0.003                  | 0.003                  | <0.02             | 0.000                  | 0.002                  |
| 3     | 8        | <0.02             | 0.000                  | 0.002                  | <0.02             | 0.000                  | 0.002                  |
| 4     | 1        | 0.04              | 0.003                  | 0.003                  | <0.02             | 0.000                  | 0.002                  |
| 4     | 2        | 0.02              | 0.002                  | 0.002                  | <0.02             | 0.000                  | 0.002                  |
| 4     | 3        | 0.03              | 0.002                  | 0.002                  | <0.02             | 0.000                  | 0.002                  |
| 4     | 4        | <0.02             | 0.000                  | 0.002                  | <0.02             | 0.000                  | 0.002                  |
| 4     | 5        | 0.02              | 0.002                  | 0.002                  | <0.02             | 0.000                  | 0.002                  |
| 4     | 6        | 0.02              | 0.002                  | 0.002                  | <0.02             | 0.000                  | 0.002                  |
| 4     | 7        | 0.04              | 0.003                  | 0.003                  | <0.02             | 0.000                  | 0.002                  |
| 4     | 8        | <0.02             | 0.000                  | 0.002                  | <0.02             | 0.000                  | 0.002                  |
| 5     | 1        | 0.07              | 0.006                  | 0.006                  | <0.02             | 0.002                  | 0.002                  |
| 5     | 2        | 0.03              | 0.002                  | 0.002                  | <0.02             | 0.000                  | 0.002                  |
| 5     | 3        | 0.03              | 0.002                  | 0.002                  | <0.02             | 0.000                  | 0.002                  |
| 5     | 4        | 0.02              | 0.002                  | 0.002                  | <0.02             | 0.000                  | 0.002                  |
| 5     | 5        | 0.03              | 0.002                  | 0.002                  | <0.02             | 0.000                  | 0.002                  |
| 5     | 6        | 0.03              | 0.002                  | 0.002                  | <0.02             | 0.000                  | 0.002                  |
| 5     | 7        | 0.05              | 0.004                  | 0.004                  | <0.02             | 0.000                  | 0.002                  |
| 5     | 8        | 0.02              | 0.002                  | 0.002                  | <0.02             | 0.000                  | 0.002                  |
|       |          |                   | Σ min                  | Σ max                  |                   | Σ min                  | Σ max                  |
| 1     |          |                   | 0.016                  | 0.019                  |                   | 0.000                  | 0.013                  |
| 2     |          |                   | 0.009                  | 0.017                  |                   | 0.002                  | 0.013                  |
| 3     |          |                   | 0.007                  | 0.015                  |                   | 0.000                  | 0.013                  |
| 4     |          |                   | 0.015                  | 0.018                  |                   | 0.000                  | 0.013                  |
| 5     |          |                   | 0.021                  | 0.021                  |                   | 0.002                  | 0.013                  |
| Mean  |          |                   | 0.014                  | 0.018                  |                   | 0.001                  | 0.013                  |
| SD    |          |                   | 0.006                  | 0.002                  |                   | 0.001                  | 0.000                  |

**Table G.** Continued CUS.

| Stone | Fraction | LAB 2<br>CUS2 | min                    | max                    | LAB 2<br>CUS3 | min                    | max                    |
|-------|----------|---------------|------------------------|------------------------|---------------|------------------------|------------------------|
|       |          | V<br>µg/l     | r<br>mg/m <sup>2</sup> | r<br>mg/m <sup>2</sup> | V<br>µg/l     | r<br>mg/m <sup>2</sup> | r<br>mg/m <sup>2</sup> |
| 1     | 1        | <0.20         | 0.000                  | 0.016                  |               |                        |                        |
| 1     | 2        | <0.20         | 0.000                  | 0.016                  |               |                        |                        |
| 1     | 3        | <0.20         | 0.000                  | 0.016                  |               |                        |                        |
| 1     | 4        | <0.20         | 0.000                  | 0.016                  |               |                        |                        |
| 1     | 5        | <0.20         | 0.000                  | 0.016                  |               |                        |                        |
| 1     | 6        | <0.20         | 0.000                  | 0.016                  |               |                        |                        |
| 1     | 7        | <0.20         | 0.000                  | 0.016                  |               |                        |                        |
| 1     | 8        | <0.20         | 0.000                  | 0.016                  |               |                        |                        |
| 2     | 1        | <0.20         | 0.000                  | 0.016                  | <0.06         | 0.000                  | 0.005                  |
| 2     | 2        | <0.20         | 0.000                  | 0.016                  | <0.06         | 0.000                  | 0.005                  |
| 2     | 3        | <0.20         | 0.000                  | 0.016                  | <0.06         | 0.000                  | 0.005                  |
| 2     | 4        | <0.20         | 0.000                  | 0.016                  | <0.06         | 0.000                  | 0.005                  |
| 2     | 5        | <0.20         | 0.000                  | 0.016                  | <0.06         | 0.000                  | 0.005                  |
| 2     | 6        | <0.20         | 0.000                  | 0.016                  | <0.06         | 0.000                  | 0.005                  |
| 2     | 7        | <0.20         | 0.000                  | 0.016                  | <0.06         | 0.000                  | 0.005                  |
| 2     | 8        | <0.20         | 0.000                  | 0.016                  | <0.06         | 0.000                  | 0.005                  |
| 3     | 1        | <0.20         | 0.000                  | 0.016                  | <0.06         | 0.000                  | 0.005                  |
| 3     | 2        | <0.20         | 0.000                  | 0.016                  | <0.06         | 0.000                  | 0.005                  |
| 3     | 3        | <0.20         | 0.000                  | 0.016                  | <0.06         | 0.000                  | 0.005                  |
| 3     | 4        | <0.20         | 0.000                  | 0.016                  | <0.06         | 0.000                  | 0.005                  |
| 3     | 5        | <0.20         | 0.000                  | 0.016                  | 0.07          | 0.006                  | 0.006                  |
| 3     | 6        | <0.20         | 0.000                  | 0.016                  | 0.07          | 0.005                  | 0.005                  |
| 3     | 7        | <0.20         | 0.000                  | 0.016                  | <0.06         | 0.000                  | 0.005                  |
| 3     | 8        | <0.20         | 0.000                  | 0.016                  | <0.06         | 0.000                  | 0.005                  |
| 4     | 1        | <0.20         | 0.000                  | 0.016                  | <0.06         | 0.000                  | 0.005                  |
| 4     | 2        | <0.20         | 0.000                  | 0.016                  | <0.06         | 0.000                  | 0.005                  |
| 4     | 3        | <0.20         | 0.000                  | 0.016                  | <0.06         | 0.000                  | 0.005                  |
| 4     | 4        | <0.20         | 0.000                  | 0.016                  | <0.06         | 0.000                  | 0.005                  |
| 4     | 5        | <0.20         | 0.000                  | 0.016                  | <0.06         | 0.000                  | 0.005                  |
| 4     | 6        | <0.20         | 0.000                  | 0.016                  | <0.06         | 0.000                  | 0.005                  |
| 4     | 7        | <0.20         | 0.000                  | 0.016                  | <0.06         | 0.000                  | 0.005                  |
| 4     | 8        | <0.20         | 0.000                  | 0.016                  | <0.06         | 0.000                  | 0.005                  |
| 5     | 1        | <0.20         | 0.000                  | 0.016                  | <0.06         | 0.000                  | 0.005                  |
| 5     | 2        | <0.20         | 0.000                  | 0.016                  | <0.06         | 0.000                  | 0.005                  |
| 5     | 3        | <0.20         | 0.000                  | 0.016                  | <0.06         | 0.000                  | 0.005                  |
| 5     | 4        | <0.20         | 0.000                  | 0.016                  | <0.06         | 0.000                  | 0.005                  |
| 5     | 5        | <0.20         | 0.000                  | 0.016                  | <0.06         | 0.000                  | 0.005                  |
| 5     | 6        | <0.20         | 0.000                  | 0.016                  | <0.06         | 0.000                  | 0.005                  |
| 5     | 7        | <0.20         | 0.000                  | 0.016                  | <0.06         | 0.000                  | 0.005                  |
| 5     | 8        | <0.20         | 0.000                  | 0.016                  | <0.06         | 0.000                  | 0.005                  |
|       |          |               | Σ min                  | Σ max                  |               | Σ min                  | Σ max                  |
| 1     |          |               | 0.000                  | 0.128                  |               |                        |                        |
| 2     |          |               | 0.000                  | 0.128                  |               | 0.000                  | 0.038                  |
| 3     |          |               | 0.000                  | 0.128                  |               | 0.011                  | 0.040                  |
| 4     |          |               | 0.000                  | 0.128                  |               | 0.000                  | 0.038                  |
| 5     |          |               | 0.000                  | 0.128                  |               | 0.000                  | 0.038                  |
| Mean  |          |               | 0.000                  | 0.128                  |               | 0.003                  | 0.039                  |
| SD    |          |               | 0.000                  | 0.000                  |               | 0.005                  | 0.001                  |

**Table G.** Continued CUS.

| Stone | Fraction | LAB 1              | min                    | max                    | LAB 2              | min                    | max                    |
|-------|----------|--------------------|------------------------|------------------------|--------------------|------------------------|------------------------|
|       |          | CUS1<br>Zn<br>µg/l | r<br>mg/m <sup>2</sup> | r<br>mg/m <sup>2</sup> | CUS1<br>Zn<br>µg/l | r<br>mg/m <sup>2</sup> | r<br>mg/m <sup>2</sup> |
| 1     | 1        | 283                | 22.61                  | 22.61                  | 27.4               | 2.19                   | 2.19                   |
| 1     | 2        | 469                | 37.53                  | 37.53                  | 26.1               | 2.09                   | 2.09                   |
| 1     | 3        | 395                | 31.57                  | 31.57                  | 60.6               | 4.84                   | 4.84                   |
| 1     | 4        | 153                | 12.21                  | 12.21                  | 70.9               | 5.66                   | 5.66                   |
| 1     | 5        | 439                | 35.12                  | 35.12                  | 103                | 8.21                   | 8.21                   |
| 1     | 6        | 303                | 24.26                  | 24.26                  | 71.7               | 5.73                   | 5.73                   |
| 1     | 7        | 338                | 27.06                  | 27.06                  | 85.5               | 6.83                   | 6.83                   |
| 1     | 8        | 281                | 22.45                  | 22.45                  | 73.1               | 5.84                   | 5.84                   |
| 2     | 1        | 493                | 39.41                  | 39.41                  | 14.1               | 1.13                   | 1.13                   |
| 2     | 2        | 300                | 23.97                  | 23.97                  | 11.1               | 0.89                   | 0.89                   |
| 2     | 3        | 256                | 20.51                  | 20.51                  | 35.5               | 2.84                   | 2.84                   |
| 2     | 4        | 256                | 20.44                  | 20.44                  | 59.2               | 4.74                   | 4.74                   |
| 2     | 5        | 251                | 20.10                  | 20.10                  | 134                | 10.7                   | 10.7                   |
| 2     | 6        | 327                | 26.12                  | 26.12                  | 102                | 8.16                   | 8.16                   |
| 2     | 7        | 595                | 47.57                  | 47.57                  | 118                | 9.46                   | 9.46                   |
| 2     | 8        | 285                | 22.82                  | 22.82                  | 85.3               | 6.82                   | 6.82                   |
| 3     | 1        | 427                | 34.14                  | 34.14                  | 10.1               | 0.81                   | 0.81                   |
| 3     | 2        | 412                | 32.93                  | 32.93                  | 11.4               | 0.91                   | 0.91                   |
| 3     | 3        | 453                | 36.27                  | 36.27                  | 47.6               | 3.81                   | 3.81                   |
| 3     | 4        | 345                | 27.61                  | 27.61                  | 43.9               | 3.51                   | 3.51                   |
| 3     | 5        | 286                | 22.84                  | 22.84                  | 60.1               | 4.81                   | 4.81                   |
| 3     | 6        | 392                | 31.33                  | 31.33                  | 37.8               | 3.02                   | 3.02                   |
| 3     | 7        | 537                | 42.95                  | 42.95                  | 50.8               | 4.06                   | 4.06                   |
| 3     | 8        | 368                | 29.40                  | 29.40                  | 53.2               | 4.26                   | 4.26                   |
| 4     | 1        | 387                | 30.93                  | 30.93                  | 38.3               | 3.06                   | 3.06                   |
| 4     | 2        | 454                | 36.33                  | 36.33                  | 21.4               | 1.71                   | 1.71                   |
| 4     | 3        | 229                | 18.31                  | 18.31                  | 58.3               | 4.66                   | 4.66                   |
| 4     | 4        | 424                | 33.91                  | 33.91                  | 132.0              | 10.6                   | 10.6                   |
| 4     | 5        | 182                | 14.58                  | 14.58                  | 298                | 23.8                   | 23.8                   |
| 4     | 6        | 325                | 26.00                  | 26.00                  | 269                | 21.5                   | 21.5                   |
| 4     | 7        | 415                | 33.18                  | 33.18                  | 337                | 26.9                   | 26.9                   |
| 4     | 8        | 331                | 26.44                  | 26.44                  | 340                | 27.1                   | 27.1                   |
| 5     | 1        | 286                | 22.87                  | 22.87                  | 18.7               | 1.50                   | 1.50                   |
| 5     | 2        | 231                | 18.48                  | 18.48                  | 7.3                | 0.58                   | 0.58                   |
| 5     | 3        | 266                | 21.25                  | 21.25                  | 26.7               | 2.14                   | 2.14                   |
| 5     | 4        | 219                | 17.48                  | 17.48                  | 43.9               | 3.52                   | 3.52                   |
| 5     | 5        | 448                | 35.82                  | 35.82                  | 71.5               | 5.73                   | 5.73                   |
| 5     | 6        | 452                | 36.14                  | 36.14                  | 40.7               | 3.26                   | 3.26                   |
| 5     | 7        | 396                | 31.65                  | 31.65                  | 59.4               | 4.76                   | 4.76                   |
| 5     | 8        | 299                | 23.91                  | 23.91                  | 58.8               | 4.71                   | 4.71                   |
|       |          |                    | Σ min                  | Σ max                  |                    | Σ min                  | Σ max                  |
| 1     |          |                    | 213                    | 213                    |                    | 41.4                   | 41.4                   |
| 2     |          |                    | 221                    | 221                    |                    | 44.7                   | 44.7                   |
| 3     |          |                    | 257                    | 257                    |                    | 25.2                   | 25.2                   |
| 4     |          |                    | 220                    | 220                    |                    | 119                    | 119                    |
| 5     |          |                    | 208                    | 208                    |                    | 26.2                   | 26.2                   |
| Mean  |          |                    | 224                    | 224                    |                    | 51.4                   | 51.4                   |
| SD    |          |                    | 20                     | 20                     |                    | 39.0                   | 39.0                   |

**Table G.** Continued CUS.

| Stone | Fraction | LAB 2<br>CUS2 | min                    | max                    | LAB 2<br>CUS3 | min                    | max                    |
|-------|----------|---------------|------------------------|------------------------|---------------|------------------------|------------------------|
|       |          | Zn<br>µg/l    | r<br>mg/m <sup>2</sup> | r<br>mg/m <sup>2</sup> | Zn<br>µg/l    | r<br>mg/m <sup>2</sup> | r<br>mg/m <sup>2</sup> |
| 1     | 1        | 61.6          | 4.93                   | 4.93                   |               |                        |                        |
| 1     | 2        | 48.1          | 3.85                   | 3.85                   |               |                        |                        |
| 1     | 3        | 29.9          | 2.39                   | 2.39                   |               |                        |                        |
| 1     | 4        | 22.4          | 1.79                   | 1.79                   |               |                        |                        |
| 1     | 5        | 33.0          | 2.64                   | 2.64                   |               |                        |                        |
| 1     | 6        | 26.9          | 2.15                   | 2.15                   |               |                        |                        |
| 1     | 7        | 44.1          | 3.53                   | 3.53                   |               |                        |                        |
| 1     | 8        | 42.7          | 3.42                   | 3.42                   |               |                        |                        |
| 2     | 1        | 52.6          | 4.20                   | 4.20                   | 14.39         | 1.15                   | 1.15                   |
| 2     | 2        | 34.7          | 2.78                   | 2.78                   | 17.62         | 1.41                   | 1.41                   |
| 2     | 3        | 26.8          | 2.15                   | 2.15                   | 12.22         | 0.98                   | 0.98                   |
| 2     | 4        | 28.1          | 2.25                   | 2.25                   | 12.52         | 1.00                   | 1.00                   |
| 2     | 5        | 53.8          | 4.31                   | 4.31                   | 19.99         | 1.60                   | 1.60                   |
| 2     | 6        | 39.7          | 3.17                   | 3.17                   | 20.34         | 1.63                   | 1.63                   |
| 2     | 7        | 146           | 11.69                  | 11.69                  | 24.20         | 1.94                   | 1.94                   |
| 2     | 8        | 179           | 14.32                  | 14.32                  | 29.40         | 2.36                   | 2.36                   |
| 3     | 1        | 19.1          | 1.53                   | 1.53                   | 15.38         | 1.23                   | 1.23                   |
| 3     | 2        | 23.6          | 1.89                   | 1.89                   | 16.92         | 1.35                   | 1.35                   |
| 3     | 3        | 32.0          | 2.56                   | 2.56                   | 18.39         | 1.47                   | 1.47                   |
| 3     | 4        | 35.2          | 2.81                   | 2.81                   | 23.96         | 1.92                   | 1.92                   |
| 3     | 5        | 35.5          | 2.84                   | 2.84                   | 42.34         | 3.39                   | 3.39                   |
| 3     | 6        | 33.8          | 2.70                   | 2.70                   | 34.92         | 2.80                   | 2.80                   |
| 3     | 7        | 47.4          | 3.79                   | 3.79                   | 40.53         | 3.24                   | 3.24                   |
| 3     | 8        | 40.2          | 3.22                   | 3.22                   | 42.71         | 3.42                   | 3.42                   |
| 4     | 1        | 58.0          | 4.64                   | 4.64                   | 10.31         | 0.82                   | 0.82                   |
| 4     | 2        | 33.5          | 2.68                   | 2.68                   | 11.85         | 0.95                   | 0.95                   |
| 4     | 3        | 22.8          | 1.82                   | 1.82                   | 9.62          | 0.77                   | 0.77                   |
| 4     | 4        | 18.7          | 1.50                   | 1.50                   | 16.01         | 1.28                   | 1.28                   |
| 4     | 5        | 22.3          | 1.79                   | 1.79                   | 28.74         | 2.30                   | 2.30                   |
| 4     | 6        | 18.0          | 1.44                   | 1.44                   | 15.94         | 1.27                   | 1.27                   |
| 4     | 7        | 30.3          | 2.43                   | 2.43                   | 22.46         | 1.80                   | 1.80                   |
| 4     | 8        | 31.0          | 2.48                   | 2.48                   | 22.41         | 1.79                   | 1.79                   |
| 5     | 1        | 97.8          | 7.82                   | 7.82                   | 12.47         | 1.00                   | 1.00                   |
| 5     | 2        | 60.1          | 4.81                   | 4.81                   | 12.63         | 1.01                   | 1.01                   |
| 5     | 3        | 49.7          | 3.98                   | 3.98                   | 12.21         | 0.98                   | 0.98                   |
| 5     | 4        | 43.8          | 3.51                   | 3.51                   | 12.71         | 1.02                   | 1.02                   |
| 5     | 5        | 78.1          | 6.25                   | 6.25                   | 21.35         | 1.71                   | 1.71                   |
| 5     | 6        | 58.4          | 4.67                   | 4.67                   | 23.62         | 1.89                   | 1.89                   |
| 5     | 7        | 92.1          | 7.37                   | 7.37                   | 20.40         | 1.63                   | 1.63                   |
| 5     | 8        | 94.3          | 7.54                   | 7.54                   | 20.16         | 1.61                   | 1.61                   |
|       |          |               | Σ min                  | Σ max                  |               | Σ min                  | Σ max                  |
| 1     |          |               | 24.68                  | 24.68                  |               |                        |                        |
| 2     |          |               | 44.86                  | 44.86                  |               | 12.07                  | 12.07                  |
| 3     |          |               | 21.33                  | 21.33                  |               | 18.83                  | 18.83                  |
| 4     |          |               | 18.79                  | 18.79                  |               | 10.98                  | 10.98                  |
| 5     |          |               | 45.94                  | 45.94                  |               | 10.84                  | 10.84                  |
| Mean  |          |               | 31.12                  | 31.12                  |               | 13.18                  | 13.18                  |
| SD    |          |               | 13.21                  | 13.21                  |               | 3.80                   | 3.80                   |

**Table H.** DSLT results LDS (LAB 1 DSLT contract laboratory, LAB 2 DSLT BfG)

| Stone | Fraction | LAB 1<br>Al<br>µg/l | min<br>r<br>mg/m <sup>2</sup> | max<br>r<br>mg/m <sup>2</sup> | LAB 2<br>Al<br>µg/l | min<br>r<br>mg/m <sup>2</sup> | max<br>r<br>mg/m <sup>2</sup> |
|-------|----------|---------------------|-------------------------------|-------------------------------|---------------------|-------------------------------|-------------------------------|
| 1     | 1        | 57                  | 5                             | 5                             | 46                  | 3.7                           | 3.7                           |
| 1     | 2        | 42                  | 3                             | 3                             | 43                  | 3.4                           | 3.4                           |
| 1     | 3        | 60                  | 5                             | 5                             | 42                  | 3.4                           | 3.4                           |
| 1     | 4        | 73                  | 6                             | 6                             | 49                  | 3.9                           | 3.9                           |
| 1     | 5        | 103                 | 8                             | 8                             | 49                  | 3.9                           | 3.9                           |
| 1     | 6        | 73                  | 6                             | 6                             | 80                  | 6.4                           | 6.4                           |
| 1     | 7        | 1363                | 109                           | 109                           | 93                  | 7.4                           | 7.4                           |
| 1     | 8        | 1414                | 113                           | 113                           | 161                 | 12.9                          | 12.9                          |
| 2     | 1        | <40.8               | 0                             | 3                             | 50                  | 4.0                           | 4.0                           |
| 2     | 2        | <40.8               | 0                             | 3                             | 109                 | 8.7                           | 8.7                           |
| 2     | 3        | <40.8               | 0                             | 3                             | 161                 | 12.9                          | 12.9                          |
| 2     | 4        | <40.8               | 0                             | 3                             | 210                 | 16.8                          | 16.8                          |
| 2     | 5        | <40.8               | 0                             | 3                             | 371                 | 29.7                          | 29.7                          |
| 2     | 6        | 78                  | 6                             | 6                             | 611                 | 48.9                          | 48.9                          |
| 2     | 7        | <40.8               | 0                             | 3                             | 717                 | 57.3                          | 57.3                          |
| 2     | 8        | <40.8               | 0                             | 3                             | 628                 | 50.2                          | 50.2                          |
| 3     | 1        | 921                 | 74                            | 74                            | 47                  | 3.7                           | 3.7                           |
| 3     | 2        | 1916                | 153                           | 153                           | 83                  | 6.6                           | 6.6                           |
| 3     | 3        | 2893                | 231                           | 231                           | 116                 | 9.3                           | 9.3                           |
| 3     | 4        | 3039                | 243                           | 243                           | 203                 | 16.2                          | 16.2                          |
| 3     | 5        | 2775                | 222                           | 222                           | 374                 | 29.9                          | 29.9                          |
| 3     | 6        | 568                 | 45                            | 45                            | 508                 | 40.6                          | 40.6                          |
| 3     | 7        | 3384                | 271                           | 271                           | 573                 | 45.9                          | 45.9                          |
| 3     | 8        | 1948                | 156                           | 156                           | 622                 | 49.8                          | 49.8                          |
| 4     | 1        | 83                  | 7                             | 7                             | 43                  | 3.5                           | 3.5                           |
| 4     | 2        | 185                 | 15                            | 15                            | 57                  | 4.6                           | 4.6                           |
| 4     | 3        | 233                 | 19                            | 19                            | 74                  | 5.9                           | 5.9                           |
| 4     | 4        | 187                 | 15                            | 15                            | 108                 | 8.6                           | 8.6                           |
| 4     | 5        | 313                 | 25                            | 25                            | 191                 | 15.3                          | 15.3                          |
| 4     | 6        | 226                 | 18                            | 18                            | 268                 | 21.5                          | 21.5                          |
| 4     | 7        | 364                 | 29                            | 29                            | 369                 | 29.6                          | 29.6                          |
| 4     | 8        | 292                 | 23                            | 23                            | 442                 | 35.4                          | 35.4                          |
| 5     | 1        | <40.8               | 0                             | 3                             | 44                  | 3.6                           | 3.6                           |
| 5     | 2        | 75                  | 6                             | 6                             | 94                  | 7.5                           | 7.5                           |
| 5     | 3        | 102                 | 8                             | 8                             | 131                 | 10.5                          | 10.5                          |
| 5     | 4        | 104                 | 8                             | 8                             | 201                 | 16.1                          | 16.1                          |
| 5     | 5        | 137                 | 11                            | 11                            | 343                 | 27.4                          | 27.4                          |
| 5     | 6        | 87                  | 7                             | 7                             | 477                 | 38.1                          | 38.1                          |
| 5     | 7        | 113                 | 9                             | 9                             | 564                 | 45.1                          | 45.1                          |
| 5     | 8        | 62                  | 5                             | 5                             | 585                 | 46.8                          | 46.8                          |
|       |          |                     | Σ Min                         | Σ Max                         |                     | Σ Min                         | Σ Max                         |
| 1     |          |                     | 255                           | 255                           |                     | 45.0                          | 45.0                          |
| 2     |          |                     | 6                             | 29                            |                     | 228.5                         | 228.5                         |
| 3     |          |                     | 1396                          | 1396                          |                     | 202.1                         | 202.1                         |
| 4     |          |                     | 151                           | 151                           |                     | 124.3                         | 124.3                         |
| 5     |          |                     | 55                            | 58                            |                     | 195.0                         | 195.0                         |
| Mean  |          |                     | 372                           | 378                           |                     | 159.0                         | 159.0                         |
| SD    |          |                     | 580                           | 576                           |                     | 74.5                          | 74.5                          |

**Table H.** Continued LDS.

| Stone | Fraction | LAB 1<br>As<br>µg/l | min<br>r<br>mg/m <sup>2</sup> | max<br>r<br>mg/m <sup>2</sup> | LAB 2<br>As<br>µg/l | min<br>r<br>mg/m <sup>2</sup> | max<br>r<br>mg/m <sup>2</sup> |
|-------|----------|---------------------|-------------------------------|-------------------------------|---------------------|-------------------------------|-------------------------------|
| 1     | 1        | 0.05                | 0.004                         | 0.004                         | <0.04               | 0.000                         | 0.003                         |
| 1     | 2        | 0.04                | 0.003                         | 0.003                         | <0.04               | 0.000                         | 0.003                         |
| 1     | 3        | 0.03                | 0.003                         | 0.003                         | <0.04               | 0.000                         | 0.003                         |
| 1     | 4        | 0.03                | 0.003                         | 0.003                         | <0.04               | 0.000                         | 0.003                         |
| 1     | 5        | 0.04                | 0.003                         | 0.003                         | <0.04               | 0.000                         | 0.003                         |
| 1     | 6        | 0.04                | 0.003                         | 0.003                         | <0.04               | 0.000                         | 0.003                         |
| 1     | 7        | <0.03               | 0.000                         | 0.002                         | <0.04               | 0.000                         | 0.003                         |
| 1     | 8        | <0.03               | 0.000                         | 0.002                         | <0.04               | 0.000                         | 0.003                         |
| 2     | 1        | 0.04                | 0.003                         | 0.003                         | <0.04               | 0.000                         | 0.003                         |
| 2     | 2        | 0.04                | 0.003                         | 0.003                         | <0.04               | 0.000                         | 0.003                         |
| 2     | 3        | 0.04                | 0.003                         | 0.003                         | <0.04               | 0.000                         | 0.003                         |
| 2     | 4        | 0.03                | 0.003                         | 0.003                         | <0.04               | 0.000                         | 0.003                         |
| 2     | 5        | 0.04                | 0.003                         | 0.003                         | <0.04               | 0.000                         | 0.003                         |
| 2     | 6        | 0.05                | 0.004                         | 0.004                         | <0.04               | 0.000                         | 0.003                         |
| 2     | 7        | 0.03                | 0.003                         | 0.003                         | <0.04               | 0.000                         | 0.003                         |
| 2     | 8        | 0.03                | 0.002                         | 0.002                         | <0.04               | 0.000                         | 0.003                         |
| 3     | 1        | 0.05                | 0.004                         | 0.004                         | <0.04               | 0.000                         | 0.003                         |
| 3     | 2        | 0.03                | 0.002                         | 0.002                         | <0.04               | 0.000                         | 0.003                         |
| 3     | 3        | 0.04                | 0.003                         | 0.003                         | <0.04               | 0.000                         | 0.003                         |
| 3     | 4        | 0.02                | 0.002                         | 0.002                         | <0.04               | 0.000                         | 0.003                         |
| 3     | 5        | 0.04                | 0.003                         | 0.003                         | <0.04               | 0.000                         | 0.003                         |
| 3     | 6        | 0.05                | 0.004                         | 0.004                         | <0.04               | 0.000                         | 0.003                         |
| 3     | 7        | 0.03                | 0.003                         | 0.003                         | <0.04               | 0.000                         | 0.003                         |
| 3     | 8        | 0.08                | 0.006                         | 0.006                         | <0.04               | 0.000                         | 0.003                         |
| 4     | 1        | 0.03                | 0.002                         | 0.002                         | <0.04               | 0.000                         | 0.003                         |
| 4     | 2        | <0.03               | 0.000                         | 0.002                         | <0.04               | 0.000                         | 0.003                         |
| 4     | 3        | 0.03                | 0.002                         | 0.002                         | <0.04               | 0.000                         | 0.003                         |
| 4     | 4        | <0.03               | 0.000                         | 0.002                         | <0.04               | 0.000                         | 0.003                         |
| 4     | 5        | <0.03               | 0.000                         | 0.002                         | <0.04               | 0.000                         | 0.003                         |
| 4     | 6        | <0.03               | 0.000                         | 0.002                         | <0.04               | 0.000                         | 0.003                         |
| 4     | 7        | <0.03               | 0.000                         | 0.002                         | <0.04               | 0.000                         | 0.003                         |
| 4     | 8        | <0.03               | 0.000                         | 0.002                         | <0.04               | 0.000                         | 0.003                         |
| 5     | 1        | 0.03                | 0.003                         | 0.003                         | <0.04               | 0.000                         | 0.003                         |
| 5     | 2        | 0.03                | 0.002                         | 0.002                         | <0.04               | 0.000                         | 0.003                         |
| 5     | 3        | 0.03                | 0.002                         | 0.002                         | <0.04               | 0.000                         | 0.003                         |
| 5     | 4        | 0.03                | 0.002                         | 0.002                         | <0.04               | 0.000                         | 0.003                         |
| 5     | 5        | <0.03               | 0.000                         | 0.002                         | <0.04               | 0.000                         | 0.003                         |
| 5     | 6        | <0.03               | 0.000                         | 0.002                         | <0.04               | 0.000                         | 0.003                         |
| 5     | 7        | <0.03               | 0.000                         | 0.002                         | <0.04               | 0.000                         | 0.003                         |
| 5     | 8        | <0.03               | 0.000                         | 0.002                         | <0.04               | 0.000                         | 0.003                         |
|       |          |                     | Σ Min                         | Σ Max                         |                     | Σ Min                         | Σ Max                         |
| 1     |          |                     | 0.018                         | 0.023                         |                     | 0.000                         | 0.026                         |
| 2     |          |                     | 0.024                         | 0.024                         |                     | 0.000                         | 0.026                         |
| 3     |          |                     | 0.027                         | 0.027                         |                     | 0.000                         | 0.026                         |
| 4     |          |                     | 0.005                         | 0.019                         |                     | 0.000                         | 0.026                         |
| 5     |          |                     | 0.009                         | 0.019                         |                     | 0.000                         | 0.026                         |
| Mean  |          |                     | 0.017                         | 0.022                         |                     | 0.000                         | 0.026                         |
| SD    |          |                     | 0.010                         | 0.004                         |                     | 0.000                         | 0.000                         |

**Table H.** Continued LDS.

| Stone | Fraction | LAB 1<br>Ba<br>µg/l | min<br>r<br>mg/m <sup>2</sup> | max<br>r<br>mg/m <sup>2</sup> | LAB 2<br>Ba<br>µg/l | min<br>r<br>mg/m <sup>2</sup> | max<br>r<br>mg/m <sup>2</sup> |
|-------|----------|---------------------|-------------------------------|-------------------------------|---------------------|-------------------------------|-------------------------------|
| 1     | 1        | 492                 | 39.3                          | 39.3                          | 1.14                | 0.09                          | 0.09                          |
| 1     | 2        | 469                 | 37.5                          | 37.5                          | 1.21                | 0.10                          | 0.10                          |
| 1     | 3        | 500                 | 40.0                          | 40.0                          | 1.30                | 0.10                          | 0.10                          |
| 1     | 4        | 492                 | 39.3                          | 39.3                          | 1.71                | 0.14                          | 0.14                          |
| 1     | 5        | 26                  | 2.1                           | 2.1                           | 2.24                | 0.18                          | 0.18                          |
| 1     | 6        | 487                 | 39.0                          | 39.0                          | 2.48                | 0.20                          | 0.20                          |
| 1     | 7        | 378                 | 30.3                          | 30.3                          | 3.10                | 0.25                          | 0.25                          |
| 1     | 8        | 428                 | 34.2                          | 34.2                          | 3.65                | 0.29                          | 0.29                          |
| 2     | 1        | 366                 | 29.3                          | 29.3                          | 1.49                | 0.12                          | 0.12                          |
| 2     | 2        | 461                 | 36.9                          | 36.9                          | 1.42                | 0.11                          | 0.11                          |
| 2     | 3        | 497                 | 39.8                          | 39.8                          | 1.80                | 0.14                          | 0.14                          |
| 2     | 4        | 235                 | 18.8                          | 18.8                          | 2.44                | 0.19                          | 0.19                          |
| 2     | 5        | 484                 | 38.7                          | 38.7                          | 4.86                | 0.39                          | 0.39                          |
| 2     | 6        | 488                 | 39.0                          | 39.0                          | 8.48                | 0.68                          | 0.68                          |
| 2     | 7        | 175                 | 14.0                          | 14.0                          | 13.87               | 1.11                          | 1.11                          |
| 2     | 8        | 385                 | 30.8                          | 30.8                          | 18.36               | 1.47                          | 1.47                          |
| 3     | 1        | 445                 | 35.6                          | 35.6                          | 1.09                | 0.09                          | 0.09                          |
| 3     | 2        | 121                 | 9.7                           | 9.7                           | 1.33                | 0.11                          | 0.11                          |
| 3     | 3        | 143                 | 11.5                          | 11.5                          | 1.67                | 0.13                          | 0.13                          |
| 3     | 4        | 203                 | 16.2                          | 16.2                          | 2.41                | 0.19                          | 0.19                          |
| 3     | 5        | 499                 | 39.9                          | 39.9                          | 4.73                | 0.38                          | 0.38                          |
| 3     | 6        | 505                 | 40.4                          | 40.4                          | 6.90                | 0.55                          | 0.55                          |
| 3     | 7        | 429                 | 34.4                          | 34.4                          | 10.30               | 0.82                          | 0.82                          |
| 3     | 8        | 571                 | 45.6                          | 45.6                          | 12.67               | 1.01                          | 1.01                          |
| 4     | 1        | 506                 | 40.5                          | 40.5                          | 1.19                | 0.10                          | 0.10                          |
| 4     | 2        | 498                 | 39.9                          | 39.9                          | <0.81               | 0.00                          | 0.06                          |
| 4     | 3        | 345                 | 27.6                          | 27.6                          | 1.26                | 0.10                          | 0.10                          |
| 4     | 4        | 473                 | 37.8                          | 37.8                          | 1.39                | 0.11                          | 0.11                          |
| 4     | 5        | 469                 | 37.5                          | 37.5                          | 2.13                | 0.17                          | 0.17                          |
| 4     | 6        | 391                 | 31.3                          | 31.3                          | 2.66                | 0.21                          | 0.21                          |
| 4     | 7        | 420                 | 33.6                          | 33.6                          | 3.59                | 0.29                          | 0.29                          |
| 4     | 8        | 371                 | 29.6                          | 29.6                          | 4.13                | 0.33                          | 0.33                          |
| 5     | 1        | 281                 | 22.4                          | 22.4                          | 1.29                | 0.10                          | 0.10                          |
| 5     | 2        | 440                 | 35.2                          | 35.2                          | 1.16                | 0.09                          | 0.09                          |
| 5     | 3        | 508                 | 40.7                          | 40.7                          | 1.78                | 0.14                          | 0.14                          |
| 5     | 4        | 529                 | 42.3                          | 42.3                          | 2.72                | 0.22                          | 0.22                          |
| 5     | 5        | 22                  | 1.8                           | 1.8                           | 4.65                | 0.37                          | 0.37                          |
| 5     | 6        | 431                 | 34.5                          | 34.5                          | 6.95                | 0.56                          | 0.56                          |
| 5     | 7        | 368                 | 29.4                          | 29.4                          | 12.30               | 0.98                          | 0.98                          |
| 5     | 8        | 342                 | 27.4                          | 27.4                          | 17.60               | 1.41                          | 1.41                          |
|       |          |                     | Σ Min                         | Σ Max                         |                     | Σ Min                         | Σ Max                         |
| 1     |          |                     | 261.6                         | 261.6                         |                     | 1.35                          | 1.35                          |
| 2     |          |                     | 247.3                         | 247.3                         |                     | 4.22                          | 4.22                          |
| 3     |          |                     | 233.3                         | 233.3                         |                     | 3.29                          | 3.29                          |
| 4     |          |                     | 277.7                         | 277.7                         |                     | 1.31                          | 1.37                          |
| 5     |          |                     | 233.6                         | 233.6                         |                     | 3.88                          | 3.88                          |
| Mean  |          |                     | 250.7                         | 250.7                         |                     | 2.81                          | 2.82                          |
| SD    |          |                     | 19.1                          | 19.1                          |                     | 1.39                          | 1.37                          |

**Table H.** Continued LDS.

| Stone | Fraction | LAB 1<br>Cd<br>µg/l | min<br>r<br>mg/m2 | max<br>r<br>mg/m2 | LAB 2<br>Cd<br>µg/l | min<br>r<br>mg/m2 | max<br>r<br>mg/m2 |
|-------|----------|---------------------|-------------------|-------------------|---------------------|-------------------|-------------------|
| 1     | 1        | 0.0218              | 0.002             | 0.002             | <0.01               | 0.000             | 0.001             |
| 1     | 2        | 0.0286              | 0.002             | 0.002             | <0.01               | 0.000             | 0.001             |
| 1     | 3        | 0.0314              | 0.003             | 0.003             | <0.01               | 0.000             | 0.001             |
| 1     | 4        | 0.0274              | 0.002             | 0.002             | <0.01               | 0.000             | 0.001             |
| 1     | 5        | <0.01               | 0.000             | 0.001             | <0.01               | 0.000             | 0.001             |
| 1     | 6        | 0.0289              | 0.002             | 0.002             | <0.01               | 0.000             | 0.001             |
| 1     | 7        | 0.0122              | 0.001             | 0.001             | <0.01               | 0.000             | 0.001             |
| 1     | 8        | 0.0083              | 0.001             | 0.001             | <0.01               | 0.000             | 0.001             |
| 2     | 1        | 0.0211              | 0.002             | 0.002             | <0.01               | 0.000             | 0.001             |
| 2     | 2        | 0.0293              | 0.002             | 0.002             | <0.01               | 0.000             | 0.001             |
| 2     | 3        | 0.0261              | 0.002             | 0.002             | <0.01               | 0.000             | 0.001             |
| 2     | 4        | 0.0175              | 0.001             | 0.001             | <0.01               | 0.000             | 0.001             |
| 2     | 5        | 0.0231              | 0.002             | 0.002             | <0.01               | 0.000             | 0.001             |
| 2     | 6        | 0.0265              | 0.002             | 0.002             | <0.01               | 0.000             | 0.001             |
| 2     | 7        | 0.0131              | 0.001             | 0.001             | <0.01               | 0.000             | 0.001             |
| 2     | 8        | 0.0225              | 0.002             | 0.002             | <0.01               | 0.000             | 0.001             |
| 3     | 1        | 0.0353              | 0.003             | 0.003             | <0.01               | 0.000             | 0.001             |
| 3     | 2        | 0.0127              | 0.001             | 0.001             | <0.01               | 0.000             | 0.001             |
| 3     | 3        | 0.0120              | 0.001             | 0.001             | <0.01               | 0.000             | 0.001             |
| 3     | 4        | 0.0169              | 0.001             | 0.001             | <0.01               | 0.000             | 0.001             |
| 3     | 5        | 0.0331              | 0.003             | 0.003             | <0.01               | 0.000             | 0.001             |
| 3     | 6        | 0.0388              | 0.003             | 0.003             | <0.01               | 0.000             | 0.001             |
| 3     | 7        | 0.0289              | 0.002             | 0.002             | <0.01               | 0.000             | 0.001             |
| 3     | 8        | 0.0293              | 0.002             | 0.002             | <0.01               | 0.000             | 0.001             |
| 4     | 1        | 0.0243              | 0.002             | 0.002             | <0.01               | 0.000             | 0.001             |
| 4     | 2        | 0.0127              | 0.001             | 0.001             | <0.01               | 0.000             | 0.001             |
| 4     | 3        | 0.0155              | 0.001             | 0.001             | <0.01               | 0.000             | 0.001             |
| 4     | 4        | 0.0169              | 0.001             | 0.001             | <0.01               | 0.000             | 0.001             |
| 4     | 5        | 0.0199              | 0.002             | 0.002             | <0.01               | 0.000             | 0.001             |
| 4     | 6        | 0.0143              | 0.001             | 0.001             | <0.01               | 0.000             | 0.001             |
| 4     | 7        | 0.0130              | 0.001             | 0.001             | <0.01               | 0.000             | 0.001             |
| 4     | 8        | 0.0075              | 0.001             | 0.001             | <0.01               | 0.000             | 0.001             |
| 5     | 1        | 0.0120              | 0.001             | 0.001             | <0.01               | 0.000             | 0.001             |
| 5     | 2        | 0.0247              | 0.002             | 0.002             | <0.01               | 0.000             | 0.001             |
| 5     | 3        | 0.0203              | 0.002             | 0.002             | <0.01               | 0.000             | 0.001             |
| 5     | 4        | 0.0297              | 0.002             | 0.002             | <0.01               | 0.000             | 0.001             |
| 5     | 5        | <0.01               | 0.000             | 0.001             | <0.01               | 0.000             | 0.001             |
| 5     | 6        | 0.0168              | 0.001             | 0.001             | <0.01               | 0.000             | 0.001             |
| 5     | 7        | 0.0153              | 0.001             | 0.001             | <0.01               | 0.000             | 0.001             |
| 5     | 8        | 0.0142              | 0.001             | 0.001             | <0.01               | 0.000             | 0.001             |
|       |          |                     | Σ Min             | Σ Max             |                     | Σ Min             | Σ Max             |
| 1     |          |                     | 0.013             | 0.013             |                     | 0.000             | 0.006             |
| 2     |          |                     | 0.014             | 0.014             |                     | 0.000             | 0.006             |
| 3     |          |                     | 0.017             | 0.017             |                     | 0.000             | 0.006             |
| 4     |          |                     | 0.010             | 0.010             |                     | 0.000             | 0.006             |
| 5     |          |                     | 0.011             | 0.011             |                     | 0.000             | 0.006             |
| Mean  |          |                     | 0.013             | 0.013             |                     | 0.000             | 0.006             |
| SD    |          |                     | 0.003             | 0.003             |                     | 0.000             | 0.000             |

**Table H.** Continued LDS.

| Stone | Fraction | LAB 1<br>Co<br>µg/l | min<br>r<br>mg/m <sup>2</sup> | max<br>r<br>mg/m <sup>2</sup> | LAB 2<br>Co<br>µg/l | min<br>r<br>mg/m <sup>2</sup> | max<br>r<br>mg/m <sup>2</sup> |
|-------|----------|---------------------|-------------------------------|-------------------------------|---------------------|-------------------------------|-------------------------------|
| 1     | 1        | 0.08                | 0.006                         | 0.006                         | <0.01               | 0.000                         | 0.001                         |
| 1     | 2        | 0.07                | 0.006                         | 0.006                         | <0.01               | 0.000                         | 0.001                         |
| 1     | 3        | 0.08                | 0.007                         | 0.007                         | <0.01               | 0.000                         | 0.001                         |
| 1     | 4        | 0.07                | 0.006                         | 0.006                         | <0.01               | 0.000                         | 0.001                         |
| 1     | 5        | <0.02               | 0.000                         | 0.002                         | <0.01               | 0.000                         | 0.001                         |
| 1     | 6        | 0.07                | 0.005                         | 0.005                         | <0.01               | 0.000                         | 0.001                         |
| 1     | 7        | 0.08                | 0.007                         | 0.007                         | <0.01               | 0.000                         | 0.001                         |
| 1     | 8        | 0.05                | 0.004                         | 0.004                         | <0.01               | 0.000                         | 0.001                         |
| 2     | 1        | 0.06                | 0.005                         | 0.005                         | <0.01               | 0.000                         | 0.001                         |
| 2     | 2        | 0.07                | 0.005                         | 0.005                         | <0.01               | 0.000                         | 0.001                         |
| 2     | 3        | 0.09                | 0.007                         | 0.007                         | <0.01               | 0.000                         | 0.001                         |
| 2     | 4        | 0.05                | 0.004                         | 0.004                         | <0.01               | 0.000                         | 0.001                         |
| 2     | 5        | 0.07                | 0.005                         | 0.005                         | <0.01               | 0.000                         | 0.001                         |
| 2     | 6        | 0.12                | 0.009                         | 0.009                         | <0.01               | 0.000                         | 0.001                         |
| 2     | 7        | 0.07                | 0.005                         | 0.005                         | <0.01               | 0.000                         | 0.001                         |
| 2     | 8        | 0.11                | 0.009                         | 0.009                         | <0.01               | 0.000                         | 0.001                         |
| 3     | 1        | 0.08                | 0.006                         | 0.006                         | <0.01               | 0.000                         | 0.001                         |
| 3     | 2        | 0.04                | 0.004                         | 0.004                         | <0.01               | 0.000                         | 0.001                         |
| 3     | 3        | 0.06                | 0.005                         | 0.005                         | <0.01               | 0.000                         | 0.001                         |
| 3     | 4        | 0.05                | 0.004                         | 0.004                         | <0.01               | 0.000                         | 0.001                         |
| 3     | 5        | 0.07                | 0.006                         | 0.006                         | <0.01               | 0.000                         | 0.001                         |
| 3     | 6        | 0.08                | 0.006                         | 0.006                         | <0.01               | 0.000                         | 0.001                         |
| 3     | 7        | 0.11                | 0.009                         | 0.009                         | <0.01               | 0.000                         | 0.001                         |
| 3     | 8        | 0.11                | 0.008                         | 0.008                         | <0.01               | 0.000                         | 0.001                         |
| 4     | 1        | 0.07                | 0.005                         | 0.005                         | 0.02                | 0.002                         | 0.002                         |
| 4     | 2        | 0.04                | 0.003                         | 0.003                         | <0.01               | 0.000                         | 0.001                         |
| 4     | 3        | 0.07                | 0.005                         | 0.005                         | <0.01               | 0.000                         | 0.001                         |
| 4     | 4        | 0.04                | 0.004                         | 0.004                         | <0.01               | 0.000                         | 0.001                         |
| 4     | 5        | 0.04                | 0.004                         | 0.004                         | <0.01               | 0.000                         | 0.001                         |
| 4     | 6        | 0.09                | 0.007                         | 0.007                         | <0.01               | 0.000                         | 0.001                         |
| 4     | 7        | 0.09                | 0.007                         | 0.007                         | <0.01               | 0.000                         | 0.001                         |
| 4     | 8        | 0.07                | 0.005                         | 0.005                         | <0.01               | 0.000                         | 0.001                         |
| 5     | 1        | 0.04                | 0.003                         | 0.003                         | <0.01               | 0.000                         | 0.001                         |
| 5     | 2        | 0.06                | 0.005                         | 0.005                         | <0.01               | 0.000                         | 0.001                         |
| 5     | 3        | 0.11                | 0.008                         | 0.008                         | <0.01               | 0.000                         | 0.001                         |
| 5     | 4        | 0.08                | 0.006                         | 0.006                         | <0.01               | 0.000                         | 0.001                         |
| 5     | 5        | 0.01                | 0.001                         | 0.001                         | <0.01               | 0.000                         | 0.001                         |
| 5     | 6        | 0.09                | 0.007                         | 0.007                         | <0.01               | 0.000                         | 0.001                         |
| 5     | 7        | 0.09                | 0.007                         | 0.007                         | <0.01               | 0.000                         | 0.001                         |
| 5     | 8        | 0.09                | 0.007                         | 0.007                         | <0.01               | 0.000                         | 0.001                         |
|       |          |                     | Σ Min                         | Σ Max                         |                     | Σ Min                         | Σ Max                         |
| 1     |          |                     | 0.040                         | 0.042                         |                     | 0.000                         | 0.006                         |
| 2     |          |                     | 0.050                         | 0.050                         |                     | 0.000                         | 0.006                         |
| 3     |          |                     | 0.047                         | 0.047                         |                     | 0.000                         | 0.006                         |
| 4     |          |                     | 0.040                         | 0.040                         |                     | 0.002                         | 0.007                         |
| 5     |          |                     | 0.044                         | 0.044                         |                     | 0.000                         | 0.006                         |
| Mean  |          |                     | 0.045                         | 0.045                         |                     | 0.000                         | 0.007                         |
| SD    |          |                     | 0.004                         | 0.004                         |                     | 0.001                         | 0.000                         |

**Table H.** Continued LDS.

| Stone | Fraction | LAB 1<br>Cr<br>µg/l | min<br>r<br>mg/m <sup>2</sup> | max<br>r<br>mg/m <sup>2</sup> | LAB 2<br>Cr<br>µg/l | min<br>r<br>mg/m <sup>2</sup> | max<br>r<br>mg/m <sup>2</sup> |
|-------|----------|---------------------|-------------------------------|-------------------------------|---------------------|-------------------------------|-------------------------------|
| 1     | 1        | 0.17                | 0.013                         | 0.013                         | 0.67                | 0.054                         | 0.054                         |
| 1     | 2        | 0.15                | 0.012                         | 0.012                         | 0.74                | 0.060                         | 0.060                         |
| 1     | 3        | 0.21                | 0.017                         | 0.017                         | 0.52                | 0.042                         | 0.042                         |
| 1     | 4        | 0.18                | 0.014                         | 0.014                         | 0.59                | 0.047                         | 0.047                         |
| 1     | 5        | 0.34                | 0.027                         | 0.027                         | 1.09                | 0.087                         | 0.087                         |
| 1     | 6        | 0.52                | 0.042                         | 0.042                         | 1.29                | 0.103                         | 0.103                         |
| 1     | 7        | 0.63                | 0.050                         | 0.050                         | 2.14                | 0.171                         | 0.171                         |
| 1     | 8        | 0.70                | 0.056                         | 0.056                         | 2.01                | 0.161                         | 0.161                         |
| 2     | 1        | 0.35                | 0.028                         | 0.028                         | 0.70                | 0.056                         | 0.056                         |
| 2     | 2        | 0.37                | 0.030                         | 0.030                         | 0.69                | 0.055                         | 0.055                         |
| 2     | 3        | 0.34                | 0.027                         | 0.027                         | 0.37                | 0.029                         | 0.029                         |
| 2     | 4        | 0.39                | 0.031                         | 0.031                         | 0.33                | 0.026                         | 0.026                         |
| 2     | 5        | 0.80                | 0.064                         | 0.064                         | 0.50                | 0.040                         | 0.040                         |
| 2     | 6        | 1.06                | 0.085                         | 0.085                         | 0.56                | 0.045                         | 0.045                         |
| 2     | 7        | 2.44                | 0.195                         | 0.195                         | 0.91                | 0.073                         | 0.073                         |
| 2     | 8        | 2.14                | 0.172                         | 0.172                         | 0.99                | 0.079                         | 0.079                         |
| 3     | 1        | 0.25                | 0.020                         | 0.020                         | 0.32                | 0.026                         | 0.026                         |
| 3     | 2        | 0.14                | 0.011                         | 0.011                         | 0.37                | 0.030                         | 0.030                         |
| 3     | 3        | 0.16                | 0.013                         | 0.013                         | 0.39                | 0.031                         | 0.031                         |
| 3     | 4        | 0.14                | 0.011                         | 0.011                         | 0.59                | 0.047                         | 0.047                         |
| 3     | 5        | 0.23                | 0.018                         | 0.018                         | 1.42                | 0.114                         | 0.114                         |
| 3     | 6        | 0.27                | 0.021                         | 0.021                         | 1.59                | 0.128                         | 0.128                         |
| 3     | 7        | 0.42                | 0.033                         | 0.033                         | 2.77                | 0.222                         | 0.222                         |
| 3     | 8        | 0.54                | 0.044                         | 0.044                         | 2.60                | 0.208                         | 0.208                         |
| 4     | 1        | 0.59                | 0.047                         | 0.047                         | 0.70                | 0.056                         | 0.056                         |
| 4     | 2        | 0.43                | 0.034                         | 0.034                         | 0.41                | 0.033                         | 0.033                         |
| 4     | 3        | 0.39                | 0.032                         | 0.032                         | 0.34                | 0.027                         | 0.027                         |
| 4     | 4        | 0.32                | 0.025                         | 0.025                         | 0.41                | 0.033                         | 0.033                         |
| 4     | 5        | 0.54                | 0.043                         | 0.043                         | 0.86                | 0.069                         | 0.069                         |
| 4     | 6        | 0.59                | 0.047                         | 0.047                         | 1.10                | 0.088                         | 0.088                         |
| 4     | 7        | 0.89                | 0.071                         | 0.071                         | 1.95                | 0.156                         | 0.156                         |
| 4     | 8        | 0.79                | 0.063                         | 0.063                         | 2.00                | 0.160                         | 0.160                         |
| 5     | 1        | 0.82                | 0.066                         | 0.066                         | 0.28                | 0.022                         | 0.022                         |
| 5     | 2        | 0.82                | 0.065                         | 0.065                         | 0.26                | 0.021                         | 0.021                         |
| 5     | 3        | 0.84                | 0.068                         | 0.068                         | 0.24                | 0.019                         | 0.019                         |
| 5     | 4        | 0.85                | 0.068                         | 0.068                         | 0.32                | 0.025                         | 0.025                         |
| 5     | 5        | 1.32                | 0.106                         | 0.106                         | 0.66                | 0.052                         | 0.052                         |
| 5     | 6        | 1.55                | 0.124                         | 0.124                         | 0.71                | 0.057                         | 0.057                         |
| 5     | 7        | 2.10                | 0.168                         | 0.168                         | 1.33                | 0.106                         | 0.106                         |
| 5     | 8        | 2.06                | 0.165                         | 0.165                         | 1.45                | 0.116                         | 0.116                         |
|       |          |                     | Σ Min                         | Σ Max                         |                     | Σ Min                         | Σ Max                         |
| 1     |          |                     | 0.231                         | 0.231                         |                     | 0.725                         | 0.725                         |
| 2     |          |                     | 0.632                         | 0.632                         |                     | 0.403                         | 0.403                         |
| 3     |          |                     | 0.172                         | 0.172                         |                     | 0.805                         | 0.805                         |
| 4     |          |                     | 0.363                         | 0.363                         |                     | 0.622                         | 0.622                         |
| 5     |          |                     | 0.829                         | 0.829                         |                     | 0.419                         | 0.419                         |
| Mean  |          |                     | 0.445                         | 0.445                         |                     | 0.595                         | 0.595                         |
| SD    |          |                     | 0.278                         | 0.278                         |                     | 0.180                         | 0.180                         |

**Table H.** Continued LDS.

| Stone | Fraction | LAB 1<br>Cu<br>µg/l | min<br>r<br>mg/m <sup>2</sup> | max<br>r<br>mg/m <sup>2</sup> | LAB 2<br>Cu<br>µg/l | min<br>r<br>mg/m <sup>2</sup> | max<br>r<br>mg/m <sup>2</sup> |
|-------|----------|---------------------|-------------------------------|-------------------------------|---------------------|-------------------------------|-------------------------------|
| 1     | 1        | 4.57                | 0.366                         | 0.366                         | 0.04                | 0.003                         | 0.003                         |
| 1     | 2        | 2.31                | 0.184                         | 0.184                         | <0.04               | 0.000                         | 0.003                         |
| 1     | 3        | 1.76                | 0.141                         | 0.141                         | <0.04               | 0.000                         | 0.003                         |
| 1     | 4        | 1.63                | 0.131                         | 0.131                         | <0.04               | 0.000                         | 0.003                         |
| 1     | 5        | 0.92                | 0.073                         | 0.073                         | 0.08                | 0.007                         | 0.007                         |
| 1     | 6        | 1.82                | 0.146                         | 0.146                         | 0.04                | 0.003                         | 0.003                         |
| 1     | 7        | 1.78                | 0.143                         | 0.143                         | 0.07                | 0.005                         | 0.005                         |
| 1     | 8        | 2.11                | 0.169                         | 0.169                         | 0.09                | 0.008                         | 0.008                         |
| 2     | 1        | 2.93                | 0.234                         | 0.234                         | 0.05                | 0.004                         | 0.004                         |
| 2     | 2        | 1.93                | 0.154                         | 0.154                         | <0.04               | 0.000                         | 0.003                         |
| 2     | 3        | 1.49                | 0.119                         | 0.119                         | 0.05                | 0.000                         | 0.004                         |
| 2     | 4        | 1.62                | 0.130                         | 0.130                         | <0.04               | 0.000                         | 0.003                         |
| 2     | 5        | 1.26                | 0.100                         | 0.100                         | 0.05                | 0.004                         | 0.004                         |
| 2     | 6        | 1.46                | 0.117                         | 0.117                         | 0.05                | 0.004                         | 0.004                         |
| 2     | 7        | 1.91                | 0.153                         | 0.153                         | 0.11                | 0.009                         | 0.009                         |
| 2     | 8        | 1.51                | 0.121                         | 0.121                         | 8.69                | 0.695                         | 0.695                         |
| 3     | 1        | 3.32                | 0.266                         | 0.266                         | 0.06                | 0.005                         | 0.005                         |
| 3     | 2        | 1.65                | 0.132                         | 0.132                         | 0.07                | 0.006                         | 0.006                         |
| 3     | 3        | 1.25                | 0.100                         | 0.100                         | <0.04               | 0.000                         | 0.003                         |
| 3     | 4        | 1.27                | 0.102                         | 0.102                         | <0.04               | 0.000                         | 0.003                         |
| 3     | 5        | 1.84                | 0.147                         | 0.147                         | 0.08                | 0.007                         | 0.007                         |
| 3     | 6        | 2.58                | 0.206                         | 0.206                         | 0.11                | 0.009                         | 0.009                         |
| 3     | 7        | 1.21                | 0.097                         | 0.097                         | 0.11                | 0.009                         | 0.009                         |
| 3     | 8        | 3.21                | 0.256                         | 0.256                         | 0.14                | 0.011                         | 0.011                         |
| 4     | 1        | 4.04                | 0.323                         | 0.323                         | 0.74                | 0.059                         | 0.059                         |
| 4     | 2        | 1.21                | 0.097                         | 0.097                         | 0.05                | 0.004                         | 0.004                         |
| 4     | 3        | 1.27                | 0.102                         | 0.102                         | <0.04               | 0.000                         | 0.003                         |
| 4     | 4        | 1.00                | 0.080                         | 0.080                         | <0.04               | 0.000                         | 0.003                         |
| 4     | 5        | 1.29                | 0.104                         | 0.104                         | 0.10                | 0.008                         | 0.008                         |
| 4     | 6        | 0.90                | 0.072                         | 0.072                         | 0.06                | 0.005                         | 0.005                         |
| 4     | 7        | 2.09                | 0.168                         | 0.168                         | 0.11                | 0.009                         | 0.009                         |
| 4     | 8        | 1.63                | 0.130                         | 0.130                         | 0.11                | 0.009                         | 0.009                         |
| 5     | 1        | 3.02                | 0.241                         | 0.241                         | 0.13                | 0.010                         | 0.010                         |
| 5     | 2        | 1.56                | 0.125                         | 0.125                         | 0.07                | 0.006                         | 0.006                         |
| 5     | 3        | 1.28                | 0.103                         | 0.103                         | 0.06                | 0.005                         | 0.005                         |
| 5     | 4        | 2.05                | 0.164                         | 0.164                         | 0.05                | 0.004                         | 0.004                         |
| 5     | 5        | 0.66                | 0.053                         | 0.053                         | 0.10                | 0.008                         | 0.008                         |
| 5     | 6        | 1.33                | 0.106                         | 0.106                         | 0.07                | 0.005                         | 0.005                         |
| 5     | 7        | 2.21                | 0.177                         | 0.177                         | 0.12                | 0.009                         | 0.009                         |
| 5     | 8        | 1.02                | 0.082                         | 0.082                         | 0.14                | 0.011                         | 0.011                         |
|       |          |                     | Σ Min                         | Σ Max                         |                     | Σ Min                         | Σ Max                         |
| 1     |          |                     | 1.353                         | 1.353                         |                     | 0.026                         | 0.036                         |
| 2     |          |                     | 1.128                         | 1.128                         |                     | 0.716                         | 0.726                         |
| 3     |          |                     | 1.307                         | 1.307                         |                     | 0.046                         | 0.053                         |
| 4     |          |                     | 1.075                         | 1.075                         |                     | 0.095                         | 0.101                         |
| 5     |          |                     | 1.051                         | 1.051                         |                     | 0.058                         | 0.058                         |
| Mean  |          |                     | 1.183                         | 1.183                         |                     | 0.188                         | 0.195                         |
| SD    |          |                     | 0.138                         | 0.138                         |                     | 0.296                         | 0.298                         |

**Table H.** Continued LDS.

| Stone | Fraction | LAB 1<br>Mn<br>µg/l | min<br>r<br>mg/m <sup>2</sup> | max<br>r<br>mg/m <sup>2</sup> | LAB 2<br>Mn<br>µg/l | min<br>r<br>mg/m <sup>2</sup> | max<br>r<br>mg/m <sup>2</sup> |
|-------|----------|---------------------|-------------------------------|-------------------------------|---------------------|-------------------------------|-------------------------------|
| 1     | 1        | 0.76                | 0.061                         | 0.061                         | 0.73                | 0.058                         | 0.058                         |
| 1     | 2        | 0.57                | 0.046                         | 0.046                         | 0.55                | 0.044                         | 0.044                         |
| 1     | 3        | 0.54                | 0.044                         | 0.044                         | 0.48                | 0.038                         | 0.038                         |
| 1     | 4        | 0.47                | 0.037                         | 0.037                         | 0.49                | 0.039                         | 0.039                         |
| 1     | 5        | 0.50                | 0.040                         | 0.040                         | 0.36                | 0.029                         | 0.029                         |
| 1     | 6        | 0.66                | 0.053                         | 0.053                         | 0.33                | 0.026                         | 0.026                         |
| 1     | 7        | 0.44                | 0.035                         | 0.035                         | 0.23                | 0.019                         | 0.019                         |
| 1     | 8        | 0.40                | 0.032                         | 0.032                         | 0.42                | 0.034                         | 0.034                         |
| 2     | 1        | 0.77                | 0.061                         | 0.061                         | 0.78                | 0.062                         | 0.062                         |
| 2     | 2        | 0.90                | 0.072                         | 0.072                         | 0.53                | 0.043                         | 0.043                         |
| 2     | 3        | 0.79                | 0.063                         | 0.063                         | 0.52                | 0.041                         | 0.041                         |
| 2     | 4        | 0.63                | 0.051                         | 0.051                         | 0.52                | 0.042                         | 0.042                         |
| 2     | 5        | 1.12                | 0.090                         | 0.090                         | 0.58                | 0.047                         | 0.047                         |
| 2     | 6        | 1.62                | 0.130                         | 0.130                         | 0.93                | 0.075                         | 0.075                         |
| 2     | 7        | 1.27                | 0.102                         | 0.102                         | 0.33                | 0.027                         | 0.027                         |
| 2     | 8        | 1.38                | 0.111                         | 0.111                         | 3.06                | 0.245                         | 0.245                         |
| 3     | 1        | 0.82                | 0.065                         | 0.065                         | 0.84                | 0.067                         | 0.067                         |
| 3     | 2        | 0.71                | 0.057                         | 0.057                         | 0.64                | 0.051                         | 0.051                         |
| 3     | 3        | 0.59                | 0.047                         | 0.047                         | 0.50                | 0.040                         | 0.040                         |
| 3     | 4        | 0.59                | 0.047                         | 0.047                         | 0.46                | 0.037                         | 0.037                         |
| 3     | 5        | 1.08                | 0.086                         | 0.086                         | 1.04                | 0.083                         | 0.083                         |
| 3     | 6        | 3.22                | 0.257                         | 0.257                         | 0.56                | 0.045                         | 0.045                         |
| 3     | 7        | 2.47                | 0.198                         | 0.198                         | 0.25                | 0.020                         | 0.020                         |
| 3     | 8        | 2.86                | 0.229                         | 0.229                         | 0.25                | 0.020                         | 0.020                         |
| 4     | 1        | 0.52                | 0.042                         | 0.042                         | 1.23                | 0.098                         | 0.098                         |
| 4     | 2        | 0.25                | 0.020                         | 0.020                         | 0.66                | 0.053                         | 0.053                         |
| 4     | 3        | 0.30                | 0.024                         | 0.024                         | 0.54                | 0.044                         | 0.044                         |
| 4     | 4        | 0.27                | 0.022                         | 0.022                         | 0.46                | 0.037                         | 0.037                         |
| 4     | 5        | 0.32                | 0.025                         | 0.025                         | 0.44                | 0.035                         | 0.035                         |
| 4     | 6        | 0.26                | 0.021                         | 0.021                         | 0.46                | 0.037                         | 0.037                         |
| 4     | 7        | 0.23                | 0.018                         | 0.018                         | 0.36                | 0.029                         | 0.029                         |
| 4     | 8        | 0.16                | 0.013                         | 0.013                         | 0.27                | 0.022                         | 0.022                         |
| 5     | 1        | 0.28                | 0.022                         | 0.022                         | 0.44                | 0.035                         | 0.035                         |
| 5     | 2        | 0.37                | 0.029                         | 0.029                         | 0.61                | 0.049                         | 0.049                         |
| 5     | 3        | 0.36                | 0.029                         | 0.029                         | 0.57                | 0.046                         | 0.046                         |
| 5     | 4        | 0.39                | 0.032                         | 0.032                         | 0.50                | 0.040                         | 0.040                         |
| 5     | 5        | 0.12                | 0.010                         | 0.010                         | 0.53                | 0.043                         | 0.043                         |
| 5     | 6        | 0.31                | 0.025                         | 0.025                         | 0.52                | 0.042                         | 0.042                         |
| 5     | 7        | 0.24                | 0.019                         | 0.019                         | 0.32                | 0.026                         | 0.026                         |
| 5     | 8        | 0.22                | 0.018                         | 0.018                         | 0.26                | 0.021                         | 0.021                         |
|       |          |                     | Σ Min                         | Σ Max                         |                     | Σ Min                         | Σ Max                         |
| 1     |          |                     | 0.348                         | 0.348                         |                     | 0.288                         | 0.288                         |
| 2     |          |                     | 0.679                         | 0.679                         |                     | 0.581                         | 0.581                         |
| 3     |          |                     | 0.986                         | 0.986                         |                     | 0.364                         | 0.364                         |
| 4     |          |                     | 0.185                         | 0.185                         |                     | 0.353                         | 0.353                         |
| 5     |          |                     | 0.183                         | 0.183                         |                     | 0.301                         | 0.301                         |
| Mean  |          |                     | 0.476                         | 0.476                         |                     | 0.377                         | 0.377                         |
| SD    |          |                     | 0.349                         | 0.349                         |                     | 0.118                         | 0.118                         |

**Table H.** Continued LDS.

| Stone | Fraction | LAB 1<br>Mo<br>µg/l | min<br>r<br>mg/m <sup>2</sup> | max<br>r<br>mg/m <sup>2</sup> | LAB 2<br>Mo<br>µg/l | min<br>r<br>mg/m <sup>2</sup> | max<br>r<br>mg/m <sup>2</sup> |
|-------|----------|---------------------|-------------------------------|-------------------------------|---------------------|-------------------------------|-------------------------------|
| 1     | 1        | 0.09                | 0.007                         | 0.007                         | 0.20                | 0.016                         | 0.016                         |
| 1     | 2        | 0.08                | 0.006                         | 0.006                         | 0.24                | 0.019                         | 0.019                         |
| 1     | 3        | 0.08                | 0.006                         | 0.006                         | 0.17                | 0.013                         | 0.013                         |
| 1     | 4        | 0.10                | 0.008                         | 0.008                         | 0.18                | 0.015                         | 0.015                         |
| 1     | 5        | 0.18                | 0.015                         | 0.015                         | 0.30                | 0.024                         | 0.024                         |
| 1     | 6        | 0.23                | 0.019                         | 0.019                         | 0.31                | 0.025                         | 0.025                         |
| 1     | 7        | 0.42                | 0.033                         | 0.033                         | 0.49                | 0.039                         | 0.039                         |
| 1     | 8        | 0.37                | 0.030                         | 0.030                         | 0.46                | 0.037                         | 0.037                         |
| 2     | 1        | 0.14                | 0.011                         | 0.011                         | 0.12                | 0.009                         | 0.009                         |
| 2     | 2        | 0.16                | 0.012                         | 0.012                         | 0.13                | 0.010                         | 0.010                         |
| 2     | 3        | 0.14                | 0.011                         | 0.011                         | 0.11                | 0.009                         | 0.009                         |
| 2     | 4        | 0.14                | 0.011                         | 0.011                         | 0.12                | 0.010                         | 0.010                         |
| 2     | 5        | 0.28                | 0.022                         | 0.022                         | 0.23                | 0.019                         | 0.019                         |
| 2     | 6        | 0.34                | 0.027                         | 0.027                         | 0.27                | 0.021                         | 0.021                         |
| 2     | 7        | 0.71                | 0.057                         | 0.057                         | 0.43                | 0.034                         | 0.034                         |
| 2     | 8        | 0.59                | 0.047                         | 0.047                         | 0.44                | 0.035                         | 0.035                         |
| 3     | 1        | 0.11                | 0.008                         | 0.008                         | 0.22                | 0.018                         | 0.018                         |
| 3     | 2        | 0.08                | 0.006                         | 0.006                         | 0.26                | 0.021                         | 0.021                         |
| 3     | 3        | 0.09                | 0.007                         | 0.007                         | 0.25                | 0.020                         | 0.020                         |
| 3     | 4        | 0.08                | 0.006                         | 0.006                         | 0.32                | 0.026                         | 0.026                         |
| 3     | 5        | 0.14                | 0.011                         | 0.011                         | 0.63                | 0.051                         | 0.051                         |
| 3     | 6        | 0.14                | 0.012                         | 0.012                         | 0.72                | 0.058                         | 0.058                         |
| 3     | 7        | 0.34                | 0.027                         | 0.027                         | 1.15                | 0.092                         | 0.092                         |
| 3     | 8        | 0.35                | 0.028                         | 0.028                         | 1.13                | 0.091                         | 0.091                         |
| 4     | 1        | 0.13                | 0.011                         | 0.011                         | 0.22                | 0.018                         | 0.018                         |
| 4     | 2        | 0.12                | 0.010                         | 0.010                         | 0.15                | 0.012                         | 0.012                         |
| 4     | 3        | 0.14                | 0.011                         | 0.011                         | 0.13                | 0.011                         | 0.011                         |
| 4     | 4        | 0.12                | 0.010                         | 0.010                         | 0.15                | 0.012                         | 0.012                         |
| 4     | 5        | 0.19                | 0.016                         | 0.016                         | 0.30                | 0.024                         | 0.024                         |
| 4     | 6        | 0.21                | 0.017                         | 0.017                         | 0.33                | 0.026                         | 0.026                         |
| 4     | 7        | 0.34                | 0.027                         | 0.027                         | 0.49                | 0.040                         | 0.040                         |
| 4     | 8        | 0.29                | 0.023                         | 0.023                         | 0.46                | 0.037                         | 0.037                         |
| 5     | 1        | 0.24                | 0.019                         | 0.019                         | <0.11               | 0.000                         | 0.009                         |
| 5     | 2        | 0.21                | 0.017                         | 0.017                         | <0.11               | 0.000                         | 0.009                         |
| 5     | 3        | 0.22                | 0.017                         | 0.017                         | <0.11               | 0.000                         | 0.009                         |
| 5     | 4        | 0.23                | 0.019                         | 0.019                         | 0.12                | 0.009                         | 0.009                         |
| 5     | 5        | 0.42                | 0.034                         | 0.034                         | 0.20                | 0.016                         | 0.016                         |
| 5     | 6        | 0.49                | 0.040                         | 0.040                         | 0.20                | 0.016                         | 0.016                         |
| 5     | 7        | 0.79                | 0.063                         | 0.063                         | 0.31                | 0.025                         | 0.025                         |
| 5     | 8        | 0.74                | 0.059                         | 0.059                         | 0.28                | 0.022                         | 0.022                         |
|       |          |                     | Σ Min                         | Σ Max                         |                     | Σ Min                         | Σ Max                         |
| 1     |          |                     | 0.124                         | 0.124                         |                     | 0.188                         | 0.188                         |
| 2     |          |                     | 0.199                         | 0.199                         |                     | 0.148                         | 0.148                         |
| 3     |          |                     | 0.106                         | 0.106                         |                     | 0.375                         | 0.375                         |
| 4     |          |                     | 0.124                         | 0.124                         |                     | 0.179                         | 0.179                         |
| 5     |          |                     | 0.267                         | 0.267                         |                     | 0.089                         | 0.115                         |
| Mean  |          |                     | 0.164                         | 0.164                         |                     | 0.196                         | 0.201                         |
| SD    |          |                     | 0.068                         | 0.068                         |                     | 0.108                         | 0.102                         |

**Table H.** Continued LDS.

| Stone | Fraction | LAB 1<br>Ni<br>µg/l | min<br>r<br>mg/m <sup>2</sup> | max<br>r<br>mg/m <sup>2</sup> | LAB 2<br>Ni<br>µg/l | min<br>r<br>mg/m <sup>2</sup> | max<br>r<br>mg/m <sup>2</sup> |
|-------|----------|---------------------|-------------------------------|-------------------------------|---------------------|-------------------------------|-------------------------------|
| 1     | 1        | 0.31                | 0.025                         | 0.025                         | 0.05                | 0.004                         | 0.004                         |
| 1     | 2        | 0.25                | 0.020                         | 0.020                         | 0.02                | 0.001                         | 0.001                         |
| 1     | 3        | 0.31                | 0.024                         | 0.024                         | 0.02                | 0.001                         | 0.001                         |
| 1     | 4        | 0.34                | 0.027                         | 0.027                         | 0.03                | 0.002                         | 0.002                         |
| 1     | 5        | 0.07                | 0.005                         | 0.005                         | 0.04                | 0.003                         | 0.003                         |
| 1     | 6        | 0.53                | 0.043                         | 0.043                         | 0.05                | 0.004                         | 0.004                         |
| 1     | 7        | 0.17                | 0.013                         | 0.013                         | 0.04                | 0.003                         | 0.003                         |
| 1     | 8        | 0.16                | 0.012                         | 0.012                         | 0.11                | 0.009                         | 0.009                         |
| 2     | 1        | 0.27                | 0.021                         | 0.021                         | 0.04                | 0.003                         | 0.003                         |
| 2     | 2        | 0.23                | 0.018                         | 0.018                         | 0.06                | 0.005                         | 0.005                         |
| 2     | 3        | 0.29                | 0.023                         | 0.023                         | 0.05                | 0.004                         | 0.004                         |
| 2     | 4        | 0.19                | 0.015                         | 0.015                         | 0.01                | 0.001                         | 0.001                         |
| 2     | 5        | 0.20                | 0.016                         | 0.016                         | 0.03                | 0.002                         | 0.002                         |
| 2     | 6        | 0.25                | 0.020                         | 0.020                         | 0.02                | 0.002                         | 0.002                         |
| 2     | 7        | 0.18                | 0.014                         | 0.014                         | 0.02                | 0.002                         | 0.002                         |
| 2     | 8        | 0.23                | 0.019                         | 0.019                         | 0.02                | 0.002                         | 0.002                         |
| 3     | 1        | 0.26                | 0.021                         | 0.021                         | 0.09                | 0.007                         | 0.007                         |
| 3     | 2        | 0.22                | 0.017                         | 0.017                         | 0.04                | 0.003                         | 0.003                         |
| 3     | 3        | 0.18                | 0.015                         | 0.015                         | 0.03                | 0.002                         | 0.002                         |
| 3     | 4        | 0.16                | 0.013                         | 0.013                         | 0.02                | 0.001                         | 0.001                         |
| 3     | 5        | 0.23                | 0.018                         | 0.018                         | 0.04                | 0.003                         | 0.003                         |
| 3     | 6        | 1.02                | 0.082                         | 0.082                         | 0.06                | 0.005                         | 0.005                         |
| 3     | 7        | 0.17                | 0.013                         | 0.013                         | 0.03                | 0.002                         | 0.002                         |
| 3     | 8        | 0.37                | 0.029                         | 0.029                         | 0.05                | 0.004                         | 0.004                         |
| 4     | 1        | 0.29                | 0.023                         | 0.023                         | 3.77                | 0.302                         | 0.302                         |
| 4     | 2        | 0.17                | 0.013                         | 0.013                         | 0.04                | 0.003                         | 0.003                         |
| 4     | 3        | 0.21                | 0.017                         | 0.017                         | 0.02                | 0.001                         | 0.001                         |
| 4     | 4        | 0.18                | 0.014                         | 0.014                         | 0.03                | 0.002                         | 0.002                         |
| 4     | 5        | 0.17                | 0.014                         | 0.014                         | 0.05                | 0.004                         | 0.004                         |
| 4     | 6        | 0.19                | 0.015                         | 0.015                         | 0.05                | 0.004                         | 0.004                         |
| 4     | 7        | 0.17                | 0.013                         | 0.013                         | 0.07                | 0.005                         | 0.005                         |
| 4     | 8        | 0.16                | 0.013                         | 0.013                         | 0.03                | 0.003                         | 0.003                         |
| 5     | 1        | 0.21                | 0.017                         | 0.017                         | 0.28                | 0.022                         | 0.022                         |
| 5     | 2        | 0.21                | 0.017                         | 0.017                         | 0.03                | 0.003                         | 0.003                         |
| 5     | 3        | 0.25                | 0.020                         | 0.020                         | 0.03                | 0.003                         | 0.003                         |
| 5     | 4        | 0.32                | 0.025                         | 0.025                         | 0.02                | 0.002                         | 0.002                         |
| 5     | 5        | 0.07                | 0.006                         | 0.006                         | 0.03                | 0.002                         | 0.002                         |
| 5     | 6        | 0.31                | 0.025                         | 0.025                         | 0.04                | 0.003                         | 0.003                         |
| 5     | 7        | 0.22                | 0.018                         | 0.018                         | 0.03                | 0.002                         | 0.002                         |
| 5     | 8        | 0.15                | 0.012                         | 0.012                         | 0.10                | 0.008                         | 0.008                         |
|       |          |                     | Σ Min                         | Σ Max                         |                     | Σ Min                         | Σ Max                         |
| 1     |          |                     | 0.171                         | 0.171                         |                     | 0.028                         | 0.028                         |
| 2     |          |                     | 0.146                         | 0.146                         |                     | 0.020                         | 0.020                         |
| 3     |          |                     | 0.208                         | 0.208                         |                     | 0.027                         | 0.027                         |
| 4     |          |                     | 0.122                         | 0.122                         |                     | 0.324                         | 0.324                         |
| 5     |          |                     | 0.140                         | 0.140                         |                     | 0.045                         | 0.045                         |
| Mean  |          |                     | 0.158                         | 0.158                         |                     | 0.089                         | 0.089                         |
| SD    |          |                     | 0.033                         | 0.033                         |                     | 0.132                         | 0.132                         |

**Table H.** Continued LDS.

| Stone | Fraction | LAB 1<br>Pb<br>µg/l | min<br>r<br>mg/m <sup>2</sup> | max<br>r<br>mg/m <sup>2</sup> | LAB 2<br>Pb<br>µg/l | min<br>r<br>mg/m <sup>2</sup> | max<br>r<br>mg/m <sup>2</sup> |
|-------|----------|---------------------|-------------------------------|-------------------------------|---------------------|-------------------------------|-------------------------------|
| 1     | 1        | 0.23                | 0.018                         | 0.018                         | <0.02               | 0.000                         | 0.002                         |
| 1     | 2        | 0.16                | 0.013                         | 0.013                         | <0.02               | 0.000                         | 0.002                         |
| 1     | 3        | 0.16                | 0.013                         | 0.013                         | <0.02               | 0.000                         | 0.002                         |
| 1     | 4        | 0.11                | 0.008                         | 0.008                         | <0.02               | 0.000                         | 0.002                         |
| 1     | 5        | 0.30                | 0.024                         | 0.024                         | <0.02               | 0.000                         | 0.002                         |
| 1     | 6        | 0.44                | 0.035                         | 0.035                         | <0.02               | 0.000                         | 0.002                         |
| 1     | 7        | <0.03               | 0.000                         | 0.002                         | <0.02               | 0.000                         | 0.002                         |
| 1     | 8        | 0.17                | 0.014                         | 0.014                         | <0.02               | 0.000                         | 0.002                         |
| 2     | 1        | 0.26                | 0.021                         | 0.021                         | <0.02               | 0.000                         | 0.002                         |
| 2     | 2        | 0.32                | 0.025                         | 0.025                         | <0.02               | 0.000                         | 0.002                         |
| 2     | 3        | 0.25                | 0.020                         | 0.020                         | 0.02                | 0.002                         | 0.002                         |
| 2     | 4        | 0.23                | 0.019                         | 0.019                         | <0.02               | 0.000                         | 0.002                         |
| 2     | 5        | 0.47                | 0.038                         | 0.038                         | <0.02               | 0.000                         | 0.002                         |
| 2     | 6        | 0.52                | 0.042                         | 0.042                         | <0.02               | 0.000                         | 0.002                         |
| 2     | 7        | 0.53                | 0.042                         | 0.042                         | <0.02               | 0.000                         | 0.002                         |
| 2     | 8        | 0.35                | 0.028                         | 0.028                         | <0.02               | 0.000                         | 0.002                         |
| 3     | 1        | 0.38                | 0.030                         | 0.030                         | <0.02               | 0.000                         | 0.002                         |
| 3     | 2        | 0.10                | 0.008                         | 0.008                         | <0.02               | 0.000                         | 0.002                         |
| 3     | 3        | 0.12                | 0.010                         | 0.010                         | <0.02               | 0.000                         | 0.002                         |
| 3     | 4        | 0.07                | 0.005                         | 0.005                         | <0.02               | 0.000                         | 0.002                         |
| 3     | 5        | 0.30                | 0.024                         | 0.024                         | <0.02               | 0.000                         | 0.002                         |
| 3     | 6        | 0.46                | 0.037                         | 0.037                         | <0.02               | 0.000                         | 0.002                         |
| 3     | 7        | 0.09                | 0.008                         | 0.008                         | <0.02               | 0.000                         | 0.002                         |
| 3     | 8        | 0.11                | 0.009                         | 0.009                         | <0.02               | 0.000                         | 0.002                         |
| 4     | 1        | 0.83                | 0.066                         | 0.066                         | 0.03                | 0.003                         | 0.003                         |
| 4     | 2        | 0.17                | 0.013                         | 0.013                         | <0.02               | 0.000                         | 0.002                         |
| 4     | 3        | 0.10                | 0.008                         | 0.008                         | <0.02               | 0.000                         | 0.002                         |
| 4     | 4        | 0.10                | 0.008                         | 0.008                         | <0.02               | 0.000                         | 0.002                         |
| 4     | 5        | 0.06                | 0.005                         | 0.005                         | <0.02               | 0.000                         | 0.002                         |
| 4     | 6        | <0.03               | 0.000                         | 0.002                         | <0.02               | 0.000                         | 0.002                         |
| 4     | 7        | 0.04                | 0.003                         | 0.003                         | <0.02               | 0.000                         | 0.002                         |
| 4     | 8        | <0.03               | 0.000                         | 0.002                         | <0.02               | 0.000                         | 0.002                         |
| 5     | 1        | 0.39                | 0.032                         | 0.032                         | <0.02               | 0.000                         | 0.002                         |
| 5     | 2        | 0.31                | 0.025                         | 0.025                         | <0.02               | 0.000                         | 0.002                         |
| 5     | 3        | 0.30                | 0.024                         | 0.024                         | <0.02               | 0.000                         | 0.002                         |
| 5     | 4        | 0.14                | 0.011                         | 0.011                         | <0.02               | 0.000                         | 0.002                         |
| 5     | 5        | 0.15                | 0.012                         | 0.012                         | <0.02               | 0.000                         | 0.002                         |
| 5     | 6        | 0.03                | 0.003                         | 0.003                         | <0.02               | 0.000                         | 0.002                         |
| 5     | 7        | <0.03               | 0.000                         | 0.002                         | <0.02               | 0.000                         | 0.002                         |
| 5     | 8        | <0.03               | 0.000                         | 0.002                         | <0.02               | 0.000                         | 0.002                         |
|       |          |                     | Σ Min                         | Σ Max                         |                     | Σ Min                         | Σ Max                         |
| 1     |          |                     | 0.126                         | 0.129                         |                     | 0.000                         | 0.013                         |
| 2     |          |                     | 0.235                         | 0.235                         |                     | 0.002                         | 0.013                         |
| 3     |          |                     | 0.130                         | 0.130                         |                     | 0.000                         | 0.013                         |
| 4     |          |                     | 0.104                         | 0.109                         |                     | 0.003                         | 0.014                         |
| 5     |          |                     | 0.106                         | 0.110                         |                     | 0.000                         | 0.013                         |
| Mean  |          |                     | 0.140                         | 0.143                         |                     | 0.001                         | 0.013                         |
| SD    |          |                     | 0.054                         | 0.053                         |                     | 0.001                         | 0.000                         |

**Table H.** Continued LDS.

| Stone | Fraction | LAB 1<br>Sb<br>µg/l | min<br>r<br>mg/m <sup>2</sup> | max<br>r<br>mg/m <sup>2</sup> | LAB 2<br>Sb<br>µg/l | min<br>r<br>mg/m <sup>2</sup> | max<br>r<br>mg/m <sup>2</sup> |
|-------|----------|---------------------|-------------------------------|-------------------------------|---------------------|-------------------------------|-------------------------------|
| 1     | 1        | 0.08                | 0.006                         | 0.006                         | <0.54               | 0.000                         | 0.043                         |
| 1     | 2        | 0.07                | 0.006                         | 0.006                         | <0.54               | 0.000                         | 0.043                         |
| 1     | 3        | 0.07                | 0.006                         | 0.006                         | <0.54               | 0.000                         | 0.043                         |
| 1     | 4        | 0.09                | 0.007                         | 0.007                         | <0.54               | 0.000                         | 0.043                         |
| 1     | 5        | <0.06               | 0.000                         | 0.005                         | <0.54               | 0.000                         | 0.043                         |
| 1     | 6        | 0.07                | 0.006                         | 0.006                         | <0.54               | 0.000                         | 0.043                         |
| 1     | 7        | 0.32                | 0.025                         | 0.025                         | <0.54               | 0.000                         | 0.043                         |
| 1     | 8        | 0.18                | 0.014                         | 0.014                         | <0.54               | 0.000                         | 0.043                         |
| 2     | 1        | 0.07                | 0.005                         | 0.005                         | <0.54               | 0.000                         | 0.043                         |
| 2     | 2        | 0.07                | 0.005                         | 0.005                         | <0.54               | 0.000                         | 0.043                         |
| 2     | 3        | 0.08                | 0.006                         | 0.006                         | <0.54               | 0.000                         | 0.043                         |
| 2     | 4        | <0.06               | 0.000                         | 0.005                         | <0.54               | 0.000                         | 0.043                         |
| 2     | 5        | 0.08                | 0.006                         | 0.006                         | <0.54               | 0.000                         | 0.043                         |
| 2     | 6        | 0.28                | 0.022                         | 0.022                         | <0.54               | 0.000                         | 0.043                         |
| 2     | 7        | 0.15                | 0.012                         | 0.012                         | <0.54               | 0.000                         | 0.043                         |
| 2     | 8        | 0.19                | 0.015                         | 0.015                         | <0.54               | 0.000                         | 0.043                         |
| 3     | 1        | 0.07                | 0.006                         | 0.006                         | <0.54               | 0.000                         | 0.043                         |
| 3     | 2        | <0.06               | 0.000                         | 0.005                         | <0.54               | 0.000                         | 0.043                         |
| 3     | 3        | <0.06               | 0.000                         | 0.005                         | <0.54               | 0.000                         | 0.043                         |
| 3     | 4        | 0.07                | 0.006                         | 0.006                         | <0.54               | 0.000                         | 0.043                         |
| 3     | 5        | <0.06               | 0.000                         | 0.005                         | <0.54               | 0.000                         | 0.043                         |
| 3     | 6        | 0.08                | 0.006                         | 0.006                         | <0.54               | 0.000                         | 0.043                         |
| 3     | 7        | 0.29                | 0.023                         | 0.023                         | <0.54               | 0.000                         | 0.043                         |
| 3     | 8        | 0.16                | 0.013                         | 0.013                         | <0.54               | 0.000                         | 0.043                         |
| 4     | 1        | 0.07                | 0.006                         | 0.006                         | <0.54               | 0.000                         | 0.043                         |
| 4     | 2        | 0.08                | 0.006                         | 0.006                         | <0.54               | 0.000                         | 0.043                         |
| 4     | 3        | 0.07                | 0.006                         | 0.006                         | <0.54               | 0.000                         | 0.043                         |
| 4     | 4        | 0.08                | 0.006                         | 0.006                         | <0.54               | 0.000                         | 0.043                         |
| 4     | 5        | 0.08                | 0.006                         | 0.006                         | <0.54               | 0.000                         | 0.043                         |
| 4     | 6        | 0.31                | 0.025                         | 0.025                         | <0.54               | 0.000                         | 0.043                         |
| 4     | 7        | 0.30                | 0.024                         | 0.024                         | <0.54               | 0.000                         | 0.043                         |
| 4     | 8        | 0.20                | 0.016                         | 0.016                         | <0.54               | 0.000                         | 0.043                         |
| 5     | 1        | 0.07                | 0.005                         | 0.005                         | <0.54               | 0.000                         | 0.043                         |
| 5     | 2        | <0.06               | 0.000                         | 0.005                         | <0.54               | 0.000                         | 0.043                         |
| 5     | 3        | 0.08                | 0.006                         | 0.006                         | <0.54               | 0.000                         | 0.043                         |
| 5     | 4        | 0.09                | 0.008                         | 0.008                         | <0.54               | 0.000                         | 0.043                         |
| 5     | 5        | <0.06               | 0.000                         | 0.005                         | <0.54               | 0.000                         | 0.043                         |
| 5     | 6        | 0.31                | 0.025                         | 0.025                         | <0.54               | 0.000                         | 0.043                         |
| 5     | 7        | 0.28                | 0.023                         | 0.023                         | <0.54               | 0.000                         | 0.043                         |
| 5     | 8        | 0.22                | 0.017                         | 0.017                         | <0.54               | 0.000                         | 0.043                         |
|       |          |                     | Σ Min                         | Σ Max                         |                     | Σ Min                         | Σ Max                         |
| 1     |          |                     | 0.070                         | 0.075                         |                     | 0.000                         | 0.346                         |
| 2     |          |                     | 0.073                         | 0.078                         |                     | 0.000                         | 0.345                         |
| 3     |          |                     | 0.054                         | 0.068                         |                     | 0.000                         | 0.346                         |
| 4     |          |                     | 0.095                         | 0.095                         |                     | 0.000                         | 0.346                         |
| 5     |          |                     | 0.084                         | 0.093                         |                     | 0.000                         | 0.346                         |
| Mean  |          |                     | 0.075                         | 0.082                         |                     | 0.000                         | 0.346                         |
| SD    |          |                     | 0.015                         | 0.012                         |                     | 0.000                         | 0.000                         |

**Table H.** Continued LDS.

| Stone | Fraction | LAB 1<br>Se<br>µg/l | min<br>r<br>mg/m <sup>2</sup> | max<br>r<br>mg/m <sup>2</sup> | LAB 2<br>Se<br>µg/l | min<br>r<br>mg/m <sup>2</sup> | max<br>r<br>mg/m <sup>2</sup> |
|-------|----------|---------------------|-------------------------------|-------------------------------|---------------------|-------------------------------|-------------------------------|
| 1     | 1        | 0.05                | 0.004                         | 0.004                         | <1.98               | 0.000                         | 0.158                         |
| 1     | 2        | 0.05                | 0.004                         | 0.004                         | <1.98               | 0.000                         | 0.158                         |
| 1     | 3        | 0.04                | 0.003                         | 0.003                         | <1.98               | 0.000                         | 0.158                         |
| 1     | 4        | <0.04               | 0.000                         | 0.003                         | <1.98               | 0.000                         | 0.158                         |
| 1     | 5        | 0.05                | 0.004                         | 0.004                         | <1.98               | 0.000                         | 0.158                         |
| 1     | 6        | 0.04                | 0.003                         | 0.003                         | <1.98               | 0.000                         | 0.158                         |
| 1     | 7        | 0.08                | 0.007                         | 0.007                         | <1.98               | 0.000                         | 0.158                         |
| 1     | 8        | 0.07                | 0.005                         | 0.005                         | <1.98               | 0.000                         | 0.158                         |
| 2     | 1        | 0.08                | 0.007                         | 0.007                         | <1.98               | 0.000                         | 0.158                         |
| 2     | 2        | 0.07                | 0.005                         | 0.005                         | <1.98               | 0.000                         | 0.158                         |
| 2     | 3        | 0.07                | 0.005                         | 0.005                         | <1.98               | 0.000                         | 0.158                         |
| 2     | 4        | 0.06                | 0.005                         | 0.005                         | <1.98               | 0.000                         | 0.158                         |
| 2     | 5        | 0.11                | 0.009                         | 0.009                         | <1.98               | 0.000                         | 0.158                         |
| 2     | 6        | 0.08                | 0.007                         | 0.007                         | <1.98               | 0.000                         | 0.158                         |
| 2     | 7        | 0.11                | 0.009                         | 0.009                         | <1.98               | 0.000                         | 0.158                         |
| 2     | 8        | 0.08                | 0.007                         | 0.007                         | <1.98               | 0.000                         | 0.158                         |
| 3     | 1        | 0.08                | 0.006                         | 0.006                         | <1.98               | 0.000                         | 0.158                         |
| 3     | 2        | 0.08                | 0.006                         | 0.006                         | <1.98               | 0.000                         | 0.158                         |
| 3     | 3        | 0.07                | 0.006                         | 0.006                         | <1.98               | 0.000                         | 0.158                         |
| 3     | 4        | 0.06                | 0.005                         | 0.005                         | <1.98               | 0.000                         | 0.158                         |
| 3     | 5        | 0.09                | 0.007                         | 0.007                         | <1.98               | 0.000                         | 0.158                         |
| 3     | 6        | 0.14                | 0.012                         | 0.012                         | <1.98               | 0.000                         | 0.158                         |
| 3     | 7        | 0.19                | 0.015                         | 0.015                         | <1.98               | 0.000                         | 0.158                         |
| 3     | 8        | 0.15                | 0.012                         | 0.012                         | <1.98               | 0.000                         | 0.158                         |
| 4     | 1        | 0.06                | 0.005                         | 0.005                         | <1.98               | 0.000                         | 0.158                         |
| 4     | 2        | 0.05                | 0.004                         | 0.004                         | <1.98               | 0.000                         | 0.158                         |
| 4     | 3        | 0.05                | 0.004                         | 0.004                         | <1.98               | 0.000                         | 0.158                         |
| 4     | 4        | <0.04               | 0.000                         | 0.003                         | <1.98               | 0.000                         | 0.158                         |
| 4     | 5        | 0.07                | 0.006                         | 0.006                         | <1.98               | 0.000                         | 0.158                         |
| 4     | 6        | 0.06                | 0.004                         | 0.004                         | <1.98               | 0.000                         | 0.158                         |
| 4     | 7        | 0.10                | 0.008                         | 0.008                         | <1.98               | 0.000                         | 0.158                         |
| 4     | 8        | 0.06                | 0.005                         | 0.005                         | <1.98               | 0.000                         | 0.158                         |
| 5     | 1        | 0.07                | 0.005                         | 0.005                         | <1.98               | 0.000                         | 0.158                         |
| 5     | 2        | 0.05                | 0.004                         | 0.004                         | <1.98               | 0.000                         | 0.158                         |
| 5     | 3        | 0.05                | 0.004                         | 0.004                         | <1.98               | 0.000                         | 0.158                         |
| 5     | 4        | 0.05                | 0.004                         | 0.004                         | <1.98               | 0.000                         | 0.158                         |
| 5     | 5        | 0.08                | 0.006                         | 0.006                         | <1.98               | 0.000                         | 0.158                         |
| 5     | 6        | 0.07                | 0.006                         | 0.006                         | <1.98               | 0.000                         | 0.158                         |
| 5     | 7        | 0.10                | 0.008                         | 0.008                         | <1.98               | 0.000                         | 0.158                         |
| 5     | 8        | 0.08                | 0.006                         | 0.006                         | <1.98               | 0.000                         | 0.158                         |
|       |          |                     | Σ Min                         | Σ Max                         |                     | Σ Min                         | Σ Max                         |
| 1     |          |                     | 0.030                         | 0.033                         |                     | 0.000                         | 1.267                         |
| 2     |          |                     | 0.053                         | 0.053                         |                     | 0.000                         | 1.267                         |
| 3     |          |                     | 0.069                         | 0.069                         |                     | 0.000                         | 1.268                         |
| 4     |          |                     | 0.036                         | 0.039                         |                     | 0.000                         | 1.267                         |
| 5     |          |                     | 0.043                         | 0.043                         |                     | 0.000                         | 1.267                         |
| Mean  |          |                     | 0.046                         | 0.047                         |                     | 0.000                         | 1.267                         |
| SD    |          |                     | 0.015                         | 0.014                         |                     | 0.000                         | 0.000                         |

**Table H.** Continued LDS.

| Stone | Fraction | LAB 1<br>Sn<br>µg/l | min<br>r<br>mg/m <sup>2</sup> | max<br>r<br>mg/m <sup>2</sup> | LAB 2<br>Sn<br>µg/l | min<br>r<br>mg/m <sup>2</sup> | max<br>r<br>mg/m <sup>2</sup> |
|-------|----------|---------------------|-------------------------------|-------------------------------|---------------------|-------------------------------|-------------------------------|
| 1     | 1        | 0.12                | 0.010                         | 0.010                         | <0.10               | 0.000                         | 0.008                         |
| 1     | 2        | 0.09                | 0.008                         | 0.008                         | <0.10               | 0.000                         | 0.008                         |
| 1     | 3        | 0.08                | 0.006                         | 0.006                         | <0.10               | 0.000                         | 0.008                         |
| 1     | 4        | 0.06                | 0.005                         | 0.005                         | <0.10               | 0.000                         | 0.008                         |
| 1     | 5        | 0.08                | 0.007                         | 0.007                         | <0.10               | 0.000                         | 0.008                         |
| 1     | 6        | 0.06                | 0.004                         | 0.004                         | <0.10               | 0.000                         | 0.008                         |
| 1     | 7        | 0.11                | 0.008                         | 0.008                         | <0.10               | 0.000                         | 0.008                         |
| 1     | 8        | 0.12                | 0.009                         | 0.009                         | <0.10               | 0.000                         | 0.008                         |
| 2     | 1        | 0.18                | 0.014                         | 0.014                         | <0.10               | 0.000                         | 0.008                         |
| 2     | 2        | 0.13                | 0.010                         | 0.010                         | <0.10               | 0.000                         | 0.008                         |
| 2     | 3        | 0.10                | 0.008                         | 0.008                         | <0.10               | 0.000                         | 0.008                         |
| 2     | 4        | 0.08                | 0.007                         | 0.007                         | <0.10               | 0.000                         | 0.008                         |
| 2     | 5        | 0.06                | 0.005                         | 0.005                         | <0.10               | 0.000                         | 0.008                         |
| 2     | 6        | 0.06                | 0.004                         | 0.004                         | <0.10               | 0.000                         | 0.008                         |
| 2     | 7        | 0.10                | 0.008                         | 0.008                         | <0.10               | 0.000                         | 0.008                         |
| 2     | 8        | 0.05                | 0.004                         | 0.004                         | <0.10               | 0.000                         | 0.008                         |
| 3     | 1        | 0.23                | 0.019                         | 0.019                         | <0.10               | 0.000                         | 0.008                         |
| 3     | 2        | 0.16                | 0.013                         | 0.013                         | <0.10               | 0.000                         | 0.008                         |
| 3     | 3        | 0.15                | 0.012                         | 0.012                         | <0.10               | 0.000                         | 0.008                         |
| 3     | 4        | 0.10                | 0.008                         | 0.008                         | <0.10               | 0.000                         | 0.008                         |
| 3     | 5        | 0.15                | 0.012                         | 0.012                         | <0.10               | 0.000                         | 0.008                         |
| 3     | 6        | 0.05                | 0.004                         | 0.004                         | <0.10               | 0.000                         | 0.008                         |
| 3     | 7        | 0.14                | 0.011                         | 0.011                         | <0.10               | 0.000                         | 0.008                         |
| 3     | 8        | 0.06                | 0.005                         | 0.005                         | <0.10               | 0.000                         | 0.008                         |
| 4     | 1        | 0.31                | 0.025                         | 0.025                         | <0.10               | 0.000                         | 0.008                         |
| 4     | 2        | 0.22                | 0.018                         | 0.018                         | <0.10               | 0.000                         | 0.008                         |
| 4     | 3        | 0.22                | 0.017                         | 0.017                         | <0.10               | 0.000                         | 0.008                         |
| 4     | 4        | 0.10                | 0.008                         | 0.008                         | <0.10               | 0.000                         | 0.008                         |
| 4     | 5        | 0.07                | 0.006                         | 0.006                         | <0.10               | 0.000                         | 0.008                         |
| 4     | 6        | 0.05                | 0.004                         | 0.004                         | <0.10               | 0.000                         | 0.008                         |
| 4     | 7        | 0.20                | 0.016                         | 0.016                         | <0.10               | 0.000                         | 0.008                         |
| 4     | 8        | 0.10                | 0.008                         | 0.008                         | <0.10               | 0.000                         | 0.008                         |
| 5     | 1        | 0.20                | 0.016                         | 0.016                         | <0.10               | 0.000                         | 0.008                         |
| 5     | 2        | 0.14                | 0.011                         | 0.011                         | <0.10               | 0.000                         | 0.008                         |
| 5     | 3        | 0.13                | 0.010                         | 0.010                         | <0.10               | 0.000                         | 0.008                         |
| 5     | 4        | 0.11                | 0.008                         | 0.008                         | <0.10               | 0.000                         | 0.008                         |
| 5     | 5        | 0.06                | 0.005                         | 0.005                         | <0.10               | 0.000                         | 0.008                         |
| 5     | 6        | 0.05                | 0.004                         | 0.004                         | <0.10               | 0.000                         | 0.008                         |
| 5     | 7        | 0.14                | 0.011                         | 0.011                         | <0.10               | 0.000                         | 0.008                         |
| 5     | 8        | 0.05                | 0.004                         | 0.004                         | <0.10               | 0.000                         | 0.008                         |
|       |          |                     | Σ Min                         | Σ Max                         |                     | Σ Min                         | Σ Max                         |
| 1     |          |                     | 0.058                         | 0.058                         |                     | 0.000                         | 0.064                         |
| 2     |          |                     | 0.060                         | 0.060                         |                     | 0.000                         | 0.064                         |
| 3     |          |                     | 0.084                         | 0.084                         |                     | 0.000                         | 0.064                         |
| 4     |          |                     | 0.102                         | 0.102                         |                     | 0.000                         | 0.064                         |
| 5     |          |                     | 0.070                         | 0.070                         |                     | 0.000                         | 0.064                         |
| Mean  |          |                     | 0.075                         | 0.075                         |                     | 0.000                         | 0.064                         |
| SD    |          |                     | 0.018                         | 0.018                         |                     | 0.000                         | 0.000                         |

**Table H.** Continued LDS.

| Stone | Fraction | LAB 1<br>Sr<br>µg/l | min<br>r<br>mg/m <sup>2</sup> | max<br>r<br>mg/m <sup>2</sup> | LAB 2<br>Sr<br>µg/l | min<br>r<br>mg/m <sup>2</sup> | max<br>r<br>mg/m <sup>2</sup> |
|-------|----------|---------------------|-------------------------------|-------------------------------|---------------------|-------------------------------|-------------------------------|
| 1     | 1        | 9.25                | 0.74                          | 0.74                          | 3.45                | 0.28                          | 0.28                          |
| 1     | 2        | 10.64               | 0.85                          | 0.85                          | 5.44                | 0.44                          | 0.44                          |
| 1     | 3        | 12.28               | 0.98                          | 0.98                          | 6.57                | 0.53                          | 0.53                          |
| 1     | 4        | 14.32               | 1.15                          | 1.15                          | 8.38                | 0.67                          | 0.67                          |
| 1     | 5        | 19.19               | 1.54                          | 1.54                          | 14.69               | 1.18                          | 1.18                          |
| 1     | 6        | 31.25               | 2.50                          | 2.50                          | 19.14               | 1.53                          | 1.53                          |
| 1     | 7        | 86.17               | 6.89                          | 6.89                          | 30.57               | 2.45                          | 2.45                          |
| 1     | 8        | 173.20              | 13.85                         | 13.85                         | 33.78               | 2.70                          | 2.70                          |
| 2     | 1        | 7.55                | 0.60                          | 0.60                          | 3.38                | 0.27                          | 0.27                          |
| 2     | 2        | 9.34                | 0.75                          | 0.75                          | 6.30                | 0.50                          | 0.50                          |
| 2     | 3        | 10.63               | 0.85                          | 0.85                          | 7.89                | 0.63                          | 0.63                          |
| 2     | 4        | 8.32                | 0.67                          | 0.67                          | 9.97                | 0.80                          | 0.80                          |
| 2     | 5        | 16.45               | 1.32                          | 1.32                          | 20.71               | 1.66                          | 1.66                          |
| 2     | 6        | 18.94               | 1.52                          | 1.52                          | 29.10               | 2.33                          | 2.33                          |
| 2     | 7        | 19.68               | 1.57                          | 1.57                          | 48.77               | 3.90                          | 3.90                          |
| 2     | 8        | 22.96               | 1.84                          | 1.84                          | 59.47               | 4.76                          | 4.76                          |
| 3     | 1        | 8.85                | 0.71                          | 0.71                          | 3.45                | 0.28                          | 0.28                          |
| 3     | 2        | 5.25                | 0.42                          | 0.42                          | 6.74                | 0.54                          | 0.54                          |
| 3     | 3        | 6.65                | 0.53                          | 0.53                          | 8.85                | 0.71                          | 0.71                          |
| 3     | 4        | 8.30                | 0.66                          | 0.66                          | 13.41               | 1.07                          | 1.07                          |
| 3     | 5        | 14.72               | 1.18                          | 1.18                          | 28.38               | 2.27                          | 2.27                          |
| 3     | 6        | 18.12               | 1.45                          | 1.45                          | 36.22               | 2.90                          | 2.90                          |
| 3     | 7        | 22.06               | 1.77                          | 1.77                          | 56.10               | 4.49                          | 4.49                          |
| 3     | 8        | 21.99               | 1.76                          | 1.76                          | 60.17               | 4.82                          | 4.82                          |
| 4     | 1        | 14.28               | 1.14                          | 1.14                          | 4.96                | 0.40                          | 0.40                          |
| 4     | 2        | 22.99               | 1.84                          | 1.84                          | 6.03                | 0.48                          | 0.48                          |
| 4     | 3        | 26.79               | 2.14                          | 2.14                          | 7.77                | 0.62                          | 0.62                          |
| 4     | 4        | 26.10               | 2.09                          | 2.09                          | 9.94                | 0.80                          | 0.80                          |
| 4     | 5        | 44.02               | 3.52                          | 3.52                          | 19.05               | 1.52                          | 1.52                          |
| 4     | 6        | 53.37               | 4.27                          | 4.27                          | 21.65               | 1.73                          | 1.73                          |
| 4     | 7        | 81.15               | 6.49                          | 6.49                          | 34.57               | 2.77                          | 2.77                          |
| 4     | 8        | 86.84               | 6.95                          | 6.95                          | 35.98               | 2.88                          | 2.88                          |
| 5     | 1        | 8.78                | 0.70                          | 0.70                          | 3.72                | 0.30                          | 0.30                          |
| 5     | 2        | 18.93               | 1.51                          | 1.51                          | 6.45                | 0.52                          | 0.52                          |
| 5     | 3        | 24.71               | 1.98                          | 1.98                          | 8.12                | 0.65                          | 0.65                          |
| 5     | 4        | 28.19               | 2.26                          | 2.26                          | 11.58               | 0.93                          | 0.93                          |
| 5     | 5        | 35.50               | 2.84                          | 2.84                          | 20.47               | 1.64                          | 1.64                          |
| 5     | 6        | 48.55               | 3.88                          | 3.88                          | 26.58               | 2.13                          | 2.13                          |
| 5     | 7        | 61.95               | 4.96                          | 4.96                          | 45.72               | 3.66                          | 3.66                          |
| 5     | 8        | 40.02               | 3.20                          | 3.20                          | 53.61               | 4.29                          | 4.29                          |
|       |          |                     | Σ Min                         | Σ Max                         |                     | Σ Min                         | Σ Max                         |
| 1     |          |                     | 28.50                         | 28.50                         |                     | 9.76                          | 9.76                          |
| 2     |          |                     | 9.11                          | 9.11                          |                     | 14.84                         | 14.84                         |
| 3     |          |                     | 8.48                          | 8.48                          |                     | 17.07                         | 17.07                         |
| 4     |          |                     | 28.44                         | 28.44                         |                     | 11.20                         | 11.20                         |
| 5     |          |                     | 21.33                         | 21.33                         |                     | 14.10                         | 14.10                         |
| Mean  |          |                     | 19.17                         | 19.17                         |                     | 13.39                         | 13.39                         |
| SD    |          |                     | 9.92                          | 9.92                          |                     | 2.92                          | 2.92                          |

**Table H.** Continued LDS.

| Stone | Fraction | LAB 1<br>U<br>µg/l | min<br>r<br>mg/m <sup>2</sup> | max<br>r<br>mg/m <sup>2</sup> | LAB 2<br>U<br>µg/l | min<br>r<br>mg/m <sup>2</sup> | max<br>r<br>mg/m <sup>2</sup> |
|-------|----------|--------------------|-------------------------------|-------------------------------|--------------------|-------------------------------|-------------------------------|
| 1     | 1        | <0.04              | 0.000                         | 0.003                         | <0.02              | 0.000                         | 0.002                         |
| 1     | 2        | <0.04              | 0.000                         | 0.003                         | <0.02              | 0.000                         | 0.002                         |
| 1     | 3        | <0.04              | 0.000                         | 0.003                         | <0.02              | 0.000                         | 0.002                         |
| 1     | 4        | <0.04              | 0.000                         | 0.003                         | <0.02              | 0.000                         | 0.002                         |
| 1     | 5        | <0.04              | 0.000                         | 0.003                         | <0.02              | 0.000                         | 0.002                         |
| 1     | 6        | <0.04              | 0.000                         | 0.003                         | <0.02              | 0.000                         | 0.002                         |
| 1     | 7        | <0.04              | 0.000                         | 0.003                         | <0.02              | 0.000                         | 0.002                         |
| 1     | 8        | <0.04              | 0.000                         | 0.003                         | <0.02              | 0.000                         | 0.002                         |
| 2     | 1        | <0.04              | 0.000                         | 0.003                         | <0.02              | 0.000                         | 0.002                         |
| 2     | 2        | <0.04              | 0.000                         | 0.003                         | <0.02              | 0.000                         | 0.002                         |
| 2     | 3        | <0.04              | 0.000                         | 0.003                         | <0.02              | 0.000                         | 0.002                         |
| 2     | 4        | <0.04              | 0.000                         | 0.003                         | <0.02              | 0.000                         | 0.002                         |
| 2     | 5        | <0.04              | 0.000                         | 0.003                         | <0.02              | 0.000                         | 0.002                         |
| 2     | 6        | <0.04              | 0.000                         | 0.003                         | <0.02              | 0.000                         | 0.002                         |
| 2     | 7        | <0.04              | 0.000                         | 0.003                         | <0.02              | 0.000                         | 0.002                         |
| 2     | 8        | <0.04              | 0.000                         | 0.003                         | <0.02              | 0.000                         | 0.002                         |
| 3     | 1        | <0.04              | 0.000                         | 0.003                         | <0.02              | 0.000                         | 0.002                         |
| 3     | 2        | <0.04              | 0.000                         | 0.003                         | <0.02              | 0.000                         | 0.002                         |
| 3     | 3        | <0.04              | 0.000                         | 0.003                         | <0.02              | 0.000                         | 0.002                         |
| 3     | 4        | <0.04              | 0.000                         | 0.003                         | <0.02              | 0.000                         | 0.002                         |
| 3     | 5        | <0.04              | 0.000                         | 0.003                         | <0.02              | 0.000                         | 0.002                         |
| 3     | 6        | <0.04              | 0.000                         | 0.003                         | <0.02              | 0.000                         | 0.002                         |
| 3     | 7        | <0.04              | 0.000                         | 0.003                         | <0.02              | 0.000                         | 0.002                         |
| 3     | 8        | <0.04              | 0.000                         | 0.003                         | <0.02              | 0.000                         | 0.002                         |
| 4     | 1        | <0.04              | 0.000                         | 0.003                         | <0.02              | 0.000                         | 0.002                         |
| 4     | 2        | <0.04              | 0.000                         | 0.003                         | <0.02              | 0.000                         | 0.002                         |
| 4     | 3        | <0.04              | 0.000                         | 0.003                         | <0.02              | 0.000                         | 0.002                         |
| 4     | 4        | <0.04              | 0.000                         | 0.003                         | <0.02              | 0.000                         | 0.002                         |
| 4     | 5        | <0.04              | 0.000                         | 0.003                         | <0.02              | 0.000                         | 0.002                         |
| 4     | 6        | <0.04              | 0.000                         | 0.003                         | <0.02              | 0.000                         | 0.002                         |
| 4     | 7        | <0.04              | 0.000                         | 0.003                         | <0.02              | 0.000                         | 0.002                         |
| 4     | 8        | <0.04              | 0.000                         | 0.003                         | <0.02              | 0.000                         | 0.002                         |
| 5     | 1        | <0.04              | 0.000                         | 0.003                         | <0.02              | 0.000                         | 0.002                         |
| 5     | 2        | <0.04              | 0.000                         | 0.003                         | <0.02              | 0.000                         | 0.002                         |
| 5     | 3        | <0.04              | 0.000                         | 0.003                         | <0.02              | 0.000                         | 0.002                         |
| 5     | 4        | <0.04              | 0.000                         | 0.003                         | <0.02              | 0.000                         | 0.002                         |
| 5     | 5        | <0.04              | 0.000                         | 0.003                         | <0.02              | 0.000                         | 0.002                         |
| 5     | 6        | <0.04              | 0.000                         | 0.003                         | <0.02              | 0.000                         | 0.002                         |
| 5     | 7        | <0.04              | 0.000                         | 0.003                         | <0.02              | 0.000                         | 0.002                         |
| 5     | 8        | <0.04              | 0.000                         | 0.003                         | <0.02              | 0.000                         | 0.002                         |
|       |          |                    | Σ Min                         | Σ Max                         |                    | Σ Min                         | Σ Max                         |
| 1     |          |                    | 0.000                         | 0.026                         |                    | 0.000                         | 0.013                         |
| 2     |          |                    | 0.000                         | 0.026                         |                    | 0.000                         | 0.013                         |
| 3     |          |                    | 0.000                         | 0.026                         |                    | 0.000                         | 0.013                         |
| 4     |          |                    | 0.000                         | 0.026                         |                    | 0.000                         | 0.013                         |
| 5     |          |                    | 0.000                         | 0.026                         |                    | 0.000                         | 0.013                         |
| Mean  |          |                    | 0.000                         | 0.026                         |                    | 0.000                         | 0.013                         |
| SD    |          |                    | 0.000                         | 0.000                         |                    | 0.000                         | 0.000                         |

**Table H.** Continued LDS.

| Stone | Fraction | LAB 1<br>V<br>µg/l | min<br>r<br>mg/m <sup>2</sup> | max<br>r<br>mg/m <sup>2</sup> | LAB 2<br>V<br>µg/l | min<br>r<br>mg/m <sup>2</sup> | max<br>r<br>mg/m <sup>2</sup> |
|-------|----------|--------------------|-------------------------------|-------------------------------|--------------------|-------------------------------|-------------------------------|
| 1     | 1        | 15.2               | 1.21                          | 1.21                          | 14.9               | 1.19                          | 1.19                          |
| 1     | 2        | 20.8               | 1.67                          | 1.67                          | 36.2               | 2.90                          | 2.90                          |
| 1     | 3        | 27.8               | 2.23                          | 2.23                          | 41.0               | 3.28                          | 3.28                          |
| 1     | 4        | 34.8               | 2.78                          | 2.78                          | 53.8               | 4.30                          | 4.30                          |
| 1     | 5        | 78.7               | 6.30                          | 6.30                          | 100.3              | 8.03                          | 8.03                          |
| 1     | 6        | 97.7               | 7.81                          | 7.81                          | 111.6              | 8.93                          | 8.93                          |
| 1     | 7        | 33.1               | 2.65                          | 2.65                          | 167.2              | 13.38                         | 13.38                         |
| 1     | 8        | 1.47               | 0.12                          | 0.12                          | 141.8              | 11.35                         | 11.35                         |
| 2     | 1        | 13.4               | 1.07                          | 1.07                          | 15.1               | 1.21                          | 1.21                          |
| 2     | 2        | 27.3               | 2.18                          | 2.18                          | 30.4               | 2.43                          | 2.43                          |
| 2     | 3        | 37.5               | 3.00                          | 3.00                          | 32.8               | 2.62                          | 2.62                          |
| 2     | 4        | 46.1               | 3.69                          | 3.69                          | 38.2               | 3.06                          | 3.06                          |
| 2     | 5        | 99.0               | 7.92                          | 7.92                          | 68.8               | 5.50                          | 5.50                          |
| 2     | 6        | 110                | 8.81                          | 8.81                          | 77.2               | 6.17                          | 6.17                          |
| 2     | 7        | 191                | 15.31                         | 15.31                         | 110.0              | 8.79                          | 8.79                          |
| 2     | 8        | 138                | 11.08                         | 11.08                         | 102.1              | 8.17                          | 8.17                          |
| 3     | 1        | 4.51               | 0.36                          | 0.36                          | 24.2               | 1.94                          | 1.94                          |
| 3     | 2        | 5.01               | 0.40                          | 0.40                          | 49.7               | 3.97                          | 3.97                          |
| 3     | 3        | 5.23               | 0.42                          | 0.42                          | 57.8               | 4.63                          | 4.63                          |
| 3     | 4        | 5.77               | 0.46                          | 0.46                          | 77.2               | 6.18                          | 6.18                          |
| 3     | 5        | 8.67               | 0.69                          | 0.69                          | 150.5              | 12.05                         | 12.05                         |
| 3     | 6        | 12.85              | 1.03                          | 1.03                          | 167.7              | 13.42                         | 13.42                         |
| 3     | 7        | 15.49              | 1.24                          | 1.24                          | 241.5              | 19.33                         | 19.33                         |
| 3     | 8        | 11.66              | 0.93                          | 0.93                          | 220.4              | 17.64                         | 17.64                         |
| 4     | 1        | 101                | 8.08                          | 8.08                          | 20.1               | 1.61                          | 1.61                          |
| 4     | 2        | 172                | 13.74                         | 13.74                         | 36.8               | 2.94                          | 2.94                          |
| 4     | 3        | 201                | 16.10                         | 16.10                         | 39.2               | 3.14                          | 3.14                          |
| 4     | 4        | 160                | 12.78                         | 12.78                         | 44.7               | 3.58                          | 3.58                          |
| 4     | 5        | 285                | 22.78                         | 22.78                         | 82.5               | 6.60                          | 6.60                          |
| 4     | 6        | 438                | 35.03                         | 35.03                         | 78.1               | 6.25                          | 6.25                          |
| 4     | 7        | 499                | 39.94                         | 39.94                         | 114.4              | 9.15                          | 9.15                          |
| 4     | 8        | 519                | 41.51                         | 41.51                         | 101.5              | 8.13                          | 8.13                          |
| 5     | 1        | 49.0               | 3.92                          | 3.92                          | 14.4               | 1.16                          | 1.16                          |
| 5     | 2        | 79.0               | 6.32                          | 6.32                          | 29.6               | 2.37                          | 2.37                          |
| 5     | 3        | 90.5               | 7.24                          | 7.24                          | 31.4               | 2.51                          | 2.51                          |
| 5     | 4        | 98.0               | 7.84                          | 7.84                          | 39.4               | 3.15                          | 3.15                          |
| 5     | 5        | 176                | 14.08                         | 14.08                         | 72.6               | 5.81                          | 5.81                          |
| 5     | 6        | 204                | 16.33                         | 16.33                         | 74.9               | 5.99                          | 5.99                          |
| 5     | 7        | 257                | 20.57                         | 20.57                         | 123.3              | 9.86                          | 9.86                          |
| 5     | 8        | 256                | 20.46                         | 20.46                         | 121.4              | 9.71                          | 9.71                          |
|       |          |                    | Σ Min                         | Σ Max                         |                    | Σ Min                         | Σ Max                         |
| 1     |          |                    | 24.8                          | 24.8                          |                    | 53.36                         | 53.36                         |
| 2     |          |                    | 53.1                          | 53.1                          |                    | 37.96                         | 37.96                         |
| 3     |          |                    | 5.5                           | 5.5                           |                    | 79.15                         | 79.15                         |
| 4     |          |                    | 189.9                         | 189.9                         |                    | 41.40                         | 41.40                         |
| 5     |          |                    | 96.8                          | 96.8                          |                    | 40.56                         | 40.56                         |
| Mean  |          |                    | 74.0                          | 74.0                          |                    | 50.49                         | 50.49                         |
| SD    |          |                    | 73.3                          | 73.3                          |                    | 17.09                         | 17.09                         |

**Table H.** Continued LDS.

| Stone | Fraction | LAB 1<br>Zn<br>µg/l | min<br>r<br>mg/m <sup>2</sup> | max<br>r<br>mg/m <sup>2</sup> | LAB 2<br>Zn<br>µg/l | min<br>r<br>mg/m <sup>2</sup> | max<br>r<br>mg/m <sup>2</sup> |
|-------|----------|---------------------|-------------------------------|-------------------------------|---------------------|-------------------------------|-------------------------------|
| 1     | 1        | 227                 | 18                            | 18                            | 0.71                | 0.057                         | 0.057                         |
| 1     | 2        | 433                 | 35                            | 35                            | 0.33                | 0.026                         | 0.026                         |
| 1     | 3        | 437                 | 35                            | 35                            | 0.35                | 0.028                         | 0.028                         |
| 1     | 4        | 464                 | 37                            | 37                            | 0.59                | 0.047                         | 0.047                         |
| 1     | 5        | 27                  | 2                             | 2                             | 0.47                | 0.038                         | 0.038                         |
| 1     | 6        | 406                 | 32                            | 32                            | 0.42                | 0.033                         | 0.033                         |
| 1     | 7        | 340                 | 27                            | 27                            | 0.80                | 0.064                         | 0.064                         |
| 1     | 8        | 351                 | 28                            | 28                            | 0.45                | 0.036                         | 0.036                         |
| 2     | 1        | 283                 | 23                            | 23                            | 0.89                | 0.071                         | 0.071                         |
| 2     | 2        | 425                 | 34                            | 34                            | 0.35                | 0.028                         | 0.028                         |
| 2     | 3        | 271                 | 22                            | 22                            | 0.40                | 0.032                         | 0.032                         |
| 2     | 4        | 255                 | 20                            | 20                            | 0.35                | 0.028                         | 0.028                         |
| 2     | 5        | 249                 | 20                            | 20                            | 0.59                | 0.047                         | 0.047                         |
| 2     | 6        | 317                 | 25                            | 25                            | 0.45                | 0.036                         | 0.036                         |
| 2     | 7        | 100                 | 8                             | 8                             | 0.51                | 0.041                         | 0.041                         |
| 2     | 8        | 215                 | 17                            | 17                            | 0.66                | 0.053                         | 0.053                         |
| 3     | 1        | 415                 | 33                            | 33                            | 0.60                | 0.048                         | 0.048                         |
| 3     | 2        | 188                 | 15                            | 15                            | 0.54                | 0.043                         | 0.043                         |
| 3     | 3        | 234                 | 19                            | 19                            | 0.55                | 0.044                         | 0.044                         |
| 3     | 4        | 299                 | 24                            | 24                            | 0.38                | 0.030                         | 0.030                         |
| 3     | 5        | 307                 | 25                            | 25                            | 0.80                | 0.064                         | 0.064                         |
| 3     | 6        | 499                 | 40                            | 40                            | 0.93                | 0.074                         | 0.074                         |
| 3     | 7        | 272                 | 22                            | 22                            | 0.51                | 0.041                         | 0.041                         |
| 3     | 8        | 423                 | 34                            | 34                            | 0.60                | 0.048                         | 0.048                         |
| 4     | 1        | 418                 | 33                            | 33                            | 1.75                | 0.140                         | 0.140                         |
| 4     | 2        | 173                 | 14                            | 14                            | 0.30                | 0.024                         | 0.024                         |
| 4     | 3        | 321                 | 26                            | 26                            | 0.42                | 0.034                         | 0.034                         |
| 4     | 4        | 206                 | 16                            | 16                            | 0.66                | 0.053                         | 0.053                         |
| 4     | 5        | 349                 | 28                            | 28                            | 0.41                | 0.033                         | 0.033                         |
| 4     | 6        | 199                 | 16                            | 16                            | 0.38                | 0.030                         | 0.030                         |
| 4     | 7        | 202                 | 16                            | 16                            | 0.56                | 0.045                         | 0.045                         |
| 4     | 8        | 143                 | 11                            | 11                            | 0.63                | 0.051                         | 0.051                         |
| 5     | 1        | 178                 | 14                            | 14                            | 0.68                | 0.054                         | 0.054                         |
| 5     | 2        | 426                 | 34                            | 34                            | 0.30                | 0.024                         | 0.024                         |
| 5     | 3        | 189                 | 15                            | 15                            | 0.44                | 0.035                         | 0.035                         |
| 5     | 4        | 437                 | 35                            | 35                            | 0.35                | 0.028                         | 0.028                         |
| 5     | 5        | 28                  | 2                             | 2                             | 0.50                | 0.040                         | 0.040                         |
| 5     | 6        | 169                 | 14                            | 14                            | 0.46                | 0.037                         | 0.037                         |
| 5     | 7        | 196                 | 16                            | 16                            | 0.89                | 0.072                         | 0.072                         |
| 5     | 8        | 178                 | 14                            | 14                            | 0.61                | 0.049                         | 0.049                         |
|       |          |                     | Σ Min                         | Σ Max                         |                     | Σ Min                         | Σ Max                         |
| 1     |          |                     | 215                           | 215                           |                     | 0.330                         | 0.330                         |
| 2     |          |                     | 169                           | 169                           |                     | 0.336                         | 0.336                         |
| 3     |          |                     | 211                           | 211                           |                     | 0.393                         | 0.393                         |
| 4     |          |                     | 161                           | 161                           |                     | 0.410                         | 0.410                         |
| 5     |          |                     | 144                           | 144                           |                     | 0.339                         | 0.339                         |
| Mean  |          |                     | 180                           | 180                           |                     | 0.362                         | 0.362                         |
| SD    |          |                     | 31                            | 31                            |                     | 0.037                         | 0.037                         |

1 **Table I.** Conductivity and pH values of the DSLTs measured by LAB2.

|             |             | Karbon Quartzite |                         | Basalt |                         | Granodiorite |                         | Granite |                         | CUS1 |                         | CUS2 |                         | CUS3 |                         | LDS  |                         |
|-------------|-------------|------------------|-------------------------|--------|-------------------------|--------------|-------------------------|---------|-------------------------|------|-------------------------|------|-------------------------|------|-------------------------|------|-------------------------|
| time<br>[h] | time<br>[d] | pH               | conductivity<br>[μS/cm] | pH     | conductivity<br>[μS/cm] | pH           | conductivity<br>[μS/cm] | pH      | conductivity<br>[μS/cm] | pH   | conductivity<br>[μS/cm] | pH   | conductivity<br>[μS/cm] | pH   | conductivity<br>[μS/cm] | pH   | conductivity<br>[μS/cm] |
| 6           | 0.25        | 6.6              | 3.6                     | 6.5    | 5.7                     | 6.5          | 2.7                     | 5.7     | 3.3                     | 6.2  | 8.0                     | 6.0  | 6.3                     |      |                         | 9.0  | 18.4                    |
| 18          | 1           | 6.5              | 1.5                     | 6.2    | 4.9                     | 6.5          | 2.4                     | 5.8     | 2.1                     | 6.2  | 3.5                     | 6.1  | 2.0                     |      |                         | 9.1  | 26.8                    |
| 30          | 2.25        | 6.2              | 1.9                     | 6.3    | 3.8                     | 6.4          | 2.5                     | 5.7     | 1.6                     | 6.3  | 2.5                     | 6.0  | 2.3                     |      |                         | 9.4  | 28.9                    |
| 42          | 4           | 6.2              | 1.5                     | 6.5    | 3.8                     | 6.5          | 2.5                     | 6.6     | 1.5                     | 6.1  | 2.2                     | 6.1  | 2.6                     |      |                         | 9.7  | 41.6                    |
| 5           | 9           | 6.4              | 2.6                     | 6.7    | 6.2                     | 6.6          | 4.5                     | 6.0     | 1.9                     | 6.1  | 2.7                     | 6.2  | 1.5                     |      |                         | 9.7  | 72.6                    |
| 7           | 16          | 6.5              | 2.8                     | 6.9    | 6.4                     | 6.9          | 3.9                     | 6.1     | 1.9                     | 6.1  | 2.6                     | 6.2  | 1.5                     |      |                         | 10.1 | 99.5                    |
| 20          | 36          | 6.7              | 3.5                     | 7.0    | 14.1                    | 6.8          | 8.4                     | 6.6     | 2.5                     | 6.3  | 3.6                     | 6.1  | 2.4                     |      |                         | 11.4 | 185.8                   |
| 28          | 64          | 6.3              | 3.5                     | 7.2    | 10.3                    | 8.0          | 7.0                     | 6.9     | 2.5                     | 6.2  | 3.6                     | 6.3  | 2.8                     |      |                         | 10.8 | 257.4                   |
| 6           | 0.25        | 6.4              | 4.6                     | 6.8    | 3.4                     | 6.6          | 2.3                     | 6.3     | 2.5                     | 6.6  | 5.3                     | 6.2  | 2.9                     | 5.9  | 3.2                     | 9.2  | 20.1                    |
| 18          | 1           | 6.4              | 2.5                     | 6.1    | 3.2                     | 6.9          | 1.9                     | 6.3     | 3.1                     | 6.5  | 4.0                     | 6.1  | 1.3                     | 5.8  | 3.5                     | 9.6  | 35.6                    |
| 30          | 2.25        | 6.2              | 4.0                     | 6.4    | 2.1                     | 6.6          | 2.2                     | 6.4     | 3.8                     | 6.5  | 3.1                     | 6.1  | 1.7                     | 6.0  | 2.1                     | 10.0 | 49.1                    |
| 42          | 4           | 6.1              | 3.7                     | 6.3    | 2.9                     | 6.6          | 2.1                     | 6.7     | 4.9                     | 6.2  | 2.1                     | 6.2  | 1.5                     | 5.8  | 1.8                     | 10.3 | 77.0                    |
| 5           | 9           | 6.4              | 9.2                     | 6.6    | 3.0                     | 6.6          | 4.4                     | 6.8     | 10.6                    | 6.1  | 2.7                     | 6.2  | 1.9                     | 6.0  | 2.8                     | 10.6 | 187.3                   |
| 7           | 16          | 6.7              | 11.8                    | 6.9    | 3.4                     | 6.9          | 4.4                     | 7.0     | 12.2                    | 6.3  | 2.3                     | 6.1  | 1.9                     | 6.0  | 3.8                     | 10.9 | 291.5                   |
| 20          | 36          | 6.8              | 24.3                    | 6.9    | 8.4                     | 6.8          | 7.5                     | 7.4     | 21.1                    | 6.3  | 3.1                     | 6.2  | 3.3                     | 6.2  | 2.5                     | 11.4 | 600.0                   |
| 28          | 64          | 7.2              | 25.9                    | 6.9    | 5.3                     | 7.5          | 7.3                     | 7.0     | 24.3                    | 6.3  | 3.0                     | 6.3  | 3.3                     | 6.0  | 2.3                     | 11.5 | 742.0                   |
| 6           | 0.25        | 6.0              | 3.5                     | 6.8    | 3.5                     | 6.6          | 2.0                     | 6.7     | 1.3                     | 6.6  | 3.9                     | 6.2  | 4.7                     | 5.9  | 6.0                     | 9.2  | 19.7                    |
| 18          | 1           | 6.0              | 1.4                     | 6.3    | 2.7                     | 6.4          | 1.3                     | 6.0     | 1.5                     | 6.3  | 2.5                     | 6.3  | 1.9                     | 6.1  | 1.8                     | 9.5  | 33.1                    |
| 30          | 2.25        | 6.0              | 1.3                     | 6.5    | 2.4                     | 6.6          | 1.3                     | 5.7     | 1.3                     | 6.4  | 1.7                     | 6.3  | 1.7                     | 6.0  | 2.3                     | 9.7  | 43.0                    |
| 42          | 4           | 5.8              | 1.4                     | 6.3    | 2.4                     | 6.5          | 1.3                     | 6.1     | 1.3                     | 6.3  | 2.3                     | 6.3  | 1.6                     | 6.1  | 2.7                     | 10.1 | 76.2                    |
| 5           | 9           | 6.0              | 2.0                     | 6.6    | 3.7                     | 6.6          | 2.3                     | 6.4     | 2.1                     | 6.0  | 1.8                     | 6.4  | 2.0                     | 6.1  | 2.9                     | 10.6 | 173.6                   |
| 7           | 16          | 5.9              | 3.0                     | 6.9    | 4.2                     | 6.9          | 2.5                     | 6.6     | 2.3                     | 6.0  | 1.6                     | 6.3  | 1.9                     | 6.3  | 4.7                     | 10.8 | 237.9                   |
| 20          | 36          | 6.0              | 3.5                     | 6.9    | 11.1                    | 6.9          | 5.2                     | 6.9     | 3.7                     | 6.3  | 2.4                     | 6.2  | 3.6                     | 6.2  | 2.8                     | 11.2 | 419.0                   |
| 28          | 64          | 5.9              | 3.6                     | 6.9    | 6.5                     | 6.8          | 5.1                     | 6.9     | 3.7                     | 6.3  | 2.7                     | 6.4  | 2.9                     | 6.2  | 3.1                     | 11.2 | 478.0                   |

2

3

4

5

6 **Table I.** Continued conductivity and pH values of the DSLTs measured by LAB2.

|             |             | Karbon Quartzite |                         | Basalt |                         | Granodiorite |                         | Granite |                         | CUS1 |                         | CUS2 |                         | CUS3 |                         | LDS  |                         |
|-------------|-------------|------------------|-------------------------|--------|-------------------------|--------------|-------------------------|---------|-------------------------|------|-------------------------|------|-------------------------|------|-------------------------|------|-------------------------|
| time<br>[h] | time<br>[d] | pH               | conductivity<br>[μS/cm] | pH     | conductivity<br>[μS/cm] | pH           | conductivity<br>[μS/cm] | pH      | conductivity<br>[μS/cm] | pH   | conductivity<br>[μS/cm] | pH   | conductivity<br>[μS/cm] | pH   | conductivity<br>[μS/cm] | pH   | conductivity<br>[μS/cm] |
| 6           | 0.25        | 6.1              | 1.8                     | 6.8    | 2.4                     | 6.8          | 5.9                     | 6.3     | 3.1                     | 6.3  | 7.1                     | 6.0  | 4.1                     | 6.0  | 2.6                     | 9.2  | 24.8                    |
| 18          | 1           | 5.9              | 1.3                     | 5.8    | 2.1                     | 6.6          | 2.4                     | 6.7     | 4.6                     | 6.3  | 4.0                     | 6.1  | 1.2                     | 5.9  | 1.5                     | 9.6  | 32.2                    |
| 30          | 2.25        | 6.2              | 1.2                     | 6.5    | 2.1                     | 6.8          | 2.4                     | 7.0     | 5.3                     | 6.5  | 3.0                     | 6.0  | 1.4                     | 6.0  | 2.5                     | 9.7  | 39.3                    |
| 42          | 4           | 7.0              | 1.3                     | 6.1    | 2.4                     | 6.9          | 2.4                     | 6.6     | 6.6                     | 6.4  | 2.4                     | 6.1  | 1.4                     | 6.0  | 2.0                     | 10.0 | 57.2                    |
| 5           | 9           | 6.3              | 1.7                     | 6.4    | 4.7                     | 6.9          | 4.7                     | 6.9     | 14.3                    | 6.1  | 3.1                     | 6.3  | 1.2                     | 6.2  | 2.1                     | 10.4 | 122.2                   |
| 7           | 16          | 6.1              | 2.0                     | 6.7    | 5.7                     | 7.2          | 4.4                     | 7.4     | 17.3                    | 6.2  | 3.4                     | 6.2  | 1.4                     | 6.4  | 2.2                     | 10.6 | 162.2                   |
| 20          | 36          | 6.3              | 2.7                     | 6.9    | 15.6                    | 7.2          | 9.0                     | 7.5     | 29.5                    | 6.3  | 4.7                     | 6.1  | 2.2                     | 6.3  | 3.3                     | 11.0 | 312.0                   |
| 28          | 64          | 6.2              | 2.7                     | 7.0    | 11.1                    | 6.7          | 8.0                     | 7.3     | 33.2                    | 6.3  | 4.8                     | 6.3  | 2.3                     | 6.2  | 2.6                     | 11.2 | 411.0                   |
| 6           | 0.25        | 6.4              | 2.3                     | 6.6    | 3.1                     | 7.1          | 3.8                     | 6.3     | 1.4                     | 5.9  | 5.9                     | 6.0  | 5.0                     | 6.0  | 3.2                     | 8.8  | 13.7                    |
| 18          | 1           | 5.9              | 1.3                     | 6.2    | 2.5                     | 6.4          | 2.9                     | 6.2     | 1.3                     | 6.2  | 3.3                     | 6.1  | 1.8                     | 5.8  | 1.7                     | 9.5  | 24.5                    |
| 30          | 2.25        | 6.4              | 1.1                     | 6.5    | 2.2                     | 6.9          | 3.5                     | 6.1     | 1.8                     | 6.7  | 1.7                     | 6.2  | 1.9                     | 5.9  | 2.4                     | 9.5  | 29.3                    |
| 42          | 4           | 7.1              | 1.2                     | 6.1    | 3.3                     | 7.0          | 3.7                     | 6.3     | 1.9                     | 6.1  | 1.4                     | 6.2  | 2.1                     | 5.9  | 1.9                     | 9.8  | 45.0                    |
| 5           | 9           | 6.4              | 1.8                     | 6.4    | 2.9                     | 7.3          | 7.7                     | 6.7     | 2.9                     | 6.2  | 2.1                     | 6.5  | 3.7                     | 6.1  | 2.1                     | 10.2 | 90.8                    |
| 7           | 16          | 7.0              | 1.8                     | 6.9    | 3.3                     | 7.2          | 8.1                     | 7.0     | 2.9                     | 6.1  | 1.8                     | 6.3  | 2.1                     | 6.1  | 1.9                     | 10.5 | 124.0                   |
| 20          | 36          | 6.3              | 2.5                     | 6.7    | 13.6                    | 7.3          | 18.3                    | 6.6     | 4.1                     | 6.2  | 2.8                     | 6.3  | 44.7                    | 6.2  | 2.3                     | 11.0 | 264.0                   |
| 28          | 64          | 6.0              | 2.6                     | 6.8    | 4.9                     | 6.9          | 18.2                    | 6.9     | 3.8                     | 6.1  | 2.9                     | 6.6  | 4.5                     | 6.1  | 2.5                     | 11.1 | 339.0                   |

7

8

**DSL** **T** **practical considerations and potential improvements of potential**  
**following technical specification** The blank criterion defined by the technical specification can be summarized as: 1. Performance of a vessel leaching test over 24 h, preparation of the sample as the others; 2. repetition of step 1 and measurement of the conductivity; 3. the frequency of blank testing is related to the number of tests performed by a laboratory; 4. in the first eluate of the blank test, the concentration of each substance considered, shall be less than 10% of the calculated average concentration in the first three eluate fractions of the product test, or below the limit of quantification; 5. the electrical conductivity of the second blank eluate shall be <0.5 mS/m and 6. if these requirements are not fulfilled, the necessary steps to reduce the contamination have to be taken.

Two main reasons for not fulfilling the blank criteria in this study are visible (Table J and K): The first is based on the 10% criterion of the TS [3] (Table L LAB2) which is difficult to fulfill if the material is inert in combination with low LoQs. The other reason is caused by contaminations (Table J LAB1, Cu, Ni, Pb, Sn and V) and may occur in addition to the first. In point 6.2 of the TS the quality of the leachate (resp. eluent) is defined: "Use as a leachant demineralized water or deionized water or water of equivalent purity with a conductivity < 0.5 mS/m according to grade 3 specified by EN ISO 3696 [2]. In this study the contract laboratory fulfilled this criterion, but the blanks analyzed by the authors revealed that the Cu, Ni, Pb and Zn data could not be used in the product evaluation due to elevated background values and, hence, had to be excluded. For these two reasons ((i) the stricter, the better and (ii) quality criterion of the leachant < 0.5 mS/m) from an applied analytical point of view the blank test criterion as defined by the TS does not help ensure to gain reliable data. In addition, the technical specification does not deliver provision on how the data set has to be treated if quality criteria are not fulfilled. With respect to contracting and

commissioning, it seems easily possible to demand additional and stricter criteria for good laboratory practice. Regarding regulative demands, it is questionable if in case of a harmonized EU document like the TS it is possible to demand stricter criteria on blank values in nationally based daughter specification. From the authors point of view there is no practical benefit from the blank test as defined by the TS [3] if no additional quality criteria are required. In the recent version of the TS it is not possible to distinguish between exceedance due to very low limits of quantification (e.g., in ICP-MS analyses) combined with high quality products tested and exceedance caused by contamination from e.g., leachants that contain brass alloy metals since both end up with evaluation: blank criterion not fulfilled.

#### **Reduced test times**

To reduce the manufacturers' and costumers workload DSLTs with shorter test times should be available after the initial product testing. Shortening the test from 64 days with eight fractions, to nine days and five fractions delivers, on the one hand enough reliability with respect to the release (significantly after peak release and enough samples to identify outliers). On the other hand, this shorter test is fast and cost efficient in the continuous product monitoring. Table A10 compares the nine days test MRLs with the results from the DSLTs. To derive the nine days MRLs in the calculation in Table 2 64 d was exchanged by 9 d taking into account that with this approach stricter criteria are defined (in this setup the peak release strongly impacts the evaluation). Hence, the future procedure after initial material testing might be that all materials are tested with nine days DSLTs. For materials that fulfill the slightly stricter criteria, no need for 64 d monitoring tests is given. Materials which do not fulfill the nine days criteria must be tested over the full timespan and must comply with the 64 d criteria.

61 **Table J.** Mean release values [mg/m<sup>2</sup>/9d] of n = 5 DSLTs (Lab2; Table B-H. SD = standard deviation) compared to MRLs. Values > low frequency  
62 exchange MRL = italic. underlined and light grey; values > high frequency exchange value 6 h = bold. underlined and dark grey. \*EQS Cr(III)  
63 \*\*<LoQs; the LoQs are given in Table B-H for the respective elements. All data based on DSLTs and analyses performed by BfG.

| Analyte         | As          | SD    | Ba   | SD   | Cd          | SD   | Cr*  | SD   | Cu          | SD   | Ni          | SD   | Pb          | SD    | Se   | SD    | Sn   | SD | V         | SD    | Zn          | SD   |
|-----------------|-------------|-------|------|------|-------------|------|------|------|-------------|------|-------------|------|-------------|-------|------|-------|------|----|-----------|-------|-------------|------|
| MRL 24h         | 0.1         | -     | 9.0  | -    | 0.04        | -    | 0.5  | -    | 1.2         | -    | 0.6         | -    | 0.2         | -     | 0.4  | -     | 0.5  | -  | 0.4       | -     | 1.6         | -    |
| MRL 6h          | 0.6         | -     | 36   | -    | 0.1         | -    | 2.0  | -    | 4.7         | -    | 2.4         | -    | 0.7         | -     | 1.8  | -     | 2.1  | -  | 1.4       | -     | 6.6         | -    |
| Karbon Quarzite | 0.02        | 0.005 | 0.49 | 0.61 | <LoQ        | -    | 0.05 | 0.06 | <LoQ        | -    | 0.03        | 0.02 | <LoQ        | -     | <LoQ | -     | <LoQ | -  | <LoQ      | -     | 0.21        | 0.02 |
| Basalt          | <LoQ        | -     | 0.14 | 0.03 | <LoQ        | -    | <LoQ | -    | 0.33        | 0.30 | 0.02        | 0.00 | 0.02        | 0.01  | <LoQ | -     | <LoQ | -  | 0.09      | 0.07  | 0.33        | 0.27 |
| Greywacke       | 0.06        | 0.03  | 2.84 | 1.55 | <LoQ        | -    | 0.01 | 0.01 | 0.02        | 0.01 | 0.03        | 0.01 | 0.02        | 0.02  | 0.03 | 0.005 | <LoQ | -  | 0.01      | 0.002 | 0.72        | 0.37 |
| Granodiorite    | 0.04        | 0.01  | 0.41 | 0.02 | <LoQ        | -    | <LoQ | -    | 0.05        | 0.04 | 0.06        | 0.07 | 0.01        | 0.001 | <LoQ | -     | <LoQ | -  | 0.02      | 0.01  | 0.30        | 0.21 |
| Granite         | <u>0.18</u> | 0.17  | 0.12 | 0.02 | <LoQ        | -    | 0.01 | 0.00 | 0.02        | 0.01 | 0.01        | 0.01 | 0.005       | 0.001 | <LoQ | -     | <LoQ | -  | 0.01      | 0.004 | <u>3.47</u> | 2.41 |
| CUS1            | <u>0.33</u> | 0.07  | 2.0  | 0.26 | <u>0.11</u> | 0.08 | <LoQ | -    | <u>9.98</u> | 3.16 | <u>1.38</u> | 0.99 | <u>0.22</u> | 0.13  | <LoQ | -     | <LoQ | -  | <LoQ      | -     | <u>23</u>   | 12   |
| CUS2            | <u>0.20</u> | 0.09  | 0.56 | 0.24 | <u>0.14</u> | 0.06 | <LoQ | -    | <u>29</u>   | 9.2  | <u>2.8</u>  | 2.3  | <u>7.0</u>  | 5.1   | <LoQ | -     | <LoQ | -  | <LoQ      | -     | <u>16</u>   | 5.9  |
| CUS3            | <u>0.45</u> | 0.31  | 0.34 | 0.21 | <u>0.05</u> | 0.01 | <LoQ | -    | <u>28</u>   | 7.8  | <u>1.5</u>  | 1.2  | 0.1         | 0.04  | <LoQ | -     | <LoQ | -  | 0.02      | 4E-04 | <u>6.8</u>  | 1.7  |
| LDS             | <LoQ        | -     | 0.79 | 0.20 | <LoQ        | -    | 0.22 | 0.06 | 0.03        | 0.03 | 0.08        | 0.13 | 0.01        | 4E-04 | <LoQ | -     | <LoQ | -  | <u>19</u> | 5.71  | 0.22        | 0.04 |

64

65

66 **Table K.** Evaluation of the blank criteria as described by the TS [3] LAB1.

| material         | stone | As  | Ba  | Cd  | Cr  | Cu | Ni  | Pb | Se  | Sn  | V   | Zn  | criterion fulfilled | criterion not fulfilled |
|------------------|-------|-----|-----|-----|-----|----|-----|----|-----|-----|-----|-----|---------------------|-------------------------|
| Karbon Quartzite | 1     | yes | yes | yes | yes | no | no  | no | yes | yes | no  | yes | 7                   | 4                       |
|                  | 2     | yes | yes | yes | yes | no | no  | no | yes | yes | no  | yes | 7                   | 4                       |
|                  | 3     | yes | yes | yes | yes | no | no  | no | yes | yes | no  | yes | 7                   | 4                       |
|                  | 4     | yes | yes | yes | yes | no | no  | no | yes | yes | no  | yes | 7                   | 4                       |
|                  | 5     | yes | yes | yes | yes | no | no  | no | yes | yes | no  | yes | 7                   | 4                       |
| Basalt           | 1     | yes | yes | yes | yes | no | no  | no | yes | no  | no  | yes | 6                   | 5                       |
|                  | 2     | yes | yes | yes | yes | no | no  | no | yes | no  | no  | yes | 6                   | 5                       |
|                  | 3     | yes | yes | yes | yes | no | no  | no | yes | no  | no  | yes | 6                   | 5                       |
|                  | 4     | yes | yes | yes | yes | no | no  | no | yes | no  | yes | yes | 7                   | 4                       |
|                  | 5     | yes | yes | yes | yes | no | no  | no | yes | no  | yes | yes | 7                   | 4                       |
| Greywacke        | 1     | yes | yes | yes | yes | no | yes | no | yes | no  | no  | yes | 7                   | 4                       |
|                  | 2     | yes | yes | yes | yes | no | no  | no | yes | no  | no  | yes | 6                   | 5                       |
|                  | 3     | yes | yes | yes | yes | no | no  | no | yes | no  | no  | yes | 6                   | 5                       |
|                  | 4     | yes | yes | yes | yes | no | no  | no | yes | no  | no  | yes | 6                   | 5                       |
|                  | 5     | yes | yes | yes | yes | no | no  | no | yes | no  | no  | yes | 6                   | 5                       |
| Granodiorite     | 1     | yes | yes | yes | yes | no | no  | no | yes | no  | no  | yes | 6                   | 5                       |
|                  | 2     | yes | yes | yes | yes | no | no  | no | yes | no  | no  | yes | 6                   | 5                       |
|                  | 3     | yes | yes | yes | yes | no | no  | no | yes | no  | no  | yes | 6                   | 5                       |
|                  | 4     | yes | yes | yes | yes | no | no  | no | yes | no  | no  | yes | 6                   | 5                       |
|                  | 5     | yes | yes | yes | yes | no | no  | no | yes | no  | no  | yes | 6                   | 5                       |
| Granite          | 1     | yes | yes | yes | yes | no | no  | no | yes | no  | no  | yes | 6                   | 5                       |
|                  | 2     | yes | yes | yes | yes | no | no  | no | yes | no  | no  | yes | 6                   | 5                       |
|                  | 3     | yes | yes | yes | yes | no | no  | no | yes | no  | no  | yes | 6                   | 5                       |
|                  | 4     | yes | yes | yes | yes | no | no  | no | yes | no  | no  | yes | 6                   | 5                       |
|                  | 5     | yes | yes | yes | yes | no | no  | no | yes | no  | no  | yes | 6                   | 5                       |
| CUS1             | 1     | yes | yes | yes | yes | no | no  | no | yes | no  | no  | yes | 6                   | 5                       |
|                  | 2     | yes | yes | yes | yes | no | no  | no | yes | no  | no  | yes | 6                   | 5                       |
|                  | 3     | yes | yes | yes | yes | no | no  | no | yes | no  | no  | yes | 6                   | 5                       |
|                  | 4     | yes | yes | yes | yes | no | no  | no | yes | no  | no  | yes | 6                   | 5                       |
|                  | 5     | yes | yes | yes | yes | no | no  | no | yes | no  | no  | yes | 6                   | 5                       |
| LDS              | 1     | yes | yes | yes | yes | no | no  | no | yes | no  | yes | yes | 7                   | 4                       |
|                  | 2     | yes | yes | yes | yes | no | no  | no | yes | no  | yes | yes | 7                   | 4                       |
|                  | 3     | yes | yes | yes | yes | no | no  | no | yes | no  | yes | yes | 7                   | 4                       |
|                  | 4     | yes | yes | yes | yes | no | no  | no | yes | no  | yes | yes | 7                   | 4                       |
|                  | 5     | yes | yes | yes | yes | no | no  | no | yes | no  | yes | yes | 7                   | 4                       |

67

68

69 **Table L.** Evaluation of the blank criteria as described by the TS [3] LAB2.

| material         | stone | As  | Ba        | Cd  | Co  | Cr  | Cu        | Ni  | Pb        | Sn  | V         | Zn        | criterion fulfilled | criterion not fulfilled |
|------------------|-------|-----|-----------|-----|-----|-----|-----------|-----|-----------|-----|-----------|-----------|---------------------|-------------------------|
| Karbon Quartzite | 1     | yes | <b>no</b> | yes | yes | yes | yes       | yes | yes       | yes | yes       | yes       | 10                  | 1                       |
|                  | 2     | yes | <b>no</b> | yes | yes | yes | yes       | yes | yes       | yes | yes       | yes       | 10                  | 1                       |
|                  | 3     | yes | <b>no</b> | yes | yes | yes | yes       | yes | yes       | yes | yes       | yes       | 10                  | 1                       |
|                  | 4     | yes | <b>no</b> | yes | yes | yes | yes       | yes | yes       | yes | yes       | yes       | 10                  | 1                       |
|                  | 5     | yes | <b>no</b> | yes | yes | yes | yes       | yes | yes       | yes | yes       | yes       | 10                  | 1                       |
| Basalt           | 1     | yes | yes       | yes | yes | yes | <b>no</b> | yes | <b>no</b> | yes | yes       | yes       | 9                   | 2                       |
|                  | 2     | yes | yes       | yes | yes | yes | <b>no</b> | yes | <b>no</b> | yes | yes       | <b>no</b> | 8                   | 3                       |
|                  | 3     | yes | yes       | yes | yes | yes | yes       | yes | <b>no</b> | yes | yes       | <b>no</b> | 9                   | 2                       |
|                  | 4     | yes | yes       | yes | yes | yes | <b>no</b> | yes | <b>no</b> | yes | yes       | <b>no</b> | 8                   | 3                       |
|                  | 5     | yes | yes       | yes | yes | yes | yes       | yes | <b>no</b> | yes | yes       | <b>no</b> | 9                   | 2                       |
| Greywacke        | 1     | yes | yes       | yes | yes | yes | yes       | yes | <b>no</b> | yes | yes       | yes       | 10                  | 1                       |
|                  | 2     | yes | yes       | yes | yes | yes | yes       | yes | yes       | yes | yes       | yes       | 11                  | 0                       |
|                  | 3     | yes | yes       | yes | yes | yes | yes       | yes | <b>no</b> | yes | yes       | yes       | 10                  | 1                       |
|                  | 4     | yes | yes       | yes | yes | yes | yes       | yes | <b>no</b> | yes | yes       | yes       | 10                  | 1                       |
|                  | 5     | yes | yes       | yes | yes | yes | yes       | yes | <b>no</b> | yes | yes       | yes       | 10                  | 1                       |
| Granodiorite     | 1     | yes | yes       | yes | yes | yes | yes       | yes | yes       | yes | yes       | yes       | 11                  | 0                       |
|                  | 2     | yes | yes       | yes | yes | yes | yes       | yes | yes       | yes | yes       | yes       | 11                  | 0                       |
|                  | 3     | yes | yes       | yes | yes | yes | yes       | yes | yes       | yes | yes       | yes       | 11                  | 0                       |
|                  | 4     | yes | yes       | yes | yes | yes | yes       | yes | yes       | yes | yes       | yes       | 11                  | 0                       |
|                  | 5     | yes | yes       | yes | yes | yes | yes       | yes | yes       | yes | yes       | yes       | 11                  | 0                       |
| Granite          | 1     | yes | <b>no</b> | yes | yes | yes | yes       | yes | yes       | yes | <b>no</b> | <b>no</b> | 8                   | 3                       |
|                  | 2     | yes | <b>no</b> | yes | yes | yes | yes       | yes | yes       | yes | <b>no</b> | <b>no</b> | 8                   | 3                       |
|                  | 3     | yes | <b>no</b> | yes | yes | yes | yes       | yes | yes       | yes | <b>no</b> | <b>no</b> | 8                   | 3                       |
|                  | 4     | yes | <b>no</b> | yes | yes | yes | yes       | yes | yes       | yes | <b>no</b> | <b>no</b> | 8                   | 3                       |
|                  | 5     | yes | <b>no</b> | yes | yes | yes | yes       | yes | yes       | yes | <b>no</b> | <b>no</b> | 8                   | 3                       |
| CUS2             | 1     | yes | yes       | yes | yes | yes | yes       | yes | yes       | yes | yes       | yes       | 11                  | 0                       |
|                  | 2     | yes | yes       | yes | yes | yes | yes       | yes | yes       | yes | yes       | yes       | 11                  | 0                       |
|                  | 3     | yes | yes       | yes | yes | yes | yes       | yes | yes       | yes | yes       | yes       | 11                  | 0                       |
|                  | 4     | yes | yes       | yes | yes | yes | yes       | yes | yes       | yes | yes       | yes       | 11                  | 0                       |
|                  | 5     | yes | yes       | yes | yes | yes | yes       | yes | yes       | yes | yes       | yes       | 11                  | 0                       |
| CUS3             | 1     | *   | *         | *   | *   | *   | *         | *   | *         | *   | *         | *         | *                   | *                       |
|                  | 2     | yes | yes       | yes | yes | yes | yes       | yes | yes       | yes | yes       | yes       | 11                  | 0                       |
|                  | 3     | yes | yes       | yes | yes | yes | yes       | yes | yes       | yes | yes       | yes       | 11                  | 0                       |
|                  | 4     | yes | yes       | yes | yes | yes | yes       | yes | yes       | yes | yes       | yes       | 11                  | 0                       |
|                  | 5     | yes | yes       | yes | yes | yes | yes       | yes | yes       | yes | yes       | yes       | 11                  | 0                       |
| LDS              | 1     | yes | yes       | yes | yes | yes | yes       | yes | yes       | yes | yes       | <b>no</b> | 10                  | 1                       |
|                  | 2     | yes | yes       | yes | yes | yes | yes       | yes | yes       | yes | yes       | <b>no</b> | 10                  | 1                       |
|                  | 3     | yes | yes       | yes | yes | yes | yes       | yes | yes       | yes | yes       | <b>no</b> | 10                  | 1                       |
|                  | 4     | yes | yes       | yes | yes | yes | yes       | yes | yes       | yes | yes       | <b>no</b> | 10                  | 1                       |
|                  | 5     | yes | yes       | yes | yes | yes | yes       | yes | yes       | yes | yes       | <b>no</b> | 10                  | 1                       |

\*only 4 Stones were available.

72

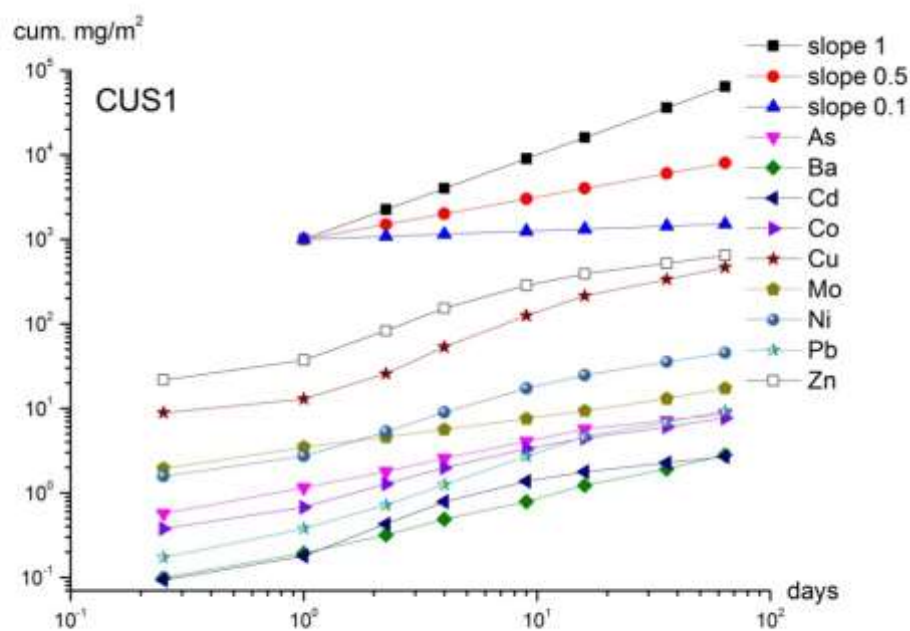

73

74 **Fig I.** log/log diagrams on the release of metal(loid)s from CUS1. Missing analytes were  
75 below the respective LoQ (Tables B-H).

76

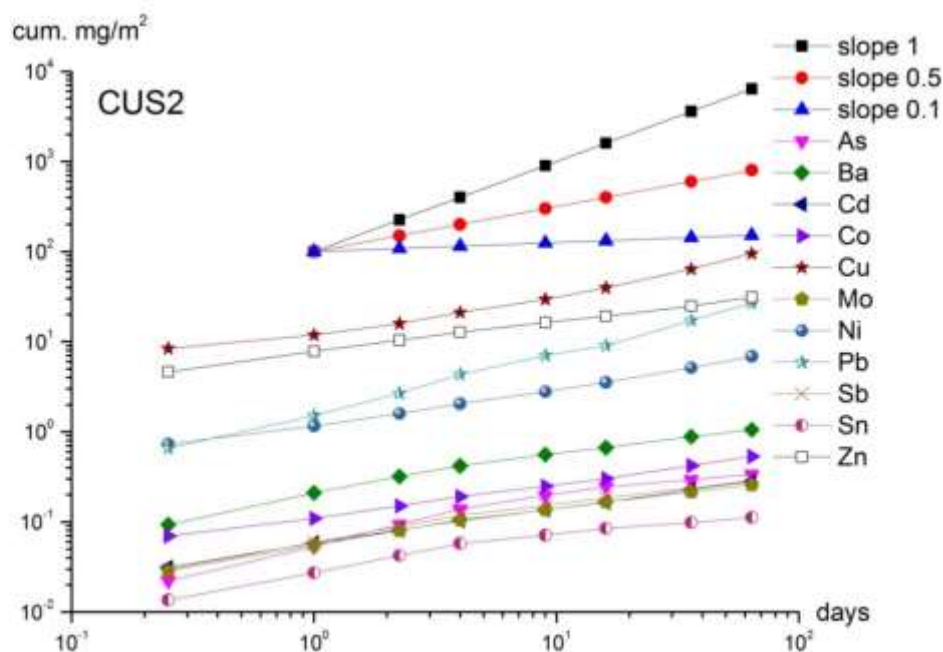

77

78 **Fig J.** log/log diagrams on the release of metal(loid)s from CUS2. Missing analytes were  
79 below the respective LoQ (Tables B-H).

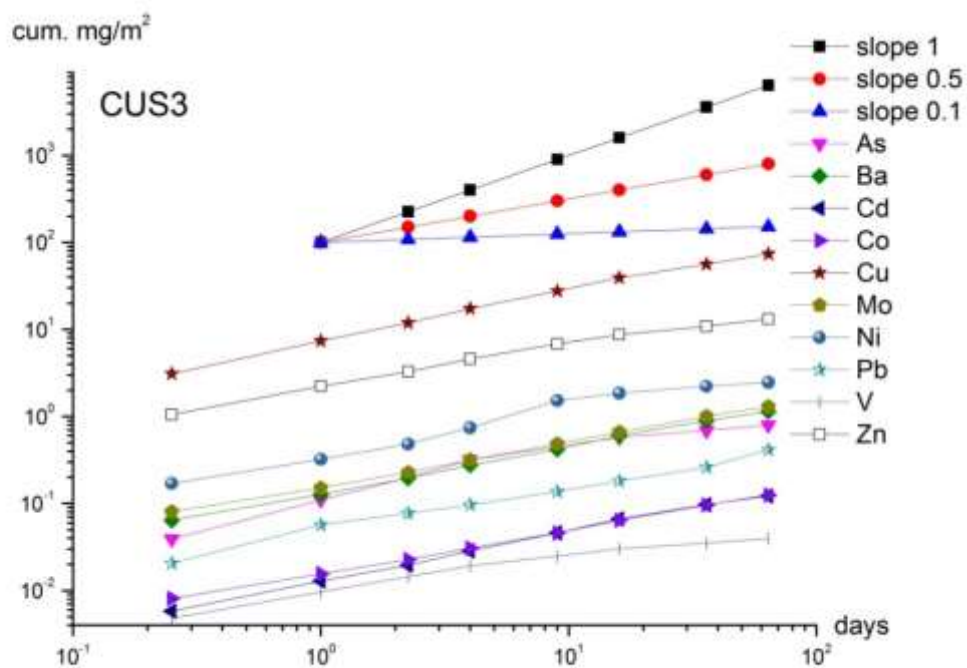

**Fig K.** log/log diagrams on the release of metal(loid)s from CUS3. Missing analytes were below the respective LoQ (Tables B-H).

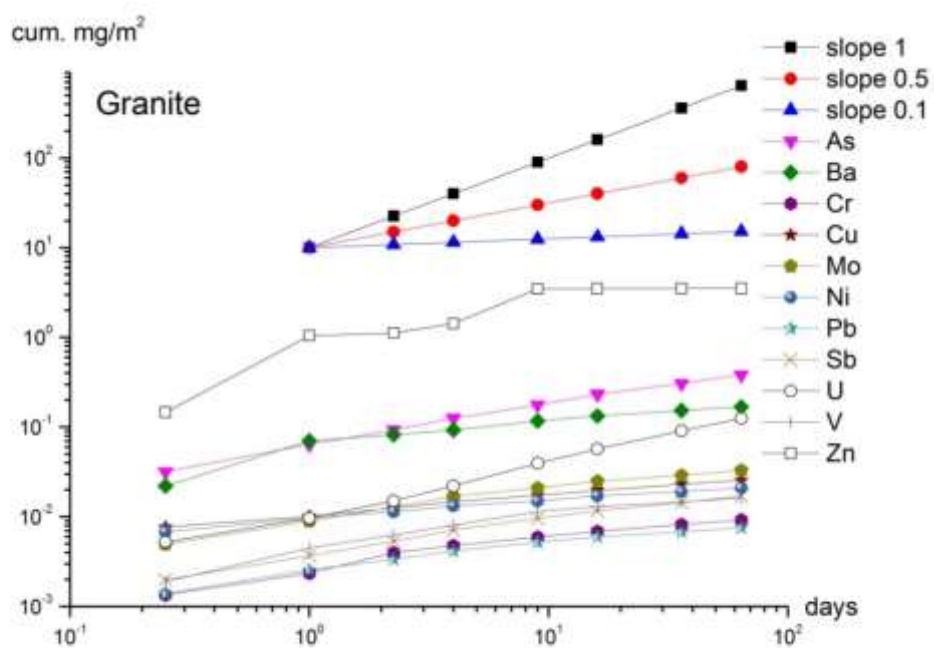

**Fig L.** log/log diagrams on the release of metal(loid)s from Granite. Missing analytes were below the respective LoQ (Tables B-H).

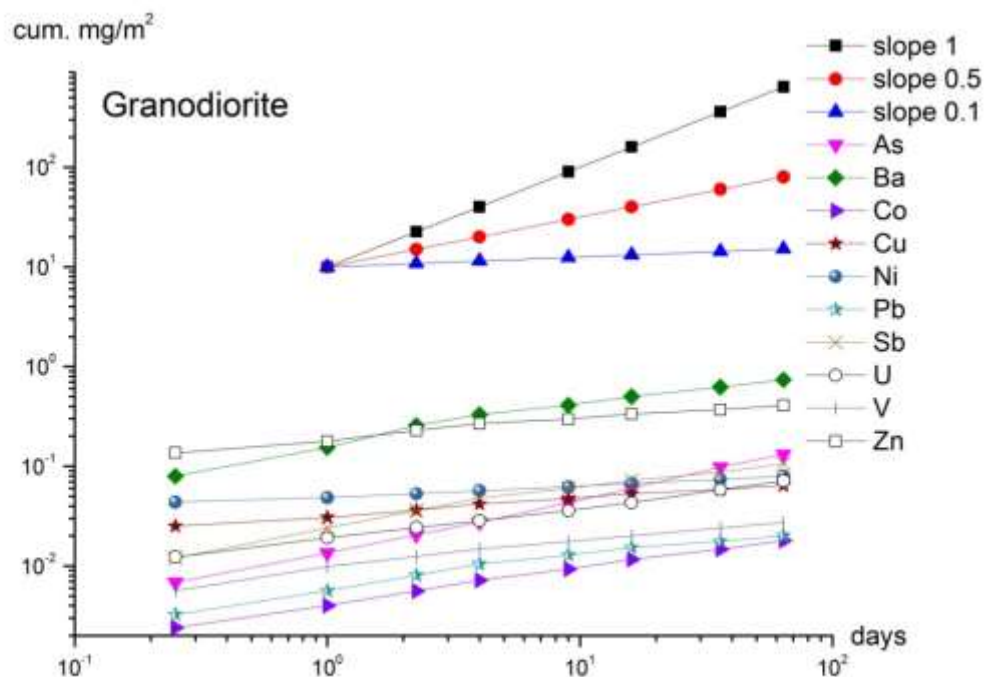

86

87 **Fig M.** log/log diagrams on the release of metal(loid)s from Granodiorite. Missing analytes  
88 were below the respective LoQ (Tables B-H).

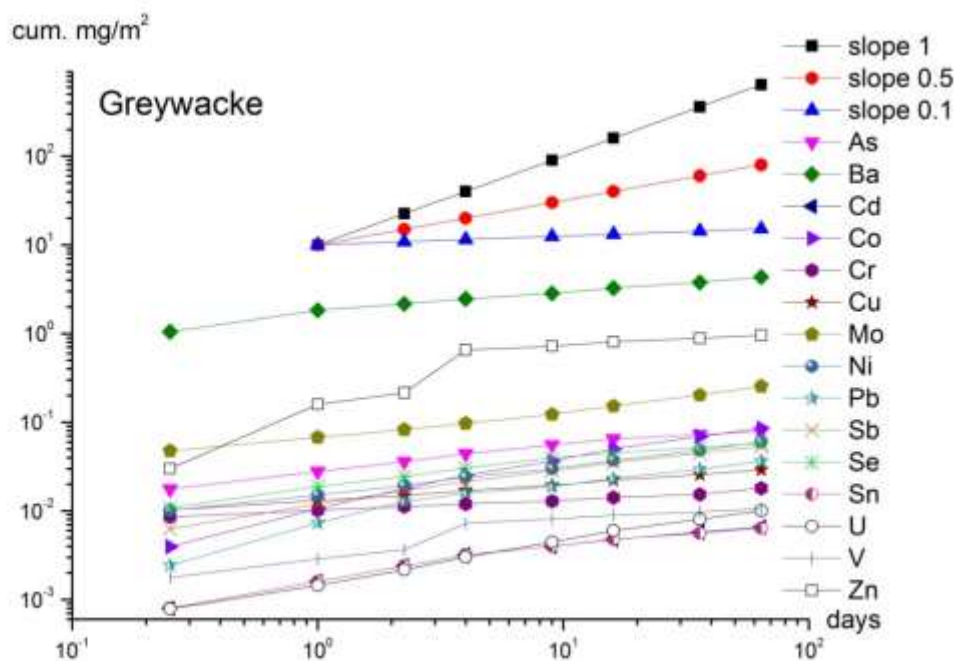

89

90 **Fig O.** log/log diagrams on the release of metal(loid)s from Greywacke. Missing analytes  
91 were below the respective LoQ (Tables B-H).

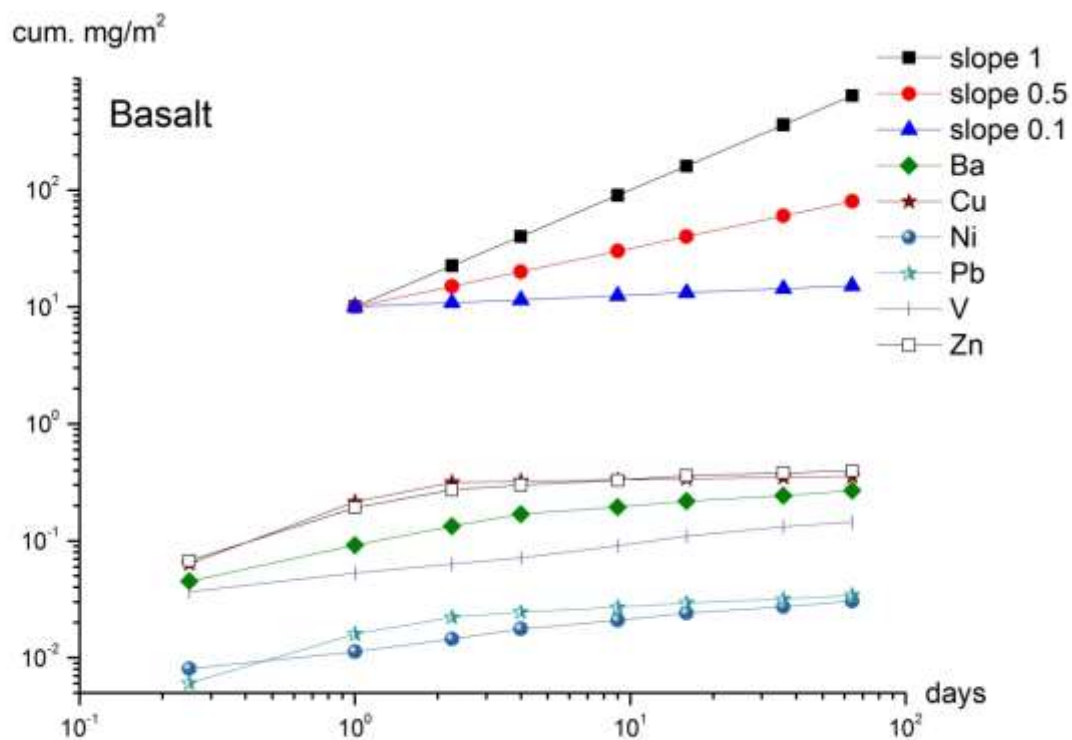

92

93 **Fig P.** log/log diagrams on the release of metal(loid)s from Basalt. Missing analytes were  
 94 below the respective LoQ (Tables B-H).

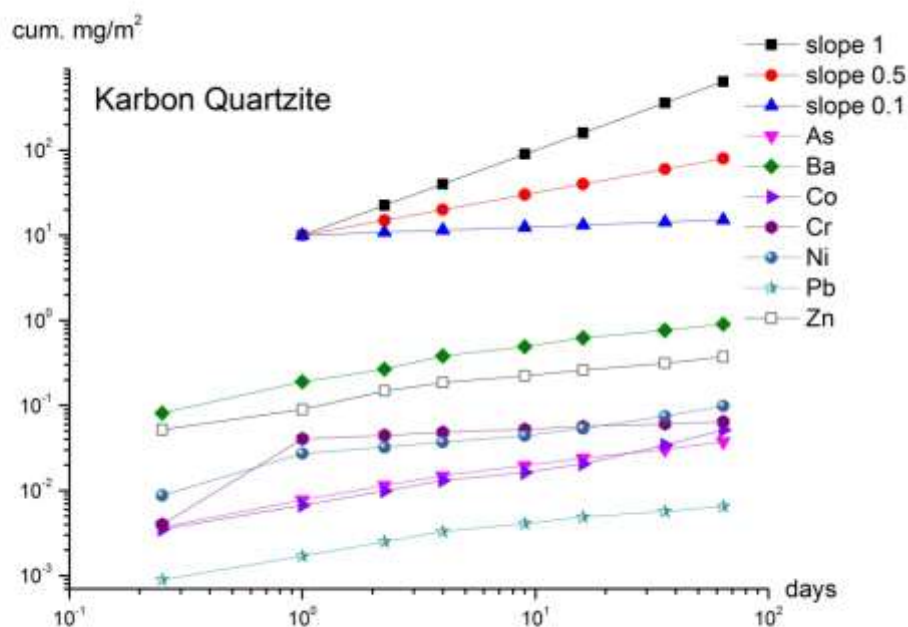

95

96 **Fig Q.** log/log diagrams on the release of metal(loid)s from Karbon Quartzite. Missing  
 97 analytes were below the respective LoQ (Tables B-H).

98

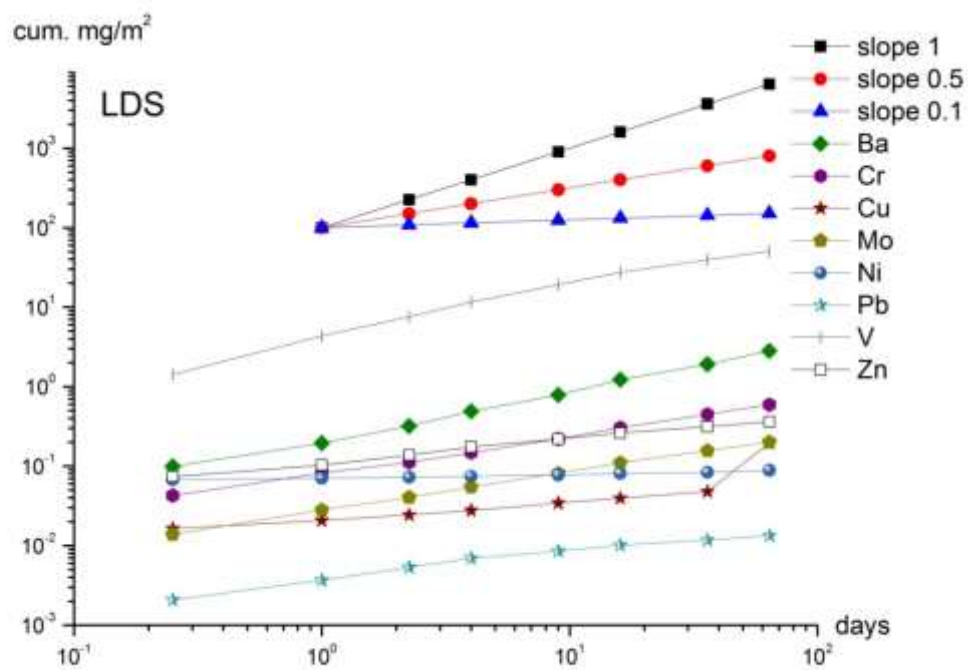

99

100 **Fig R.** log/log diagrams on the release of metal(loid)s from LDS. Missing analytes were  
 101 below the respective LoQ (Tables B-H).

102   **References**

103   [1] A. Schmukat, L. Duester, D. Ecker, H. Schmid, C. Heil, P. Heininger, T.A. Ternes,  
104   Leaching of metal(loid)s from a construction material: Influence of the particle size, specific  
105   surface area and ionic strength, Journal of Hazardous Materials, 227-228 (2012) 257-264.  
106

107   [2] ISO 3696 Water for analytical laboratory use -- Specification and test methods, in, 1987.

108

109   [3] DIN CEN/TS 16637-2; DIN SPEC 18046-2:2014-11: Construction products - Assessment  
110   of release of dangerous substances - Part 2: Horizontal dynamic surface leaching test; 2014.
